# Supplementary material for: Genetic analysis of DNA methylation in dyslipidemia: a case-control study
Source: PeerJ. 2022 Dec 19;10:e14590. doi: 10.7717/peerj.14590 (PMC9774006; doi:10.7717/peerj.14590)
Supplement: Supplemental Information 3 [file peerj-10-14590-s003.xlsx]

## Sheet: grina
sample number	group	gender	age	smoke	hypertension	Diabetes	Creatinine	Glucose	Glycated serum protein	TG	TC	HDL	LDL	polipoprotein A	polipoprotein B	Lipoprotein(a)	GRINA methylation
P27D03	control group	male	46	no	yes	no	54	4.65	2.02	1.59	3.66	1.09	2.09	1.23	1	107.75	0.703635
p27D01	control group	male	56	no	no	no	61	4.88	2.61	1.06	4.28	1.36	2.66	1.26	1.05	119.3	0.708408
P15C09	control group	female	58	no	no	no	45	4.14	2.27	1.13	2.49	1.73	1.37	0.93	0.42	437.3	0.753442
P22E07	control group	female	69	no	no	no	84	5.44	2.28	0.85	3.01	1.63	1.83	1.48	0.57	145.94	0.758524
P22E08	control group	female	54	no	no	no	51	4.47	2.48	0.35	2.6	1.1	1.31	1.14	0.51	143.52	0.930614
P27D08	control group	male	56	yes	no	no	95.72	5	2.5	1.41	4.15	1.85	1.96	1.79	0.67	151.41	0.93946
P25A12	control group	female	60	no	no	no	62	4.25	1.98	1.3	3.61	1.23	1.96	0.98	0.75	149.1	1.15427
p24G05	case group	male	72	yes	yes	no	61.59	6.83	2.7	1.93	3.6	0.97	2.56	1.07	0.76	75.47	1.18682
P25D09	control group	female	47	no	yes	no	52.97	4.84	1.85	0.92	3.71	1.22	1.98	1.44	0.73	104	1.20718
P14A08	case group	male	64	yes	yes	yes	65	2.53	1.18	4.23	1.37	2.61	1.44	0.57	683.7	18.1	1.26984
P14H09	control group	male	71	no	no	no	99	4.4	2.08	0.95	4.24	1.09	2.62	1.13	0.79	259.6	1.33763
P26D08	control group	male	62	no	no	no	72	5.54	2.54	0.57	2.55	1.05	1.19	0.9	0.23	71.29	1.33884
P26B05	control group	male	71	no	no	no	97	5.82	1.64	0.51	4.51	1.2	3.16	0.92	1.04	280.64	1.33968
P4D09	control group	male	69	no	no	no	84	4.73	2.21	0.9	4.76	1.4	3.39	1.1	0.96	798.18	1.3613
P22B09	control group	female	61	no	yes	yes	83	8.63	2.77	1.26	2.45	1.01	1.63	1.09	0.62	112.34	1.37768
P14G12	control group	male	69	no	no	no	84	4.94	2.5	1.27	4.14	1.06	2.52	1.2	0.74	57.7	1.38173
P6D12	case group	male	55	no	yes	yes	70	8.04	2.06	2.67	4.97	1.09	4.79	1.14	1.15	13.4	1.4178
P11D05	case group	male	71	no	yes	yes	98	6.1	1.6	2.66	5.5	0.78	4.04	1.07	1.13	86.3	1.43073
P22A01	control group	female	78	no	no	no	40	4.73	2.37	1.28	3.79	1.04	2.33	1.19	0.77	49.25	1.43858
P15E10	control group	female	63	no	no	no	28	4.22	2.87	1.49	3.08	1.01	1.76	1.23	0.58	64.91	1.48068
P4E09	case group	male	74	no	yes	no	73.64	10.24	2.1	1.02	4.68	0.99	3.4	1.15	1	343.36	1.49299
P14G06	control group	male	53	no	yes	no	86	4.37	2.06	1.23	3.3	1.91	1.79	1.03	0.65	205.44	1.51583
P2A08	control group	male	70	no	no	no	107	3.92	2.28	1.1	3.22	1.48	2	1.25	0.59	324.66	1.52047
P24E04	control group	male	57	yes	yes	no	81	4.37	2.44	1.27	3.63	1.09	2.44	1.08	2.44	1.08	1.52229
P22D02	control group	female	53	no	yes	no	44	4.95	2.65	1.67	3.24	1.02	1.98	1.24	0.57	145.53	1.5772
P3G04	case group	male	46	yes	no	no	82	5.27	2.66	3.28	5.57	1.67	4.01	1.21	0.75	130.21	1.5908
P4A06	case group	male	50	yes	yes	no	75	4.53	2.23	2.36	5.4	0.92	3.58	1.03	1.14	240.15	1.6035
P21G07	case group	female	63	no	yes	yes	51	7.35	2.69	1.35	4.88	1.15	3.57	1.19	0.83	82.04	1.60358
P5E10	case group	male	45	yes	no	yes	73.86	7.94	2.92	3.24	7.56	1.1	4.96	1.16	1.55	92.45	1.60466
P23E04	control group	male	85	no	yes	no	99	4.51	2.07	1.02	3.08	1.02	1.65	0.84	0.7	166.7	1.62283
P20E07	case group	female	76	no	yes	no	53	4.48	2.4	1.24	5.06	1.36	3.49	1.12	1.14	133.94	1.63237
P22B08	case group	female	63	no	yes	no	72.54	13.54	3.18	2.9	4.39	1.14	2.67	1.31	0.97	67.48	1.63368
P26E01	case group	female	80	no	yes	yes	83.49	10.26	3.13	2.84	4.92	0.67	3.32	1.04	1.09	191.59	1.67957
P1B06	case group	male	57	yes	no	no	81	4.17	2.25	2.46	5.95	1.25	3.95	1.54	1.19	118.84	1.68477
P1H09	case group	male	63	yes	yes	no	61.05	6.81	2.24	1.12	5.5	1.24	4.09	1.1	0.99	60.62	1.70833
P24B07	control group	male	73	no	no	yes	105	5.2	2.7	0.96	3.52	1.16	2.04	1.07	0.7	178.39	1.71412
P4E10	case group	male	61	yes	no	no	80	4.22	1.6	1.76	4.75	0.89	3.25	1	1.03	462.65	1.72216
P22A10	control group	female	55	no	no	no	51.37	8.8	3.4	0.71	4.02	2.08	1.72	1.91	0.65	126.76	1.76438
P23B10	control group	male	42	no	no	no	69.65	8.06	1.44	1.53	3.27	1.76	1.83	1.47	0.7	148.87	1.76742
P26D01	case group	female	73	no	yes	yes	73.89	10.79	3.28	3.95	7.98	0.85	5.38	0.99	1.64	199.87	1.78966
P5E02	control group	male	50	no	no	no	65	4.57	2.15	1.32	4.12	1.82	3.2	0.83	1.11	197.4	1.79222
P5G10	case group	male	71	yes	yes	no	57.09	8.38	2.14	0.65	6.86	1.48	4.63	1.5	1.22	94.5	1.79883
P4B02	case group	male	75	no	yes	no	112	4.66	2.6	1.46	4.64	0.87	3.55	0.87	0.91	92.95	1.80132
P15G02	control group	female	59	no	yes	yes	48.44	10.69	1.9	1.56	3.81	1.02	2	1.27	0.82	338.9	1.81979
P1D10	case group	male	48	yes	yes	no	68.49	7.48	1.9	2.65	4.67	0.8	3.19	0.97	1	662.26	1.83098
P20D12	case group	female	60	no	no	yes	56	8.08	2.3	2.13	5.2	1.01	3.31	1.17	1.02	103.3	1.86096
P26B09	case group	male	55	no	yes	no	1.96	7.07	1.96	1.11	5.46	1.09	3.58	1.29	1.23	242.17	1.91342
P14B12	case group	male	64	yes	no	no	86	3.95	2.13	1.9	3.41	1.08	1.81	1.33	0.66	93	1.93324
P20B05	control group	male	49	yes	no	no	66	6.14	2.28	0.91	4.44	1.24	3.11	1.14	0.92	237.48	1.93485
P6H12	case group	male	44	yes	yes	yes	103	4.11	2.35	2.62	4.39	1.38	3.13	1.24	0.96	277.88	1.96672
P22C01	control group	female	67	no	no	yes	54	6.35	2.44	0.97	3.85	1.57	1.88	1.67	0.84	143.66	1.96966
P14A10	control group	male	69	no	yes	no	80	3.9	1.9	0.84	2.98	1.88	1.84	0.89	0.52	129.2	2.03256
P1E03	case group	male	55	no	no	yes	76	14.81	2.87	2.09	3.75	1.09	3.33	1.47	0.86	423.38	2.03618
P24H10	control group	male	44	yes	yes	no	76	4.51	1.89	1.54	3.47	1.06	2.26	1.19	0.86	558.4	2.11007
P1A11	case group	male	62	no	yes	yes	70	6.15	2.63	0.92	4.77	0.95	3.41	1.17	1.12	139.62	2.14731
P25C07	control group	female	66	no	yes	yes	55.7	6.67	1.9	0.8	3.28	1.62	1.95	1.39	0.69	138.2	2.16246
P22G01	control group	female	71	no	yes	yes	57	5.69	1.81	0.58	3.87	1.45	2.01	1.38	0.46	265.2	2.16892
P6E03	case group	male	47	no	no	no	63	4.62	2.17	3.75	5.56	1.22	3.74	1.26	1.13	219.38	2.20377
P24H08	control group	male	51	no	yes	no	74	4.25	2.11	0.89	3.15	1.02	1.98	1.09	1.03	168.44	2.22277
P14F11	control group	male	39	no	no	no	81	4.59	2.17	0.8	3.16	1.93	1.89	1.09	0.61	115.6	2.23258
P24F04	case group	male	57	no	yes	yes	64	6.41	2.42	1.77	3.04	0.82	2.01	1.04	0.57	305.39	2.23915
P23F01	control group	female	52	no	no	no	74	4.32	2.13	1.06	2.91	1.66	1.61	1.46	0.47	272.42	2.28567
P5H07	case group	male	54	no	yes	no	66	7.03	2.3	3.1	5.72	1.04	4.17	1.14	1.15	307.87	2.34162
P24C05	case group	male	72	no	no	no	73	5.24	3.1	1.78	4.71	1.34	3.42	1.57	1.1	47.98	2.3589
P20F11	control group	female	57	no	yes	yes	54	7.35	2.8	1	4.99	1.51	3.39	1.78	1.02	107.78	2.3755
P24C02	control group	male	71	yes	no	no	63	4.75	2.23	1.37	3.36	1.18	1.7	1.22	0.67	253.15	2.37674
p26d04	case group	female	76	no	yes	no	2.34	9.13	2.34	2.46	6.17	1.15	3.98	1.05	1.46	338.42	2.38759
P2D11	case group	male	46	no	yes	no	82	4.99	2.59	1.72	5.47	0.94	4.07	1.06	1.23	501.22	2.39298
P22F10	case group	female	61	no	yes	yes	51	5.42	2.68	1.74	3.82	0.8	2.36	1.02	0.79	118	2.40151
P1C12	case group	male	60	no	yes	no	154.62	7.52	1.68	1.82	5.45	0.85	3.39	1.25	1.09	403.01	2.41121
P14B08	control group	male	44	no	no	no	98	7.65	2.38	1.67	3.05	1.07	1.69	1.15	0.62	74.34	2.41279
P3G05	case group	male	53	yes	yes	no	96	5.44	2.67	4.32	6.8	1.52	4.4	1.53	1.4	324.85	2.42568
P26E11	case group	female	70	no	yes	yes	54.99	7.81	2.96	0.81	5.6	1.2	3.99	1.22	0.83	85	2.42771
P6E07	case group	male	76	yes	yes	yes	83.54	6.35	2.85	1.3	5.15	0.88	3.59	1.11	1.09	297	2.42937
P20F05	control group	female	59	no	no	no	71	5.02	1.91	1.28	4.74	1.66	3.3	1.46	0.88	538.44	2.43709
P3H11	case group	male	73	no	no	no	84	7.14	2.98	1.05	5.16	1.36	3.95	1.23	1.25	184.41	2.46655
P14G10	control group	male	65	no	yes	no	67.07	5.86	1.2	1.68	3.6	1.92	1.6	1.12	0.76	288.4	2.47404
P14A02	control group	male	45	yes	no	no	54	3.68	2.13	0.79	3.39	1.46	1.69	1.64	0.5	133.9	2.50136
P24H07	control group	male	76	no	yes	no	49	4.93	2.59	0.61	2.81	1.67	1.32	1.38	0.45	571.1	2.54985
P25G10	case group	female	73	no	yes	no	57	10.02	2.25	3.52	4.5	0.94	3.13	1.21	1.09	179.79	2.55638
P24B03	control group	male	67	no	no	no	97	4.1	2.24	1.22	4.46	1.11	3	1.16	1.1	324.29	2.56565
P6B05	case group	male	65	yes	yes	no	97	4.45	2.59	1.48	4.79	0.96	3.43	1.13	1.24	359.4	2.57572
P21C05	case group	female	70	no	yes	no	70	4.27	2.55	2.54	5.39	0.95	3.82	1.23	1.15	114.59	2.58666
P24D02	control group	male	48	no	no	no	63.03	4.9	1.35	1.12	3.11	1.01	1.43	1.07	0.43	51.29	2.61793
P3D01	case group	male	47	yes	no	no	83	3.76	2.46	1.86	6.85	0.89	5.19	1.14	1.54	155.58	2.62326
P26B01	control group	male	62	yes	no	no	52	3.98	2.37	0.81	4.51	1.13	3.18	1.24	0.98	241.77	2.634
P6H10	case group	male	62	no	no	no	126	5.14	2.37	1.78	5.95	1.37	4.51	1.28	1.13	575.31	2.64234
p23G06	case group	male	73	yes	no	no	80	5.21	2.73	6.21	4.65	0.79	1.53	1.07	0.83	609	2.64498
P14D07	control group	male	62	yes	yes	no	63	5.06	2.04	0.75	3.35	1.3	1.81	1.11	0.63	173.3	2.65691
P22A04	case group	female	59	no	no	no	45	4.91	2.42	2.62	3.87	0.93	2.58	1.37	0.84	138.17	2.67252
P26E07	case group	female	45	no	yes	no	63	5.33	2.17	0.78	6.14	1.67	4.47	1.25	1.25	84.58	2.67767
P5G05	case group	male	45	yes	no	no	74	10.06	3.57	2.96	5.42	1.08	3.56	1.25	1.18	85.59	2.68161
P6B01	case group	male	60	yes	yes	no	78.88	4.4	1.84	2.97	6.05	1.15	3.61	1.09	1.19	69.32	2.68395
P5D05	case group	male	69	no	yes	yes	104	5.77	2.76	1.21	5.32	1.17	3.92	1.21	1.25	172.3	2.7063
P26F09	control group	female	73	no	yes	yes	103	5.9	3.09	0.82	4.78	1.41	3.15	1.22	1.17	774.27	2.70933
P21D11	case group	female	68	no	no	no	53	4.51	2.2	0.88	5.13	1.45	3.55	1.51	0.97	153.21	2.71776
P21H03	case group	female	58	no	yes	no	59.44	4.69	2.21	2.32	4.43	0.92	3.14	1.01	0.91	38	2.72449
P2C11	case group	male	45	yes	no	no	62.34	5.68	1.68	1.92	5.85	1.06	4.08	1.11	1.17	61.42	2.72996
P24E07	case group	male	59	yes	no	no	93	4.77	2.13	3.7	4.65	0.94	2.9	1.29	1.09	34.57	2.73027
P1A09	case group	male	41	yes	no	yes	101	9.53	2.87	4.2	4.93	1.11	3.31	1.06	0.85	397.89	2.74573
P4C08	case group	male	43	yes	yes	yes	79	9.62	2.75	5.13	6.68	0.93	4.85	1.23	1.67	279.34	2.74586
P26E06	case group	female	73	no	yes	no	46	8.41	2.46	3.3	5.86	1.35	3.48	1.67	0.86	682.9	2.74986
P23B11	case group	male	62	yes	yes	yes	85	6.76	1.89	2.41	4.06	0.64	2.75	0.85	1.1	75.3	2.75926
P23G08	control group	male	64	no	yes	no	95	4.48	2.23	0.87	2.62	1.07	1.29	1.07	0.53	216.83	2.76672
P26B04	case group	male	67	no	no	no	2.46	4.91	1.21	3.08	1.23	1.07	3.08	11.4	2.7	8.7	2.77687
P21F03	case group	female	62	no	yes	no	60	5	2.6	2.89	5.15	1.18	3.42	1.56	1.14	589.78	2.80643
P23F08	control group	male	48	no	no	no	74	4.61	2.35	1.28	3.93	1.07	2.33	1.23	0.77	827.3	2.81142
P14H02	control group	male	61	no	yes	no	57	4.04	1.79	0.87	3.47	1.01	2.13	0.84	0.65	73.9	2.82018
P26A03	control group	female	72	no	yes	no	82	4.09	1.74	0.78	3.47	1.31	1.87	1.2	0.6	32.23	2.83659
P17E08	control group	female	51	no	yes	no	48	4.63	2.17	0.84	3.33	1.24	1.94	1.34	0.6	251.4	2.85834
P22G11	control group	female	72	no	yes	no	73	4.94	2.22	0.57	3.11	1.24	1.59	1.39	0.55	121.74	2.86879
P24D04	control group	male	45	yes	yes	no	86	5.84	2.09	1.65	3.98	1.23	2.51	1.14	0.73	283.15	2.87141
P26D03	case group	female	76	no	yes	yes	1.77	5.72	1.77	3.04	5.34	0.89	3.49	1.13	1.36	267.5	2.87145
P4B08	case group	male	58	no	yes	yes	97	6.53	1.64	3.12	5.06	1.26	3.46	1.34	1.2	181.72	2.87315
P21F02	case group	female	57	no	yes	no	66	7.59	1.91	1.73	6.23	1.08	4.9	1.38	1.33	147.92	2.87373
P21D05	case group	female	74	no	yes	yes	59	5.4	2.77	1.95	6	1.44	4.17	1.56	1.1	112.31	2.89826
P22H07	control group	female	59	no	no	no	75	4.31	2.68	0.72	3.51	1.13	2.14	1.12	0.87	406.38	2.94035
P11C11	case group	male	52	yes	no	no	75	5.31	2.42	4.57	5.08	1.12	3.11	1.24	1.53	147.77	2.95606
P15F02	control group	female	80	yes	yes	no	45	5.55	2.61	1.09	3.44	1.47	1.65	1.35	0.57	101.5	2.97984
P15G12	case group	female	61	yes	no	no	58	6.04	2.69	2.05	3.33	1.25	1.49	1.53	1.07	11.48	3.00282
P23D06	case group	male	73	no	yes	yes	101.18	9.73	2.3	2.17	3.96	0.82	2.76	1.3	0.98	328.34	3.00756
P24G09	case group	male	56	no	no	no	65	5.22	2.46	2.34	4.93	0.84	3.3	1.14	1.13	70.17	3.06834
P21A01	case group	female	68	no	yes	no	89	7.35	2.24	1.52	5.59	1.47	4.63	1.68	1.27	165.89	3.08149
P14F04	control group	male	45	yes	yes	no	56	4.66	1.77	1.24	3.54	1.58	2.43	0.84	0.76	141.4	3.08795
P1E02	case group	male	67	no	no	yes	91	6.49	2.28	2.05	4.47	1.02	3.32	1	1.01	232.6	3.08961
P5G02	case group	male	49	yes	yes	no	68	3.41	1.92	3.67	4.98	0.85	4.01	1.02	1.1	186.9	3.09221
P24E05	case group	male	74	no	yes	yes	85.9	11.32	2.4	2.99	4.32	0.87	2.33	0.89	0.9	65.73	3.0969
P6A08	control group	male	48	yes	no	no	96.4	5.97	1.75	1.67	4.45	1.02	3.17	1.41	1.02	112.69	3.12514
P6F08	control group	male	78	yes	no	no	109	6.22	2.26	1.34	4.53	1.25	3.23	1.12	0.95	285.51	3.12741
P4E12	case group	male	52	no	no	no	56	4.94	2.42	2.19	4.95	1.08	3.44	1.29	1.03	243.12	3.14385
P26C10	case group	female	58	no	yes	no	55	5.15	2.84	2.15	0.14	1.33	4.41	1.44	1.46	21.3	3.19625
P14H08	case group	male	56	no	no	no	88	4.21	2.03	2.31	4.45	0.69	2.74	0.74	0.97	92.1	3.21305
P21B11	case group	female	74	no	yes	yes	74	10.44	2.36	1.66	5.05	0.97	3.67	1.32	1.13	805.43	3.2336
P6G04	case group	male	76	yes	yes	no	91	4.13	1.83	2.19	4.35	1.06	3.19	0.96	0.97	152.85	3.24496
P25E03	control group	female	68	no	no	no	87	4.15	2.26	0.91	3.01	1.31	1.87	1.2	0.66	148.86	3.26102
P14B09	control group	male	64	yes	no	no	83	5.15	1.04	1.11	2.78	1.68	1.61	1.24	0.7	156	3.27408
P11D08	case group	male	64	no	yes		82.31	17.85	1.76	0.73	5.91	1.07	4.8	1.52	1.29	350.99	3.27774
P23A06	control group	male	76	yes	yes	no	66	4.68	2.26	0.56	2.65	1.18	1.16	1.09	0.45	205.06	3.2797
P6A12	control group	male	61	yes	yes	no	65.14	5.15	2.4	1.52	4.32	1.93	3.23	0.95	0.93	433.45	3.29376
P6D05	case group	male	51	yes	yes	no	60	7.95	2.13	4.81	4.93	0.83	3.61	1.13	0.82	859.56	3.32542
P4H12	case group	male	33	yes	no	no	82	4.21	2.45	1.12	5.02	0.93	3.42	0.98	1.03	857.28	3.35414
P24G08	control group	male	47	no	yes	no	70	4.76	2.55	1.64	3.61	1.73	2.59	1.05	0.76	103.05	3.36465
P26A04	control group	male	39	yes	no	no	83	3.87	2.39	0.91	3.73	1.3	2.04	1.29	0.58	29.48	3.36669
P15F07	control group	female	62	no	no	no	47	4.58	2.46	0.84	3.88	1.54	1.87	1.42	0.63	176.6	3.36886
P3H12	case group	male	68	yes	yes	no	115	4.22	2.54	2.19	3.46	1.07	1.85	1.31	0.68	88.78	3.3738
P21C09	case group	female	83	no	yes	yes	62.82	12.32	1.97	5.32	5.93	0.71	3.42	1.12	1.12	136.27	3.38237
P3D09	case group	male	55	no	yes	no	107	5.8	2.71	1.96	7.87	1.01	5.92	1.04	1.78	87.01	3.40151
P26D05	case group	female	51	no	yes	no	54	4.42	2.72	1.76	5.29	1.12	4.02	1.15	1.28	643.78	3.4149
P24D03	control group	male	61	no	no	no	81	4.52	2.24	0.91	3.13	1.35	1.69	1.36	0.48	20.51	3.41738
P20F04	case group	female	54	no	yes	yes	72	9.31	2.8	1.42	5.88	1.78	3.64	1.26	1.07	25.5	3.42817
P21A02	case group	female	62	no	no	no	65	7.92	3.42	2.54	5.95	1.52	3.71	1.83	1.13	92.98	3.435
P21E11	control group	female	55	no	yes	yes	60.67	4.4	2.59	1.09	5.04	1.67	3.17	1.37	0.82	76	3.45374
P24C08	case group	male	73	no	no	yes	109.7	4.49	2.49	2.3	4.19	1.02	2.32	1.33	0.64	85	3.4748
P6C09	case group	male	53	yes	yes	no	76	4.79	1.83	2.67	4.79	0.75	3.25	0.94	1.16	1426.3	3.48801
P20F10	case group	female	68	no	yes	no	56.2	8.17	1.8	1.25	5.55	1.41	3.31	1.5	1.05	64.8	3.49381
P5F05	case group	male	71	no	yes	no	80	9.58	2.62	2.58	4.06	0.85	3.6	1.27	0.77	108.25	3.53123
P24A02	case group	male	57	yes	no	yes	78	6.3	2.9	1.34	5	1.13	3.4	1.25	1.08	73.94	3.54248
P22C03	control group	female	56	no	no	no	71	4.89	2.38	1.22	3.56	1.17	2.52	1.32	0.798	76.55	3.55264
P14H05	control group	male	39	no	no	no	83	3.84	2.3	1.04	3.28	1.07	2.11	1.08	0.71	94.6	3.56043
P23H03	control group	male	67	no	no	no	68	4.14	2.13	1.23	3.26	1.19	1.72	1.4	0.57	221.73	3.61473
P21H10	case group	female	61	no	yes	yes	60.39	15.98	3.23	1.19	4.95	0.99	3.63	1.35	0.95	78	3.62428
P24F11	case group	male	63	no	no	no	70.75	6.59	2.88	2.74	2.84	0.96	1.18	1.14	0.45	90.68	3.62978
P5H04	control group	male	53	yes	no	no	77.34	9.64	1.74	1.6	4.58	1.36	3.13	1.34	0.85	284.8	3.65803
P2F09	case group	male	58	yes	yes	yes	81	6.2	2.42	2.2	4.53	0.98	3.2	1.13	1.03	153.6	3.78484
P6E02	case group	male	44	yes	no	no	80	4.62	2.29	4.82	5.58	1	3.9	0.76	0.9	634.81	3.84494
P6B10	control group	male	41	yes	no	no	68	5.42	2.13	1.59	4.61	1.84	3.26	1.39	1.32	49.9	3.86723
P14B11	case group	male	63	no	yes	yes	73	4.35	1.97	1.94	3.6	0.7	2.09	1.06	0.82	460.6	3.87755
P5G06	control group	male	70	no	no	no	77	4.31	2.38	1.25	4.57	1.04	3.24	1.06	1.29	680.1	3.91184
P6H02	case group	male	49	yes	no	no	64.87	5.74	1.37	1.36	5.66	1.63	4.13	1.43	1.17	363.5	3.92079
P20G11	case group	female	52	no	yes	no	64	5.76	2.68	1.68	6.42	1.1	4.59	1.36	1.72	123.7	4.01903
P23F02	control group	male	42	yes	no	no	81	4.57	2.38	1.29	3.75	1.36	2.57	1.27	0.81	169.37	4.06331
P15E03	control group	female	65	no	yes	no	58	4.56	2.45	0.74	2.95	1.4	1.25	1.47	0.41	71.4	4.15751
P21A05	case group	female	66	no	yes	no	65.57	5.14	1.91	1.32	4.57	1.28	3.52	1.07	0.93	165.32	4.20674
P11D07	case group	male	67	no	yes	no	63.15	5.72	1.45	1.04	4.89	0.92	3.49	1.07	0.99	457.8	4.33265
P6A11	case group	male	47	yes	yes	no	67	7.39	2.35	2.8	5.29	0.84	4.21	0.89	1.27	234.49	4.34245
P23F03	case group	male	67	no	yes	yes	87	4.49	1.99	2.74	3.64	0.98	2.66	1.13	0.77	94.5	4.36876
P24A11	control group	male	51	yes	yes	no	72	5.59	2.3	1.03	3.22	1.6	1.62	1.53	0.62	126.71	4.37658
P23C12	control group	male	31	no	no	no	76.84	5.04	2.39	1.4	2.14	1.53	1	0.62	0.44	68.84	4.43321
P5B11	case group	male	56	no	no	no	66	4.97	2.23	1.49	5.24	1	4	1.02	1.18	752.89	5.26872
P4F08	control group	male	44	yes	no	yes	56.2	4.09	2.15	1.54	4.62	1.02	3.11	1.19	0.98	244.36	5.49853
	control group	male	46	no	yes	no	54	4.65	2.02	1.59	3.66	1.09	2.09	1.23	1	107.75	0.703635
