# Supplementary material for: Genetic analysis of DNA methylation in dyslipidemia: a case-control study
Source: PeerJ. 2022 Dec 19;10:e14590. doi: 10.7717/peerj.14590 (PMC9774006; doi:10.7717/peerj.14590)
Supplement: Supplemental Information 4 [file peerj-10-14590-s004.xlsx]

## Sheet: Haplotype
Target	Haplotype	Depth	P11C11	P11D05	P11D07	P11D08	P14A02	P14A08	P14A10	P14B08	P14B09	P14B11	P14B12	P14D07	P14F04	P14F11	P14G06	P14G10	P14G12	P14H02	P14H05	P14H08	P14H09	P15C09	P15E02	P15E03	P15E10	P15F02	P15F07	P15G02	P15G12	P17E08	P1A09	P1A11	P1B06	P1C01	P1C12	P1D10	P1E02	P1E03	P1H09	P20B05	P20D12	P20E07	P20F04	P20F05	P20F10	P20F11	P20G11
AMFR_1_	ttttttttttttttttttttttttt	73859	0.830325	0.854839	0.796562	0.797403	0.845745	0.811881	0.822323	0.835777	0.797521	0.825364	0.778234	0.8117	0.763916	0.86019	0.818777	0.817797	0.839836	0.829268	0.851759	0.837709	0.847262	0.87013	0.793249	0.784574	0.791304	0.831818	0.85595	0.811802	0.812379	0.867816	0.79321	0.835897	0.81388	0.806517	0.803398	0.859813	0.826446	0.815242	0.833703	0.803738	0.793103	0.813131	0.806026	0.825397	0.801193	0.784906	0.777132
AMFR_1_	ttttttttttttttttttttttctt	821	0.0108303	0.0100806	0.00573066	0.00519481	0.00177305	0	0.00911162	0.0058651	0.00619835	0.00831601	0.0143737	0.0164534	0.00575816	0.00473934	0.0196507	0.0148305	0.00205339	0.010453	0.0125628	0.0143198	0.00864553	0.0113636	0.021097	0.00531915	0.00869565	0.0113636	0.00835073	0.0175439	0.0232108	0.01341	0.00925926	0.0025641	0.0157729	0.00407332	0.00728155	0.0046729	0	0.0161663	0.0199557	0.011215	0.0172414	0.013468	0.0169492	0.00529101	0.00795229	0.00754717	0.0135659
AMFR_1_	tttttttttttttttttttttcttt	751	0.00361011	0.00201613	0.00573066	0.0155844	0.0035461	0.00990099	0.00911162	0.0058651	0.0165289	0.02079	0.0184805	0.00914077	0.0211132	0.00236967	0.00436681	0.0127119	0.00616016	0.0139373	0.0150754	0.00477327	0.00288184	0.00811688	0.00421941	0.0106383	0.00869565	0.00454545	0.00208768	0.00637959	0	0.00383142	0.00308642	0.00512821	0.00315457	0.00407332	0.0121359	0.00700935	0.00550964	0.00461894	0.00665188	0.00560748	0.00246305	0.0117845	0.0188324	0.00705467	0.00198807	0.0132075	0.00387597
AMFR_1_	ttttttttttttctttttttttttt	743	0.00180505	0.00201613	0.00859599	0.00779221	0.00531915	0.00660066	0.00911162	0	0.00206612	0.00831601	0.00410678	0.0109689	0.0153551	0.00947867	0.0131004	0.00211864	0.00821355	0.010453	0.0125628	0.00954654	0.00288184	0.00487013	0	0.018617	0.00695652	0.00681818	0.00835073	0.0143541	0.0116054	0.00383142	0.00925926	0.00512821	0.0126183	0	0.00485437	0.0046729	0.0137741	0.00461894	0.0110865	0.0130841	0.0123153	0.003367	0.00188324	0.00881834	0.00994036	0.0150943	0.0174419
AMFR_1_	tttttttttttttttttttttttct	720	0.00902527	0.00806452	0	0.00779221	0.00886525	0.00330033	0.0022779	0.0058651	0.00206612	0.00831601	0.0164271	0.0146252	0.00767754	0.00236967	0.00873362	0.00635593	0.00821355	0.0139373	0.00251256	0.00477327	0.00864553	0.00487013	0.0168776	0.00531915	0.0121739	0.00681818	0.00626305	0.0111643	0	0.00766284	0.0154321	0.0102564	0.00630915	0.00203666	0.00970874	0.0046729	0.00550964	0.00923788	0.0155211	0.00560748	0.0172414	0.003367	0.0188324	0.00529101	0.00596421	0.00566038	0.00968992
AMFR_1_	tttttttttttttttttttcttttt	672	0.00541516	0.00403226	0.017192	0.00519481	0.0035461	0.00660066	0.00683371	0.0117302	0.0165289	0.012474	0.0164271	0.00731261	0	0.00473934	0.010917	0.00423729	0.00616016	0.0174216	0.00502513	0.00477327	0	0.00324675	0.00421941	0.00531915	0.00521739	0.00909091	0.0104384	0.00797448	0.00967118	0.00766284	0.0123457	0.0153846	0.00630915	0	0.00728155	0.0116822	0	0.00923788	0.00443459	0.00747664	0.00246305	0.00673401	0.00753296	0.00881834	0.0119284	0.00377358	0.00775194
AMFR_1_	tttttttttcttttttttttttttt	631	0.00541516	0.0120968	0	0.00779221	0.0124113	0	0.00683371	0.0058651	0.00826446	0.00831601	0.00821355	0.0127971	0.0115163	0.00473934	0.00218341	0.0105932	0.00616016	0	0.0100503	0.00477327	0.00864553	0.00487013	0.00421941	0.0212766	0.00521739	0.00681818	0.00835073	0.00478469	0.00386847	0.00574713	0.00617284	0.0102564	0.00630915	0.0101833	0.0121359	0.0046729	0.00550964	0.00461894	0.00221729	0.0205607	0.0147783	0.0218855	0	0.00529101	0.00397614	0.00188679	0.00968992
AMFR_1_	tttttttttttttttcttttttttt	623	0.00722022	0.00403226	0.0143266	0.0155844	0.0035461	0.00990099	0.0022779	0.0058651	0.0144628	0.00623701	0.0123203	0.00914077	0.00959693	0	0.00655022	0.00847458	0.00205339	0	0.00502513	0.0071599	0.00288184	0.00487013	0.00421941	0.00265957	0.00869565	0.0113636	0.00835073	0.00797448	0.00967118	0.00574713	0.00617284	0.00512821	0.00315457	0.00610998	0.00728155	0.0046729	0.0165289	0.00692841	0.00221729	0.00934579	0.0123153	0.00505051	0.00188324	0.00176367	0.00795229	0.00943396	0.0116279
AMFR_1_	ctttttttttttttttttttttttt	616	0.00361011	0.00604839	0.00859599	0.0025974	0.00886525	0.0165017	0.0022779	0.0175953	0.00413223	0.004158	0.00410678	0.00548446	0.0172745	0	0.00218341	0.00211864	0.00205339	0.0174216	0	0.00954654	0.0144092	0.00974026	0.00421941	0.0106383	0.00869565	0.00454545	0.00208768	0.0127592	0.00193424	0.00383142	0.00925926	0	0.00315457	0.0142566	0	0.0046729	0.00275482	0.00461894	0.00443459	0.00186916	0.00246305	0.00841751	0.0094162	0.0123457	0.0159046	0	0.00193798
AMFR_1_	ttttttttttttttctttttttttt	615	0.00722022	0.00604839	0.0143266	0.0103896	0.0035461	0.00330033	0.00911162	0.00293255	0.0144628	0.00623701	0.00821355	0.00914077	0.0191939	0.00473934	0.00436681	0.0105932	0.00821355	0.00348432	0.00502513	0.00238663	0.00864553	0.00811688	0.00843882	0.00531915	0.00869565	0.00227273	0.0104384	0.00956938	0.0154739	0	0.00617284	0	0.00946372	0.00814664	0.00728155	0.0163551	0.00550964	0.00923788	0	0.0186916	0.00738916	0.003367	0.00753296	0.00352734	0.00397614	0	0.00968992
AMFR_1_	ttttttctttttttttttttttttt	614	0.0108303	0.00201613	0.00286533	0.00779221	0.00886525	0.0231023	0.0136674	0.0058651	0.0123967	0.00831601	0.00616016	0.00365631	0.0115163	0.007109	0.010917	0.00635593	0.0123203	0.010453	0.00753769	0.00238663	0.00288184	0.00324675	0.00843882	0.00797872	0.00869565	0.00909091	0.00835073	0.0015949	0.00773694	0.00574713	0.00617284	0.00512821	0.0157729	0.00203666	0.00242718	0.0140187	0.00550964	0.00461894	0.00665188	0.0149533	0.00985222	0.010101	0.0131827	0.0123457	0.00596421	0.0188679	0.0116279
AMFR_1_	ttttttttttttttttttctttttt	585	0.00541516	0.00604839	0.0114613	0.00519481	0.0106383	0.00660066	0.00911162	0.00293255	0.0206612	0.00623701	0.0143737	0.00182815	0.0172745	0.0165877	0.010917	0.00635593	0.00616016	0.010453	0.00753769	0.0071599	0.00288184	0.00811688	0.00421941	0.00797872	0.00695652	0	0.00417537	0.00637959	0.00386847	0.00383142	0.0154321	0	0	0.00407332	0.00970874	0	0.00550964	0.0161663	0.0177384	0.00373832	0.0123153	0	0.00376648	0.00881834	0.00795229	0.0113208	0.0116279
AMFR_1_	ttttttttttttttttctttttttt	584	0.00722022	0.0100806	0.00573066	0.00519481	0.00177305	0	0.00911162	0.00293255	0.00413223	0.014553	0.00616016	0.0146252	0.00191939	0.007109	0.00436681	0.00423729	0.00410678	0	0	0.00238663	0.00576369	0.00162338	0.00843882	0.0132979	0.0104348	0.00227273	0.00417537	0.00318979	0.00773694	0	0.00925926	0.00512821	0.00315457	0.0285132	0.00485437	0.00934579	0.00826446	0.0115473	0.00443459	0	0.00492611	0.00673401	0.0094162	0.00705467	0.00397614	0.0113208	0.00581395
AMFR_1_	tttttttttttttcttttttttttt	579	0.00722022	0.00604839	0.00286533	0.0103896	0.0106383	0.0165017	0.0022779	0.00879765	0.00413223	0.002079	0.00616016	0	0.00575816	0	0.00655022	0	0.0143737	0.00348432	0	0.00477327	0.00576369	0	0.00421941	0.00265957	0.00521739	0	0.00417537	0.00478469	0.00193424	0.00383142	0	0.0102564	0	0.00814664	0.00728155	0.0046729	0.0110193	0.00461894	0.00443459	0.00373832	0.0147783	0.00505051	0.00564972	0.00176367	0.0178926	0.00377358	0.00581395
AMFR_1_	ttttttttttttttttttttctttt	573	0.00361011	0.00604839	0.00573066	0	0.0106383	0.00660066	0.0113895	0.0117302	0.00206612	0	0.00205339	0.00365631	0.00191939	0.00473934	0.00655022	0.00423729	0.00410678	0.010453	0.00251256	0.0143198	0.00576369	0.00649351	0.00843882	0.00531915	0.00695652	0	0.00626305	0.00478469	0.00386847	0.00383142	0.0185185	0.00769231	0.00630915	0.00407332	0.0145631	0.00934579	0.0165289	0.00692841	0.00886918	0.00747664	0	0.00505051	0.0188324	0.00881834	0.0139165	0.00754717	0.00193798
AMFR_1_	tttcttttttttttttttttttttt	571	0.00361011	0.00403226	0.0114613	0.00519481	0.0159574	0.0132013	0.0022779	0.0234604	0.00206612	0.004158	0.00410678	0.00365631	0.00959693	0.007109	0.00436681	0.00847458	0.00410678	0.00348432	0.00251256	0.00954654	0.00288184	0.00974026	0.00843882	0.0132979	0.0191304	0.0159091	0.00417537	0.00637959	0.00773694	0.00574713	0.00308642	0.0179487	0.00315457	0.00203666	0.0121359	0.0046729	0	0	0.00221729	0.00560748	0.00492611	0.00841751	0	0.00352734	0.00795229	0.00943396	0.00193798
AMFR_1_	ttttctttttttttttttttttttt	533	0.00541516	0.00403226	0.00573066	0	0.00177305	0.00660066	0.00683371	0.00879765	0.00413223	0.00623701	0.0102669	0.00914077	0.0134357	0	0.00655022	0.00211864	0.00410678	0	0	0.00954654	0	0.00162338	0.0168776	0.00531915	0.00521739	0.00909091	0	0.00478469	0	0.00191571	0.00925926	0.0025641	0.00315457	0.0183299	0.00242718	0.00233645	0.00826446	0.00692841	0	0.00186916	0.00738916	0.00673401	0.00753296	0.00529101	0.00397614	0.00943396	0.00581395
AMFR_1_	ttctttttttttttttttttttttt	526	0.00361011	0.00806452	0.00286533	0.00519481	0.00177305	0.00990099	0.00911162	0	0.00413223	0.00623701	0	0	0.00383877	0	0.00436681	0.0127119	0.00410678	0.00696864	0.00753769	0.0071599	0.0172911	0.00649351	0	0.0106383	0.00695652	0.00909091	0.00626305	0.00478469	0.0116054	0.00766284	0.0123457	0.0025641	0.022082	0.0162933	0	0	0	0.00230947	0.00221729	0.00186916	0.00246305	0.00505051	0.00564972	0.00881834	0.00994036	0.00188679	0.00775194
AMFR_1_	tttttcttttttttttttttttttt	525	0.00722022	0.00604839	0.00859599	0.0025974	0.00177305	0.00660066	0.00683371	0.0058651	0.0123967	0.00831601	0.00821355	0.00548446	0.00383877	0.007109	0.00218341	0.00635593	0.00616016	0.00348432	0	0.00238663	0.00288184	0.00487013	0.00421941	0	0.00695652	0.00454545	0.00417537	0.00956938	0.00193424	0.00383142	0.00308642	0	0.00315457	0.00407332	0.00485437	0.00233645	0	0	0.00443459	0	0.00492611	0.0016835	0	0.00529101	0.00596421	0.0150943	0.00193798
AMFR_1_	ttttttttttctttttttttttttt	502	0	0.00201613	0.017192	0	0.00531915	0.00330033	0.0113895	0.0117302	0.00413223	0.002079	0.00616016	0.0109689	0.0115163	0.0165877	0.00218341	0.00211864	0.00410678	0.00348432	0.00753769	0.00238663	0.00576369	0.00162338	0.0168776	0	0.00521739	0.00227273	0	0	0.00193424	0.00766284	0.00308642	0.00512821	0.00630915	0.00407332	0.00242718	0.00233645	0.00550964	0.0115473	0.00665188	0.00747664	0.00985222	0.00841751	0.00564972	0.0123457	0.00198807	0.00377358	0.00968992
AMFR_1_	ttttttttctttttttttttttttt	492	0.0126354	0.00201613	0.00859599	0.012987	0.00177305	0.00330033	0.0022779	0.00293255	0.00413223	0.002079	0.00410678	0.00182815	0.00575816	0	0.00873362	0.00423729	0	0.00348432	0.00502513	0.0071599	0.00576369	0.00162338	0.0126582	0.00797872	0.00695652	0.00909091	0.00835073	0.00478469	0.00386847	0.00383142	0.0123457	0.0102564	0.00630915	0.00407332	0.0121359	0	0.00550964	0.00461894	0.0110865	0.00560748	0.00246305	0.00673401	0.0112994	0.00176367	0.00198807	0.00566038	0.00775194
AMFR_1_	ttttttttttttttttttttttttc	491	0.0126354	0.00604839	0	0.00779221	0.0035461	0.00330033	0.00683371	0.00293255	0.00413223	0.004158	0.00205339	0.00548446	0.00191939	0.00236967	0.00655022	0.0105932	0.00410678	0	0.00502513	0.0071599	0	0.00649351	0.00843882	0.00797872	0	0.00454545	0.00208768	0.00956938	0.00967118	0.00574713	0	0.0025641	0	0.00203666	0.0121359	0.0046729	0.0137741	0.00923788	0.00221729	0.00747664	0.00738916	0.010101	0.00188324	0.00705467	0.00795229	0.00754717	0.00775194
AMFR_1_	tttttttttttcttttttttttttt	478	0.00541516	0.00604839	0.0114613	0.0233766	0.0035461	0	0.0022779	0	0.00206612	0.00623701	0.0123203	0.00182815	0.00575816	0.00236967	0.00218341	0.00423729	0.0102669	0.010453	0.00753769	0	0.00864553	0	0.00843882	0.00797872	0.00695652	0.00227273	0	0.00956938	0.00193424	0.00574713	0.00617284	0.00769231	0	0.00610998	0.00485437	0.0046729	0.00826446	0.00230947	0.00443459	0.00373832	0.0123153	0.003367	0.00188324	0	0.00397614	0.00943396	0.00387597
AMFR_1_	tttttttttttttttttcttttttt	429	0.00541516	0.00403226	0.00859599	0.0103896	0.00177305	0.00660066	0.00911162	0.00293255	0	0	0.00821355	0.00548446	0.00575816	0.00947867	0.00655022	0.00423729	0	0.00348432	0	0.00477327	0.00864553	0.00162338	0	0.00797872	0.00695652	0.00909091	0.00208768	0.0015949	0.0174081	0.00383142	0.00308642	0.00769231	0.00315457	0.0101833	0.00970874	0.00700935	0.00275482	0.00461894	0.00221729	0.00934579	0.00246305	0.003367	0	0.00881834	0.00596421	0.00943396	0.0116279
AMFR_1_	tcttttttttttttttttttttttt	378	0.00180505	0.00201613	0.00573066	0.0025974	0.0035461	0.00330033	0.0022779	0	0.00413223	0	0.00205339	0.00182815	0.00191939	0	0.010917	0.00423729	0.0102669	0.00348432	0.00251256	0.0071599	0.00288184	0	0	0.00797872	0.00521739	0.00227273	0.00208768	0	0.00193424	0.00191571	0.00617284	0.0025641	0.00946372	0	0.00728155	0.00233645	0	0.00230947	0.00886918	0.00560748	0.00492611	0.00841751	0.00564972	0.00352734	0	0.00566038	0.00193798
AMFR_1_	tttttttcttttttttttttttttt	369	0.00361011	0.00201613	0.00859599	0.0103896	0.00531915	0.00660066	0.0022779	0	0.00619835	0.012474	0.00205339	0.00548446	0.0115163	0.00236967	0.00218341	0.00635593	0.00821355	0	0.0100503	0.0071599	0.00288184	0	0.0126582	0.00265957	0.00347826	0.00454545	0.00417537	0.0015949	0.00386847	0.00191571	0	0.0025641	0.00630915	0.00203666	0.00242718	0	0.00826446	0	0.00443459	0.00560748	0.00738916	0.00673401	0.00188324	0.00176367	0.00795229	0.00754717	0.00775194
AMFR_2	ttttttttttttttttttttttttttttttttttt	464	0.571429	0	0	0.8	1		0	1	1	0.5	0.555556	1	1			0.875	1	1	0	1		1	1	1	1	0.625	1	0.857143		1	0.666667	1		1	1			1	0.75	1		1	0.5	0.666667	1	0.875	0.5
AMFR_2	tttttttttttttttttttttttcttttttttttt	14	0	0	0	0.2	0		0	0	0	0	0	0	0			0	0	0	0	0		0	0	0	0	0.125	0	0		0	0	0		0	0			0	0	0		0	0	0	0	0	0
AMFR_2	ttttttttttttttttttttctttttttttttttt	11	0.0714286	0	0	0	0		0	0	0	0	0.111111	0	0			0	0	0	0	0		0	0	0	0	0	0	0		0	0	0		0	0			0	0	0		0	0	0	0	0	0
AMFR_2	ttttttttttttttttttttttctttttttttttt	9	0	0	0	0	0		0	0	0	0	0	0	0			0	0	0	0	0		0	0	0	0	0	0	0		0	0	0		0	0			0	0	0		0	0	0	0	0	0
AMFR_2	tttttttttttttttttttttttttttttttttct	9	0	0	0	0	0		0	0	0	0	0	0	0			0	0	0	0.5	0		0	0	0	0	0	0	0		0	0	0		0	0			0	0	0		0	0	0	0	0	0
AMFR_2	tttttttttttttttttttcttttttttttttttt	8	0	0	0	0	0		0	0	0	0	0	0	0			0	0	0	0	0		0	0	0	0	0	0	0		0	0	0		0	0			0	0	0		0	0	0	0	0	0
AMFR_2	ttttttttttttttttttttttttctttttttttt	8	0	0	0	0	0		0	0	0	0	0	0	0			0	0	0	0	0		0	0	0	0	0	0	0		0	0	0		0	0			0	0	0		0	0	0.333333	0	0	0.5
AMFR_2	ttttttttttttttttttttttttttttttctttt	7	0.0714286	0	1	0	0		0	0	0	0	0	0	0			0	0	0	0	0		0	0	0	0	0	0	0		0	0.333333	0		0	0			0	0	0		0	0	0	0	0	0
AMFR_2	tttttttttttttttttttttcttttttttttttt	6	0	0	0	0	0		0	0	0	0	0	0	0			0	0	0	0.5	0		0	0	0	0	0	0	0		0	0	0		0	0			0	0	0		0	0	0	0	0	0
AMFR_2	ttttctttttttttttttttttttttttttttttt	5	0	0	0	0	0		0	0	0	0	0	0	0			0	0	0	0	0		0	0	0	0	0	0	0		0	0	0		0	0			0	0	0		0	0	0	0	0	0
AMFR_2	ttttttttttttttttttctttttttttttttttt	5	0	0	0	0	0		0	0	0	0	0	0	0			0	0	0	0	0		0	0	0	0	0	0	0		0	0	0		0	0			0	0	0		0	0	0	0	0.125	0
AMFR_2	ttttttttttttttttttttttttttctttttttt	5	0	0	0	0	0		0	0	0	0	0	0	0			0	0	0	0	0		0	0	0	0	0	0	0		0	0	0		0	0			0	0	0		0	0	0	0	0	0
AMFR_2	tttttttttttttttttttttttttttttcttttt	5	0.0714286	0	0	0	0		0	0	0	0	0	0	0			0	0	0	0	0		0	0	0	0	0	0	0		0	0	0		0	0			0	0.25	0		0	0	0	0	0	0
AMFR_2	ttttttttttttttttttttttttttttttttctt	5	0	0	0	0	0		0	0	0	0	0	0	0			0.125	0	0	0	0		0	0	0	0	0	0	0		0	0	0		0	0			0	0	0		0	0	0	0	0	0
AMFR_2	ttttttttttttctttttttttttttttttttttt	4	0	0	0	0	0		0	0	0	0	0	0	0			0	0	0	0	0		0	0	0	0	0	0	0		0	0	0		0	0			0	0	0		0	0	0	0	0	0
AMFR_2	ttttttttttttttttctttttttttttttttttt	4	0	0	0	0	0		0	0	0	0	0	0	0			0	0	0	0	0		0	0	0	0	0.125	0	0		0	0	0		0	0			0	0	0		0	0	0	0	0	0
AMFR_2	ttttttttttttttttttttttttttttctttttt	4	0.0714286	0	0	0	0		0	0	0	0	0	0	0			0	0	0	0	0		0	0	0	0	0	0	0		0	0	0		0	0			0	0	0		0	0	0	0	0	0
AMFR_2	tttttttttttttttttttttttttttttttcttt	4	0	0	0	0	0		0	0	0	0	0	0	0			0	0	0	0	0		0	0	0	0	0	0	0		0	0	0		0	0			0	0	0		0	0	0	0	0	0
AMFR_2	tttttttttttttttttttttttttcttttttttt	4	0	0	0	0	0		1	0	0	0	0	0	0			0	0	0	0	0		0	0	0	0	0	0	0		0	0	0		0	0			0	0	0		0	0	0	0	0	0
AMFR_2	tttttttttttttttcttttttttttttttttttt	4	0	0	0	0	0		0	0	0	0	0	0	0			0	0	0	0	0		0	0	0	0	0	0	0		0	0	0		0	0			0	0	0		0	0	0	0	0	0
AMFR_2	ttttttctttttttttttttttttttttttttttt	4	0	0	0	0	0		0	0	0	0	0	0	0			0	0	0	0	0		0	0	0	0	0	0	0		0	0	0		0	0			0	0	0		0	0.5	0	0	0	0
AMFR_2	tttttttttttttttttcttttttttttttttttt	4	0	0	0	0	0		0	0	0	0	0	0	0			0	0	0	0	0		0	0	0	0	0	0	0		0	0	0		0	0			0	0	0		0	0	0	0	0	0
AMFR_2	tttttttttcttttttttttttttttttttttttt	3	0	0	0	0	0		0	0	0	0	0	0	0			0	0	0	0	0		0	0	0	0	0	0	0		0	0	0		0	0			0	0	0		0	0	0	0	0	0
AMFR_2	ttttttttttttttctttttttttttttttttttt	3	0	0	0	0	0		0	0	0	0	0	0	0			0	0	0	0	0		0	0	0	0	0	0	0		0	0	0		0	0			0	0	0		0	0	0	0	0	0
AMFR_2	tttcttttttttttttttttttttttttttttttt	3	0	0	0	0	0		0	0	0	0	0	0	0			0	0	0	0	0		0	0	0	0	0	0	0.142857		0	0	0		0	0			0	0	0		0	0	0	0	0	0
AMFR_2	ctttttttttttttttttttttttttttttttttt	2	0	0	0	0	0		0	0	0	0	0	0	0			0	0	0	0	0		0	0	0	0	0	0	0		0	0	0		0	0			0	0	0		0	0	0	0	0	0
AMFR_2	tttctttttttttttttttcttttttttttttttt	2	0	0	0	0	0		0	0	0	0	0	0	0			0	0	0	0	0		0	0	0	0	0	0	0		0	0	0		0	0			0	0	0		0	0	0	0	0	0
AMFR_2	ttttttttttttttttttttttttttttttttttc	2	0	0	0	0	0		0	0	0	0	0	0	0			0	0	0	0	0		0	0	0	0	0	0	0		0	0	0		0	0			0	0	0		0	0	0	0	0	0
AMFR_2	tttttttttttcttttttttttttttttttttttt	2	0	0	0	0	0		0	0	0	0	0	0	0			0	0	0	0	0		0	0	0	0	0	0	0		0	0	0		0	0			0	0	0		0	0	0	0	0	0
AMFR_2	ttttttttctttttttttttttttttttttttttt	2	0	0	0	0	0		0	0	0	0.5	0	0	0			0	0	0	0	0		0	0	0	0	0	0	0		0	0	0		0	0			0	0	0		0	0	0	0	0	0
AMFR_2	ttttttttttttttcttttttcttttttttttttt	1	0	0	0	0	0		0	0	0	0	0	0	0			0	0	0	0	0		0	0	0	0	0	0	0		0	0	0		0	0			0	0	0		0	0	0	0	0	0
AMFR_2	tttttttttttttttttttttctttttttttttct	1	0	0	0	0	0		0	0	0	0	0	0	0			0	0	0	0	0		0	0	0	0	0	0	0		0	0	0		0	0			0	0	0		0	0	0	0	0	0
AMFR_2	ttttttttttttttttttttttttctctttttttt	1	0	0	0	0	0		0	0	0	0	0	0	0			0	0	0	0	0		0	0	0	0	0	0	0		0	0	0		0	0			0	0	0		0	0	0	0	0	0
AMFR_2	ttttttttttttttttccctctctctttttttttt	1	0	0	0	0	0		0	0	0	0	0	0	0			0	0	0	0	0		0	0	0	0	0	0	0		0	0	0		0	0			0	0	0		0	0	0	0	0	0
AMFR_2	ttctttttttttttttttttttttttttttttttt	1	0	0	0	0	0		0	0	0	0	0	0	0			0	0	0	0	0		0	0	0	0	0	0	0		0	0	0		0	0			0	0	0		0	0	0	0	0	0
AMFR_2	ttttttttttttttttttcttttttcttttttttt	1	0	0	0	0	0		0	0	0	0	0	0	0			0	0	0	0	0		0	0	0	0	0	0	0		0	0	0		0	0			0	0	0		0	0	0	0	0	0
AMFR_2	ttttttttttttttttttttttttttccttttttt	1	0	0	0	0	0		0	0	0	0	0	0	0			0	0	0	0	0		0	0	0	0	0	0	0		0	0	0		0	0			0	0	0		0	0	0	0	0	0
AMFR_2	tttttcttttttttttttttttttttttttttttt	1	0	0	0	0	0		0	0	0	0	0	0	0			0	0	0	0	0		0	0	0	0	0	0	0		0	0	0		0	0			0	0	0		0	0	0	0	0	0
AMFR_2	tttttttttttttttttcttttttttttttttttc	1	0	0	0	0	0		0	0	0	0	0	0	0			0	0	0	0	0		0	0	0	0	0	0	0		0	0	0		0	0			0	0	0		0	0	0	0	0	0
AMFR_2	tttttttttttttttttttttttcttctttttttt	1	0	0	0	0	0		0	0	0	0	0.111111	0	0			0	0	0	0	0		0	0	0	0	0	0	0		0	0	0		0	0			0	0	0		0	0	0	0	0	0
AMFR_2	ttttttttctttttttttttttctttttttttttt	1	0	0	0	0	0		0	0	0	0	0.111111	0	0			0	0	0	0	0		0	0	0	0	0	0	0		0	0	0		0	0			0	0	0		0	0	0	0	0	0
AMFR_2	ttttttttttttttttttttctttttttctttttt	1	0	1	0	0	0		0	0	0	0	0	0	0			0	0	0	0	0		0	0	0	0	0	0	0		0	0	0		0	0			0	0	0		0	0	0	0	0	0
AMFR_2	tttttttttcctttttttttttttttttttttttt	1	0	0	0	0	0		0	0	0	0	0	0	0			0	0	0	0	0		0	0	0	0	0	0	0		0	0	0		0	0			0	0	0		0	0	0	0	0	0
AMFR_2	ttcttttcttttttttttttttttttttttttttt	1	0	0	0	0	0		0	0	0	0	0	0	0			0	0	0	0	0		0	0	0	0	0	0	0		0	0	0		0	0			0	0	0		0	0	0	0	0	0
AMFR_2	tttttttttctttttttttttcttttttttttttt	1	0	0	0	0	0		0	0	0	0	0	0	0			0	0	0	0	0		0	0	0	0	0	0	0		0	0	0		0	0			0	0	0		0	0	0	0	0	0
AMFR_2	tttttttttttttttttttttttcctttttttttt	1	0	0	0	0	0		0	0	0	0	0	0	0			0	0	0	0	0		0	0	0	0	0	0	0		0	0	0		0	0			0	0	0		0	0	0	0	0	0
AMFR_2	ttttttttcttttttttttttttcttttttttttt	1	0	0	0	0	0		0	0	0	0	0	0	0			0	0	0	0	0		0	0	0	0	0	0	0		0	0	0		0	0			0	0	0		0	0	0	0	0	0
AMFR_2	ttttttttttttttctttttttttttttttttctt	1	0	0	0	0	0		0	0	0	0	0	0	0			0	0	0	0	0		0	0	0	0	0	0	0		0	0	0		0	0			0	0	0		0	0	0	0	0	0
AMFR_2	ttttttttttttttttttttcttttcttttttttt	1	0	0	0	0	0		0	0	0	0	0	0	0			0	0	0	0	0		0	0	0	0	0	0	0		0	0	0		0	0			0	0	0		0	0	0	0	0	0
AMFR_2	tttttttttttttctttcttttttttttttttttt	1	0	0	0	0	0		0	0	0	0	0	0	0			0	0	0	0	0		0	0	0	0	0	0	0		0	0	0		0	0			0	0	0		0	0	0	0	0	0
AMFR_2	tttttttttttttttttttttttttcttttctttt	1	0	0	0	0	0		0	0	0	0	0	0	0			0	0	0	0	0		0	0	0	0	0	0	0		0	0	0		0	0			0	0	0		0	0	0	0	0	0
AMFR_3	tt	52970	0.898305	0.947368	0.830816	0.946768	0.899183	0.806452	0.838488	0.941558	0.889474	0.912162	0.842353	0.893424	0.927807	0.935323	0.814103	0.788793	0.882716	0.895973	0.835866	0.883146	0.906475	0.876984	0.885965	0.935065	0.915119	0.910448	0.880829	0.892982	0.785714	0.902235	0.904632	0.888502	0.9	0.896552	0.932584	0.94051	0.896266	0.915691	0.958763	0.933036	0.861111	0.887967	0.890173	0.938679	0.891304	0.837931	0.873754
AMFR_3	tc	4625	0.0779661	0.0350877	0.114804	0.0304183	0.0762943	0.172043	0.109966	0.038961	0.0473684	0.0810811	0.108235	0.0748299	0.0668449	0.0547264	0.134615	0.137931	0.0679012	0.0637584	0.106383	0.0741573	0.057554	0.0793651	0.0614035	0.04329	0.066313	0.0708955	0.0880829	0.0824561	0.142857	0.0810056	0.0708447	0.0766551	0.06	0.0689655	0.0486891	0.0368272	0.0539419	0.0632319	0.0257732	0.0446429	0.0902778	0.0829876	0.0924855	0.0471698	0.0745342	0.117241	0.0797342
AMFR_3	ct	1163	0.020339	0.0131579	0.0271903	0.0114068	0.013624	0	0.0378007	0.012987	0.0368421	0.00675676	0.0164706	0.0204082	0.00534759	0.00995025	0.0192308	0.0366379	0.0185185	0.0369128	0.0334347	0.0269663	0.0215827	0.0238095	0.0263158	0.021645	0.0132626	0.011194	0.0207254	0.0192982	0.0357143	0.0139665	0.0163488	0.0313589	0.035	0.0172414	0.00749064	0.00849858	0.0373444	0.0140515	0.0103093	0.0178571	0.0138889	0.0248963	0.0115607	0.0141509	0.0217391	0.0241379	0.0299003
AMFR_3	cc	687	0.00338983	0.00438596	0.0271903	0.0114068	0.0108992	0.0215054	0.0137457	0.00649351	0.0263158	0	0.0329412	0.0113379	0	0	0.0320513	0.0366379	0.0308642	0.0033557	0.0243161	0.0157303	0.0143885	0.0198413	0.0263158	0	0.00530504	0.00746269	0.0103627	0.00526316	0.0357143	0.0027933	0.00817439	0.00348432	0.005	0.0172414	0.011236	0.0141643	0.0124481	0.00702576	0.00515464	0.00446429	0.0347222	0.00414938	0.00578035	0	0.0124224	0.0206897	0.0166113
FBXW7_1	tttttttttttttttttttttt	1784	0.85	0.666667	1	0.888889	0.75	0.5	0.933333	0.8	0.7	0.818182	0.833333	0.875	0.866667	1	0.666667	0.846154	0.571429	0.8	0.666667	0.642857	0.8	0.714286	0.8	0.818182	0.8125	0.866667	0.666667	0.75	1	0.888889	0.909091	0.631579	1	0.75	0.764706	0.727273	0.666667	0.846154	0.923077	0.714286	1	0.846154	1	0.869565	1	0.705882	0.684211
FBXW7_1	tttttttctttttttttttttt	39	0	0	0	0	0	0	0	0	0	0	0	0	0.0666667	0	0	0	0	0	0	0	0	0	0	0	0	0	0.111111	0.0714286	0	0	0	0	0	0.125	0	0.0909091	0	0	0	0.142857	0	0	0	0	0	0	0.0526316
FBXW7_1	tctttttttttttttttttttt	37	0.05	0	0	0	0	0	0	0	0	0.0909091	0	0	0.0666667	0	0	0	0	0	0.0833333	0.142857	0	0	0	0.0909091	0	0	0.111111	0	0	0	0	0.0526316	0	0.125	0	0	0	0	0	0	0	0.0769231	0	0	0	0	0.157895
FBXW7_1	ttttttttttcttttttttttt	34	0	0	0	0	0	0	0	0	0	0	0	0.125	0	0	0.166667	0.0769231	0	0	0	0	0	0	0	0.0909091	0.0625	0	0	0.0714286	0	0	0	0	0	0	0.0588235	0	0	0	0.0769231	0	0	0	0	0	0	0	0.0526316
FBXW7_1	tttttttttttttttctttttt	27	0	0	0	0	0	0	0	0	0	0	0	0	0	0	0	0	0	0	0	0	0	0	0	0	0	0	0	0	0	0	0	0.210526	0	0	0.0588235	0	0	0	0	0	0	0	0	0.0434783	0	0	0
FBXW7_1	ttttcttttttttttttttttt	26	0	0	0	0	0.0833333	0	0	0	0	0	0	0	0	0	0	0	0	0	0	0.0714286	0	0	0	0	0	0	0	0.0357143	0	0	0	0	0	0	0	0	0	0	0	0	0	0	0	0.0434783	0	0	0
FBXW7_1	ttttttttttttttttcttttt	22	0.05	0	0	0	0	0	0	0	0	0	0	0	0	0	0	0	0.142857	0	0	0	0	0	0	0	0	0	0	0	0	0	0	0	0	0	0	0	0	0	0	0	0	0	0	0	0	0	0
FBXW7_1	ttcttttttttttttttttttt	22	0	0	0	0	0	0	0	0	0	0	0	0	0	0	0	0	0	0	0.0833333	0	0	0	0	0	0	0.133333	0	0	0	0	0	0	0	0	0	0.0909091	0	0	0	0	0	0	0	0	0	0.0588235	0.0526316
FBXW7_1	tttttttttttctttttttttt	19	0	0	0	0	0.166667	0	0	0	0	0	0	0	0	0	0	0	0	0	0	0	0	0.285714	0	0	0	0	0	0	0	0	0	0	0	0	0	0	0	0	0	0	0	0	0	0	0	0	0
FBXW7_1	tttttttttctttttttttttt	14	0	0.333333	0	0.111111	0	0	0	0	0.1	0	0	0	0	0	0	0	0	0	0	0	0	0	0	0	0	0	0	0	0	0	0	0	0	0	0	0	0	0	0	0	0	0	0	0	0	0	0
FBXW7_1	tttttttttttttttttctttt	14	0	0	0	0	0	0	0	0	0	0	0	0	0	0	0	0.0769231	0.142857	0	0	0	0	0	0	0	0	0	0	0	0	0	0	0	0	0	0.0588235	0	0	0	0	0	0	0	0	0.0434783	0	0	0
FBXW7_1	tttttttttttttctttttttt	14	0	0	0	0	0	0	0	0.2	0	0	0	0	0	0	0	0	0	0	0	0	0	0	0	0	0	0	0	0	0	0	0	0	0	0	0	0	0	0	0	0	0	0	0	0	0	0	0
FBXW7_1	tttttttttttttttttttttc	13	0	0	0	0	0	0	0	0	0	0	0	0	0	0	0	0	0	0	0	0	0	0	0	0	0	0	0	0.0357143	0	0	0	0.0526316	0	0	0.0588235	0	0	0	0	0	0	0	0	0	0	0	0
FBXW7_1	tttctttttttttttttttttt	13	0.05	0	0	0	0	0	0	0	0	0	0	0	0	0	0	0	0	0.2	0	0	0	0	0	0	0	0	0	0	0	0	0	0	0	0	0	0	0	0	0	0	0	0	0	0	0	0.0588235	0
FBXW7_1	ttttttttttttttttttcttt	13	0	0	0	0	0	0	0	0	0	0	0	0	0	0	0	0	0	0	0	0	0	0	0	0	0	0	0	0	0	0	0	0	0	0	0	0	0	0	0	0	0	0	0	0	0	0.0588235	0
FBXW7_1	ttttttttttttttcttttttt	13	0	0	0	0	0	0	0	0	0.1	0	0	0	0	0	0	0	0	0	0	0	0	0	0	0	0	0	0	0	0	0	0.0909091	0	0	0	0	0	0	0	0	0	0	0.0769231	0	0	0	0	0
FBXW7_1	tttttttttttttttttttctt	12	0	0	0	0	0	0	0	0	0	0	0.0833333	0	0	0	0	0	0	0	0	0	0	0	0	0	0	0	0	0	0	0	0	0	0	0	0	0	0	0	0	0	0	0	0	0	0	0.0588235	0
FBXW7_1	tttttctttttttttttttttt	12	0	0	0	0	0	0	0	0	0	0	0	0	0	0	0	0	0	0	0.0833333	0.0714286	0	0	0	0	0	0	0	0	0	0.0555556	0	0	0	0	0	0	0.333333	0	0	0	0	0	0	0	0	0	0
FBXW7_1	ttttttcttttttttttttttt	11	0	0	0	0	0	0	0	0	0	0	0	0	0	0	0	0	0	0	0.0833333	0	0	0	0	0	0.0625	0	0	0	0	0	0	0.0526316	0	0	0	0	0	0	0	0	0	0	0	0	0	0	0
FBXW7_1	ttttttttttttttttttttct	10	0	0	0	0	0	0	0	0	0	0	0	0	0	0	0	0	0	0	0	0	0	0	0	0	0	0	0	0.0357143	0	0	0	0	0	0	0	0	0	0	0	0	0	0	0	0	0	0	0
FBXW7_1	ttttttttcttttttttttttt	10	0	0	0	0	0	0.5	0	0	0	0	0	0	0	0	0	0	0.142857	0	0	0	0	0	0	0	0	0	0	0	0	0.0555556	0	0	0	0	0	0	0	0	0	0	0	0	0	0	0	0	0
FBXW7_1	ttttttttttttcttttttttt	9	0	0	0	0	0	0	0.0666667	0	0	0	0	0	0	0	0	0	0	0	0	0	0	0	0	0	0.0625	0	0	0	0	0	0	0	0	0	0	0.0909091	0	0	0	0	0	0	0	0	0	0	0
FBXW7_1	cttttttttttttttttttttt	7	0	0	0	0	0	0	0	0	0	0	0	0	0	0	0	0	0	0	0	0	0	0	0	0	0	0	0	0	0	0	0	0	0	0	0	0	0	0	0	0	0	0	0	0	0	0.0588235	0
FBXW7_1	tctttttctttttttttttttt	3	0	0	0	0	0	0	0	0	0	0	0	0	0	0	0	0	0	0	0	0	0	0	0	0	0	0	0	0	0	0	0	0	0	0	0	0	0	0	0	0	0	0	0	0	0	0	0
FBXW7_1	ttctttttttttttttcttttt	2	0	0	0	0	0	0	0	0	0	0	0	0	0	0	0	0	0	0	0	0	0	0	0	0	0	0	0	0	0	0	0	0	0	0	0	0	0	0.0769231	0	0	0	0	0	0	0	0	0
FBXW7_1	tttttttcttttttttttttct	2	0	0	0	0	0	0	0	0	0	0	0	0	0	0	0	0	0	0	0	0	0	0	0.2	0	0	0	0	0	0	0	0	0	0	0	0	0	0	0	0	0	0	0	0	0	0	0	0
FBXW7_1	ttttttttttctttcttttttt	1	0	0	0	0	0	0	0	0	0	0	0	0	0	0	0	0	0	0	0	0	0	0	0	0	0	0	0	0	0	0	0	0	0	0	0	0	0	0	0	0	0	0	0	0	0	0	0
FBXW7_1	ttttttttttttttctcttttt	1	0	0	0	0	0	0	0	0	0	0	0	0	0	0	0	0	0	0	0	0	0	0	0	0	0	0	0	0	0	0	0	0	0	0	0	0	0	0	0	0	0	0	0	0	0	0	0
FBXW7_1	tttttttcttttcttttttttt	1	0	0	0	0	0	0	0	0	0	0	0	0	0	0	0	0	0	0	0	0	0	0	0	0	0	0	0	0	0	0	0	0	0	0	0	0	0	0	0	0	0	0	0	0	0	0	0
FBXW7_1	ttcctttttttttttttttttt	1	0	0	0	0	0	0	0	0	0	0	0	0	0	0	0	0	0	0	0	0	0	0	0	0	0	0	0	0	0	0	0	0	0	0	0	0	0	0	0	0	0	0	0	0	0	0	0
FBXW7_1	ttctttttttttttttcttttc	1	0	0	0	0	0	0	0	0	0	0	0	0	0	0	0	0	0	0	0	0	0	0	0	0	0	0	0	0	0	0	0	0	0	0	0	0	0	0	0	0	0	0	0	0	0	0	0
FBXW7_1	tcttttttttttttttttttct	1	0	0	0	0	0	0	0	0	0	0	0.0833333	0	0	0	0	0	0	0	0	0	0	0	0	0	0	0	0	0	0	0	0	0	0	0	0	0	0	0	0	0	0	0	0	0	0	0	0
FBXW7_1	ttttttttttcttttctttttt	1	0	0	0	0	0	0	0	0	0	0	0	0	0	0	0	0	0	0	0	0	0	0	0	0	0	0	0	0	0	0	0	0	0	0	0	0	0	0	0	0	0	0	0	0	0	0	0
FBXW7_1	ctttcttttttttttttttttt	1	0	0	0	0	0	0	0	0	0	0	0	0	0	0	0	0	0	0	0	0	0	0	0	0	0	0	0	0	0	0	0	0	0	0	0	0	0	0	0	0	0	0	0	0	0	0	0
FBXW7_1	tttttttttctttttctttttt	1	0	0	0	0	0	0	0	0	0	0	0	0	0	0	0	0	0	0	0	0	0	0	0	0	0	0	0	0	0	0	0	0	0	0	0	0	0	0	0	0	0	0	0	0	0	0	0
FBXW7_1	tttctttttttttttctttttt	1	0	0	0	0	0	0	0	0	0	0	0	0	0	0	0	0	0	0	0	0	0	0	0	0	0	0	0	0	0	0	0	0	0	0	0	0	0	0.0769231	0	0	0	0	0	0	0	0	0
FBXW7_1	ttttttttctttcttttttttt	1	0	0	0	0	0	0	0	0	0	0	0	0	0	0	0	0	0	0	0	0	0	0	0	0	0	0	0	0	0	0	0	0	0	0	0	0	0	0	0	0	0	0	0	0	0	0	0
FBXW7_1	tttttttccccccccccctttt	1	0	0	0	0	0	0	0	0	0	0	0	0	0	0	0	0	0	0	0	0	0	0	0	0	0	0	0	0	0	0	0	0	0	0	0	0	0	0	0	0	0	0	0	0	0	0	0
FBXW7_1	tctttttttttctttttttttt	1	0	0	0	0	0	0	0	0	0	0	0	0	0	0	0	0	0	0	0	0	0	0	0	0	0	0	0	0	0	0	0	0	0	0	0	0	0	0	0	0	0	0	0	0	0	0	0
FBXW7_1	ttttcttttttctttttttttt	1	0	0	0	0	0	0	0	0	0	0	0	0	0	0	0.166667	0	0	0	0	0	0	0	0	0	0	0	0	0	0	0	0	0	0	0	0	0	0	0	0	0	0	0	0	0	0	0	0
FBXW7_1	ttttttttttcttttttttttc	1	0	0	0	0	0	0	0	0	0.1	0	0	0	0	0	0	0	0	0	0	0	0	0	0	0	0	0	0	0	0	0	0	0	0	0	0	0	0	0	0	0	0	0	0	0	0	0	0
FBXW7_1	tttttttcttttttttcttttt	1	0	0	0	0	0	0	0	0	0	0	0	0	0	0	0	0	0	0	0	0	0	0	0	0	0	0	0	0	0	0	0	0	0	0	0	0	0	0	0	0	0	0	0	0	0	0	0
FBXW7_1	tttttttctttttctttttttt	1	0	0	0	0	0	0	0	0	0	0	0	0	0	0	0	0	0	0	0	0	0	0	0	0	0	0	0	0	0	0	0	0	0	0	0	0	0	0	0	0.142857	0	0	0	0	0	0	0
FBXW7_1	ttttcctttttttttttttttt	1	0	0	0	0	0	0	0	0	0	0	0	0	0	0	0	0	0	0	0	0	0	0	0	0	0	0	0	0	0	0	0	0	0	0	0	0	0	0	0	0	0	0	0	0	0	0	0
FBXW7_1	ttcttttttttttctttttttt	1	0	0	0	0	0	0	0	0	0	0	0	0	0	0	0	0	0	0	0	0	0.2	0	0	0	0	0	0	0	0	0	0	0	0	0	0	0	0	0	0	0	0	0	0	0	0	0	0
FBXW7_1	tttttttttttttcttcttttt	1	0	0	0	0	0	0	0	0	0	0	0	0	0	0	0	0	0	0	0	0	0	0	0	0	0	0	0	0	0	0	0	0	0	0	0	0	0	0	0	0	0	0	0	0	0	0	0
FBXW7_1	tttttttttttttttttccttt	1	0	0	0	0	0	0	0	0	0	0.0909091	0	0	0	0	0	0	0	0	0	0	0	0	0	0	0	0	0	0	0	0	0	0	0	0	0	0	0	0	0	0	0	0	0	0	0	0	0
FBXW7_1	tttttttttcttttttttcttt	1	0	0	0	0	0	0	0	0	0	0	0	0	0	0	0	0	0	0	0	0	0	0	0	0	0	0	0.111111	0	0	0	0	0	0	0	0	0	0	0	0	0	0	0	0	0	0	0	0
FBXW7_1	tttctttctctttttttttttt	1	0	0	0	0	0	0	0	0	0	0	0	0	0	0	0	0	0	0	0	0	0	0	0	0	0	0	0	0	0	0	0	0	0	0	0	0	0	0	0	0	0	0	0	0	0	0	0
FBXW7_2	ttttttttttttttttttttttt	59549	0.813397	0.888889	0.865031	0.843972	0.835866	0.822222	0.836364	0.831325	0.883495	0.823741	0.828358	0.830986	0.769231	0.819277	0.811723	0.846386	0.836066	0.84375	0.85625	0.846361	0.789916	0.806034	0.826087	0.823529	0.819876	0.853583	0.868766	0.846479	0.808786	0.859272	0.850746	0.814815	0.855372	0.878187	0.832353	0.841424	0.796813	0.830153	0.824798	0.780576	0.848018	0.839228	0.831658	0.804422	0.838235	0.847122	0.808333
FBXW7_2	ttttttttttttttttttttctt	631	0.0215311	0.015873	0.0184049	0.00236407	0.00607903	0.0333333	0	0.0120482	0.00323625	0.00719424	0.00497512	0.00938967	0	0.0120482	0.0159858	0.0120482	0.00546448	0.00625	0.015625	0.00269542	0	0.00431034	0	0.00928793	0.00931677	0	0.00262467	0.0084507	0.00775194	0.00331126	0.0127932	0.00925926	0.0123967	0.00283286	0.0147059	0.0226537	0.0119522	0.0133588	0.00539084	0.00719424	0.00440529	0.0160772	0.0100503	0.0119048	0.00163399	0.00719424	0.0194444
FBXW7_2	tttttttttttcttttttttttt	582	0.0119617	0.010582	0.00613497	0.0118203	0.0121581	0	0.00363636	0.0120482	0.00323625	0.00719424	0.00995025	0.00469484	0.0615385	0.0240964	0.0124334	0.0105422	0.010929	0.00625	0.003125	0.0107817	0.00840336	0.00862069	0	0.00928793	0.015528	0.0155763	0.00262467	0.0056338	0.0129199	0.00165563	0.010661	0	0.0123967	0.00283286	0.00882353	0.0161812	0.0119522	0.00763359	0.0161725	0.0179856	0.00881057	0.00321543	0.00251256	0.0170068	0.00653595	0.0143885	0.00833333
FBXW7_2	ttttttttctttttttttttttt	578	0.00717703	0.021164	0.00306748	0.0118203	0.0121581	0.0222222	0.0145455	0.0060241	0.00970874	0.00359712	0.00746269	0.00469484	0	0.0120482	0.00888099	0.00451807	0.010929	0.00625	0	0.00539084	0.00840336	0.012931	0	0.00619195	0.00621118	0.00623053	0.00524934	0.00985915	0.0155039	0.00496689	0.00426439	0.00925926	0.00413223	0	0.0147059	0	0.0119522	0.00572519	0.00808625	0.0107914	0.0110132	0.0160772	0.0100503	0.0187075	0.00490196	0.00359712	0.0111111
FBXW7_2	tttttcttttttttttttttttt	572	0	0	0.0122699	0.0070922	0.00303951	0	0.00363636	0.0180723	0.00647249	0.0107914	0.00497512	0.0187793	0	0.0060241	0.0071048	0.00903614	0.00546448	0.00625	0.003125	0.0134771	0.0252101	0.00431034	0	0.0185759	0.00310559	0.00623053	0.00524934	0.00985915	0.00775194	0.00662252	0.00426439	0.00462963	0.00413223	0.00566572	0.00588235	0.00647249	0.0278884	0.0171756	0.00269542	0.028777	0.00881057	0.0128617	0.0150754	0.00510204	0.00816993	0.00539568	0.00555556
FBXW7_2	tttttttttttttttttcttttt	549	0	0	0.00613497	0.0141844	0.00911854	0	0	0.0060241	0	0.0179856	0.00497512	0	0	0.0240964	0.0053286	0.0060241	0.00273224	0.00625	0.00625	0.0134771	0	0.012931	0	0.00928793	0.0124224	0	0.00524934	0.00140845	0.0103359	0.00165563	0.010661	0.0138889	0	0.00566572	0.00588235	0.00647249	0	0.0019084	0.00539084	0.00359712	0.00220264	0	0.00753769	0.0119048	0.00490196	0.00359712	0.0111111
FBXW7_2	ttttttttttttttttttctttt	538	0.0167464	0.010582	0.0153374	0.00236407	0.0151976	0	0.0181818	0.0120482	0	0.00359712	0.00497512	0.0140845	0.0307692	0.0120482	0.0142096	0.00753012	0.00819672	0	0.00625	0.00539084	0	0.00862069	0	0.00619195	0.00310559	0.0124611	0.00787402	0.00985915	0.00775194	0.0165563	0.00852878	0	0.00826446	0.0141643	0.00588235	0.00323625	0.00398406	0.00954198	0.0107817	0.0215827	0.00440529	0.00643087	0.00753769	0.0119048	0.00653595	0.00179856	0.00277778
FBXW7_2	tttttttttttttcttttttttt	534	0.0119617	0.00529101	0.00306748	0.0070922	0.0212766	0.0111111	0.0181818	0.0060241	0.00323625	0.0107914	0.00248756	0.00938967	0.0153846	0.0120482	0.0017762	0.00903614	0.00273224	0.0125	0.015625	0	0.0168067	0	0	0.00309598	0.00931677	0.0155763	0.00262467	0.0084507	0	0.00662252	0.00426439	0.0231481	0	0.00849858	0.00882353	0.012945	0	0.00954198	0.00539084	0.00719424	0.00660793	0.00321543	0.0125628	0.00510204	0.00980392	0.00179856	0.0166667
FBXW7_2	ttttttttttctttttttttttt	525	0.0167464	0.00529101	0.00613497	0.0070922	0.00303951	0	0.00363636	0	0.00323625	0.0107914	0.00995025	0.00938967	0.0153846	0	0.0053286	0.00451807	0.0136612	0	0.009375	0.00539084	0.0168067	0.00431034	0	0.00928793	0.0186335	0.00311526	0.0104987	0.00704225	0.00775194	0.00662252	0.00852878	0.00925926	0	0.00566572	0.0117647	0.00970874	0	0.00954198	0.00808625	0.00719424	0.00440529	0.0096463	0.0125628	0.00680272	0.00163399	0.00359712	0.00277778
FBXW7_2	tttttttttcttttttttttttt	519	0.0215311	0.00529101	0.00306748	0.00945626	0.00303951	0.0222222	0.00363636	0	0.00647249	0.0143885	0.0124378	0.00938967	0	0	0.0053286	0.00903614	0.00273224	0	0.0125	0.00539084	0	0	0	0.00619195	0.00931677	0.00623053	0.0131234	0.0028169	0.0103359	0.00993377	0.00426439	0.00925926	0.0206612	0.00849858	0	0.00323625	0.00398406	0.00572519	0.00269542	0.00719424	0.00220264	0.0160772	0.00753769	0.0136054	0.0114379	0.00719424	0.00555556
FBXW7_2	tttttttttttttttcttttttt	487	0.00239234	0	0.0153374	0.0070922	0.0121581	0	0.0145455	0	0.00647249	0.0107914	0.00497512	0.00469484	0.0461538	0.0060241	0.0142096	0.0105422	0.00819672	0.00625	0.003125	0.00269542	0	0.00862069	0	0	0.00931677	0.00934579	0.00787402	0.00704225	0.00258398	0.00827815	0.0021322	0.00462963	0	0.00849858	0.00294118	0.00323625	0.0119522	0.00381679	0.00808625	0.00719424	0	0.00321543	0.0100503	0.00680272	0.0147059	0.00719424	0
FBXW7_2	tttttttttttttttttttcttt	472	0	0	0.00613497	0.0118203	0.00911854	0.0222222	0.00727273	0.0060241	0.00970874	0	0.00746269	0.00938967	0	0.0060241	0.0142096	0.00753012	0.00819672	0.0125	0	0.00269542	0	0	0.0434783	0	0.00621118	0	0.00524934	0.0056338	0.0129199	0.00827815	0	0	0.00826446	0.00283286	0.00882353	0.00970874	0.00796813	0.00763359	0.0134771	0.0107914	0.0154185	0.00643087	0.00251256	0.00340136	0.00816993	0.00179856	0.0138889
FBXW7_2	tttttttcttttttttttttttt	446	0.00956938	0	0.00306748	0.00472813	0.00911854	0	0.0109091	0.0060241	0	0.0107914	0.00746269	0.00469484	0	0	0.0106572	0.00301205	0	0.0125	0.021875	0.00269542	0	0.0215517	0.0434783	0.0247678	0.00310559	0.00311526	0.00787402	0.00422535	0.00258398	0.00993377	0.00639659	0.00462963	0.0165289	0.00566572	0.0117647	0	0.00796813	0	0.00808625	0.00359712	0.00881057	0.0096463	0.00753769	0.00510204	0.00653595	0.0125899	0
FBXW7_2	ttttttttttttttctttttttt	422	0.00478469	0.00529101	0	0.00472813	0	0	0	0.0120482	0	0.00359712	0.00746269	0.00469484	0	0	0.0106572	0.00451807	0.00273224	0.00625	0.009375	0	0.0252101	0.00862069	0	0	0.00931677	0.00934579	0.0131234	0.0056338	0.00258398	0.00496689	0.00426439	0.0138889	0.00413223	0.00566572	0.00588235	0.00323625	0.0119522	0.00572519	0.0161725	0.00359712	0.00440529	0.0096463	0	0.00680272	0.00816993	0.00359712	0.00833333
FBXW7_2	tttcttttttttttttttttttt	405	0.00239234	0	0.00306748	0.00236407	0.00303951	0.0111111	0.00363636	0	0.00323625	0.00359712	0.00746269	0.0140845	0	0	0.0017762	0.00301205	0.00819672	0.0125	0	0.00808625	0	0.012931	0	0.00619195	0.00621118	0.00311526	0.00262467	0.015493	0.0103359	0.00165563	0.00426439	0.0138889	0	0.00283286	0	0.00323625	0.00796813	0.00572519	0.00808625	0.00359712	0.0132159	0.00321543	0.00502513	0.00340136	0.00326797	0.00179856	0
FBXW7_2	ctttttttttttttttttttttt	396	0.00239234	0	0.00306748	0.0070922	0.00607903	0	0.0109091	0	0.00647249	0.00719424	0.00746269	0.00938967	0	0.0060241	0.0017762	0.00753012	0.00273224	0.0125	0	0.0134771	0.00840336	0	0.0434783	0.0123839	0	0.00623053	0.00262467	0.0028169	0.00258398	0.00165563	0.00639659	0.00462963	0	0.00283286	0.00882353	0.00323625	0.0159363	0.00572519	0.00808625	0.00719424	0.00660793	0.00321543	0.00753769	0.00170068	0.00326797	0.00719424	0.00833333
FBXW7_2	ttttttttttttttttctttttt	382	0.00956938	0	0.00613497	0.00236407	0.00303951	0	0.00363636	0	0.012945	0	0.00995025	0	0	0.0120482	0.0071048	0.0060241	0.0136612	0.00625	0.003125	0.00808625	0	0.00431034	0	0	0.00310559	0.00623053	0.00524934	0.0056338	0.0180879	0.00496689	0	0.00462963	0.0123967	0	0	0.00647249	0.00398406	0.00381679	0.00269542	0.00719424	0.00440529	0.00321543	0	0.00680272	0.00490196	0.0125899	0.00833333
FBXW7_2	ttttctttttttttttttttttt	359	0.00239234	0	0.00920245	0	0.00911854	0.0111111	0	0.0060241	0.00647249	0.00359712	0.00497512	0.00469484	0	0.0120482	0.0071048	0.0060241	0.00819672	0.00625	0	0.00269542	0.00840336	0.012931	0	0.00619195	0.00310559	0.00934579	0.00524934	0	0.00516796	0.00496689	0.0127932	0.00462963	0.00826446	0	0.00588235	0.00647249	0	0.00763359	0	0.0143885	0.0154185	0.0096463	0.00753769	0.00170068	0.00490196	0.00719424	0.00277778
FBXW7_2	ttttttctttttttttttttttt	358	0.00956938	0.00529101	0	0	0.00303951	0	0.00363636	0.0120482	0.00323625	0.0107914	0	0.00938967	0	0.0180723	0.0124334	0.00301205	0.0163934	0.00625	0.00625	0.00269542	0.0168067	0.012931	0	0.00619195	0.00931677	0	0.00524934	0.00422535	0.00775194	0.00331126	0.00426439	0.0231481	0	0.00566572	0.0117647	0.00323625	0.00796813	0.00763359	0.00269542	0	0.00660793	0.00321543	0.00251256	0.00510204	0.00816993	0.00899281	0.00555556
FBXW7_2	ttttttttttttttttttttttc	350	0.00478469	0.010582	0	0.00236407	0.00607903	0	0.00363636	0.0060241	0.00647249	0.00359712	0	0	0	0	0.0035524	0.00451807	0.00273224	0.00625	0	0.00269542	0.00840336	0.00862069	0	0.00309598	0	0.00934579	0.00524934	0.00422535	0	0.00662252	0.00852878	0.00462963	0.00413223	0.00283286	0.00882353	0	0.00796813	0.00572519	0.00539084	0	0.00440529	0	0.00251256	0.0102041	0.00326797	0.00539568	0.00555556
FBXW7_2	tttttttttttttttttttttct	349	0.00478469	0	0	0.0070922	0.00303951	0	0.0109091	0	0.00323625	0.00359712	0.00248756	0	0	0.0060241	0.0035524	0.00903614	0.00273224	0	0	0.00269542	0	0.00431034	0.0434783	0.00309598	0.00621118	0.00311526	0.00524934	0.00422535	0	0	0.0021322	0.00462963	0.00826446	0.00566572	0	0.00970874	0.00398406	0.00954198	0	0.00719424	0.00220264	0.00321543	0.00502513	0.00340136	0.00653595	0.00539568	0.0111111
FBXW7_2	tcttttttttttttttttttttt	316	0.00239234	0	0.00306748	0.0070922	0.00303951	0	0.00363636	0.0060241	0	0.00719424	0.00746269	0.00469484	0.0153846	0	0.0035524	0	0.00273224	0.00625	0	0.00808625	0.0168067	0.00862069	0	0.00619195	0.00931677	0	0.00524934	0.0056338	0.0129199	0.00331126	0	0.00925926	0	0.00566572	0.00294118	0.00970874	0.0119522	0.0019084	0.00539084	0.0179856	0	0	0.0100503	0.0085034	0.00326797	0	0.0138889
FBXW7_2	ttctttttttttttttttttttt	312	0.00956938	0	0.00920245	0	0.00303951	0	0.00727273	0.0060241	0.00970874	0.00719424	0.00995025	0.00938967	0.0153846	0	0.00888099	0.00451807	0.00819672	0.0125	0.009375	0.00539084	0	0.012931	0	0.00309598	0.00310559	0.00623053	0	0.00422535	0.00516796	0.00496689	0.00639659	0.00462963	0	0	0.00882353	0	0.0119522	0.0019084	0.00808625	0.00719424	0.00440529	0.00321543	0.00251256	0.0085034	0.0114379	0.00179856	0.00555556
FBXW7_2	ttttttttttttctttttttttt	268	0.00239234	0.00529101	0.00306748	0.00945626	0	0.0111111	0.00727273	0.0120482	0	0	0.00995025	0	0	0	0.0017762	0.00150602	0	0.00625	0.0125	0.00539084	0.00840336	0	0	0	0.00621118	0.00311526	0	0.00422535	0.00516796	0.00662252	0.0021322	0	0.00826446	0.00566572	0.00294118	0.00647249	0.0119522	0.00763359	0.00269542	0.00719424	0.00220264	0	0.00502513	0.0102041	0.00490196	0.00359712	0.00833333
FBXW7_2	tttttttttcctttttttttttt	14	0	0	0	0	0	0	0	0	0	0	0	0	0	0	0	0	0	0	0	0	0	0	0	0	0	0	0	0	0	0	0	0	0	0	0	0	0	0	0.00269542	0	0	0	0	0	0	0	0
FBXW7_2	tttttcttttttttttttctttt	11	0	0	0	0	0	0	0	0	0	0	0	0	0	0	0	0	0	0	0	0	0	0	0	0	0	0	0	0	0	0	0	0	0	0	0	0	0	0	0	0	0	0	0	0	0	0	0
FBXW7_2	ttttttttctctttttttttttt	4	0	0	0	0.00236407	0	0	0	0	0	0	0	0	0	0	0	0	0	0	0	0	0	0	0	0	0	0	0	0	0	0	0	0	0	0	0	0	0	0	0	0	0	0	0	0	0	0	0
FBXW7_2	tttttctttcttttttctttttt	4	0	0	0	0	0	0	0	0	0	0	0	0	0	0	0	0	0	0	0	0	0	0	0	0	0	0	0	0	0	0	0	0	0	0	0	0	0	0	0	0	0	0	0	0	0	0	0
FBXW7_2	tctttttttttttttcttttttt	3	0	0	0	0	0	0.0222222	0	0	0	0	0	0	0	0	0	0	0	0	0	0	0	0	0	0	0	0	0	0	0	0	0	0	0	0	0	0	0	0	0	0	0	0	0	0	0	0	0
FBXW7_2	tttttttttttttttcttttttc	1	0	0	0	0	0	0	0	0	0	0	0	0	0	0	0	0	0	0	0	0	0	0	0	0	0	0	0	0	0	0	0	0	0	0	0	0	0	0	0	0	0	0	0	0	0	0	0
FBXW7_3	tttttt	98588	0.957356	0.929114	0.936842	0.935185	0.945338	0.941441	0.953883	0.944615	0.958763	0.959432	0.944348	0.926829	0.964346	0.933977	0.942353	1	0.948315	0.932084	0.939394	0.954644	0.968037	0.913201	0.929114	0.953074	0.95203	0.940574	0.940299	0.946136	0.94484	0.922601	0.936789	0.947658	0.951542	0.935636	0.944245	0.957921	0.961631	0.944979	0.95935	0.956175	0.971681	0.957295	0.961661	0.944776	0.960165	0.931559	0.946918
FBXW7_3	ttttct	1050	0.00639659	0.0101266	0.00526316	0.00617284	0.00643087	0.0135135	0.00728155	0.0215385	0.0123711	0.0020284	0.00695652	0.00762195	0.00848896	0.0225443	0.0129412	0	0.011236	0.0117096	0.0113636	0.00647948	0.00456621	0.0108499	0.00506329	0.00161812	0.00738007	0.00819672	0.0199005	0.00702576	0.0160142	0.0170279	0.0126422	0.00826446	0.00881057	0.00313972	0.00179856	0.00990099	0.00479616	0.00962861	0.00650407	0.00398406	0.00884956	0.00177936	0.00958466	0.00447761	0.00824176	0.0139417	0.0205479
FBXW7_3	ttcttt	958	0.00426439	0.0151899	0.0105263	0.0154321	0.00803859	0.0045045	0.00728155	0.00923077	0.00412371	0.0020284	0.00173913	0.0213415	0.00339559	0.00161031	0.0129412	0	0.00674157	0.0163934	0.00757576	0.0107991	0.00913242	0.0216998	0.0101266	0.0177994	0.00922509	0.00204918	0.0066335	0.00936768	0.00533808	0.00464396	0.00758534	0	0.00881057	0.0156986	0.0125899	0.0148515	0.00959233	0.0206327	0.0113821	0.00199203	0.00530973	0.0088968	0.00958466	0.00597015	0.00549451	0.00760456	0.0119863
FBXW7_3	cttttt	893	0.00426439	0.00506329	0.00526316	0.00925926	0.00803859	0.0135135	0.0121359	0.00615385	0.00412371	0.00811359	0.0243478	0.0167683	0.00509338	0.00644122	0.00705882	0	0.011236	0.0210773	0.00757576	0.00215983	0	0.00904159	0.00759494	0.00970874	0.00738007	0.0204918	0.00497512	0.0163934	0.0160142	0.0123839	0.00632111	0.0110193	0.00220264	0.0141287	0.0143885	0.0049505	0.00479616	0.00687758	0.00487805	0.0059761	0.00530973	0.00355872	0.00159744	0.0134328	0.00686813	0.00760456	0.00171233
FBXW7_3	tttttc	830	0.0127932	0.0202532	0.0105263	0.00925926	0.0128617	0.0135135	0.00970874	0.00615385	0	0.0040568	0.00869565	0.00762195	0.00509338	0.00805153	0.0105882	0	0.00449438	0.00702576	0.0094697	0.00863931	0.00456621	0.0271248	0.00759494	0.00485437	0.00369004	0.0102459	0.013267	0.00468384	0.0106762	0.0123839	0.011378	0.0165289	0.00660793	0.00784929	0.00539568	0	0.00719424	0.00825309	0.00487805	0.00996016	0.00176991	0.0106762	0.00638978	0.0119403	0.00549451	0.0152091	0.00856164
FBXW7_3	tctttt	787	0.00426439	0.0151899	0.0210526	0.00925926	0.011254	0.0045045	0.00242718	0.00307692	0.0123711	0.00608519	0.0104348	0.0137195	0.0118846	0.0193237	0.00235294	0	0.00898876	0.00936768	0.0113636	0.0107991	0	0.00723327	0.0202532	0.00809061	0.00738007	0.00614754	0.00829187	0.00702576	0	0.00928793	0.0151707	0.00550964	0.0110132	0.0156986	0.00719424	0.0049505	0.00959233	0.00412655	0.00325203	0.00796813	0.00353982	0.0088968	0.00638978	0.00447761	0.00824176	0.0139417	0.00513699
FBXW7_3	tttctt	701	0.00852878	0.00506329	0.0105263	0.0154321	0.00803859	0.0045045	0.00728155	0.00923077	0.00824742	0.0141988	0.00173913	0.00609756	0	0.00483092	0.0117647	0	0.00898876	0.00234192	0.0132576	0.00431965	0.0136986	0.0108499	0.0177215	0.00323625	0.00553506	0.00819672	0.0066335	0.0058548	0.00533808	0.0154799	0.0101138	0.0110193	0.00881057	0.00784929	0.0125899	0.00247525	0.00239808	0.00550206	0.00650407	0.0119522	0.00176991	0.0088968	0.00479233	0.0119403	0.00274725	0.00760456	0.00342466
FBXW7_3	ctttct	12	0	0	0	0	0	0	0	0	0	0	0	0	0	0	0	0	0	0	0	0	0	0	0	0	0	0	0	0	0.00177936	0	0	0	0	0	0	0	0	0	0	0.00199203	0	0	0	0	0	0	0
GRINA_1	tttttttttttttttttttttttt	27061	0.758621	0.864198	0.745902	0.769231	0.821429	0.755556	0.775	0.72807	0.816092	0.761905	0.748899	0.795181	0.711111	0.857143	0.631902	0.73743	0.757225	0.727273	0.746269	0.752336	0.738095	0.888889	0.831579	0.761194	0.81592	0.746269	0.772277	0.787172	0.770588	0.729614	0.751445	0.819355	0.773333	0.835165	0.815789	0.796407	0.779817	0.676923	0.764368	0.868263	0.83908	0.737255	0.799127	0.753846	0.727273	0.747475	0.699454
GRINA_1	ttttttttttttttttttttcttt	680	0.00492611	0	0.0163934	0.0180995	0.00892857	0.0333333	0.00625	0.0263158	0.0287356	0.0238095	0.0176211	0.0060241	0.0333333	0.0150376	0.122699	0.0111732	0.0346821	0.027972	0.0348259	0.0186916	0.0119048	0.00925926	0.0210526	0.00746269	0.00497512	0.00746269	0.0247525	0.0174927	0.0411765	0.0343348	0.00578035	0.00645161	0	0.010989	0.0131579	0.0598802	0	0.0410256	0.0229885	0.00598802	0.00574713	0.00784314	0.0524017	0.0153846	0.0334928	0.030303	0.010929
GRINA_1	ttttttttttttttttttttttct	501	0.0246305	0	0.0163934	0.0271493	0.0178571	0.0111111	0.0125	0.0175439	0	0.0119048	0.00881057	0	0.0388889	0	0.0122699	0.0223464	0.00578035	0.00699301	0.0248756	0.0140187	0	0.00925926	0.0105263	0.00746269	0.00497512	0.0149254	0.0049505	0.0116618	0.0588235	0.0171674	0.0520231	0.0193548	0.0133333	0	0	0.00598802	0.00917431	0.0512821	0.00574713	0.011976	0.0114943	0.0431373	0.0131004	0.0115385	0.00956938	0.00505051	0.0327869
GRINA_1	tttttttttttttttttttttttc	501	0.0246305	0.00617284	0	0.00904977	0	0	0.00625	0.0438596	0.0172414	0.0238095	0.00881057	0.0060241	0	0	0.0184049	0.0167598	0	0.013986	0.0149254	0.0233645	0.0119048	0.00925926	0	0.0223881	0.0199005	0.0149254	0	0.0116618	0.00588235	0.0128755	0.017341	0.0193548	0.0266667	0	0.00657895	0.011976	0	0.0102564	0.00574713	0	0.00574713	0.0156863	0.0262009	0.0230769	0.0430622	0.020202	0
GRINA_1	ttttttttttttttttttcttttt	436	0	0.0185185	0.0327869	0.00904977	0.00446429	0.0111111	0.01875	0.0175439	0.0114943	0.0178571	0.0132159	0.0060241	0.0111111	0.0150376	0.0245399	0	0.0115607	0.020979	0.0199005	0.0140187	0.0357143	0.00925926	0	0.0149254	0.0149254	0.0149254	0.00990099	0.00291545	0.0176471	0.00858369	0.00578035	0	0.0133333	0.010989	0	0	0.00917431	0.0153846	0.00574713	0	0.00574713	0.00392157	0	0.0115385	0.00478469	0.020202	0.010929
GRINA_1	ttttcttttttttttttttttttt	326	0.00985222	0.00617284	0.0245902	0.00904977	0.00892857	0.0222222	0.00625	0	0.0172414	0.00595238	0	0	0.0166667	0.0150376	0.00613497	0.00558659	0.017341	0.041958	0.0248756	0.0046729	0.0119048	0.0185185	0.0105263	0.0223881	0.0199005	0.0223881	0.039604	0.00874636	0.00588235	0.00858369	0	0.0129032	0	0	0.0526316	0.011976	0	0.025641	0	0.00598802	0.00574713	0.0117647	0.00873362	0.00769231	0	0.010101	0.010929
GRINA_1	tttttttctttttttttttttttt	311	0.00492611	0.00617284	0.00819672	0.0135747	0	0.0111111	0.01875	0.0175439	0.00574713	0.00595238	0.0220264	0.0180723	0.0333333	0	0.00613497	0.00558659	0.0115607	0.00699301	0.00497512	0.0140187	0.0119048	0	0	0.00746269	0	0	0.0049505	0.0058309	0	0.00858369	0.00578035	0	0	0	0	0	0.0366972	0.025641	0	0.011976	0	0.00784314	0.00436681	0.00769231	0.0239234	0.0252525	0.0327869
GRINA_1	ttttttttttttttttcttttttt	303	0.0197044	0	0.00819672	0	0.00892857	0.0111111	0	0	0.00574713	0.0119048	0.00440529	0.0060241	0.0277778	0	0.00613497	0.00558659	0.017341	0.00699301	0.0149254	0	0.0357143	0	0.0105263	0.0149254	0.00995025	0.0149254	0.0049505	0.0145773	0	0.00858369	0.00578035	0	0.04	0	0.00657895	0	0	0.0307692	0.00574713	0	0.0114943	0.00784314	0	0	0.00478469	0.010101	0
GRINA_1	tttttttttttttttttctttttt	293	0.0344828	0.0123457	0	0.00904977	0.0133929	0.0666667	0.01875	0.0263158	0.0114943	0.00595238	0.00881057	0.0120482	0.00555556	0	0.0245399	0.0111732	0.0115607	0.00699301	0.00497512	0.0046729	0	0	0	0.0298507	0.00497512	0.0149254	0.0049505	0.0058309	0.00588235	0.0343348	0.00578035	0.00645161	0.0666667	0	0.00657895	0.00598802	0	0	0	0	0.00574713	0.00392157	0.00873362	0.00384615	0.00478469	0.0151515	0.00546448
GRINA_1	tttttttttttttttttttctttt	289	0.0147783	0.00617284	0.00819672	0.00904977	0.0133929	0.0222222	0.00625	0.0175439	0.00574713	0.00595238	0.00440529	0	0.00555556	0.0150376	0	0.0167598	0	0	0.00995025	0.0140187	0	0	0.0105263	0	0	0.0149254	0.00990099	0.00874636	0	0.00429185	0.00578035	0.0129032	0	0.010989	0	0	0.00917431	0.0153846	0.0114943	0.0239521	0	0.0117647	0.00873362	0.0192308	0.00478469	0	0.0218579
GRINA_1	tttttttttttttttttttttctt	282	0.00492611	0.00617284	0.00819672	0.00452489	0.0178571	0	0	0.00877193	0	0	0.00440529	0	0.00555556	0	0.00613497	0	0.0115607	0.013986	0	0.0140187	0	0	0.0105263	0	0.00497512	0.00746269	0.0148515	0.0233236	0	0.00858369	0.0346821	0.00645161	0.0133333	0	0.00657895	0.0179641	0	0	0	0	0.0114943	0.0235294	0.00436681	0.00769231	0.00956938	0.00505051	0
GRINA_1	ttttttttttttcttttttttttt	274	0.00985222	0.00617284	0	0.0180995	0	0.0111111	0.0125	0	0	0	0.0176211	0.0060241	0.00555556	0	0	0.0111732	0.00578035	0.013986	0.00497512	0	0	0	0	0	0	0.00746269	0.0049505	0.00874636	0	0.00429185	0	0.00645161	0.0133333	0.021978	0.00657895	0.00598802	0.0275229	0	0	0.0179641	0.0172414	0.00784314	0	0.0115385	0	0.00505051	0.0218579
GRINA_1	ttcttttttttttttttttttttt	258	0.0147783	0.00617284	0	0	0.00446429	0	0.01875	0	0	0.0119048	0.00881057	0.0060241	0.0111111	0.0075188	0	0.00558659	0	0	0	0.00934579	0	0	0.0105263	0.0223881	0	0.00746269	0	0.0058309	0	0.00858369	0.00578035	0.0258065	0	0	0.00657895	0.011976	0.0183486	0.025641	0.0172414	0	0	0.00784314	0	0.0115385	0.00956938	0.00505051	0.010929
GRINA_1	tttttttttttctttttttttttt	247	0.00492611	0	0	0.00904977	0	0	0.00625	0	0	0	0.0132159	0.0060241	0.00555556	0	0.0245399	0.00558659	0	0.00699301	0.0149254	0.00934579	0	0	0	0.00746269	0.0248756	0.00746269	0.0148515	0.00874636	0	0.00858369	0.0231214	0	0.0133333	0.021978	0.00657895	0.00598802	0	0	0.0172414	0	0.0114943	0.00392157	0	0.0153846	0.00478469	0.00505051	0.0163934
GRINA_1	ttttttttttttttcttttttttt	222	0	0.0185185	0.00819672	0	0.00446429	0.0222222	0.0125	0.00877193	0.00574713	0	0.00881057	0.0180723	0.00555556	0.0075188	0	0.0391061	0.00578035	0.013986	0.00995025	0.0280374	0.0119048	0.00925926	0	0.00746269	0	0.0149254	0.0049505	0.0116618	0.00588235	0.00858369	0	0	0	0.010989	0.00657895	0.00598802	0.00917431	0.0102564	0.0344828	0	0.0172414	0.0117647	0.00436681	0	0.0143541	0	0.0327869
GRINA_1	tttttttttctttttttttttttt	217	0.00985222	0	0	0.0135747	0.00446429	0	0.00625	0.00877193	0.00574713	0	0.00881057	0.0060241	0.0111111	0.0075188	0	0.00558659	0	0.020979	0	0	0.0238095	0	0.0105263	0.0149254	0	0	0.0148515	0.00291545	0.00588235	0	0	0.00645161	0	0.032967	0.0131579	0.00598802	0.00917431	0	0.0172414	0.00598802	0.0172414	0.00392157	0	0.00769231	0	0.0252525	0.0218579
GRINA_1	ttttttttcttttttttttttttt	216	0	0	0.00819672	0.00904977	0.00892857	0	0	0.0175439	0	0.00595238	0	0.0060241	0.00555556	0.0075188	0.0122699	0	0.017341	0	0	0.0046729	0	0	0	0.00746269	0.00497512	0	0.00990099	0.00291545	0.0117647	0	0.0115607	0	0	0.010989	0	0.011976	0	0.0102564	0.0172414	0	0.00574713	0.0235294	0	0.0192308	0.00478469	0.010101	0.0163934
GRINA_1	tttttctttttttttttttttttt	197	0	0.0185185	0.00819672	0.00452489	0.0133929	0	0.00625	0.00877193	0.00574713	0	0.00881057	0.0120482	0	0.0075188	0.0122699	0.00558659	0	0.00699301	0.00995025	0.00934579	0.0119048	0	0.0105263	0.0149254	0	0.0223881	0.029703	0	0.00588235	0.00429185	0.0115607	0.00645161	0	0	0.00657895	0.00598802	0	0	0.00574713	0.00598802	0	0.0117647	0	0.0115385	0.0143541	0	0.00546448
GRINA_1	tctttttttttttttttttttttt	186	0	0	0	0.0135747	0.00446429	0	0.01875	0.00877193	0.0114943	0	0.00440529	0	0	0	0.00613497	0.0111732	0	0	0	0.0046729	0.0238095	0.037037	0	0.00746269	0.00995025	0.0149254	0	0.0116618	0	0.0128755	0	0.00645161	0	0	0	0	0.0366972	0.00512821	0.00574713	0	0.00574713	0.00784314	0.00873362	0	0	0.010101	0
GRINA_1	tttctttttttttttttttttttt	182	0	0	0	0.00904977	0.00892857	0	0.00625	0.00877193	0.0172414	0.00595238	0.00440529	0.0060241	0.0222222	0	0.0245399	0.0111732	0.0115607	0.00699301	0.00995025	0.00934579	0	0	0.0210526	0	0	0.00746269	0.0049505	0.0058309	0.00588235	0.00429185	0	0	0	0	0.00657895	0	0	0.00512821	0.0172414	0	0	0.00392157	0.00873362	0.00769231	0.0191388	0.010101	0
GRINA_1	cttttttttttttttttttttttt	180	0	0	0.0327869	0.00452489	0.00446429	0.0111111	0.00625	0	0	0	0.00440529	0.0060241	0.00555556	0.0150376	0	0.0111732	0.00578035	0.00699301	0	0	0.0119048	0	0	0.00746269	0.00497512	0	0.0049505	0	0	0.00429185	0.017341	0.0129032	0	0	0	0	0	0.00512821	0	0.0179641	0.0114943	0.00392157	0.00436681	0.0115385	0.00478469	0	0
GRINA_1	tttttttttttttctttttttttt	179	0.00492611	0.00617284	0.00819672	0.00904977	0.00892857	0	0	0.00877193	0.00574713	0.00595238	0.00440529	0.0240964	0	0.0075188	0	0	0.00578035	0.00699301	0	0	0.0119048	0	0.0105263	0.00746269	0.0149254	0.00746269	0	0.00291545	0	0.00429185	0	0	0	0	0	0.011976	0	0.0153846	0	0	0	0.00392157	0.00873362	0.00384615	0.0143541	0.00505051	0
GRINA_1	ttttttttttcttttttttttttt	167	0.00985222	0.00617284	0	0.00904977	0	0	0	0.0175439	0.00574713	0	0.00440529	0.0180723	0	0	0.00613497	0	0.00578035	0	0.00995025	0	0	0	0	0.00746269	0.00995025	0.00746269	0	0.00291545	0	0.00429185	0	0.0129032	0	0.010989	0.00657895	0	0.00917431	0	0	0	0	0	0	0.0115385	0.00478469	0	0.0163934
GRINA_1	tttttttttttttttctttttttt	155	0.0197044	0	0.00819672	0	0.00446429	0	0.0125	0	0.0114943	0.00595238	0	0.0060241	0.00555556	0.0075188	0	0	0.0231214	0.00699301	0.00497512	0.0140187	0	0	0	0	0.00497512	0	0	0	0.0117647	0.00429185	0	0.0129032	0	0	0	0	0	0	0.0172414	0	0	0.00784314	0	0	0.00956938	0.0151515	0.010929
GRINA_1	ttttttcttttttttttttttttt	148	0	0	0.0163934	0.00452489	0	0	0.00625	0	0	0	0.00881057	0.0180723	0.0111111	0	0.0184049	0.00558659	0	0.00699301	0	0	0.0119048	0	0.0105263	0	0	0	0	0	0	0.0257511	0	0.00645161	0	0.010989	0	0	0.0275229	0	0	0	0	0	0	0	0.00956938	0	0
GRINA_1	ttttttttttttttttttttcctt	15	0	0	0	0	0	0	0	0	0	0	0	0	0	0	0	0	0	0	0	0	0	0	0	0	0	0	0	0	0	0	0	0	0	0	0	0	0	0	0	0	0	0	0	0	0.00956938	0	0
GRINA_1	tttttttttttttttttccttttt	14	0	0	0	0	0	0	0	0	0	0	0	0	0	0	0	0	0	0	0	0.00934579	0	0	0	0	0	0	0	0	0	0	0	0	0	0	0	0	0	0	0	0	0	0	0	0	0	0	0
GRINA_1	tttttttctttttttttttttttc	9	0	0	0	0	0	0	0	0	0	0	0	0	0	0	0	0	0	0	0	0	0	0	0	0	0	0	0	0.0058309	0	0	0	0	0	0	0	0	0	0	0	0	0	0	0	0	0	0	0
GRINA_1	tttcttttttttttttttttttct	6	0	0	0	0	0	0	0	0	0	0	0	0	0	0	0	0	0	0	0	0	0	0	0	0	0	0	0	0	0	0	0	0	0	0	0	0	0	0	0	0	0	0	0	0	0	0	0
GRINA_2	tttttttttttttttttt	1											1
INSIG1_1	ttttttttttttttttt	99546	0.837054	0.863924	0.864672	0.860123	0.880682	0.86802	0.862745	0.88417	0.860262	0.897574	0.835793	0.852792	0.885246	0.855769	0.857904	0.881188	0.869458	0.835227	0.852482	0.848062	0.914956	0.845455	0.899457	0.871767	0.854325	0.888889	0.877333	0.849706	0.845614	0.884427	0.858794	0.822323	0.866071	0.841972	0.871969	0.863297	0.864583	0.877986	0.87	0.866211	0.875315	0.860465	0.858108	0.874591	0.866538	0.861823	0.885714
INSIG1_1	tttttttttcttttttt	1612	0.0290179	0.0126582	0.0156695	0.00981595	0.00994318	0.0203046	0.0231729	0.00772201	0.010917	0.00539084	0.0184502	0.0219966	0.010929	0.0192308	0.0142096	0.0148515	0.0197044	0.0255682	0.00992908	0.0248062	0.00879765	0.0181818	0.0163043	0.0172414	0.0197269	0.0127505	0.0186667	0.015953	0.00701754	0.00783546	0.0165153	0.0273349	0.0193452	0.0214918	0.0252182	0.0157415	0.0223214	0.0116204	0.013	0.00878906	0.0151134	0.0101744	0.0101351	0.00981461	0.0116054	0.014245	0.0164835
INSIG1_1	ttttttttttttttttc	1100	0.015625	0.0221519	0.0042735	0.00736196	0.00994318	0.00507614	0.0106952	0	0.00655022	0.00539084	0.00922509	0.00846024	0.0150273	0.00320513	0.017762	0.00247525	0.0147783	0.0142045	0.0212766	0.0108527	0	0.0145455	0.0163043	0.00431034	0.0091047	0.00910747	0.00266667	0.00419815	0.0122807	0.00881489	0.00660611	0.0136674	0.00892857	0.0101138	0.00775946	0.0107705	0.0104167	0.0142027	0.015	0.0126953	0.00755668	0.00436047	0.00844595	0.00981461	0.000967118	0.0042735	0.0043956
INSIG1_1	ttctttttttttttttt	978	0.0178571	0.00316456	0.00712251	0.00613497	0.00426136	0.00507614	0.00534759	0	0.00873362	0.00539084	0.00553506	0.00846024	0.00409836	0.00961538	0.00888099	0.00990099	0.00246305	0.0170455	0.00567376	0.00775194	0.0058651	0.00545455	0	0.0118534	0.00758725	0.00364299	0.0106667	0.00503778	0.0140351	0.00391773	0.00825764	0.0159453	0.0119048	0.00379267	0.00581959	0.0024855	0.00446429	0.0142027	0.009	0.0126953	0.00629723	0.00290698	0.0135135	0.00763359	0.00773694	0.017094	0.00769231
INSIG1_1	ttttttttctttttttt	957	0.00446429	0.00632911	0.0128205	0.0110429	0.00284091	0.00507614	0.00178253	0.00772201	0.010917	0.0161725	0.0110701	0.00338409	0.00546448	0.00961538	0.0053286	0.0123762	0.00492611	0.0142045	0.0070922	0.00930233	0.0205279	0.00545455	0.00543478	0.00646552	0.0197269	0.0163934	0.00533333	0.0100756	0.00701754	0.00587659	0.0107349	0.00455581	0.00744048	0.00379267	0.00484966	0.006628	0.00297619	0.00645578	0.009	0.00585938	0.00629723	0.0145349	0.00675676	0.00981461	0.00967118	0.00712251	0.00989011
INSIG1_1	ttttttttttctttttt	922	0.00892857	0.0126582	0.00712251	0.00736196	0.00284091	0.00507614	0.0160428	0.00772201	0.00655022	0.00539084	0.0110701	0.0118443	0.0122951	0	0.0071048	0.00247525	0.00246305	0.0113636	0.0170213	0.0108527	0	0.00363636	0.00543478	0.0150862	0.0091047	0.00364299	0.008	0.00587741	0.0175439	0.00881489	0.00578035	0.022779	0.00446429	0.0126422	0.0029098	0.0057995	0.0133929	0.00451904	0.008	0.00585938	0.0125945	0.0116279	0.00844595	0.00545256	0.0135397	0.0014245	0.00879121
INSIG1_1	tttttttttttcttttt	891	0.00669643	0.00316456	0.00712251	0.00858896	0.00568182	0.0203046	0.00534759	0.023166	0.00436681	0.00539084	0.0129151	0.0101523	0.00409836	0.00641026	0.0053286	0.0123762	0.00246305	0.00284091	0.0141844	0.00620155	0.0058651	0.00181818	0.00815217	0.00431034	0.0121396	0.010929	0.0133333	0.0117548	0.00526316	0.00881489	0.00990917	0.0205011	0.00446429	0.00758534	0.013579	0.004971	0.00297619	0.0109748	0.012	0.00488281	0.00629723	0.00872093	0.0101351	0.00654308	0.00967118	0.00854701	0.0043956
INSIG1_1	tttttcttttttttttt	785	0.00892857	0.00632911	0.002849	0.0159509	0.00568182	0	0.00534759	0.019305	0.00873362	0.0134771	0.0147601	0.0135364	0.00273224	0.00320513	0.0124334	0.0049505	0.0123153	0	0.00851064	0.0108527	0.00293255	0.00363636	0	0.0118534	0.0136571	0.00364299	0.00533333	0.00839631	0.0105263	0.00881489	0.00825764	0.00683371	0.00892857	0.011378	0.0106693	0.0074565	0.00892857	0.00516462	0.001	0.00488281	0	0.00581395	0.00337838	0.00981461	0.00773694	0.0042735	0.0021978
INSIG1_1	ttttttttttttctttt	776	0.0290179	0	0.011396	0.00736196	0.015625	0	0.00713012	0.015444	0.00873362	0.00539084	0.00922509	0.00676819	0.00956284	0.025641	0.0124334	0.0123762	0.00738916	0	0.00141844	0.00310078	0	0.00727273	0.00543478	0.00862069	0.0136571	0.00364299	0.00533333	0.00839631	0.00701754	0.00391773	0.0115607	0.00455581	0.0119048	0.00884956	0.00969932	0.0024855	0.00595238	0.00322789	0.005	0.00390625	0.00503778	0.0174419	0.0101351	0.0109051	0.00386847	0.011396	0.00549451
INSIG1_1	ttttttttttttttctt	772	0.00892857	0.0221519	0.002849	0.00122699	0.00852273	0	0.00891266	0	0.00873362	0.00539084	0.0184502	0.00676819	0.00819672	0.00641026	0.0053286	0.0123762	0.00246305	0.00284091	0.00567376	0.00775194	0.00293255	0.0181818	0.00543478	0.00215517	0.00758725	0.00364299	0.008	0.0125945	0.00350877	0.00587659	0.00495458	0.0159453	0.00297619	0.00505689	0.00484966	0.004971	0.00297619	0.00774693	0.005	0.00878906	0.00503778	0.00872093	0.0152027	0.00436205	0.0125725	0.0042735	0.0021978
INSIG1_1	ttttctttttttttttt	759	0.00223214	0.00632911	0.0128205	0.00245399	0.00568182	0.0304569	0.00713012	0	0.00655022	0.00539084	0.00922509	0.00338409	0.00546448	0.00641026	0.0053286	0.0049505	0.0123153	0.0142045	0.00567376	0.00930233	0	0.0272727	0.013587	0.00323276	0.00455235	0.0127505	0.0106667	0.0117548	0.00350877	0.00587659	0.00825764	0.0022779	0.00446429	0.00758534	0.00387973	0.0091135	0	0.00387347	0.004	0.00976562	0.00881612	0.00581395	0.00844595	0.00545256	0.00773694	0.0014245	0.00879121
INSIG1_1	tttttttcttttttttt	741	0.0111607	0	0.002849	0.00490798	0.00710227	0	0.00713012	0.003861	0.00436681	0	0.0147601	0.00507614	0.00819672	0.00320513	0	0.0049505	0.0123153	0.00568182	0.0113475	0.00775194	0	0.00909091	0.00271739	0.00215517	0.0060698	0.00364299	0.0106667	0.00671704	0.0122807	0.0117532	0.0107349	0.00683371	0.00744048	0.00884956	0.00193986	0.0207125	0.0119048	0.00903809	0.009	0.00683594	0.00503778	0.0145349	0.00844595	0.00109051	0.00483559	0.0042735	0.0032967
INSIG1_1	tttttttttttttcttt	737	0.00669643	0.00949367	0.00854701	0.00858896	0.00568182	0	0.00713012	0.00772201	0.0131004	0.00808625	0.00369004	0.00338409	0	0.025641	0.0053286	0.00247525	0	0.0113636	0.00992908	0.00775194	0.0058651	0.00363636	0.00543478	0.00431034	0.0060698	0	0.00533333	0.00755668	0.0175439	0.00783546	0.00412882	0.00455581	0.00744048	0.00252845	0.00484966	0.013256	0.00595238	0.00516462	0.002	0.0136719	0.0151134	0.00145349	0.00337838	0.0130862	0.00773694	0.00569801	0.00879121
INSIG1_1	tcttttttttttttttt	690	0.00446429	0.00632911	0.011396	0.00490798	0.00284091	0.0203046	0.00356506	0	0.010917	0.00269542	0.00553506	0.00169205	0.00273224	0.00641026	0.00888099	0.00742574	0.0147783	0.0142045	0.00283688	0.0108527	0.00293255	0.00909091	0	0.00646552	0.0060698	0.00910747	0	0.00755668	0.00350877	0.00391773	0.00330306	0	0.00892857	0.00379267	0.00484966	0.0041425	0.00595238	0.00451904	0.001	0.00976562	0.00125945	0.00581395	0.00506757	0.00763359	0.00386847	0.00569801	0.0021978
INSIG1_1	tttcttttttttttttt	644	0.00223214	0	0.00569801	0.00736196	0.00710227	0.00507614	0.00534759	0	0	0.00269542	0.00553506	0.0118443	0.00819672	0.00320513	0.0071048	0.0049505	0.00492611	0.00568182	0.00425532	0.00155039	0.00293255	0.00545455	0.00271739	0.00431034	0.0030349	0.00728597	0.008	0.00587741	0.00350877	0.00587659	0.00247729	0.0113895	0.00446429	0.011378	0.00581959	0.001657	0.00446429	0.00258231	0.013	0.00683594	0.00503778	0.00581395	0.00337838	0.0087241	0.00580271	0.0042735	0.0043956
INSIG1_1	tttttttttttttttct	613	0	0.00949367	0.00712251	0.00736196	0.00426136	0.0101523	0.00356506	0.00772201	0.0131004	0.00269542	0.00553506	0.00676819	0.00819672	0.00641026	0.0035524	0.00247525	0.00492611	0.00568182	0.00567376	0.00310078	0.0117302	0.00545455	0	0.00969828	0	0	0.008	0.00671704	0.00877193	0.00391773	0.00825764	0.00683371	0.00744048	0.0126422	0.00387973	0.0074565	0.00446429	0.00451904	0.006	0.00390625	0.00881612	0.00436047	0.00337838	0.00218103	0.00676983	0.0128205	0.00879121
INSIG1_1	ctttttttttttttttt	534	0	0.00316456	0.00569801	0.00858896	0.00568182	0	0.00178253	0.00772201	0.00436681	0.00808625	0	0.00846024	0.00273224	0.00320513	0.0053286	0.00247525	0.00246305	0.00284091	0.00141844	0.00620155	0	0.00727273	0.00543478	0.00107759	0.00151745	0.00182149	0.00266667	0.00503778	0.00350877	0.00195886	0.00660611	0.0022779	0.00446429	0.00505689	0.00387973	0.004971	0.0133929	0.00387347	0.005	0.00390625	0.00251889	0.00581395	0.00337838	0.00436205	0.00773694	0.00712251	0.0021978
INSIG1_1	ttttttctttttttttt	529	0	0.00316456	0.00712251	0.00368098	0.00284091	0	0.00713012	0.003861	0.00218341	0	0.00184502	0.00676819	0.00273224	0.00320513	0.00888099	0.0049505	0.00492611	0.00284091	0.00283688	0.00465116	0.00293255	0.00181818	0.00543478	0.0107759	0.0030349	0	0	0.00167926	0.00175439	0.00685602	0.00578035	0	0.0014881	0.00505689	0.0029098	0.006628	0.00892857	0.00322789	0.004	0.00390625	0.00251889	0.00290698	0.00675676	0.00327154	0.00483559	0.00569801	0.00769231
INSIG1_2	ttttttttttttttttttttttttttttttttttttt	2670	0.545455	0.578947	0.583333	0.681818	0.617647	1	0.782609	0.857143	0.631579	0.772727	0.775	0.458333	0.454545	0.7	0.809524	0.636364	0.875	0.809524	0.842105	0.894737	0.666667	0.923077	0.727273	0.666667	0.684211	0.5	0.6	0.6	0.5	0.8	0.727273	0.888889	0.909091	0.833333	0.8125	0.608696	0.8	0.526316	0.8125	0.5	0.6	0.733333	0.833333	0.777778	0.533333	0.714286	0.535714
INSIG1_2	tttttttttttttttttttttttttttttcttttttt	124	0	0.105263	0.0416667	0.0454545	0.0588235	0	0	0	0.0526316	0.0454545	0.025	0.0416667	0.136364	0.1	0	0.0909091	0	0.047619	0.105263	0	0	0	0	0.0666667	0.0263158	0.227273	0.08	0	0	0	0	0	0	0	0	0.0869565	0.0666667	0	0	0	0.1	0	0	0.0555556	0	0	0.142857
INSIG1_2	tttttttttttttttttttttttttcttttttttttt	60	0	0.105263	0.0416667	0	0	0	0.0434783	0	0.0526316	0	0	0	0	0	0	0	0	0	0	0	0	0.0384615	0	0.0666667	0	0.0454545	0.04	0	0	0	0	0	0	0	0	0	0	0.0526316	0.0625	0	0	0.0666667	0	0.0555556	0	0	0.0357143
INSIG1_2	ttttttttttttttttttttttttctttttttttttt	42	0	0.0526316	0	0	0.0294118	0	0	0	0	0	0	0	0	0	0	0.030303	0	0.047619	0	0.0526316	0	0	0	0	0	0	0	0.025	0	0	0	0	0	0	0.0625	0	0	0.0526316	0	0	0	0	0	0	0	0	0.0357143
INSIG1_2	ttttttttttttttttttttttttttttttttttttc	41	0	0	0	0	0	0	0	0	0	0	0	0	0	0	0	0	0	0	0	0	0	0	0	0	0	0.0454545	0.04	0.025	0	0	0	0	0	0	0	0	0	0	0	0	0	0	0	0	0.133333	0	0
INSIG1_2	ctttttttttttttttttttttttttttttttttttt	35	0	0	0	0	0	0	0	0	0.0526316	0	0.025	0.0416667	0	0	0	0	0	0	0	0	0	0	0	0	0	0	0	0.025	0	0.2	0	0	0	0	0	0	0	0	0	0	0	0	0	0	0.0666667	0	0.0357143
INSIG1_2	ttttttttttttttttttttttttttctttttttttt	35	0	0	0.0416667	0	0	0	0	0	0	0	0	0	0	0	0	0	0	0	0	0.0526316	0	0	0	0	0.0263158	0	0	0.025	0	0	0	0	0	0.0333333	0	0.0434783	0	0	0	0	0	0.133333	0	0	0	0.0714286	0
INSIG1_2	tttttttttttttttttttttttttttcttttttttt	32	0.0454545	0.0526316	0	0	0	0	0	0.0714286	0	0	0	0.0416667	0	0	0	0	0	0	0	0	0	0	0	0	0	0	0.04	0	0	0	0	0	0	0	0	0	0	0	0	0	0	0	0	0	0	0	0
INSIG1_2	tttttttttcttttttttttttttttttttttttttt	30	0	0	0	0	0	0	0	0	0	0	0	0.0416667	0	0	0	0	0.125	0	0	0	0	0	0	0	0	0	0.04	0	0	0	0	0	0	0	0	0.0434783	0	0	0	0	0.1	0	0	0	0	0	0
INSIG1_2	ttttttctttttttttttttttttttttttttttttt	29	0	0	0	0	0.0294118	0	0	0	0	0	0.05	0.0416667	0	0	0	0	0	0	0	0	0	0	0	0	0	0	0	0	0	0	0	0	0	0	0	0	0	0	0	0	0	0	0	0	0	0	0
INSIG1_2	tcttttttttttttttttttttttttttttttttttt	28	0.0454545	0	0	0.0454545	0	0	0	0	0	0	0.025	0	0	0.1	0	0	0	0	0	0	0	0	0.0909091	0	0	0	0	0	0	0	0	0	0	0	0	0.0434783	0	0	0.0625	0	0	0	0	0	0	0	0.0357143
INSIG1_2	tttttttttttttttttttcttttttttttttttttt	27	0	0	0	0	0	0	0	0	0	0	0	0	0	0	0	0	0	0.047619	0	0	0	0	0	0	0	0	0	0	0	0	0.0909091	0	0	0	0	0	0	0.0526316	0	0	0	0	0	0	0	0	0.0357143
INSIG1_2	tttttttttttttcttttttttttttttttttttttt	26	0.0454545	0	0	0	0	0	0	0	0	0	0	0.0416667	0.136364	0	0	0	0	0	0	0	0.111111	0	0	0	0	0	0.04	0	0	0	0	0	0	0	0	0	0	0	0	0	0	0	0	0	0	0.0714286	0.0357143
INSIG1_2	tttttttttttttttttttttttttttttttttcttt	25	0	0	0.0416667	0	0.0294118	0	0	0	0	0	0.025	0	0.0454545	0	0.047619	0	0	0	0	0	0	0	0	0	0.0263158	0	0	0.05	0.25	0	0	0.0555556	0	0	0	0	0	0	0	0	0	0	0	0	0	0	0
INSIG1_2	tttttttcttttttttttttttttttttttttttttt	25	0.0454545	0	0	0	0	0	0	0	0	0	0.025	0.0416667	0	0	0	0	0	0	0	0	0	0	0	0	0	0	0	0	0	0	0	0	0	0	0	0	0	0	0	0	0	0	0	0	0	0	0
INSIG1_2	tttttttttttttttttttttttcttttttttttttt	24	0	0	0	0	0	0	0	0	0	0	0	0	0	0	0	0.030303	0	0	0	0	0	0	0	0	0	0	0	0	0	0	0	0	0	0	0.0625	0	0.0666667	0.0526316	0	0	0	0	0	0	0	0	0
INSIG1_2	tttttcttttttttttttttttttttttttttttttt	24	0	0.0526316	0	0	0	0	0	0	0	0.0454545	0	0.0416667	0	0	0	0.030303	0	0	0	0	0	0	0	0	0	0.0454545	0	0	0	0	0	0	0.0909091	0	0	0	0	0	0	0	0	0	0	0	0.0666667	0	0
INSIG1_2	ttttttttttttttttttttttttttttctttttttt	23	0	0	0	0	0	0	0	0	0	0	0	0	0	0	0	0	0	0	0	0	0	0	0	0	0	0	0	0	0	0	0	0	0	0.0333333	0	0	0	0.0526316	0	0.25	0.1	0	0	0	0	0	0
INSIG1_2	ttttttttttttttttttttttctttttttttttttt	23	0	0	0	0	0	0	0	0.0714286	0.0526316	0	0	0	0	0	0	0	0	0	0	0	0	0	0	0.0666667	0.0526316	0	0	0	0	0	0	0	0	0	0	0	0	0	0.0625	0	0	0	0	0	0	0	0.0357143
INSIG1_2	ttttttttttttttttttttttttttttttttttctt	23	0.0454545	0	0	0	0	0	0	0	0	0	0	0.0833333	0	0	0	0	0	0	0	0	0	0	0	0	0.0263158	0.0454545	0	0	0	0	0	0	0	0	0	0	0	0	0	0	0	0	0	0	0.0666667	0	0
INSIG1_2	ttttttttttttttttttttctttttttttttttttt	22	0	0	0	0	0	0	0	0	0	0	0	0	0	0	0	0	0	0	0	0	0	0	0	0	0.0526316	0	0	0	0	0	0	0	0	0	0	0	0	0	0	0	0	0	0	0	0	0	0
INSIG1_2	ttttttttttttttttttttttttttttttttctttt	22	0	0	0	0	0	0	0	0	0.0526316	0	0	0	0	0	0	0	0	0	0	0	0	0	0	0	0	0	0	0	0	0	0	0	0	0.0333333	0	0	0	0.0526316	0	0	0	0	0	0	0	0	0
INSIG1_2	tttttttttttttttcttttttttttttttttttttt	22	0	0	0.0416667	0	0	0	0	0	0	0	0	0	0	0	0	0	0	0	0	0	0	0	0	0	0.0263158	0	0.04	0.025	0	0	0	0	0	0.0333333	0	0	0	0	0	0.25	0	0	0.166667	0	0	0	0
INSIG1_2	tttttttttttttttttcttttttttttttttttttt	21	0	0	0	0	0.0588235	0	0	0	0	0	0	0	0	0	0	0.0606061	0	0	0	0	0	0	0	0	0	0	0	0.025	0	0	0	0	0	0	0	0	0	0	0	0	0.1	0	0	0	0	0	0
INSIG1_2	ttttttttttttttttttctttttttttttttttttt	20	0	0	0.0416667	0	0	0	0	0	0	0	0	0	0	0	0	0.030303	0	0	0	0	0	0	0	0	0	0.0454545	0	0	0	0	0	0	0	0	0	0	0	0.0526316	0	0	0	0	0	0	0	0.0714286	0
INSIG1_2	tttttttttttttttttttttttttttttttttttct	20	0.0454545	0.0526316	0	0	0	0	0	0	0	0	0	0	0.0454545	0	0	0	0	0	0	0	0	0	0	0.0666667	0	0	0	0	0	0	0	0	0	0	0.0625	0.0434783	0	0.0526316	0	0	0	0	0	0	0	0	0
INSIG1_2	tttttttttttttttttttttttttttttttcttttt	19	0	0	0.0416667	0	0	0	0	0	0	0	0.025	0	0	0	0.047619	0	0	0.047619	0	0	0.111111	0.0384615	0.0909091	0	0	0	0.04	0	0.25	0	0	0	0	0	0	0	0	0	0	0	0	0	0	0	0	0	0
INSIG1_2	ttctttttttttttttttttttttttttttttttttt	19	0	0	0	0	0	0	0	0	0	0	0.025	0	0	0	0	0	0	0	0.0526316	0	0	0	0	0	0	0	0	0	0	0	0	0	0	0	0	0	0	0	0	0	0	0	0	0	0	0	0
INSIG1_2	tttttttttttttttttttttcttttttttttttttt	19	0	0	0.0416667	0	0	0	0.0434783	0	0	0	0	0	0	0	0.047619	0	0	0	0	0	0	0	0	0	0	0	0	0	0	0	0	0	0	0	0	0	0	0	0	0	0	0	0	0	0	0	0
INSIG1_2	ttttttttttttttttttttttttttttttctttttt	18	0	0	0	0	0	0	0	0	0	0	0	0	0	0.1	0	0	0	0	0	0	0	0	0	0	0	0	0.04	0	0	0	0	0	0	0	0	0	0	0	0	0	0	0	0	0	0.0666667	0	0
INSIG1_2	ttttttttttttctttttttttttttttttttttttt	18	0	0	0	0.0454545	0	0	0.0434783	0	0.0526316	0.0454545	0	0	0	0	0	0	0	0	0	0	0	0	0	0.0666667	0	0	0	0	0	0	0	0	0	0	0	0	0	0	0	0	0	0	0	0	0	0	0
INSIG1_2	ttttttttttctttttttttttttttttttttttttt	17	0	0	0	0	0	0	0	0	0	0	0	0	0	0	0	0	0	0	0	0	0	0	0	0	0	0	0	0	0	0	0	0	0	0	0	0	0	0.0526316	0	0	0	0	0	0	0	0	0
INSIG1_2	ttttttttttttttttctttttttttttttttttttt	16	0.0454545	0	0	0	0	0	0.0434783	0	0	0	0	0	0	0	0	0.030303	0	0	0	0	0	0	0	0	0	0	0	0.025	0	0	0	0	0	0	0	0	0	0	0	0	0	0	0	0	0	0	0
INSIG1_2	tttcttttttttttttttttttttttttttttttttt	16	0	0	0.0416667	0	0	0	0	0	0	0	0	0	0.0454545	0	0	0	0	0	0	0	0	0	0	0	0	0.0454545	0	0	0	0	0	0	0	0	0	0	0	0	0	0	0	0	0	0	0	0	0
INSIG1_2	ttttctttttttttttttttttttttttttttttttt	16	0	0	0	0	0	0	0	0	0	0	0	0	0	0	0.047619	0	0	0	0	0	0	0	0	0	0	0	0	0.025	0	0	0	0	0	0	0	0	0	0	0	0	0	0	0	0	0	0	0
INSIG1_2	ttttttttttttttctttttttttttttttttttttt	16	0	0	0	0	0	0	0	0	0	0	0	0	0	0	0	0	0	0	0	0	0	0	0	0	0.0263158	0	0	0.025	0	0	0	0	0	0	0	0	0	0	0	0	0	0	0	0	0	0	0
INSIG1_2	ttttttttctttttttttttttttttttttttttttt	10	0	0	0	0	0	0	0	0	0	0	0	0.0416667	0	0	0	0	0	0	0	0	0	0	0	0	0	0	0	0	0	0	0	0	0	0	0	0	0.0666667	0	0	0	0	0	0	0	0	0	0
INSIG1_2	tttttttttttcttttttttttttttttttttttttt	9	0.0454545	0	0	0	0	0	0	0	0	0	0	0	0	0	0	0	0	0	0	0	0	0	0	0	0	0	0	0	0	0	0	0	0	0	0	0	0	0	0	0	0	0	0	0	0	0	0
INSIG1_2	ttttttttttttttttttttttttcttttcttttttt	6	0	0	0	0	0	0	0	0	0	0	0	0	0	0	0	0	0	0	0	0	0	0	0	0	0	0	0	0	0	0	0.0909091	0	0	0	0	0	0	0	0	0	0	0	0	0	0	0	0
INSIG1_2	tttttttttttttttttttttttttctttcttttttt	4	0	0	0	0	0	0	0	0	0	0	0	0	0	0	0	0	0	0	0	0	0	0	0	0	0.0263158	0	0	0.025	0	0	0	0	0	0	0	0	0	0	0	0	0	0	0	0	0	0	0
INSIG1_2	ttttttcttttttcttttttttttttttttttttttt	4	0	0	0	0	0.0294118	0	0	0	0	0	0	0	0	0	0	0	0	0	0	0	0	0	0	0	0	0	0	0	0	0	0	0	0	0	0	0	0	0	0	0	0	0	0	0	0	0	0
INSIG1_2	ttttttttttttttttttttttcttttttcttttttt	3	0	0	0	0	0	0	0	0	0	0	0	0	0	0	0	0	0	0	0	0	0	0	0	0	0	0	0	0	0	0	0	0	0	0	0	0	0	0	0	0	0	0	0	0	0	0	0
INSIG1_2	tttttttttttttttttttttttttcctttttttttt	2	0	0	0	0	0	0	0	0	0	0	0	0	0	0	0	0	0	0	0	0	0	0	0	0	0	0	0	0	0	0	0	0	0	0	0	0	0	0	0	0	0	0	0	0	0	0	0
INSIG1_2	ttttttttttttttttttttttttttcttcttttttt	2	0	0	0	0	0	0	0	0	0	0	0	0	0	0	0	0	0	0	0	0	0	0	0	0	0	0	0	0	0	0	0	0	0	0	0	0	0	0	0	0	0	0	0	0	0	0	0
INSIG1_2	ttttttttttttttttttttcttttttttcttttttt	2	0	0	0	0	0	0	0	0	0	0	0	0	0	0	0	0	0	0	0	0	0	0	0	0	0	0	0	0	0	0	0	0	0	0	0	0	0	0	0	0	0	0	0	0.0555556	0	0	0
INSIG1_2	ttttttttcttttttttttttttttcttttttttttt	2	0	0	0	0	0	0	0	0	0	0	0	0	0	0	0	0	0	0	0	0	0	0	0	0	0	0	0	0	0	0	0	0	0	0	0	0	0	0	0	0	0	0	0	0	0	0	0
INSIG1_2	ttttttttttttttttttttctttttttttttctttt	2	0	0	0	0	0.0294118	0	0	0	0	0	0	0	0	0	0	0	0	0	0	0	0	0	0	0	0	0	0	0	0	0	0	0	0	0	0	0	0	0	0	0	0	0	0	0	0	0	0
INSIG1_2	ttttttcttttttttttttttttttcttttttttttc	1	0	0	0	0	0	0	0	0	0	0	0	0	0	0	0	0	0	0	0	0	0	0	0	0	0	0	0	0.025	0	0	0	0	0	0	0	0	0	0	0	0	0	0	0	0	0	0	0
INSIG1_2	ttttttttttttcttttttttttttttttcttttttt	1	0	0	0	0	0	0	0	0	0	0	0	0	0	0	0	0	0	0	0	0	0	0	0	0	0	0	0	0	0	0	0	0	0	0	0	0	0	0	0	0	0	0	0	0	0	0	0
INSIG1_2	tttcttttttttttttttttttttctttttttttttt	1	0	0	0	0	0	0	0	0	0	0	0	0	0	0	0	0	0	0	0	0	0	0	0	0	0	0	0	0	0	0	0	0	0	0	0	0	0	0	0	0	0	0	0	0	0	0	0
INSIG1_2	cttttttttttttttttttttttttttttcttttttt	1	0	0	0	0	0	0	0	0	0	0	0	0	0	0	0	0	0	0	0	0	0	0	0	0	0	0	0	0	0	0	0	0	0	0	0	0	0	0	0	0	0	0	0	0	0	0	0
INSIG1_2	tttttttttttttttttttttttttctcttttttttt	1	0	0	0	0	0	0	0	0	0	0	0	0	0	0	0	0	0	0	0	0	0	0	0	0	0	0	0	0	0	0	0	0	0	0	0	0	0	0	0	0	0	0	0	0	0	0	0
INSIG1_2	ttttttttttttttttccttttttttttttttttttt	1	0.0454545	0	0	0	0	0	0	0	0	0	0	0	0	0	0	0	0	0	0	0	0	0	0	0	0	0	0	0	0	0	0	0	0	0	0	0	0	0	0	0	0	0	0	0	0	0	0
INSIG1_2	tttttttttcttttttcttttttttttttctttttct	1	0	0	0	0	0	0	0	0	0	0	0	0	0	0	0	0	0	0	0	0	0	0	0	0	0	0	0	0	0	0	0	0	0	0	0	0	0	0	0	0	0	0	0	0	0	0	0
INSIG1_2	tttttttttttcttttttttttttttctttttttttt	1	0	0	0	0.0454545	0	0	0	0	0	0	0	0	0	0	0	0	0	0	0	0	0	0	0	0	0	0	0	0	0	0	0	0	0	0	0	0	0	0	0	0	0	0	0	0	0	0	0
INSIG1_2	tctttcttttttttttttttttttttttttttttttt	1	0	0	0	0	0	0	0	0	0	0	0	0	0	0	0	0	0	0	0	0	0.111111	0	0	0	0	0	0	0	0	0	0	0	0	0	0	0	0	0	0	0	0	0	0	0	0	0	0
INSIG1_2	tttttttttttttttctttttcttttttttttttctt	1	0	0	0	0	0	0	0	0	0	0	0	0	0	0	0	0	0	0	0	0	0	0	0	0	0	0	0	0	0	0	0.0909091	0	0	0	0	0	0	0	0	0	0	0	0	0	0	0	0
INSIG1_2	ttctttttcttttttttttttttttttttcttttttt	1	0	0	0	0	0	0	0	0	0	0	0	0	0	0	0	0	0	0	0	0	0	0	0	0	0	0	0	0	0	0	0	0	0	0	0	0	0	0	0	0	0	0	0	0	0	0	0
INSIG1_2	ttttcttttttttttttttcttttttttttttttttt	1	0	0	0	0	0	0	0	0	0	0	0	0	0	0	0	0	0	0	0	0	0	0	0	0	0	0	0	0	0	0	0	0	0	0	0	0	0	0	0	0	0	0	0	0	0	0	0
INSIG1_2	tttttttttttttttttttttttttttttctttttct	1	0	0	0	0	0	0	0	0	0	0	0	0	0	0	0	0	0	0	0	0	0	0	0	0	0	0	0	0	0	0	0	0	0	0	0	0	0	0	0	0	0	0	0	0	0	0	0
INSIG1_2	ttcttttttttttttttttttttttttttcttttttt	1	0	0	0	0	0	0	0	0	0	0	0	0	0	0	0	0	0	0	0	0	0	0	0	0	0	0	0	0	0	0	0	0	0	0	0	0	0	0	0	0	0	0	0	0	0	0	0
INSIG1_2	tttttttttcttttttttttttttccttttttttttt	1	0	0	0	0	0	0	0	0	0	0	0	0	0	0	0	0	0	0	0	0	0	0	0	0	0	0	0	0	0	0	0	0	0	0	0	0.0434783	0	0	0	0	0	0	0	0	0	0	0
INSIG1_2	ttcttttttttttttttttttttctcttctttttttt	1	0	0	0	0	0	0	0	0	0	0	0	0	0	0	0	0	0	0	0	0	0	0	0	0	0	0	0	0	0	0	0	0	0	0	0	0	0	0	0	0	0	0	0	0	0	0	0
INSIG1_2	ttttttcttttttttttctttttttttttcttttttt	1	0	0	0	0	0	0	0	0	0	0	0	0	0	0	0	0	0	0	0	0	0	0	0	0	0	0	0	0	0	0	0	0.0555556	0	0	0	0	0	0	0	0	0	0	0	0	0	0	0
INSIG1_2	ttctttttttttttttttctttttttttttttttttt	1	0	0	0	0	0	0	0	0	0	0	0	0	0	0	0	0	0	0	0	0	0	0	0	0	0	0	0	0	0	0	0	0	0	0	0	0	0	0	0	0	0	0	0	0	0	0	0
INSIG1_2	tcttttttttttttttttttttctttttttttttttt	1	0	0	0	0	0	0	0	0	0	0	0	0	0	0	0	0	0	0	0	0	0	0	0	0	0	0	0	0	0	0	0	0	0	0	0	0	0	0	0	0	0	0	0	0	0	0	0
INSIG1_2	ttttttcttttttttttttttttttttttcttttttt	1	0	0	0	0	0	0	0	0	0	0	0	0	0	0	0	0	0	0	0	0	0	0	0	0	0	0	0	0	0	0	0	0	0	0	0	0	0	0	0	0	0	0	0	0	0	0	0
INSIG1_2	tttttctttttttttttttttttttttcttttttttt	1	0	0	0	0	0	0	0	0	0	0	0	0	0	0	0	0	0	0	0	0	0	0	0	0	0	0	0	0	0	0	0	0	0	0	0	0	0	0	0	0	0	0	0	0	0	0.0714286	0
INSIG1_2	tttttttttttttttcttttttttttttctttttttt	1	0	0	0	0	0	0	0	0	0	0	0	0	0	0	0	0	0	0	0	0	0	0	0	0	0	0	0	0	0	0	0	0	0	0	0	0	0	0	0	0	0	0	0	0	0	0	0
INSIG1_2	tttttttttttttttttttcttttctttttttttttt	1	0	0	0	0	0	0	0	0	0	0	0	0	0	0	0	0	0	0	0	0	0	0	0	0	0	0	0	0	0	0	0	0	0	0	0	0	0	0	0	0	0	0	0	0	0	0	0
INSIG1_2	ttttttcttttttctttcttttttttttctttttttt	1	0	0	0	0	0	0	0	0	0	0	0	0	0	0	0	0	0	0	0	0	0	0	0	0	0	0	0	0	0	0	0	0	0	0	0	0	0	0	0	0	0	0	0	0	0	0	0
INSIG1_2	tttctttttttttttttttcttttttttttttttttt	1	0	0	0.0416667	0	0	0	0	0	0	0	0	0	0	0	0	0	0	0	0	0	0	0	0	0	0	0	0	0	0	0	0	0	0	0	0	0	0	0	0	0	0	0	0	0	0	0	0
INSIG1_2	tttttttttttttctttttttttcttttttttttttt	1	0	0	0	0	0	0	0	0	0	0	0	0	0	0	0	0	0	0	0	0	0	0	0	0	0	0	0	0	0	0	0	0	0	0	0	0	0	0	0	0	0	0	0	0	0	0	0
INSIG1_3	tttttttttttttttt	168010	0.9	0.896708	0.873786	0.894675	0.900088	0.904372	0.867358	0.888288	0.879373	0.860271	0.870719	0.870748	0.884654	0.878661	0.87109	0.873239	0.879863	0.890973	0.90297	0.879344	0.851852	0.907754	0.872768	0.890511	0.874291	0.89183	0.88161	0.870775	0.902576	0.889169	0.871958	0.855337	0.829684	0.831304	0.892068	0.870147	0.854512	0.88587	0.840943	0.841573	0.872709	0.866058	0.861249	0.870837	0.891202	0.901896	0.877969
INSIG1_3	tttttttttttttctt	2271	0.0122449	0.00681044	0.00693481	0.00828402	0.00530504	0.00273224	0.0196891	0.0108108	0.00844391	0.0260688	0.0162671	0.0136054	0.0341023	0.013947	0.0151659	0.0215962	0.0114416	0.0128957	0.0138614	0.00675676	0.0164609	0	0.00446429	0.013382	0.0141777	0.0103567	0.0102605	0.00530152	0.00335946	0.00923594	0.00846561	0.0126404	0.0145985	0.0104348	0.0130039	0.0200803	0.0184162	0.0173913	0.00441826	0.0179775	0.00610998	0.0129376	0.0158573	0.00568643	0.00851466	0.00741962	0.003276
INSIG1_3	ttttttttcttttttt	1898	0.0122449	0.00908059	0.00970874	0.0118343	0.00884173	0	0.00621762	0.00540541	0.0108565	0.0114703	0.0111301	0.0136054	0.0100301	0.0027894	0.00758294	0.0103286	0.0160183	0.00586166	0.00594059	0.00675676	0.0123457	0.0120321	0.0111607	0.00851582	0.0113422	0.00460299	0.0228887	0.010603	0.00335946	0	0.00952381	0.00983146	0.00729927	0.013913	0.00780234	0.00803213	0.00736648	0.0076087	0.0147275	0.0146067	0.0234216	0.00913242	0.0188305	0.0154346	0.00756859	0.00906843	0.00819001
INSIG1_3	ttttttcttttttttt	1527	0.00714286	0.00681044	0.00416089	0.00473373	0.00265252	0.0163934	0.0134715	0.00540541	0.00723764	0.012513	0.00513699	0.00291545	0.00601805	0.0013947	0.00947867	0.00657277	0.00915332	0.00820633	0.00990099	0.00965251	0.0144033	0.00802139	0.00669643	0.00608273	0.0132325	0.0103567	0.00394633	0.010603	0.00335946	0.00503778	0.00740741	0.0196629	0.00973236	0.00521739	0.00910273	0.00803213	0.00552486	0.00543478	0.0191458	0.0011236	0.0112016	0.0106545	0.00297324	0.00974817	0.00662252	0.00494641	0.004095
INSIG1_3	cttttttttttttttt	1510	0.00204082	0.00908059	0.0124827	0.00236686	0.00884173	0.00546448	0.011399	0.00900901	0.00723764	0.00729927	0.00428082	0.01069	0.00501505	0.0083682	0.00853081	0.00751174	0.00686499	0.003517	0.00594059	0.00772201	0.00823045	0.0160428	0.00669643	0.00486618	0.0047259	0.00575374	0.00868193	0.00927767	0.00895857	0.0134341	0.021164	0.00561798	0	0.0278261	0.0130039	0.00937082	0.00552486	0.00652174	0.00736377	0.00786517	0.00203666	0.0114155	0.0109019	0.00243704	0.012299	0.012366	0.00819001
INSIG1_3	ttttttttttttttct	1379	0.00102041	0.00113507	0.0110957	0.00710059	0.00442087	0.0136612	0.00725389	0.00540541	0.00482509	0.0114703	0.010274	0.00874636	0.00601805	0.0111576	0.00853081	0.00187793	0.00228833	0.00117233	0.00594059	0.00772201	0.0102881	0.0040107	0.015625	0.00608273	0.00661626	0.00345224	0.00394633	0.00662691	0.00447928	0.00503778	0.00740741	0.00702247	0.00973236	0.0104348	0.00780234	0.0147256	0.0276243	0.00543478	0.00441826	0.0123596	0.0101833	0.00456621	0.0188305	0.00812348	0.00756859	0.00577082	0.00900901
INSIG1_3	ttttttttttttcttt	1337	0.00306122	0.00908059	0.00693481	0.0035503	0.00530504	0.00273224	0.00518135	0.0126126	0.00965018	0.00521376	0.00513699	0.00777454	0.00601805	0.0237099	0.00853081	0.0056338	0.00572082	0.00820633	0.0039604	0.00579151	0.00823045	0.0013369	0.0178571	0.00486618	0.00378072	0.00690449	0.00868193	0.00596421	0.00335946	0.00923594	0.0021164	0.00983146	0.00729927	0.0173913	0.00520156	0.00267738	0.00184162	0	0.00441826	0.00561798	0.00305499	0.0114155	0.00396432	0.00649878	0.00189215	0.00659522	0.004914
INSIG1_3	tttttttttttttttc	1333	0.00204082	0.0124858	0.0110957	0.00591716	0.00618921	0	0.00932642	0.00720721	0.00844391	0.00625652	0.00684932	0.00485909	0.00401204	0.013947	0.0113744	0.0084507	0.00228833	0.00586166	0.00891089	0.00965251	0.00205761	0.0026738	0.00669643	0.00973236	0.0132325	0.0103567	0.0023678	0.00795229	0.0111982	0.00587741	0.00846561	0.0154494	0.00486618	0.00347826	0.00650195	0.00267738	0.00184162	0.00652174	0.00883652	0.0168539	0.00509165	0.00761035	0.0049554	0.0105605	0.00473037	0.00577082	0.015561
INSIG1_3	tttttttctttttttt	1260	0.00918367	0.00681044	0.00554785	0.00710059	0.00530504	0.00273224	0.00621762	0.00540541	0.00482509	0.00312826	0.00941781	0.0126336	0.00200602	0.0041841	0.00853081	0.00751174	0.0114416	0.00234467	0.00594059	0.00772201	0	0.0106952	0.00892857	0.00973236	0.00283554	0.00805524	0.0134175	0.00331345	0.00335946	0.00671704	0.00529101	0.00983146	0.00486618	0.00695652	0.00520156	0.00267738	0.00552486	0.00869565	0.0103093	0.0157303	0.00203666	0.00608828	0.00594648	0.00812348	0.013245	0.00659522	0.004095
INSIG1_3	ttttcttttttttttt	1236	0.00510204	0.00340522	0.0110957	0.00118343	0.00884173	0	0.00310881	0.0108108	0.0120627	0.00312826	0.00770548	0.00194363	0.00601805	0.0027894	0.00379147	0.00657277	0.00800915	0.003517	0.0039604	0.00965251	0.0102881	0.0026738	0.00223214	0.00486618	0.00661626	0.00920598	0.00315706	0.00596421	0.00895857	0.0134341	0.010582	0	0.0194647	0.0191304	0.00520156	0.00937082	0.00368324	0.0130435	0.0265096	0.00561798	0.0152749	0.0106545	0.0099108	0.00406174	0.00567644	0.00741962	0.00655201
INSIG1_3	tttttttttttctttt	1204	0.00510204	0.00681044	0.00416089	0.00710059	0.00353669	0.00273224	0.00829016	0.0018018	0.00965018	0.00729927	0.00684932	0.0058309	0.00200602	0.0027894	0.00473934	0.00375587	0.00800915	0.003517	0.0029703	0.00482625	0.00823045	0.00668449	0.00223214	0.00243309	0.00661626	0.00345224	0.00394633	0.00861498	0	0.00503778	0.00846561	0.00140449	0.0316302	0.0191304	0.00910273	0	0	0.00434783	0.00441826	0.00337079	0.00407332	0.00532725	0.00594648	0.00568643	0.00473037	0.00659522	0.00819001
INSIG1_3	tttttctttttttttt	1189	0.00714286	0.00567537	0.00138696	0.00828402	0.00176835	0.010929	0.00932642	0	0.00482509	0.00312826	0.00513699	0.0136054	0.00401204	0.0041841	0.00379147	0.00938967	0.00228833	0.00586166	0.0029703	0.011583	0.00411523	0.0013369	0.0111607	0.013382	0.0141777	0.00460299	0.00552486	0.0125911	0.00335946	0.00503778	0.0021164	0.00983146	0	0.013913	0.00260078	0.0174029	0.0165746	0.0141304	0.00294551	0.00337079	0.00305499	0.00684932	0.00693756	0.00812348	0.0037843	0.00412201	0.004914
INSIG1_3	tttttttttctttttt	1150	0.00612245	0.00227015	0.00138696	0.00710059	0.00618921	0.0245902	0.00518135	0.00720721	0.00241255	0.00417101	0.00513699	0.00485909	0.00501505	0.0013947	0.00947867	0.0103286	0.00915332	0.00468933	0.0049505	0.00289575	0	0.013369	0.00223214	0.00243309	0.0047259	0.00460299	0.00552486	0.00596421	0.00447928	0.00671704	0.00740741	0	0.00243309	0.0104348	0.00130039	0.00267738	0.00736648	0.00217391	0.00589102	0.0101124	0.00610998	0.00837139	0.0148662	0.00649878	0.00756859	0.00577082	0.00982801
INSIG1_3	tctttttttttttttt	1141	0.00612245	0.00794552	0.0110957	0.00473373	0.00884173	0.00273224	0.00621762	0.00720721	0.00844391	0.00625652	0.00770548	0.00388727	0.00300903	0.0041841	0.00473934	0.00375587	0.00228833	0.007034	0.0039604	0.000965251	0.0144033	0.0026738	0	0.00243309	0.00378072	0.00460299	0.00315706	0.00795229	0.0100784	0.00419815	0.00634921	0.00983146	0.00243309	0	0.00780234	0.00267738	0.0092081	0.0076087	0.00589102	0.00449438	0.0142566	0.00989346	0.00594648	0.00649878	0.00283822	0.00247321	0.00737101
INSIG1_3	tttctttttttttttt	1039	0.00102041	0.00227015	0.00970874	0.00236686	0.00442087	0.00819672	0.00725389	0.00900901	0.00603136	0.00208551	0.00770548	0.00680272	0.00501505	0.0013947	0.0056872	0.00187793	0.00572082	0.0117233	0.0029703	0.00965251	0.0144033	0.0040107	0.0111607	0.00364964	0.00283554	0.00690449	0.00315706	0.0072896	0.0100784	0.00167926	0.00529101	0.00421348	0.00486618	0.00347826	0.00390117	0.00937082	0.00184162	0.00652174	0.00736377	0.0134831	0.00203666	0.00684932	0.00198216	0.00487409	0.00662252	0.00577082	0.003276
INSIG1_3	ttttttttttcttttt	1003	0.00408163	0.00227015	0.00832178	0.0106509	0.00884173	0	0.00518135	0.0018018	0.00241255	0.00625652	0.00342466	0.00680272	0.00300903	0.0069735	0.00663507	0.0028169	0.0102975	0.010551	0.0049505	0.00868726	0.0185185	0.0026738	0.00892857	0.00729927	0.00283554	0.00920598	0.00552486	0.00331345	0.0100784	0.00503778	0.0031746	0.00842697	0	0	0	0.00401606	0.0202578	0.00108696	0.00294551	0.0213483	0.0142566	0.00761035	0.00198216	0.00812348	0.0037843	0.00247321	0.00655201
INSIG1_3	ttcttttttttttttt	892	0.0112245	0.00227015	0.00277393	0.00473373	0.00176835	0	0.00310881	0.0036036	0.00361882	0.0145985	0.00941781	0.0058309	0.00702106	0.0069735	0.00663507	0.0084507	0.00343249	0.00117233	0.0019802	0.0019305	0.00205761	0	0.00892857	0.00486618	0.00378072	0.0023015	0.00710339	0.00530152	0.00335946	0.00839631	0.00634921	0.00421348	0.0218978	0.00173913	0.00520156	0.00267738	0.00552486	0.00326087	0.0191458	0.00224719	0.00305499	0.00304414	0.00693756	0.00812348	0.00567644	0.000824402	0.00900901
INSIG2_	tttttttttt	1193	0.888889	1	0.785714	0.8	0.75	1	0.888889	0.666667	0.5	1	0.76	1	1	1	1	0.857143	0.933333	0.75	0.909091	1	1	1		0.933333	0.714286	0.833333	0.125	0.7	1	1	0.6	1	1	0.666667	1	0.666667		0.25	0.75	1	1	0.666667	0.6	0.8	1	0.75	0.785714
INSIG2_	tctttttttt	178	0.111111	0	0.214286	0.1	0.25	0	0.111111	0.333333	0.5	0	0.16	0	0	0	0	0	0.0666667	0.25	0.0909091	0	0	0		0	0.285714	0.166667	0.25	0.25	0	0	0.4	0	0	0	0	0.333333		0.75	0.25	0	0	0	0.4	0.2	0	0.25	0.0714286
INSIG2_	tttttttttc	14	0	0	0	0	0	0	0	0	0	0	0	0	0	0	0	0	0	0	0	0	0	0		0	0	0	0.625	0	0	0	0	0	0	0	0	0		0	0	0	0	0.333333	0	0	0	0	0
INSIG2_	cttttttttt	13	0	0	0	0	0	0	0	0	0	0	0	0	0	0	0	0	0	0	0	0	0	0		0	0	0	0	0	0	0	0	0	0	0	0	0		0	0	0	0	0	0	0	0	0	0
INSIG2_	tttttctttt	11	0	0	0	0.1	0	0	0	0	0	0	0	0	0	0	0	0	0	0	0	0	0	0		0	0	0	0	0	0	0	0	0	0	0.333333	0	0		0	0	0	0	0	0	0	0	0	0
INSIG2_	ttttcttttt	9	0	0	0	0	0	0	0	0	0	0	0.04	0	0	0	0	0	0	0	0	0	0	0		0.0666667	0	0	0	0	0	0	0	0	0	0	0	0		0	0	0	0	0	0	0	0	0	0
INSIG2_	ttcttttttt	9	0	0	0	0	0	0	0	0	0	0	0.04	0	0	0	0	0	0	0	0	0	0	0		0	0	0	0	0	0	0	0	0	0	0	0	0		0	0	0	0	0	0	0	0	0	0.142857
INSIG2_	tttctttttt	9	0	0	0	0	0	0	0	0	0	0	0	0	0	0	0	0.142857	0	0	0	0	0	0		0	0	0	0	0	0	0	0	0	0	0	0	0		0	0	0	0	0	0	0	0	0	0
INSIG2_	tttttttctt	7	0	0	0	0	0	0	0	0	0	0	0	0	0	0	0	0	0	0	0	0	0	0		0	0	0	0	0	0	0	0	0	0	0	0	0		0	0	0	0	0	0	0	0	0	0
INSIG2_	ttttttcttt	5	0	0	0	0	0	0	0	0	0	0	0	0	0	0	0	0	0	0	0	0	0	0		0	0	0	0	0	0	0	0	0	0	0	0	0		0	0	0	0	0	0	0	0	0	0
INSIG2_	ttttttttct	4	0	0	0	0	0	0	0	0	0	0	0	0	0	0	0	0	0	0	0	0	0	0		0	0	0	0	0.05	0	0	0	0	0	0	0	0		0	0	0	0	0	0	0	0	0	0
INSIG2_	tccttttttt	3	0	0	0	0	0	0	0	0	0	0	0	0	0	0	0	0	0	0	0	0	0	0		0	0	0	0	0	0	0	0	0	0	0	0	0		0	0	0	0	0	0	0	0	0	0
INSIG2_	cctttttttt	2	0	0	0	0	0	0	0	0	0	0	0	0	0	0	0	0	0	0	0	0	0	0		0	0	0	0	0	0	0	0	0	0	0	0	0		0	0	0	0	0	0	0	0	0	0
INSIG2_	tttttccttt	1	0	0	0	0	0	0	0	0	0	0	0	0	0	0	0	0	0	0	0	0	0	0		0	0	0	0	0	0	0	0	0	0	0	0	0		0	0	0	0	0	0	0	0	0	0
INSIG2_	tcttcttttt	1	0	0	0	0	0	0	0	0	0	0	0	0	0	0	0	0	0	0	0	0	0	0		0	0	0	0	0	0	0	0	0	0	0	0	0		0	0	0	0	0	0	0	0	0	0
INSIG2_	ttctcttttt	1	0	0	0	0	0	0	0	0	0	0	0	0	0	0	0	0	0	0	0	0	0	0		0	0	0	0	0	0	0	0	0	0	0	0	0		0	0	0	0	0	0	0	0	0	0
INSIG2_	tctttttctt	1	0	0	0	0	0	0	0	0	0	0	0	0	0	0	0	0	0	0	0	0	0	0		0	0	0	0	0	0	0	0	0	0	0	0	0		0	0	0	0	0	0	0	0	0	0
INSIG2_	ttttctttct	1	0	0	0	0	0	0	0	0	0	0	0	0	0	0	0	0	0	0	0	0	0	0		0	0	0	0	0	0	0	0	0	0	0	0	0		0	0	0	0	0	0	0	0	0	0
MBTPS1_1	tttttttttttttt	134612	0.77573	0.783883	0.759825	0.77076	0.787546	0.760766	0.813433	0.836478	0.81681	0.825581	0.777553	0.796012	0.740299	0.823322	0.8051	0.748377	0.818182	0.771836	0.786667	0.790123	0.812308	0.710183	0.848	0.798837	0.794007	0.799469	0.769231	0.761329	0.788553	0.783856	0.765054	0.813278	0.725455	0.831967	0.79017	0.737775	0.801556	0.816373	0.767626	0.783019	0.793309	0.753488	0.747126	0.800806	0.792327	0.811644	0.798041
MBTPS1_1	tctttttttttttt	17287	0.104455	0.0769231	0.114629	0.123977	0.115995	0.143541	0.0831557	0.0754717	0.0862069	0.055814	0.0980789	0.0935583	0.11194	0.127208	0.0765027	0.131494	0.111688	0.0926916	0.108718	0.108025	0.0738462	0.177546	0.066	0.0662791	0.104869	0.106242	0.11396	0.106747	0.0985692	0.0937292	0.13172	0.0871369	0.107273	0.0724044	0.10334	0.128278	0.120623	0.0868401	0.102158	0.100343	0.0966543	0.116279	0.14751	0.0944157	0.106905	0.0936073	0.0979478
MBTPS1_1	tttttttttttctt	2794	0.015361	0.029304	0.00873362	0.0163743	0.015873	0.0143541	0.0234542	0.0125786	0.00215517	0.00930233	0.0121335	0.00460123	0.0238806	0	0.0163934	0.0146104	0.0103896	0.026738	0.0123077	0.0123457	0.0246154	0.0443864	0.008	0.0232558	0.00374532	0.0106242	0.017094	0.0161128	0.0238474	0.0200133	0.0172043	0.026971	0.0109091	0.010929	0.0132325	0.0120482	0.0252918	0.0118592	0.023741	0.0120069	0.0118959	0.0255814	0.0478927	0.0143926	0.00920716	0.0136986	0.0214552
MBTPS1_1	ttttttttttttct	1970	0.00921659	0.00732601	0.00873362	0.0116959	0.014652	0.00478469	0.010661	0.0125786	0.012931	0.0139535	0.0101112	0.0168712	0.00746269	0.0106007	0.00910747	0.0113636	0.00519481	0.0231729	0.00717949	0.0133745	0.00923077	0.00522193	0.006	0.0151163	0.0237203	0.0146082	0.011396	0.0135952	0.0206677	0.0143429	0.00967742	0.00414938	0.00727273	0.00956284	0.010712	0.0127569	0.00583658	0.00420811	0.0136691	0.0214408	0.0148699	0.00232558	0.00957854	0.0126655	0.00869565	0.010274	0.00839552
MBTPS1_1	ttttttcttttttt	1459	0.015361	0.003663	0.00655022	0.00935673	0.00610501	0.00478469	0.00959488	0.00314465	0.00646552	0.0139535	0.00808898	0.0138037	0.0119403	0.00706714	0.0163934	0.0178571	0.0025974	0.0124777	0.00717949	0.00720165	0.00923077	0.00261097	0.002	0.00581395	0.00374532	0.00132802	0.022792	0.0110775	0.00476948	0.00833889	0.00537634	0.00414938	0.00363636	0.00819672	0.0063012	0.00708717	0	0.00726855	0.00935252	0.0102916	0.00297398	0.00348837	0.00191571	0.00633276	0.00767263	0.010274	0.0051306
MBTPS1_1	tttctttttttttt	1346	0.0138249	0.010989	0.00327511	0.00701754	0.01221	0.00956938	0.00319829	0.00628931	0.00646552	0	0.00404449	0.00306748	0.00447761	0.00706714	0.00546448	0.00649351	0.0025974	0.00713012	0.00923077	0.00720165	0.00923077	0.0104439	0.02	0.0127907	0.00249688	0.00265604	0.00569801	0.00704935	0.00953895	0.00700467	0.00806452	0.00414938	0.0309091	0.00273224	0.00441084	0.00496102	0.00194553	0.00573833	0.00431655	0.0077187	0.0118959	0.0127907	0	0.0103627	0.00460358	0.0114155	0.00559701
MBTPS1_1	cttttttttttttt	1291	0.00921659	0.014652	0.0141921	0.00935673	0.002442	0	0.00319829	0.00628931	0.0150862	0.0139535	0.0101112	0.00613497	0.0104478	0	0	0.00162338	0.0025974	0.00534759	0.00820513	0.00308642	0.00307692	0	0.002	0.00813953	0.00998752	0.00796813	0.00854701	0.0120846	0.00794913	0.00667111	0.00752688	0.0145228	0.0181818	0.00546448	0.0126024	0.0148831	0.0077821	0.00612089	0.00503597	0.00686106	0.00446097	0.00697674	0	0.00633276	0.00971867	0.00114155	0.00746269
MBTPS1_1	ttttcttttttttt	1250	0.0107527	0.014652	0.018559	0.00584795	0.004884	0.0143541	0.0127932	0.00943396	0	0.00930233	0.0091001	0.00920245	0.00447761	0	0.0127505	0.012987	0.012987	0.00713012	0.0102564	0.0102881	0	0.0156658	0.002	0.0104651	0.00374532	0.00929615	0.00569801	0.00855992	0.0063593	0.00466978	0.00537634	0.00622407	0.00909091	0.0068306	0.00441084	0.0120482	0.00194553	0.00650344	0.00863309	0.00686106	0.00817844	0.0139535	0.00574713	0.00633276	0.00358056	0	0.00559701
MBTPS1_1	ttcttttttttttt	1237	0.00768049	0.003663	0.0163755	0.00350877	0.00976801	0	0.0021322	0.00628931	0.00431034	0.0116279	0.00808898	0.00306748	0.0134328	0.00353357	0.010929	0.00974026	0.0103896	0.00356506	0.00717949	0.00720165	0.0123077	0.00261097	0.006	0.00348837	0.00499376	0.00398406	0.00854701	0.0125881	0.00476948	0.00967312	0.00645161	0.00207469	0.00545455	0.0150273	0.00252048	0.0042523	0	0.00612089	0.00791367	0.00600343	0.00446097	0.0104651	0.00191571	0.00690846	0.00716113	0.010274	0.00746269
MBTPS1_1	tttttttctttttt	1082	0.00921659	0.014652	0.00982533	0.00818713	0.014652	0	0.00746269	0.00314465	0.00646552	0.0186047	0.00505561	0.00766871	0.0134328	0	0.0127505	0	0.00779221	0.00356506	0.00615385	0.00514403	0.00615385	0	0.006	0.00348837	0.00374532	0.00398406	0.00569801	0.00553877	0.00953895	0.00700467	0.00645161	0.00622407	0.00727273	0.00409836	0.00819156	0.0113395	0	0.00879878	0.00935252	0.00857633	0.00817844	0.00465116	0	0.00460564	0.00511509	0.00570776	0.00746269
MBTPS1_1	ttttttttcttttt	918	0.00768049	0	0.00545852	0.00350877	0	0	0.00639659	0.00628931	0.00862069	0.00697674	0.00808898	0.00306748	0.0179104	0.00353357	0.00910747	0.00487013	0.00519481	0.00178253	0.00102564	0.00823045	0.00307692	0	0.014	0.00930233	0.00374532	0.00531208	0.002849	0.0060423	0.00317965	0.00400267	0.00537634	0.00207469	0.0109091	0.00546448	0.00693132	0.000708717	0.00583658	0.00267789	0.0057554	0.0025729	0.00148699	0.00581395	0.00191571	0.00345423	0.00460358	0.00342466	0.00326493
MBTPS1_1	tttttctttttttt	873	0.00460829	0.014652	0.00764192	0.00233918	0	0.00956938	0.00746269	0.00314465	0.00646552	0.00697674	0.00505561	0.00613497	0.0164179	0.00706714	0.00182149	0.00487013	0.0025974	0.00356506	0.00512821	0.00617284	0	0	0.002	0.00348837	0.00249688	0.00929615	0.002849	0.00453172	0.00158983	0.00700467	0.00645161	0.00207469	0.0109091	0.0177596	0.00441084	0.00921332	0.00194553	0.00535578	0.00359712	0.0025729	0.00669145	0.00232558	0.00574713	0.00518135	0.00818414	0.00342466	0.00466418
MBTPS1_1	tttttttttctttt	808	0.0030722	0.003663	0.00982533	0.00116959	0.003663	0	0.00639659	0.00314465	0.00431034	0.00232558	0.0131446	0.00153374	0.00597015	0.0106007	0.00364299	0.00487013	0.0025974	0.00891266	0.00307692	0.00205761	0	0.00522193	0.006	0.00348837	0.00249688	0.00132802	0.00569801	0.0060423	0	0.00633756	0.00537634	0.00207469	0	0.00136612	0.00882168	0.0113395	0.00194553	0.00726855	0.00143885	0.00686106	0.00669145	0.0162791	0	0.00518135	0.00409207	0	0.00326493
MBTPS1_1	ttttttttttcttt	789	0.0015361	0.003663	0.00327511	0.00350877	0.004884	0.0191388	0	0.00314465	0.00862069	0	0.00202224	0.00766871	0.00298507	0	0.00728597	0.00649351	0	0.00356506	0.00717949	0.00308642	0.0123077	0.00261097	0.004	0.00465116	0.00499376	0.00265604	0.002849	0.00302115	0.00158983	0.00333556	0.00376344	0.00207469	0.00727273	0	0.00756144	0.00637845	0	0.00497322	0.00503597	0.00943396	0.00892193	0.00465116	0.00574713	0.00115141	0.00409207	0.00456621	0.00466418
MBTPS1_2	tttttttttt	172339	0.845264	0.837047	0.892964	0.866412	0.843173	0.878981	0.84573	0.86733	0.855422	0.872928	0.862915	0.864144	0.854529	0.846014	1	0.854039	0.840063	0.863347	0.837937	0.867257	0.835106	0.900122	0.847001	0.846223	0.846784	0.849887	0.864726	0.854121	0.861244	0.877095	0.829252	0.847788	0.865591	0.884434	0.858543	0.828201	0.786207	0.855615	0.87251	0.875648	0.891455	0.866234	0.828148	0.864407	0.894737	0.900229	0.863994
MBTPS1_2	tctttttttt	4243	0.0231381	0.0292479	0.00973054	0.0167939	0.0307503	0.044586	0.0330579	0.0348259	0.0254351	0.019337	0.021164	0.0206363	0.0448307	0.0271739	0	0.0210455	0.0174188	0.0180085	0.0303867	0.0265487	0.00797872	0.00974421	0.0244798	0.0170863	0.0304094	0.0124153	0.0256849	0.012781	0.0143541	0.0181564	0.0277962	0.0353982	0.00806452	0.00707547	0.0112045	0.0388979	0.00689655	0.0280749	0.0159363	0.00777202	0.0161663	0.0285714	0.0162963	0.0148305	0.0150376	0.00802752	0.0125786
MBTPS1_2	tttctttttt	4032	0.0267534	0.04039	0.0127246	0.0160305	0.0301353	0.0254777	0.0275482	0.0182421	0.0294511	0.00644567	0.012987	0.0240757	0.0128088	0.0235507	0	0.0149355	0.023753	0.0254237	0.0267035	0.0214918	0.0212766	0.00974421	0.0159119	0.00989209	0.0280702	0.0248307	0.0128425	0.0176289	0.00956938	0.0153631	0.0198544	0.0389381	0.016129	0.0306604	0.0154062	0.0324149	0.0413793	0.0106952	0.0199203	0.0181347	0.0254042	0.0194805	0.0311111	0.029661	0.0165414	0.0149083	0.0196541
MBTPS1_2	ttcttttttt	3923	0.0130152	0.0139276	0.0142216	0.0198473	0.0184502	0	0.0330579	0.0116086	0.0267738	0.0156538	0.018278	0.0206363	0.0137237	0.00724638	0	0.0271555	0.0340459	0.0286017	0.0156538	0.0214918	0.037234	0.0109622	0.0269278	0.0242806	0.0187135	0.023702	0.0128425	0.0141031	0.0143541	0.0181564	0.0271343	0.0141593	0.0107527	0.0117925	0.022409	0.012966	0.0551724	0.0187166	0.0139442	0.0233161	0.0184758	0.0220779	0.0237037	0.0190678	0.0120301	0.0183486	0.0298742
MBTPS1_2	ttttttttct	3564	0.0202458	0.0222841	0.0202096	0.0244275	0.0289053	0.0127389	0.00550964	0.00829187	0.0133869	0.0092081	0.028379	0.0146174	0.010979	0.0380435	0	0.0217244	0.00633413	0.0148305	0.019337	0.011378	0.018617	0.0365408	0.0171359	0.028777	0.0269006	0.0146727	0.0256849	0.0185104	0.0191388	0.0209497	0.0205162	0.0106195	0.0349462	0.00471698	0.0294118	0.0113452	0.0551724	0.0240642	0.0258964	0.00777202	0.0138568	0.012987	0.0222222	0.0201271	0.0075188	0.016055	0.0165094
MBTPS1_2	cttttttttt	3558	0.021692	0.0181058	0.00898204	0.0137405	0.0172202	0.0127389	0.0192837	0.0149254	0.0174029	0.0138122	0.015392	0.0103181	0.010064	0.0181159	0	0.0169722	0.0435471	0.0137712	0.0211786	0.022756	0.018617	0.00974421	0.0183599	0.0134892	0.0152047	0.023702	0.015411	0.0260026	0.0311005	0.0153631	0.0191926	0.0212389	0.0215054	0.0165094	0.00980392	0.0178282	0.0137931	0.0334225	0.0139442	0.0233161	0.0138568	0.0194805	0.0296296	0.0148305	0.0225564	0.0114679	0.0180818
MBTPS1_2	tttttctttt	2171	0.0159074	0.00696379	0.0172156	0.0122137	0.00799508	0	0.00550964	0.00995025	0.00803213	0.0184162	0.00625301	0.0189166	0.0128088	0.00543478	0	0.01222	0.00475059	0.0095339	0.0119705	0.00758534	0.00797872	0.00365408	0.0134639	0.0125899	0.00233918	0.00790068	0.0179795	0.012781	0.0143541	0.00698324	0.00860357	0.00530973	0.00268817	0.00707547	0.0140056	0.00648298	0.0137931	0.00668449	0.00996016	0.00518135	0.00692841	0.0038961	0.0133333	0.0127119	0.00300752	0.00802752	0.0102201
MBTPS1_2	ttttttcttt	1507	0.00506146	0.00696379	0.00523952	0.00381679	0.00615006	0.00636943	0.0110193	0.00829187	0.00267738	0.0156538	0.00769601	0.00429923	0.0164684	0.00905797	0	0.0101833	0.00475059	0.00529661	0.0092081	0.00758534	0.0106383	0.00243605	0.00734394	0.0170863	0.00701754	0.00564334	0.00513699	0.0096959	0.00717703	0.00698324	0.0099272	0.00707965	0.0215054	0.00943396	0.0070028	0.00486224	0.00689655	0.0013369	0.00199203	0.0181347	0.00692841	0.0012987	0.00444444	0.00847458	0.00601504	0.00458716	0.0117925
MBTPS1_2	ttttcttttt	1396	0.00795372	0.0097493	0.00523952	0.00610687	0.00676507	0.00636943	0.00550964	0.0066335	0.00401606	0.00736648	0.00817701	0.00429923	0.0073193	0.00181159	0	0.00746775	0.00554236	0.00317797	0.00736648	0.00632111	0.0159574	0.00243605	0.00856793	0.00539568	0.00818713	0.0124153	0.00941781	0.0101366	0.00717703	0.00558659	0.0152217	0.00176991	0.00806452	0.00471698	0.00840336	0.0162075	0	0.0026738	0.0059761	0.00518135	0	0.00779221	0.00888889	0.00847458	0.00902256	0.00573394	0.00471698
MBTPS1_2	tttttttttc	1218	0.00650759	0.00557103	0.00224551	0.00381679	0.00492005	0	0.00275482	0.00829187	0.00669344	0.00460405	0.00769601	0.00859845	0.00365965	0.00181159	0	0.00610998	0.00791766	0.00423729	0.00460405	0.00252845	0.00265957	0.00730816	0.0110159	0.0116906	0.00584795	0.010158	0.00599315	0.00793301	0	0.0027933	0.00529451	0.00530973	0.00268817	0.0212264	0.012605	0.0145867	0.00689655	0.00534759	0.00996016	0.00777202	0.00461894	0.00779221	0.00888889	0.00211864	0.00300752	0.00458716	0.00393082
MBTPS1_2	tttcttttct	36	0	0	0	0	0	0	0	0	0.00267738	0	0	0	0	0	0	0	0	0	0	0	0	0.00121803	0.00122399	0	0.00116959	0.00112867	0	0	0	0	0	0	0	0	0	0	0	0	0	0	0	0	0	0	0.00150376	0	0
MBTPS1_2	ttcttttttc	24	0.000723066	0	0	0	0	0	0	0	0.00133869	0	0	0	0	0	0	0.000678887	0	0	0	0	0	0	0	0.00179856	0	0	0	0	0	0	0	0	0	0	0	0	0	0	0	0	0	0	0	0	0.00150376	0	0
[truncated: 145 more columns]

## Sheet: Efficiency
Sample	Transferred(C->T)	All Base(C)	Efficiency
P11C11	2449097	2476856	98.88%
P11D05	2112605	2138702	98.78%
P11D07	2335364	2362234	98.86%
P11D08	2622025	2651047	98.91%
P14A02	3134919	3169853	98.90%
P14A08	1326102	1342197	98.80%
P14A10	2335025	2362763	98.83%
P14B08	1515851	1532910	98.89%
P14B09	2348702	2376464	98.83%
P14B11	2291472	2318249	98.84%
P14B12	2713773	2745738	98.84%
P14D07	2866784	2901260	98.81%
P14F04	2956867	2992679	98.80%
P14F11	2193827	2221543	98.75%
P14G06	3000540	3038175	98.76%
P14G10	2441181	2468453	98.90%
P14G12	2477212	2505201	98.88%
P14H02	2049149	2073343	98.83%
P14H05	2556230	2585052	98.89%
P14H08	2645084	2676012	98.84%
P14H09	1420948	1437706	98.83%
P15C09	3097290	3136990	98.73%
P15E02	1799798	1821297	98.82%
P15E03	3074081	3110193	98.84%
P15E10	2724609	2755617	98.87%
P15F02	2443395	2472749	98.81%
P15F07	2628880	2659408	98.85%
P15G02	3818748	3863281	98.85%
P15G12	2324390	2351507	98.85%
P17E08	3075500	3110643	98.87%
P1A09	2934933	2971300	98.78%
P1A11	1994874	2019172	98.80%
P1B06	1982059	2006917	98.76%
P1C01	2388049	2417046	98.80%
P1C12	2678850	2711706	98.79%
P1D10	2786294	2819642	98.82%
P1E02	2157926	2185348	98.75%
P1E03	3263800	3301774	98.85%
P1H09	2687458	2719949	98.81%
P20B05	2489116	2519219	98.81%
P20D12	2309613	2337620	98.80%
P20E07	2756357	2787880	98.87%
P20F04	2690579	2722252	98.84%
P20F05	2962479	2995635	98.89%
P20F10	2903248	2936777	98.86%
P20F11	2923021	2956239	98.88%
P20G11	2714233	2746062	98.84%
P21A01	2989856	3022027	98.94%
P21A02	3062615	3099133	98.82%
P21A05	3243986	3279397	98.92%
P21B11	3663221	3703480	98.91%
P21C05	3078213	3113013	98.88%
P21C09	3345864	3384149	98.87%
P21D05	3425596	3464712	98.87%
P21D11	3583048	3622874	98.90%
P21E11	2774158	2805301	98.89%
P21F02	3004632	3039789	98.84%
P21F03	3338541	3376949	98.86%
P21G07	3171116	3207004	98.88%
P21H03	2294134	2320518	98.86%
P21H10	3503996	3542085	98.92%
P22A01	3110471	3149556	98.76%
P22A04	2463998	2496264	98.71%
P22A10	2633410	2663671	98.86%
P22B08	2183034	2211328	98.72%
P22B09	2118683	2149719	98.56%
P22C01	2219875	2248325	98.73%
P22C03	2393339	2424191	98.73%
P22D02	2119554	2146853	98.73%
P22E01	3232351	3270721	98.83%
P22E07	1950368	1973932	98.81%
P22E08	1727850	1749366	98.77%
P22F10	1885582	1908653	98.79%
P22G01	2868583	2901955	98.85%
P22G11	2531942	2561366	98.85%
P22H07	2410396	2439014	98.83%
P23A02	2332543	2359275	98.87%
P23A06	3101848	3134837	98.95%
P23B10	2285311	2310448	98.91%
P23B11	2272334	2298024	98.88%
P23C12	3142715	3177450	98.91%
P23D06	2150222	2174803	98.87%
P23E04	2404510	2431292	98.90%
P23F01	2422150	2450296	98.85%
P23F02	2671130	2700597	98.91%
P23F03	2910699	2944782	98.84%
P23F08	2863495	2896310	98.87%
P23G06	2520634	2550680	98.82%
P23G08	3074462	3109899	98.86%
P23H03	3219465	3253679	98.95%
P24A02	2344154	2372246	98.82%
P24A11	2919988	2952352	98.90%
P24B03	2860160	2892403	98.89%
P24B07	2799882	2831044	98.90%
P24C02	2651067	2682399	98.83%
P24C05	2146053	2170316	98.88%
P24C08	3224211	3261133	98.87%
P24D02	3056701	3090794	98.90%
P24D03	3017425	3053208	98.83%
P24D04	2736709	2769020	98.83%
P24E04	2415884	2444526	98.83%
P24E05	2433622	2460491	98.91%
P24E07	1761792	1784214	98.74%
P24F04	2466562	2495926	98.82%
P24F11	2641492	2671876	98.86%
P24G05	2297868	2324601	98.85%
P24G08	3145976	3181661	98.88%
P24G09	2284082	2309886	98.88%
P24H07	3250204	3288077	98.85%
P24H08	3525757	3566178	98.87%
P24H10	2550845	2581604	98.81%
P25A12	2161984	2186575	98.88%
P25C07	2937532	2970579	98.89%
P25D09	2058560	2082793	98.84%
P25E03	2489749	2517496	98.90%
P25G10	3437552	3476717	98.87%
P26A03	3193410	3229792	98.87%
P26A04	2743268	2774178	98.89%
P26B01	2400148	2428283	98.84%
P26B04	2401513	2430844	98.79%
P26B05	1488849	1506496	98.83%
P26B09	3117696	3154897	98.82%
P26C10	2795596	2827966	98.86%
P26D01	2561349	2591391	98.84%
P26D03	1899217	1923073	98.76%
P26D04	2492259	2521534	98.84%
P26D05	3011632	3046089	98.87%
P26D08	3043071	3077274	98.89%
P26E01	2552729	2582251	98.86%
P26E06	3042367	3075777	98.91%
P26E07	2346901	2373546	98.88%
P26E11	2532455	2560672	98.90%
P26F09	2839580	2871942	98.87%
P27A04	684333	693139	98.73%
P27A05	578566	586061	98.72%
P27B10	557814	565224	98.69%
P27C10	553068	561161	98.56%
P27D01	546082	554543	98.47%
P27D03	645894	655295	98.57%
P27D08	530602	537485	98.72%
P2A08	2896751	2930336	98.85%
P2C11	2776008	2807538	98.88%
P2D11	1692042	1711243	98.88%
P2F09	2548836	2577752	98.88%
P3C08	2645346	2675187	98.88%
P3D01	3048270	3082878	98.88%
P3D09	3123521	3158684	98.89%
P3G04	2955256	2990679	98.82%
P3G05	3490653	3529817	98.89%
P3H11	3480021	3519141	98.89%
P3H12	3365567	3404538	98.86%
P4A06	3010417	3045820	98.84%
P4B02	2225106	2254013	98.72%
P4B08	2283171	2311818	98.76%
P4C08	2621185	2650786	98.88%
P4D09	3283378	3320264	98.89%
P4E09	2256555	2280242	98.96%
P4E10	2246730	2273702	98.81%
P4E12	2602270	2633662	98.81%
P4F03	2967121	3004196	98.77%
P4F08	3000634	3035558	98.85%
P4H12	3242479	3280849	98.83%
P5B11	3467729	3508045	98.85%
P5C12	2423010	2453857	98.74%
P5D05	3034637	3070383	98.84%
P5E02	2258869	2284586	98.87%
P5E10	2158080	2183279	98.85%
P5F05	2297396	2322764	98.91%
P5G02	2574707	2603699	98.89%
P5G05	2833882	2866234	98.87%
P5G06	2576364	2607397	98.81%
P5G10	2311404	2339033	98.82%
P5H04	3138837	3175139	98.86%
P5H07	3197122	3232862	98.89%
P6A08	3187570	3224815	98.85%
P6A11	2842136	2873534	98.91%
P6A12	3066836	3101070	98.90%
P6B01	2702788	2734981	98.82%
P6B05	2356331	2384342	98.83%
P6B10	3124465	3159425	98.89%
P6C09	2597324	2628165	98.83%
P6C11	2527273	2556074	98.87%
P6D05	2936304	2968635	98.91%
P6D12	3353475	3389576	98.93%
P6E02	3207595	3243991	98.88%
P6E03	3120965	3157455	98.84%
P6E07	3329550	3365641	98.93%
P6F08	3092898	3128340	98.87%
P6G04	2889212	2921957	98.88%
P6H02	2758875	2792229	98.81%
P6H10	2677410	2706385	98.93%
P6H12	2608514	2638002	98.88%

## Sheet: Methy. Info
Sample	Target	Position	Chr	GenomePosition	Distance2TSS	Type	Mathy. Base(C)	All Base	Percentage
P11C11	AMFR_1_	37	16	56459026	424	CG	3	916	0.00327511
P11C11	AMFR_1_	39	16	56459028	422	CG	7	928	0.0075431
P11C11	AMFR_1_	45	16	56459034	416	CG	11	932	0.0118026
P11C11	AMFR_1_	55	16	56459044	406	CG	9	930	0.00967742
P11C11	AMFR_1_	58	16	56459047	403	CG	9	934	0.00963597
P11C11	AMFR_1_	62	16	56459051	399	CG	10	934	0.0107066
P11C11	AMFR_1_	66	16	56459055	395	CG	14	930	0.0150538
P11C11	AMFR_1_	70	16	56459059	391	CG	6	930	0.00645161
P11C11	AMFR_1_	74	16	56459063	387	CG	9	928	0.00969828
P11C11	AMFR_1_	77	16	56459066	384	CG	8	926	0.00863931
P11C11	AMFR_1_	80	16	56459069	381	CG	19	1111	0.0171017
P11C11	AMFR_1_	95	16	56459084	366	CG	29	1191	0.0243493
P11C11	AMFR_1_	101	16	56459090	360	CG	18	1190	0.0151261
P11C11	AMFR_1_	113	16	56459102	348	CG	17	1188	0.0143098
P11C11	AMFR_1_	118	16	56459107	343	CG	8	1191	0.00671704
P11C11	AMFR_1_	121	16	56459110	340	CG	16	1190	0.0134454
P11C11	AMFR_1_	127	16	56459116	334	CG	22	1190	0.0184874
P11C11	AMFR_1_	133	16	56459122	328	CG	7	1189	0.0058873
P11C11	AMFR_1_	146	16	56459135	315	CG	6	1185	0.00506329
P11C11	AMFR_1_	148	16	56459137	313	CG	8	1182	0.00676819
P11C11	AMFR_1_	150	16	56459139	311	CG	6	1167	0.00514139
P11C11	AMFR_1_	157	16	56459146	304	CG	6	912	0.00657895
P11C11	AMFR_1_	187	16	56459176	274	CG	11	911	0.0120746
P11C11	AMFR_1_	197	16	56459186	264	CG	9	910	0.00989011
P11C11	AMFR_1_	207	16	56459196	254	CG	21	945	0.0222222
P11C11	AMFR_2	27	16	56459217	233	CG	0	60	0
P11C11	AMFR_2	31	16	56459221	229	CG	1	60	0.0166667
P11C11	AMFR_2	44	16	56459234	216	CG	0	48	0
P11C11	AMFR_2	52	16	56459242	208	CG	0	48	0
P11C11	AMFR_2	58	16	56459248	202	CG	1	49	0.0204082
P11C11	AMFR_2	61	16	56459251	199	CG	0	50	0
P11C11	AMFR_2	87	16	56459277	173	CG	1	69	0.0144928
P11C11	AMFR_2	92	16	56459282	168	CG	0	75	0
P11C11	AMFR_2	96	16	56459286	164	CG	1	71	0.0140845
P11C11	AMFR_2	106	16	56459296	154	CG	1	68	0.0147059
P11C11	AMFR_2	109	16	56459299	151	CG	1	69	0.0144928
P11C11	AMFR_2	115	16	56459305	145	CG	1	71	0.0140845
P11C11	AMFR_2	117	16	56459307	143	CG	0	67	0
P11C11	AMFR_2	121	16	56459311	139	CG	1	70	0.0142857
P11C11	AMFR_2	124	16	56459314	136	CG	0	72	0
P11C11	AMFR_2	130	16	56459320	130	CG	3	74	0.0405405
P11C11	AMFR_2	140	16	56459330	120	CG	0	82	0
P11C11	AMFR_2	143	16	56459333	117	CG	1	84	0.0119048
P11C11	AMFR_2	149	16	56459339	111	CG	1	87	0.0114943
P11C11	AMFR_2	155	16	56459345	105	CG	4	83	0.0481928
P11C11	AMFR_2	161	16	56459351	99	CG	2	75	0.0266667
P11C11	AMFR_2	164	16	56459354	96	CG	0	77	0
P11C11	AMFR_2	167	16	56459357	93	CG	0	71	0
P11C11	AMFR_2	170	16	56459360	90	CG	1	70	0.0142857
P11C11	AMFR_2	173	16	56459363	87	CG	1	68	0.0147059
P11C11	AMFR_2	175	16	56459365	85	CG	1	68	0.0147059
P11C11	AMFR_2	178	16	56459368	82	CG	0	64	0
P11C11	AMFR_2	183	16	56459373	77	CG	0	54	0
P11C11	AMFR_2	188	16	56459378	72	CG	1	55	0.0181818
P11C11	AMFR_2	193	16	56459383	67	CG	2	54	0.037037
P11C11	AMFR_2	209	16	56459399	51	CG	1	52	0.0192308
P11C11	AMFR_2	212	16	56459402	48	CG	0	51	0
P11C11	AMFR_2	217	16	56459407	43	CG	0	36	0
P11C11	AMFR_2	222	16	56459412	38	CG	0	36	0
P11C11	AMFR_2	224	16	56459414	36	CG	0	34	0
P11C11	AMFR_3	94	16	56458225	1225	CG	9	388	0.0231959
P11C11	AMFR_3	197	16	56458122	1328	CG	25	298	0.0838926
P11C11	APLP2_1	19	11	129939046	-669	CG	28	3261	0.00858632
P11C11	APLP2_1	22	11	129939049	-666	CG	22	3270	0.00672783
P11C11	APLP2_1	81	11	129939108	-607	CG	90	4023	0.0223714
P11C11	APLP2_1	100	11	129939127	-588	CG	56	4023	0.01392
P11C11	APLP2_1	115	11	129939142	-573	CG	71	4024	0.0176441
P11C11	APLP2_1	120	11	129939147	-568	CG	53	4025	0.0131677
P11C11	APLP2_1	122	11	129939149	-566	CG	39	4026	0.00968703
P11C11	APLP2_1	126	11	129939153	-562	CG	30	4025	0.00745342
P11C11	APLP2_1	138	11	129939165	-550	CG	39	4026	0.00968703
P11C11	APLP2_1	146	11	129939173	-542	CG	18	4017	0.00448096
P11C11	APLP2_1	149	11	129939176	-539	CG	28	3992	0.00701403
P11C11	APLP2_1	163	11	129939190	-525	CG	27	2644	0.0102118
P11C11	APLP2_1	173	11	129939200	-515	CG	15	2629	0.00570559
P11C11	APLP2_1	182	11	129939209	-506	CG	11	2629	0.0041841
P11C11	APLP2_1	184	11	129939211	-504	CG	21	2637	0.00796359
P11C11	APLP2_2	29	11	129939625	-90	CG	0	233	0
P11C11	APLP2_2	33	11	129939621	-94	CG	1	233	0.00429185
P11C11	APLP2_2	42	11	129939612	-103	CG	1	233	0.00429185
P11C11	APLP2_2	44	11	129939610	-105	CG	1	233	0.00429185
P11C11	APLP2_2	46	11	129939608	-107	CG	0	233	0
P11C11	APLP2_2	53	11	129939601	-114	CG	6	235	0.0255319
P11C11	APLP2_2	57	11	129939597	-118	CG	1	235	0.00425532
P11C11	APLP2_2	63	11	129939591	-124	CG	1	235	0.00425532
P11C11	APLP2_2	69	11	129939585	-130	CG	0	242	0
P11C11	APLP2_2	73	11	129939581	-134	CG	3	288	0.0104167
P11C11	APLP2_2	75	11	129939579	-136	CG	6	292	0.0205479
P11C11	APLP2_2	85	11	129939569	-146	CG	6	307	0.019544
P11C11	APLP2_2	91	11	129939563	-152	CG	5	303	0.0165017
P11C11	APLP2_2	96	11	129939558	-157	CG	4	303	0.0132013
P11C11	APLP2_2	109	11	129939545	-170	CG	11	303	0.0363036
P11C11	APLP2_2	116	11	129939538	-177	CG	11	306	0.0359477
P11C11	APLP2_2	118	11	129939536	-179	CG	8	306	0.0261438
P11C11	APLP2_2	124	11	129939530	-185	CG	5	289	0.017301
P11C11	APLP2_2	128	11	129939526	-189	CG	4	307	0.0130293
P11C11	APLP2_2	130	11	129939524	-191	CG	9	308	0.0292208
P11C11	APLP2_2	132	11	129939522	-193	CG	2	308	0.00649351
P11C11	APLP2_2	135	11	129939519	-196	CG	8	310	0.0258065
P11C11	APLP2_2	147	11	129939507	-208	CG	4	324	0.0123457
P11C11	APLP2_2	161	11	129939493	-222	CG	3	252	0.0119048
P11C11	APLP2_2	163	11	129939491	-224	CG	1	252	0.00396825
P11C11	APLP2_2	182	11	129939472	-243	CG	0	251	0
P11C11	APLP2_2	189	11	129939465	-250	CG	0	244	0
P11C11	APLP2_2	192	11	129939462	-253	CG	0	248	0
P11C11	APLP2_3	25	11	129940479	764	CG	0	459	0
P11C11	APLP2_3	27	11	129940481	766	CG	1	459	0.00217865
P11C11	APLP2_3	33	11	129940487	772	CG	0	461	0
P11C11	APLP2_3	40	11	129940494	779	CG	4	461	0.00867679
P11C11	APLP2_3	42	11	129940496	781	CG	2	464	0.00431034
P11C11	APLP2_3	44	11	129940498	783	CG	3	462	0.00649351
P11C11	APLP2_3	46	11	129940500	785	CG	3	466	0.00643777
P11C11	APLP2_3	60	11	129940514	799	CG	1	466	0.00214592
P11C11	APLP2_3	67	11	129940521	806	CG	3	470	0.00638298
P11C11	APLP2_3	79	11	129940533	818	CG	12	474	0.0253165
P11C11	APLP2_3	81	11	129940535	820	CG	4	508	0.00787402
P11C11	APLP2_3	89	11	129940543	828	CG	10	529	0.0189036
P11C11	APLP2_3	93	11	129940547	832	CG	4	536	0.00746269
P11C11	APLP2_3	108	11	129940562	847	CG	4	539	0.00742115
P11C11	APLP2_3	118	11	129940572	857	CG	9	536	0.016791
P11C11	APLP2_3	123	11	129940577	862	CG	4	527	0.00759013
P11C11	APLP2_3	125	11	129940579	864	CG	2	526	0.00380228
P11C11	APLP2_3	129	11	129940583	868	CG	3	526	0.00570342
P11C11	APLP2_3	131	11	129940585	870	CG	6	526	0.0114068
P11C11	APLP2_3	147	11	129940601	886	CG	2	527	0.00379507
P11C11	APLP2_3	160	11	129940614	899	CG	2	466	0.00429185
P11C11	APLP2_3	164	11	129940618	903	CG	6	464	0.012931
P11C11	APLP2_3	171	11	129940625	910	CG	2	464	0.00431034
P11C11	APLP2_3	181	11	129940635	920	CG	4	460	0.00869565
P11C11	APLP2_3	192	11	129940646	931	CG	2	465	0.00430108
P11C11	APLP2_3	199	11	129940653	938	CG	5	470	0.0106383
P11C11	APLP2_3	205	11	129940659	944	CG	11	488	0.022541
P11C11	DAB2_	20	5	39425278	57	CG	39	1790	0.0217877
P11C11	DAB2_	45	5	39425303	32	CG	21	1791	0.0117253
P11C11	DAB2_	48	5	39425306	29	CG	26	1791	0.014517
P11C11	DAB2_	50	5	39425308	27	CG	51	1791	0.0284757
P11C11	DAB2_	54	5	39425312	23	CG	11	1790	0.00614525
P11C11	DAB2_	61	5	39425319	16	CG	20	1791	0.0111669
P11C11	DAB2_	116	5	39425374	-39	CG	36	1975	0.0182278
P11C11	DAB2_	123	5	39425381	-46	CG	23	2021	0.0113805
P11C11	DAB2_	136	5	39425394	-59	CG	22	2028	0.0108481
P11C11	DAB2_	156	5	39425414	-79	CG	23	1790	0.0128492
P11C11	DAB2_	172	5	39425430	-95	CG	40	1791	0.0223339
P11C11	DAB2_	192	5	39425450	-115	CG	19	1791	0.0106086
P11C11	DCAF8_	23	1	160232354	-4	CG	32	1931	0.0165717
P11C11	DCAF8_	25	1	160232356	-6	CG	22	1939	0.0113461
P11C11	DCAF8_	27	1	160232358	-8	CG	12	1939	0.00618876
P11C11	DCAF8_	35	1	160232366	-16	CG	9	1939	0.00464157
P11C11	DCAF8_	40	1	160232371	-21	CG	10	1939	0.0051573
P11C11	DCAF8_	52	1	160232383	-33	CG	8	1818	0.00440044
P11C11	DCAF8_	59	1	160232390	-40	CG	16	1939	0.00825168
P11C11	DCAF8_	70	1	160232401	-51	CG	22	2189	0.0100503
P11C11	DCAF8_	86	1	160232417	-67	CG	15	2211	0.00678426
P11C11	DCAF8_	98	1	160232429	-79	CG	12	2210	0.00542986
P11C11	DCAF8_	105	1	160232436	-86	CG	13	2209	0.00588502
P11C11	DCAF8_	111	1	160232442	-92	CG	19	2210	0.00859729
P11C11	DCAF8_	119	1	160232450	-100	CG	35	2210	0.0158371
P11C11	DCAF8_	150	1	160232481	-131	CG	10	2194	0.00455789
P11C11	DCAF8_	185	1	160232516	-166	CG	10	1938	0.00515996
P11C11	DENND4C_1	38	9	19229813	-674	CG	126	425	0.296471
P11C11	DENND4C_1	65	9	19229840	-647	CG	67	425	0.157647
P11C11	DENND4C_1	104	9	19229879	-608	CG	88	521	0.168906
P11C11	DENND4C_1	118	9	19229893	-594	CG	66	521	0.126679
P11C11	DENND4C_1	122	9	19229897	-590	CG	116	521	0.222649
P11C11	DENND4C_1	124	9	19229899	-588	CG	92	521	0.176583
P11C11	DENND4C_1	164	9	19229939	-548	CG	152	425	0.357647
P11C11	DENND4C_1	177	9	19229952	-535	CG	92	398	0.231156
P11C11	DENND4C_1	179	9	19229954	-533	CG	85	397	0.214106
P11C11	DENND4C_1	181	9	19229956	-531	CG	105	397	0.264484
P11C11	DENND4C_2	39	9	19231095	608	CG	0	40	0
P11C11	DENND4C_2	41	9	19231097	610	CG	0	38	0
P11C11	DENND4C_2	44	9	19231100	613	CG	0	31	0
P11C11	DENND4C_2	48	9	19231104	617	CG	0	31	0
P11C11	DENND4C_2	51	9	19231107	620	CG	0	30	0
P11C11	DENND4C_2	66	9	19231122	635	CG	0	30	0
P11C11	DENND4C_2	72	9	19231128	641	CG	0	30	0
P11C11	DENND4C_2	80	9	19231136	649	CG	2	30	0.0666667
P11C11	DENND4C_2	82	9	19231138	651	CG	0	30	0
P11C11	DENND4C_2	97	9	19231153	666	CG	0	30	0
P11C11	DENND4C_2	105	9	19231161	674	CG	0	2	0
P11C11	DENND4C_2	108	9	19231164	677	CG	0	2	0
P11C11	DENND4C_2	113	9	19231169	682	CG	1	2	0.5
P11C11	DENND4C_2	116	9	19231172	685	CG	0	2	0
P11C11	DENND4C_2	120	9	19231176	689	CG	0	2	0
P11C11	DENND4C_2	135	9	19231191	704	CG	0	3	0
P11C11	DENND4C_2	142	9	19231198	711	CG	0	3	0
P11C11	DENND4C_2	157	9	19231213	726	CG	0	2	0
P11C11	DENND4C_2	177	9	19231233	746	CG	0	68	0
P11C11	DENND4C_2	191	9	19231247	760	CG	2	61	0.0327869
P11C11	FBXW7_1	26	4	153456861	386	CG	1	149	0.00671141
P11C11	FBXW7_1	31	4	153456856	391	CG	8	148	0.0540541
P11C11	FBXW7_1	38	4	153456849	398	CG	4	151	0.0264901
P11C11	FBXW7_1	45	4	153456842	405	CG	2	142	0.0140845
P11C11	FBXW7_1	80	4	153456807	440	CG	15	259	0.0579151
P11C11	FBXW7_1	85	4	153456802	445	CG	13	259	0.0501931
P11C11	FBXW7_1	94	4	153456793	454	CG	10	261	0.0383142
P11C11	FBXW7_1	101	4	153456786	461	CG	31	260	0.119231
P11C11	FBXW7_1	107	4	153456780	467	CG	15	262	0.0572519
P11C11	FBXW7_1	113	4	153456774	473	CG	17	272	0.0625
P11C11	FBXW7_1	116	4	153456771	476	CG	7	273	0.025641
P11C11	FBXW7_1	119	4	153456768	479	CG	3	272	0.0110294
P11C11	FBXW7_1	123	4	153456764	483	CG	3	274	0.0109489
P11C11	FBXW7_1	129	4	153456758	489	CG	3	274	0.0109489
P11C11	FBXW7_1	133	4	153456754	493	CG	0	271	0
P11C11	FBXW7_1	142	4	153456745	502	CG	2	279	0.00716846
P11C11	FBXW7_1	150	4	153456737	510	CG	1	277	0.00361011
P11C11	FBXW7_1	153	4	153456734	513	CG	1	164	0.00609756
P11C11	FBXW7_1	158	4	153456729	518	CG	2	161	0.0124224
P11C11	FBXW7_1	166	4	153456721	526	CG	1	157	0.00636943
P11C11	FBXW7_1	170	4	153456717	530	CG	1	147	0.00680272
P11C11	FBXW7_1	176	4	153456711	536	CG	0	155	0
P11C11	FBXW7_2	27	4	153457427	-180	CG	7	1111	0.00630063
P11C11	FBXW7_2	30	4	153457430	-183	CG	5	1111	0.00450045
P11C11	FBXW7_2	34	4	153457434	-187	CG	14	1111	0.0126013
P11C11	FBXW7_2	44	4	153457444	-197	CG	6	1110	0.00540541
P11C11	FBXW7_2	49	4	153457449	-202	CG	5	1110	0.0045045
P11C11	FBXW7_2	54	4	153457454	-207	CG	7	1110	0.00630631
P11C11	FBXW7_2	56	4	153457456	-209	CG	8	1111	0.00720072
P11C11	FBXW7_2	63	4	153457463	-216	CG	8	1110	0.00720721
P11C11	FBXW7_2	69	4	153457469	-222	CG	9	1110	0.00810811
P11C11	FBXW7_2	75	4	153457475	-228	CG	16	1103	0.0145059
P11C11	FBXW7_2	78	4	153457478	-231	CG	10	1110	0.00900901
P11C11	FBXW7_2	84	4	153457484	-237	CG	13	1110	0.0117117
P11C11	FBXW7_2	92	4	153457492	-245	CG	9	1109	0.00811542
P11C11	FBXW7_2	96	4	153457496	-249	CG	20	1109	0.0180343
P11C11	FBXW7_2	98	4	153457498	-251	CG	5	1132	0.00441696
P11C11	FBXW7_2	129	4	153457529	-282	CG	47	1683	0.0279263
P11C11	FBXW7_2	134	4	153457534	-287	CG	26	1684	0.0154394
P11C11	FBXW7_2	148	4	153457548	-301	CG	14	1676	0.00835322
P11C11	FBXW7_2	152	4	153457552	-305	CG	21	1143	0.0183727
P11C11	FBXW7_2	169	4	153457569	-322	CG	7	1108	0.00631769
P11C11	FBXW7_2	175	4	153457575	-328	CG	22	1109	0.0198377
P11C11	FBXW7_2	199	4	153457599	-352	CG	4	1106	0.00361664
P11C11	FBXW7_2	209	4	153457609	-362	CG	9	1097	0.00820419
P11C11	FBXW7_3	22	4	153456043	1204	CG	7	838	0.00835322
P11C11	FBXW7_3	25	4	153456040	1207	CG	8	838	0.00954654
P11C11	FBXW7_3	101	4	153455964	1283	CG	5	1014	0.00493097
P11C11	FBXW7_3	157	4	153455908	1339	CG	7	838	0.00835322
P11C11	FBXW7_3	185	4	153455880	1367	CG	6	836	0.00717703
P11C11	FBXW7_3	215	4	153455850	1397	CG	8	838	0.00954654
P11C11	FLOT1_1	35	6	30710226	402	CG	70	2835	0.0246914
P11C11	FLOT1_1	37	6	30710224	404	CG	32	2835	0.0112875
P11C11	FLOT1_1	60	6	30710201	427	CG	26	2834	0.00917431
P11C11	FLOT1_1	63	6	30710198	430	CG	25	2831	0.0088308
P11C11	FLOT1_1	85	6	30710176	452	CG	91	4124	0.022066
P11C11	FLOT1_1	91	6	30710170	458	CG	185	4141	0.0446752
P11C11	FLOT1_1	142	6	30710119	509	CG	57	4141	0.0137648
P11C11	FLOT1_1	165	6	30710096	532	CG	44	2834	0.0155258
P11C11	FLOT1_1	170	6	30710091	537	CG	58	2994	0.0193721
P11C11	FLOT1_1	175	6	30710086	542	CG	49	2994	0.0163661
P11C11	FLOT1_1	199	6	30710062	566	CG	12	2993	0.00400936
P11C11	FLOT1_2	25	6	30710615	13	CG	2	962	0.002079
P11C11	FLOT1_2	46	6	30710636	-8	CG	6	967	0.00620476
P11C11	FLOT1_2	58	6	30710648	-20	CG	14	967	0.0144778
P11C11	FLOT1_2	72	6	30710662	-34	CG	10	953	0.0104932
P11C11	FLOT1_2	81	6	30710671	-43	CG	4	953	0.00419727
P11C11	FLOT1_2	87	6	30710677	-49	CG	11	953	0.0115425
P11C11	FLOT1_2	90	6	30710680	-52	CG	8	953	0.00839454
P11C11	FLOT1_2	92	6	30710682	-54	CG	8	952	0.00840336
P11C11	FLOT1_2	97	6	30710687	-59	CG	5	952	0.0052521
P11C11	FLOT1_2	102	6	30710692	-64	CG	7	955	0.00732984
P11C11	FLOT1_2	108	6	30710698	-70	CG	2	955	0.00209424
P11C11	FLOT1_2	128	6	30710718	-90	CG	9	989	0.0091001
P11C11	FLOT1_2	143	6	30710733	-105	CG	5	986	0.00507099
P11C11	FLOT1_2	165	6	30710755	-127	CG	5	954	0.00524109
P11C11	FLOT1_2	171	6	30710761	-133	CG	13	954	0.0136268
P11C11	FLOT1_2	174	6	30710764	-136	CG	4	954	0.00419287
P11C11	FLOT1_2	176	6	30710766	-138	CG	3	954	0.00314465
P11C11	FLOT1_2	198	6	30710788	-160	CG	15	950	0.0157895
P11C11	FLOT1_2	226	6	30710816	-188	CG	7	950	0.00736842
P11C11	FLOT1_2	233	6	30710823	-195	CG	6	950	0.00631579
P11C11	FLOT1_3	35	6	30711760	-1132	CG	43	691	0.0622287
P11C11	FLOT1_3	42	6	30711767	-1139	CG	9	921	0.00977199
P11C11	FLOT1_3	51	6	30711776	-1148	CG	15	1114	0.013465
P11C11	FLOT1_3	71	6	30711796	-1168	CG	12	1135	0.0105727
P11C11	FLOT1_3	77	6	30711802	-1174	CG	27	1135	0.0237885
P11C11	FLOT1_3	80	6	30711805	-1177	CG/rs3094124	12	1132	0.0106007
P11C11	FLOT1_3	96	6	30711821	-1193	CG	34	1135	0.0299559
P11C11	FLOT1_3	107	6	30711832	-1204	CG	4	1136	0.00352113
P11C11	FLOT1_3	110	6	30711835	-1207	CG	8	1136	0.00704225
P11C11	FLOT1_3	119	6	30711844	-1216	CG	6	1136	0.00528169
P11C11	FLOT1_3	138	6	30711863	-1235	CG	23	1136	0.0202465
P11C11	FLOT1_3	141	6	30711866	-1238	CG	4	1136	0.00352113
P11C11	FLOT1_4	30	6	30712007	-1379	CG	2	320	0.00625
P11C11	FLOT1_4	45	6	30712022	-1394	CG	1	319	0.0031348
P11C11	FLOT1_4	50	6	30712027	-1399	CG	2	320	0.00625
P11C11	FLOT1_4	74	6	30712051	-1423	CG	2	322	0.00621118
P11C11	FLOT1_4	81	6	30712058	-1430	CG	4	323	0.0123839
P11C11	FLOT1_4	83	6	30712060	-1432	CG	1	323	0.00309598
P11C11	FLOT1_4	96	6	30712073	-1445	CG	4	322	0.0124224
P11C11	FLOT1_4	99	6	30712076	-1448	CG	6	323	0.0185759
P11C11	FLOT1_4	113	6	30712090	-1462	CG	12	525	0.0228571
P11C11	FLOT1_4	131	6	30712108	-1480	CG	33	585	0.0564103
P11C11	FLOT1_4	137	6	30712114	-1486	CG	53	585	0.0905983
P11C11	FLOT1_4	143	6	30712120	-1492	CG	18	582	0.0309278
P11C11	FLOT1_4	150	6	30712127	-1499	CG	19	569	0.0333919
P11C11	FLOT1_4	152	6	30712129	-1501	CG	31	326	0.095092
P11C11	FLOT1_4	159	6	30712136	-1508	CG	42	313	0.134185
P11C11	FLOT1_4	167	6	30712144	-1516	CG	33	308	0.107143
P11C11	FLOT1_4	171	6	30712148	-1520	CG	7	309	0.0226537
P11C11	FLOT1_4	181	6	30712158	-1530	CG	15	310	0.0483871
P11C11	FLOT1_4	186	6	30712163	-1535	CG	5	310	0.016129
P11C11	FLOT1_4	193	6	30712170	-1542	CG	2	309	0.00647249
P11C11	FLOT1_4	204	6	30712181	-1553	CG	3	308	0.00974026
P11C11	FLOT1_4	225	6	30712202	-1574	CG	4	308	0.012987
P11C11	FLOT1_4	233	6	30712210	-1582	CG	2	307	0.00651466
P11C11	FLOT1_4	236	6	30712213	-1585	CG	4	307	0.0130293
P11C11	FLOT2_	22	17	27224667	48	CG	3	464	0.00646552
P11C11	FLOT2_	24	17	27224665	50	CG	5	469	0.010661
P11C11	FLOT2_	28	17	27224661	54	CG	3	470	0.00638298
P11C11	FLOT2_	31	17	27224658	57	CG	5	476	0.0105042
P11C11	FLOT2_	42	17	27224647	68	CG	22	737	0.0298507
P11C11	FLOT2_	55	17	27224634	81	CG	16	774	0.0206718
P11C11	FLOT2_	65	17	27224624	91	CG	38	763	0.0498034
P11C11	FLOT2_	71	17	27224618	97	CG	16	758	0.0211082
P11C11	FLOT2_	82	17	27224607	108	CG	10	751	0.0133156
P11C11	FLOT2_	87	17	27224602	113	CG	17	767	0.0221643
P11C11	FLOT2_	90	17	27224599	116	CG	21	767	0.0273794
P11C11	FLOT2_	93	17	27224596	119	CG	27	756	0.0357143
P11C11	FLOT2_	113	17	27224576	139	CG	8	749	0.0106809
P11C11	FLOT2_	126	17	27224563	152	CG	6	749	0.00801068
P11C11	FLOT2_	131	17	27224558	157	CG	10	749	0.0133511
P11C11	FLOT2_	155	17	27224534	181	CG	5	426	0.0117371
P11C11	FLOT2_	158	17	27224531	184	CG	9	426	0.0211268
P11C11	GRINA_1	23	8	145064621	396	CG	0	249	0
P11C11	GRINA_1	29	8	145064627	402	CG	0	252	0
P11C11	GRINA_1	34	8	145064632	407	CG	4	252	0.015873
P11C11	GRINA_1	36	8	145064634	409	CG	0	252	0
P11C11	GRINA_1	49	8	145064647	422	CG	3	252	0.0119048
P11C11	GRINA_1	55	8	145064653	428	CG	1	250	0.004
P11C11	GRINA_1	69	8	145064667	442	CG	0	246	0
P11C11	GRINA_1	73	8	145064671	446	CG	3	249	0.0120482
P11C11	GRINA_1	86	8	145064684	459	CG	0	249	0
P11C11	GRINA_1	91	8	145064689	464	CG	2	250	0.008
P11C11	GRINA_1	98	8	145064696	471	CG	3	249	0.0120482
P11C11	GRINA_1	102	8	145064700	475	CG	1	250	0.004
P11C11	GRINA_1	114	8	145064712	487	CG	2	253	0.00790514
P11C11	GRINA_1	118	8	145064716	491	CG	3	256	0.0117188
P11C11	GRINA_1	123	8	145064721	496	CG	3	256	0.0117188
P11C11	GRINA_1	129	8	145064727	502	CG	7	256	0.0273438
P11C11	GRINA_1	152	8	145064750	525	CG	5	255	0.0196078
P11C11	GRINA_1	159	8	145064757	532	CG	10	258	0.0387597
P11C11	GRINA_1	168	8	145064766	541	CG	1	255	0.00392157
P11C11	GRINA_1	171	8	145064769	544	CG	4	255	0.0156863
P11C11	GRINA_1	191	8	145064789	564	CG	3	253	0.0118577
P11C11	GRINA_1	198	8	145064796	571	CG	2	253	0.00790514
P11C11	GRINA_1	209	8	145064807	582	CG	7	250	0.028
P11C11	GRINA_1	223	8	145064821	596	CG	7	249	0.0281124
P11C11	GRINA_2	31	8	145065326	1101	CG	2	17	0.117647
P11C11	GRINA_2	37	8	145065320	1095	CG	3	18	0.166667
P11C11	GRINA_2	40	8	145065317	1092	CG	1	18	0.0555556
P11C11	GRINA_2	55	8	145065302	1077	CG	5	19	0.263158
P11C11	GRINA_2	102	8	145065255	1030	CG	1	16	0.0625
P11C11	GRINA_2	116	8	145065241	1016	CG	0	20	0
P11C11	GRINA_2	133	8	145065224	999	CG	0	16	0
P11C11	GRINA_2	146	8	145065211	986	CG	0	13	0
P11C11	GRINA_2	154	8	145065203	978	CG	2	7	0.285714
P11C11	GRINA_2	156	8	145065201	976	CG	2	7	0.285714
P11C11	GRINA_2	165	8	145065192	967	CG	2	7	0.285714
P11C11	GRINA_2	169	8	145065188	963	CG	0	8	0
P11C11	GRINA_2	173	8	145065184	959	CG	1	8	0.125
P11C11	GRINA_2	176	8	145065181	956	CG	1	8	0.125
P11C11	GRINA_2	179	8	145065178	953	CG	0	8	0
P11C11	GRINA_2	205	8	145065152	927	CG	1	7	0.142857
P11C11	GRINA_2	228	8	145065129	904	CG	0	8	0
P11C11	GRINA_2	232	8	145065125	900	CG	0	8	0
P11C11	HMGCR_1	34	5	74632656	-336	CG	8	917	0.0087241
P11C11	HMGCR_1	39	5	74632651	-341	CG	4	915	0.00437158
P11C11	HMGCR_1	51	5	74632639	-353	CG	11	915	0.0120219
P11C11	HMGCR_1	64	5	74632626	-366	CG	7	915	0.00765027
P11C11	HMGCR_1	89	5	74632601	-391	CG	3	915	0.00327869
P11C11	HMGCR_1	91	5	74632599	-393	CG	9	917	0.00981461
P11C11	HMGCR_1	110	5	74632580	-412	CG	22	1082	0.0203327
P11C11	HMGCR_1	116	5	74632574	-418	CG	11	1082	0.0101664
P11C11	HMGCR_1	157	5	74632533	-459	CG	5	915	0.00546448
P11C11	HMGCR_1	160	5	74632530	-462	CG	1	915	0.0010929
P11C11	HMGCR_1	163	5	74632527	-465	CG	6	915	0.00655738
P11C11	HMGCR_1	188	5	74632502	-490	CG	5	916	0.00545852
P11C11	HMGCR_1	195	5	74632495	-497	CG	6	916	0.00655022
P11C11	HMGCR_1	204	5	74632486	-506	CG	3	916	0.00327511
P11C11	HMGCR_1	212	5	74632478	-514	CG	7	915	0.00765027
P11C11	HMGCR_2_	26	5	74632952	-40	CG	9	1918	0.00469239
P11C11	HMGCR_2_	34	5	74632944	-48	CG	6	1927	0.00311365
P11C11	HMGCR_2_	37	5	74632941	-51	CG	11	1932	0.00569358
P11C11	HMGCR_2_	42	5	74632936	-56	CG	10	2116	0.0047259
P11C11	HMGCR_2_	47	5	74632931	-61	CG	16	2135	0.00749415
P11C11	HMGCR_2_	51	5	74632927	-65	CG	16	2139	0.00748013
P11C11	HMGCR_2_	55	5	74632923	-69	CG	13	2142	0.00606909
P11C11	HMGCR_2_	67	5	74632911	-81	CG	13	2141	0.00607193
P11C11	HMGCR_2_	102	5	74632876	-116	CG	17	2141	0.00794021
P11C11	HMGCR_2_	119	5	74632859	-133	CG	15	2142	0.0070028
P11C11	HMGCR_2_	124	5	74632854	-138	CG	12	2141	0.00560486
P11C11	HMGCR_2_	139	5	74632839	-153	CG	21	2141	0.0098085
P11C11	HMGCR_2_	143	5	74632835	-157	CG	11	2141	0.00513779
P11C11	HMGCR_3	37	5	74633233	241	CG	4	818	0.00488998
P11C11	HMGCR_3	57	5	74633253	261	CG	3	840	0.00357143
P11C11	HMGCR_3	69	5	74633265	273	CG	32	1196	0.0267559
P11C11	HMGCR_3	87	5	74633283	291	CG	42	1323	0.031746
P11C11	HMGCR_3	93	5	74633289	297	CG	37	1321	0.0280091
P11C11	HMGCR_3	101	5	74633297	305	CG	28	1323	0.021164
P11C11	HMGCR_3	114	5	74633310	318	CG	19	1322	0.0143722
P11C11	HMGCR_3	120	5	74633316	324	CG	18	1323	0.0136054
P11C11	HMGCR_3	122	5	74633318	326	CG	26	1323	0.0196523
P11C11	HMGCR_3	151	5	74633347	355	CG	11	1266	0.00868878
P11C11	HMGCR_3	159	5	74633355	363	CG	9	845	0.0106509
P11C11	HMGCR_3	163	5	74633359	367	CG	4	845	0.00473373
P11C11	HMGCR_3	166	5	74633362	370	CG	7	844	0.00829384
P11C11	HMGCR_3	170	5	74633366	374	CG	16	845	0.0189349
P11C11	HMGCR_3	182	5	74633378	386	CG	4	845	0.00473373
P11C11	HMGCR_3	192	5	74633388	396	CG	6	845	0.00710059
P11C11	INSIG1_1	27	7	155089031	-450	CG	1	808	0.00123762
P11C11	INSIG1_1	51	7	155089007	-474	CG	2	818	0.00244499
P11C11	INSIG1_1	71	7	155088987	-494	CG	9	817	0.0110159
P11C11	INSIG1_1	96	7	155088962	-519	CG	3	817	0.00367197
P11C11	INSIG1_1	119	7	155088939	-542	CG	22	1008	0.0218254
P11C11	INSIG1_1	121	7	155088937	-544	CG	26	1016	0.0255906
P11C11	INSIG1_1	143	7	155088915	-566	CG	6	1019	0.00588813
P11C11	INSIG1_1	148	7	155088910	-571	CG	12	1019	0.0117763
P11C11	INSIG1_1	151	7	155088907	-574	CG	7	1012	0.006917
P11C11	INSIG1_1	161	7	155088897	-584	CG	32	818	0.0391198
P11C11	INSIG1_1	167	7	155088891	-590	CG	16	818	0.0195599
P11C11	INSIG1_1	173	7	155088885	-596	CG	6	818	0.00733496
P11C11	INSIG1_1	190	7	155088868	-613	CG	19	818	0.0232274
P11C11	INSIG1_1	195	7	155088863	-618	CG	8	818	0.00977995
P11C11	INSIG1_1	204	7	155088854	-627	CG	7	818	0.00855746
P11C11	INSIG1_1	225	7	155088833	-648	CG	3	818	0.00366748
P11C11	INSIG1_1	236	7	155088822	-659	CG	13	818	0.0158924
P11C11	INSIG1_2	24	7	155089471	-10	CG	3	69	0.0434783
P11C11	INSIG1_2	29	7	155089466	-15	CG	1	70	0.0142857
P11C11	INSIG1_2	33	7	155089462	-19	CG	0	71	0
P11C11	INSIG1_2	35	7	155089460	-21	CG	2	72	0.0277778
P11C11	INSIG1_2	41	7	155089454	-27	CG	2	72	0.0277778
P11C11	INSIG1_2	45	7	155089450	-31	CG	0	72	0
P11C11	INSIG1_2	49	7	155089446	-35	CG	0	71	0
P11C11	INSIG1_2	51	7	155089444	-37	CG	2	71	0.028169
P11C11	INSIG1_2	64	7	155089431	-50	CG	0	71	0
P11C11	INSIG1_2	68	7	155089427	-54	CG	0	71	0
P11C11	INSIG1_2	85	7	155089410	-71	CG	1	70	0.0142857
P11C11	INSIG1_2	88	7	155089407	-74	CG	2	70	0.0285714
P11C11	INSIG1_2	100	7	155089395	-86	CG	2	96	0.0208333
P11C11	INSIG1_2	104	7	155089391	-90	CG/rs541020266	3	98	0.0306122
P11C11	INSIG1_2	110	7	155089385	-96	CG	2	99	0.020202
P11C11	INSIG1_2	116	7	155089379	-102	CG	4	99	0.040404
P11C11	INSIG1_2	119	7	155089376	-105	CG	5	99	0.0505051
P11C11	INSIG1_2	124	7	155089371	-110	CG	6	99	0.0606061
P11C11	INSIG1_2	126	7	155089369	-112	CG	4	99	0.040404
P11C11	INSIG1_2	128	7	155089367	-114	CG	2	99	0.020202
P11C11	INSIG1_2	134	7	155089361	-120	CG	1	99	0.010101
P11C11	INSIG1_2	138	7	155089357	-124	CG	4	99	0.040404
P11C11	INSIG1_2	147	7	155089348	-133	CG	2	99	0.020202
P11C11	INSIG1_2	152	7	155089343	-138	CG	1	73	0.0136986
P11C11	INSIG1_2	159	7	155089336	-145	CG	0	71	0
P11C11	INSIG1_2	164	7	155089331	-150	CG	1	71	0.0140845
P11C11	INSIG1_2	166	7	155089329	-152	CG	1	71	0.0140845
P11C11	INSIG1_2	171	7	155089324	-157	CG	1	71	0.0140845
P11C11	INSIG1_2	177	7	155089318	-163	CG	0	71	0
P11C11	INSIG1_2	184	7	155089311	-170	CG	6	71	0.084507
P11C11	INSIG1_2	186	7	155089309	-172	CG	0	71	0
P11C11	INSIG1_2	192	7	155089303	-178	CG	1	71	0.0140845
P11C11	INSIG1_2	196	7	155089299	-182	CG	1	71	0.0140845
P11C11	INSIG1_2	206	7	155089289	-192	CG	0	70	0
P11C11	INSIG1_2	212	7	155089283	-198	CG	1	72	0.0138889
P11C11	INSIG1_2	220	7	155089275	-206	CG	1	72	0.0138889
P11C11	INSIG1_2	224	7	155089271	-210	CG	0	72	0
P11C11	INSIG1_3	28	7	155090118	637	CG	3	1295	0.0023166
P11C11	INSIG1_3	34	7	155090124	643	CG	7	1295	0.00540541
P11C11	INSIG1_3	51	7	155090141	660	CG	14	1294	0.0108192
P11C11	INSIG1_3	58	7	155090148	667	CG	2	1296	0.00154321
P11C11	INSIG1_3	66	7	155090156	675	CG	6	1297	0.00462606
P11C11	INSIG1_3	70	7	155090160	679	CG	12	1478	0.00811908
P11C11	INSIG1_3	79	7	155090169	688	CG	13	1538	0.00845254
P11C11	INSIG1_3	81	7	155090171	690	CG	16	1540	0.0103896
P11C11	INSIG1_3	92	7	155090182	701	CG	24	1542	0.0155642
P11C11	INSIG1_3	102	7	155090192	711	CG	15	1542	0.00972763
P11C11	INSIG1_3	109	7	155090199	718	CG	16	1542	0.0103761
P11C11	INSIG1_3	115	7	155090205	724	CG	8	1542	0.00518807
P11C11	INSIG1_3	121	7	155090211	730	CG	8	1542	0.00518807
P11C11	INSIG1_3	152	7	155090242	761	CG	23	1324	0.0173716
P11C11	INSIG1_3	172	7	155090262	781	CG	7	1294	0.00540958
P11C11	INSIG1_3	183	7	155090273	792	CG	4	1293	0.00309358
P11C11	INSIG2_	28	2	118846072	79	CG	0	9	0
P11C11	INSIG2_	40	2	118846084	91	CG	1	12	0.0833333
P11C11	INSIG2_	63	2	118846107	114	CG	2	18	0.111111
P11C11	INSIG2_	69	2	118846113	120	CG	2	18	0.111111
P11C11	INSIG2_	91	2	118846135	142	CG	0	22	0
P11C11	INSIG2_	94	2	118846138	145	CG	0	22	0
P11C11	INSIG2_	99	2	118846143	150	CG	0	22	0
P11C11	INSIG2_	101	2	118846145	152	CG	0	18	0
P11C11	INSIG2_	108	2	118846152	159	CG	0	18	0
P11C11	INSIG2_	125	2	118846169	176	CG	0	17	0
P11C11	LDLRAP1_1	22	1	25870384	309	CG	4	382	0.0104712
P11C11	LDLRAP1_1	25	1	25870387	312	CG	3	382	0.0078534
P11C11	LDLRAP1_1	30	1	25870392	317	CG	2	383	0.00522193
P11C11	LDLRAP1_1	36	1	25870398	323	CG	2	384	0.00520833
P11C11	LDLRAP1_1	39	1	25870401	326	CG	3	386	0.00777202
P11C11	LDLRAP1_1	52	1	25870414	339	CG	7	619	0.0113086
P11C11	LDLRAP1_1	60	1	25870422	347	CG	27	689	0.0391872
P11C11	LDLRAP1_1	73	1	25870435	360	CG	34	707	0.0480905
P11C11	LDLRAP1_1	77	1	25870439	364	CG	17	702	0.0242165
P11C11	LDLRAP1_1	100	1	25870462	387	CG	4	705	0.00567376
P11C11	LDLRAP1_1	103	1	25870465	390	CG	15	705	0.0212766
P11C11	LDLRAP1_1	107	1	25870469	394	CG	15	704	0.0213068
P11C11	LDLRAP1_1	111	1	25870473	398	CG	13	705	0.0184397
P11C11	LDLRAP1_1	117	1	25870479	404	CG	11	704	0.015625
P11C11	LDLRAP1_1	122	1	25870484	409	CG	14	703	0.0199147
P11C11	LDLRAP1_1	135	1	25870497	422	CG	2	702	0.002849
P11C11	LDLRAP1_1	151	1	25870513	438	CG	9	673	0.013373
P11C11	LDLRAP1_1	157	1	25870519	444	CG	4	381	0.0104987
P11C11	LDLRAP1_1	176	1	25870538	463	CG	4	382	0.0104712
P11C11	LDLRAP1_2	24	1	25870665	590	CG	6	854	0.00702576
P11C11	LDLRAP1_2	42	1	25870683	608	CG	0	857	0
P11C11	LDLRAP1_2	48	1	25870689	614	CG	9	854	0.0105386
P11C11	LDLRAP1_2	53	1	25870694	619	CG	11	854	0.0128806
P11C11	LDLRAP1_2	63	1	25870704	629	CG	24	854	0.028103
P11C11	LDLRAP1_2	81	1	25870722	647	CG	7	856	0.00817757
P11C11	LDLRAP1_2	84	1	25870725	650	CG	11	916	0.0120087
P11C11	LDLRAP1_2	104	1	25870745	670	CG	5	969	0.00515996
P11C11	LDLRAP1_2	112	1	25870753	678	CG	10	962	0.010395
P11C11	LDLRAP1_2	123	1	25870764	689	CG	12	967	0.0124095
P11C11	LDLRAP1_2	131	1	25870772	697	CG	5	967	0.00517063
P11C11	LDLRAP1_2	149	1	25870790	715	CG	6	969	0.00619195
P11C11	LDLRAP1_2	181	1	25870822	747	CG	35	858	0.0407925
P11C11	LDLRAP1_2	187	1	25870828	753	CG	45	856	0.0525701
P11C11	LDLRAP1_2	195	1	25870836	761	CG	75	850	0.0882353
P11C11	LDLRAP1_2	213	1	25870854	779	CG	60	850	0.0705882
P11C11	LDLR_	38	19	11200847	810	CG	1	205	0.00487805
P11C11	LDLR_	58	19	11200827	790	CG	3	753	0.00398406
P11C11	LDLR_	62	19	11200823	786	CG	80	951	0.084122
P11C11	LDLR_	66	19	11200819	782	CG	140	1014	0.138067
P11C11	LDLR_	68	19	11200817	780	CG	36	1032	0.0348837
P11C11	LDLR_	78	19	11200807	770	CG	117	1134	0.103175
P11C11	LDLR_	118	19	11200767	730	CG	77	1863	0.0413312
P11C11	LDLR_	125	19	11200760	723	CG	392	1845	0.212466
P11C11	LDLR_	156	19	11200729	692	CG	499	1829	0.272827
P11C11	LDLR_	184	19	11200701	664	CG	301	2027	0.148495
P11C11	LDLR_	188	19	11200697	660	CG	406	2030	0.2
P11C11	LDLR_	201	19	11200684	647	CG	275	1963	0.140092
P11C11	LDLR_	221	19	11200664	627	CG	332	3345	0.0992526
P11C11	LIMA1_	34	12	50677255	98	CG	0	72	0
P11C11	LIMA1_	37	12	50677258	95	CG	1	72	0.0138889
P11C11	LIMA1_	49	12	50677270	83	CG	0	72	0
P11C11	LIMA1_	58	12	50677279	74	CG	3	72	0.0416667
P11C11	LIMA1_	60	12	50677281	72	CG	1	72	0.0138889
P11C11	LIMA1_	90	12	50677311	42	CG	0	91	0
P11C11	LIMA1_	96	12	50677317	36	CG	0	95	0
P11C11	LIMA1_	101	12	50677322	31	CG	2	95	0.0210526
P11C11	LIMA1_	108	12	50677329	24	CG	1	95	0.0105263
P11C11	LIMA1_	115	12	50677336	17	CG	5	105	0.047619
P11C11	LIMA1_	118	12	50677339	14	CG	5	105	0.047619
P11C11	LIMA1_	120	12	50677341	12	CG	0	107	0
P11C11	LIMA1_	126	12	50677347	6	CG	4	106	0.0377358
P11C11	LIMA1_	128	12	50677349	4	CG	1	102	0.00980392
P11C11	LIMA1_	132	12	50677353	0	CG	0	99	0
P11C11	LIMA1_	147	12	50677368	-15	CG	1	100	0.01
P11C11	LIMA1_	151	12	50677372	-19	CG	1	100	0.01
P11C11	LIMA1_	157	12	50677378	-25	CG	1	94	0.0106383
P11C11	LIMA1_	166	12	50677387	-34	CG	1	92	0.0108696
P11C11	LIMA1_	170	12	50677391	-38	CG	1	94	0.0106383
P11C11	LIMA1_	172	12	50677393	-40	CG	1	93	0.0107527
P11C11	LIMA1_	178	12	50677399	-46	CG	1	89	0.011236
P11C11	LIMA1_	184	12	50677405	-52	CG	1	91	0.010989
P11C11	LIMA1_	193	12	50677414	-61	CG	1	91	0.010989
P11C11	LIMA1_	197	12	50677418	-65	CG	1	93	0.0107527
P11C11	LIMA1_	199	12	50677420	-67	CG	4	93	0.0430108
P11C11	LIMA1_	212	12	50677433	-80	CG	2	96	0.0208333
P11C11	LIMA1_	220	12	50677441	-88	CG	3	92	0.0326087
P11C11	LIMA1_	225	12	50677446	-93	CG	2	80	0.025
P11C11	LIMA1_	230	12	50677451	-98	CG	4	77	0.0519481
P11C11	LIMA1_	236	12	50677457	-104	CG	0	68	0
P11C11	LIMA1_	239	12	50677460	-107	CG	0	62	0
P11C11	MBTPS1_1	29	16	84150906	-358	CG	6	703	0.00853485
P11C11	MBTPS1_1	33	16	84150902	-354	CG	81	703	0.11522
P11C11	MBTPS1_1	48	16	84150887	-339	CG	33	1081	0.0305273
P11C11	MBTPS1_1	53	16	84150882	-334	CG	50	1157	0.0432152
P11C11	MBTPS1_1	56	16	84150879	-331	CG	44	1171	0.0375747
P11C11	MBTPS1_1	67	16	84150868	-320	CG	39	1171	0.0333049
P11C11	MBTPS1_1	90	16	84150845	-297	CG	25	1171	0.0213493
P11C11	MBTPS1_1	92	16	84150843	-295	CG	32	1171	0.0273271
P11C11	MBTPS1_1	94	16	84150841	-293	CG	28	1171	0.0239112
P11C11	MBTPS1_1	101	16	84150834	-286	CG	25	1171	0.0213493
P11C11	MBTPS1_1	112	16	84150823	-275	CG	2	1171	0.00170794
P11C11	MBTPS1_1	132	16	84150803	-255	CG	24	1171	0.0204953
P11C11	MBTPS1_1	134	16	84150801	-253	CG	16	1169	0.0136869
P11C11	MBTPS1_1	151	16	84150784	-236	CG	7	1189	0.0058873
P11C11	MBTPS1_2	30	16	84150102	446	CG	35	1760	0.0198864
P11C11	MBTPS1_2	48	16	84150084	464	CG	47	2055	0.022871
P11C11	MBTPS1_2	62	16	84150070	478	CG	30	2085	0.0143885
P11C11	MBTPS1_2	77	16	84150055	493	CG/rs79340982	45	2086	0.0215724
P11C11	MBTPS1_2	108	16	84150024	524	CG	18	2087	0.00862482
P11C11	MBTPS1_2	114	16	84150018	530	CG	32	2083	0.0153625
P11C11	MBTPS1_2	128	16	84150004	544	CG	21	2087	0.0100623
P11C11	MBTPS1_2	144	16	84149988	560	CG	16	2087	0.00766651
P11C11	MBTPS1_2	147	16	84149985	563	CG	33	2086	0.0158198
P11C11	MBTPS1_2	165	16	84149967	581	CG	12	1762	0.00681044
P11C11	MBTPS2_	30	X	21857660	5	CG	15	940	0.0159574
P11C11	MBTPS2_	41	X	21857649	-6	CG	18	1032	0.0174419
P11C11	MBTPS2_	57	X	21857633	-22	CG	21	1120	0.01875
P11C11	MBTPS2_	61	X	21857629	-26	CG	29	1121	0.0258698
P11C11	MBTPS2_	65	X	21857625	-30	CG	20	1121	0.0178412
P11C11	MBTPS2_	69	X	21857621	-34	CG	36	1122	0.0320856
P11C11	MBTPS2_	75	X	21857615	-40	CG	24	1122	0.0213904
P11C11	MBTPS2_	91	X	21857599	-56	CG	15	1123	0.0133571
P11C11	MBTPS2_	97	X	21857593	-62	CG	27	1123	0.0240427
P11C11	MBTPS2_	115	X	21857575	-80	CG	20	1123	0.0178094
P11C11	MBTPS2_	160	X	21857530	-125	CG	6	937	0.00640342
P11C11	MYLIP_1	36	6	16129080	-236	CG	2	270	0.00740741
P11C11	MYLIP_1	46	6	16129070	-246	CG	4	270	0.0148148
P11C11	MYLIP_1	53	6	16129063	-253	CG	2	272	0.00735294
P11C11	MYLIP_1	56	6	16129060	-256	CG	3	272	0.0110294
P11C11	MYLIP_1	72	6	16129044	-272	CG	1	287	0.00348432
P11C11	MYLIP_1	76	6	16129040	-276	CG	1	294	0.00340136
P11C11	MYLIP_1	80	6	16129036	-280	CG	2	294	0.00680272
P11C11	MYLIP_1	92	6	16129024	-292	CG	1	294	0.00340136
P11C11	MYLIP_1	98	6	16129018	-298	CG	2	294	0.00680272
P11C11	MYLIP_1	109	6	16129007	-309	CG	1	291	0.00343643
P11C11	MYLIP_1	114	6	16129002	-314	CG	3	291	0.0103093
P11C11	MYLIP_1	122	6	16128994	-322	CG	1	291	0.00343643
P11C11	MYLIP_1	182	6	16128934	-382	CG	4	271	0.0147601
P11C11	MYLIP_1	189	6	16128927	-389	CG	1	271	0.00369004
P11C11	MYLIP_2	25	6	16129870	554	CG	0	22	0
P11C11	MYLIP_2	29	6	16129874	558	CG	0	22	0
P11C11	MYLIP_2	36	6	16129881	565	CG	0	22	0
P11C11	MYLIP_2	42	6	16129887	571	CG	0	22	0
P11C11	MYLIP_2	59	6	16129904	588	CG	1	32	0.03125
P11C11	MYLIP_2	91	6	16129936	620	CG	2	36	0.0555556
P11C11	MYLIP_2	101	6	16129946	630	CG	1	38	0.0263158
P11C11	MYLIP_2	107	6	16129952	636	CG	0	39	0
P11C11	MYLIP_2	118	6	16129963	647	CG	1	37	0.027027
P11C11	MYLIP_2	130	6	16129975	659	CG	0	37	0
P11C11	MYLIP_2	138	6	16129983	667	CG	2	35	0.0571429
P11C11	MYLIP_2	145	6	16129990	674	CG	0	37	0
P11C11	MYLIP_2	153	6	16129998	682	CG	0	30	0
P11C11	MYLIP_2	155	6	16130000	684	CG	0	28	0
P11C11	MYLIP_2	158	6	16130003	687	CG	1	28	0.0357143
P11C11	MYLIP_2	175	6	16130020	704	CG	0	26	0
P11C11	MYLIP_2	177	6	16130022	706	CG	0	27	0
P11C11	NPC1L1_	74	7	44582788	-1874	CG	401	457	0.877462
P11C11	NPC1L1_	79	7	44582783	-1869	CG	386	457	0.844639
P11C11	NPC1L1_	96	7	44582766	-1852	CG	474	502	0.944223
P11C11	NPC1L1_	116	7	44582746	-1832	CG	469	504	0.930556
P11C11	NPC1L1_	142	7	44582720	-1806	CG	438	496	0.883065
P11C11	NPC1L1_	147	7	44582715	-1801	CG	441	483	0.913043
P11C11	NPC1L1_	157	7	44582705	-1791	CG	426	449	0.948775
P11C11	NPC1L1_	170	7	44582692	-1778	CG	414	449	0.922049
P11C11	NUMB_	25	14	73924991	295	CG	22	2638	0.00833965
P11C11	NUMB_	36	14	73924980	306	CG	32	2634	0.0121488
P11C11	NUMB_	52	14	73924964	322	CG	23	3373	0.00681886
P11C11	NUMB_	56	14	73924960	326	CG	64	3480	0.0183908
P11C11	NUMB_	62	14	73924954	332	CG	54	3560	0.0151685
P11C11	NUMB_	64	14	73924952	334	CG	90	3561	0.0252738
P11C11	NUMB_	66	14	73924950	336	CG	100	3562	0.0280741
P11C11	NUMB_	93	14	73924923	363	CG	41	3568	0.011491
P11C11	NUMB_	106	14	73924910	376	CG	39	3568	0.0109305
P11C11	NUMB_	114	14	73924902	384	CG	24	3563	0.0067359
P11C11	NUMB_	116	14	73924900	386	CG	37	3563	0.0103845
P11C11	NUMB_	123	14	73924893	393	CG	19	3560	0.00533708
P11C11	NUMB_	126	14	73924890	396	CG	31	3562	0.00870298
P11C11	NUMB_	160	14	73924856	430	CG	26	2638	0.00985595
P11C11	NUMB_	166	14	73924850	436	CG	14	2639	0.00530504
P11C11	PCSK9_1	39	1	55505386	238	CG	126	1555	0.0810289
P11C11	PCSK9_1	41	1	55505384	236	CG	95	1555	0.0610932
P11C11	PCSK9_1	51	1	55505374	226	CG	121	1556	0.0777635
P11C11	PCSK9_1	53	1	55505372	224	CG	75	1556	0.0482005
P11C11	PCSK9_1	55	1	55505370	222	CG	178	1556	0.114396
P11C11	PCSK9_1	81	1	55505344	196	CG	30	1556	0.0192802
P11C11	PCSK9_1	92	1	55505333	185	CG	60	1730	0.0346821
P11C11	PCSK9_1	95	1	55505330	182	CG	29	1744	0.0166284
P11C11	PCSK9_1	97	1	55505328	180	CG	42	1747	0.0240412
P11C11	PCSK9_1	102	1	55505323	175	CG	29	1746	0.0166094
P11C11	PCSK9_1	107	1	55505318	170	CG	54	1745	0.0309456
P11C11	PCSK9_1	111	1	55505314	166	CG	39	1745	0.0223496
P11C11	PCSK9_1	164	1	55505261	113	CG	69	1559	0.0442591
P11C11	PCSK9_1	167	1	55505258	110	CG	82	1577	0.0519975
P11C11	PCSK9_1	170	1	55505255	107	CG	86	1577	0.0545339
P11C11	PCSK9_1	174	1	55505251	103	CG	149	1577	0.0944832
P11C11	PCSK9_1	190	1	55505235	87	CG	101	1578	0.0640051
P11C11	PCSK9_1	195	1	55505230	82	CG	102	1578	0.0646388
P11C11	PCSK9_1	198	1	55505227	79	CG	65	1578	0.0411914
P11C11	PCSK9_1	201	1	55505224	76	CG	104	1578	0.0659062
P11C11	PCSK9_1	206	1	55505219	71	CG	305	1578	0.193283
P11C11	PCSK9_2	28	1	55505679	531	CG	38	1547	0.0245637
P11C11	PCSK9_2	37	1	55505670	522	CG	100	1544	0.0647668
P11C11	PCSK9_2	46	1	55505661	513	CG	82	1546	0.0530401
P11C11	PCSK9_2	55	1	55505652	504	CG	78	1463	0.0533151
P11C11	PCSK9_2	60	1	55505647	499	CG	156	1556	0.100257
P11C11	PCSK9_2	82	1	55505625	477	CG	147	1874	0.0784418
P11C11	PCSK9_2	88	1	55505619	471	CG	82	1885	0.0435013
P11C11	PCSK9_2	91	1	55505616	468	CG	97	1886	0.0514316
P11C11	PCSK9_2	97	1	55505610	462	CG	56	1883	0.0297398
P11C11	PCSK9_2	107	1	55505600	452	CG	111	1885	0.0588859
P11C11	PCSK9_2	111	1	55505596	448	CG	50	1884	0.0265393
P11C11	PCSK9_2	115	1	55505592	444	CG	123	1885	0.065252
P11C11	PCSK9_2	119	1	55505588	440	CG	55	1880	0.0292553
P11C11	PCSK9_2	121	1	55505586	438	CG	37	1881	0.0196704
P11C11	PCSK9_2	161	1	55505546	398	CG	49	1549	0.0316333
P11C11	PCSK9_2	174	1	55505533	385	CG	49	1547	0.0316742
P11C11	PCSK9_2	187	1	55505520	372	CG	53	1547	0.0342599
P11C11	RNF139_	45	8	125486843	-164	CG	27	2944	0.0091712
P11C11	RNF139_	55	8	125486833	-174	CG	25	2944	0.00849185
P11C11	RNF139_	60	8	125486828	-179	CG	28	2945	0.00950764
P11C11	RNF139_	66	8	125486822	-185	CG	22	2939	0.00748554
P11C11	RNF139_	73	8	125486815	-192	CG	26	2921	0.00890106
P11C11	RNF139_	80	8	125486808	-199	CG	19	2938	0.00646698
P11C11	RNF139_	82	8	125486806	-201	CG	23	2946	0.0078072
P11C11	RNF139_	89	8	125486799	-208	CG	22	3023	0.00727754
P11C11	RNF139_	92	8	125486796	-211	CG	24	3047	0.0078766
P11C11	RNF139_	115	8	125486773	-234	CG	27	3049	0.00885536
P11C11	RNF139_	123	8	125486765	-242	CG	13	3054	0.00425671
P11C11	RNF139_	131	8	125486757	-250	CG	35	3054	0.0114604
P11C11	RNF139_	135	8	125486753	-254	CG	22	3054	0.00720367
P11C11	RNF139_	140	8	125486748	-259	CG	26	3054	0.00851343
P11C11	RNF139_	149	8	125486739	-268	CG	30	3049	0.00983929
P11C11	RNF139_	151	8	125486737	-270	CG	24	3028	0.00792602
P11C11	RNF139_	169	8	125486719	-288	CG	27	2936	0.00919619
P11C11	RNF139_	191	8	125486697	-310	CG	19	2936	0.00647139
P11C11	SCAP_	33	3	47517159	290	CG	0	14	0
P11C11	SCAP_	37	3	47517155	294	CG	0	14	0
P11C11	SCAP_	42	3	47517150	299	CG	2	14	0.142857
P11C11	SCAP_	55	3	47517137	312	CG	0	12	0
P11C11	SCAP_	62	3	47517130	319	CG	0	12	0
P11C11	SCAP_	79	3	47517113	336	CG	0	12	0
P11C11	SCAP_	81	3	47517111	338	CG	0	13	0
P11C11	SCAP_	83	3	47517109	340	CG	0	13	0
P11C11	SCAP_	100	3	47517092	357	CG	0	19	0
P11C11	SCAP_	104	3	47517088	361	CG	0	19	0
P11C11	SCAP_	117	3	47517075	374	CG	0	26	0
P11C11	SCAP_	121	3	47517071	378	CG	0	26	0
P11C11	SCAP_	136	3	47517056	393	CG	0	20	0
P11C11	SCAP_	138	3	47517054	395	CG	0	20	0
P11C11	SCAP_	155	3	47517037	412	CG	0	12	0
P11C11	SCAP_	157	3	47517035	414	CG	0	14	0
P11C11	SCAP_	173	3	47517019	430	CG	0	13	0
P11C11	SCAP_	185	3	47517007	442	CG	0	15	0
P11C11	SCAP_	187	3	47517005	444	CG	0	15	0
P11C11	SCAP_	190	3	47517002	447	CG	0	14	0
P11C11	SCAP_	193	3	47516999	450	CG	0	15	0
P11C11	SCAP_	216	3	47516976	473	CG	0	15	0
P11C11	SCYL3_	28	1	169862604	496	CG	1	46	0.0217391
P11C11	SCYL3_	33	1	169862599	501	CG	1	46	0.0217391
P11C11	SCYL3_	39	1	169862593	507	CG	0	46	0
P11C11	SCYL3_	42	1	169862590	510	CG	1	46	0.0217391
P11C11	SCYL3_	47	1	169862585	515	CG/rs998991	2	46	0.0434783
P11C11	SCYL3_	64	1	169862568	532	CG	0	46	0
P11C11	SCYL3_	66	1	169862566	534	CG	0	46	0
P11C11	SCYL3_	72	1	169862560	540	CG	0	46	0
P11C11	SCYL3_	74	1	169862558	542	CG	3	46	0.0652174
P11C11	SCYL3_	86	1	169862546	554	CG	0	46	0
P11C11	SCYL3_	96	1	169862536	564	CG	0	65	0
P11C11	SCYL3_	104	1	169862528	572	CG	2	74	0.027027
P11C11	SCYL3_	117	1	169862515	585	CG	0	76	0
P11C11	SCYL3_	122	1	169862510	590	CG	4	77	0.0519481
P11C11	SCYL3_	132	1	169862500	600	CG	5	77	0.0649351
P11C11	SCYL3_	138	1	169862494	606	CG	1	66	0.0151515
P11C11	SCYL3_	155	1	169862477	623	CG	1	38	0.0263158
P11C11	SCYL3_	157	1	169862475	625	CG	0	39	0
P11C11	SCYL3_	161	1	169862471	629	CG	1	39	0.025641
P11C11	SCYL3_	167	1	169862465	635	CG	0	38	0
P11C11	SCYL3_	175	1	169862457	643	CG	0	38	0
P11C11	SCYL3_	205	1	169862427	673	CG	0	664	0
P11C11	SOAT1_1	32	1	179262824	-24	CG	20	2019	0.00990589
P11C11	SOAT1_1	44	1	179262812	-36	CG	19	2006	0.00947159
P11C11	SOAT1_1	54	1	179262802	-46	CG	16	1773	0.00902425
P11C11	SOAT1_1	58	1	179262798	-50	CG	5	2017	0.00247893
P11C11	SOAT1_1	60	1	179262796	-52	CG	9	2018	0.00445986
P11C11	SOAT1_1	62	1	179262794	-54	CG	17	2016	0.00843254
P11C11	SOAT1_1	70	1	179262786	-62	CG	15	2014	0.00744786
P11C11	SOAT1_1	73	1	179262783	-65	CG	12	2017	0.00594943
P11C11	SOAT1_1	83	1	179262773	-75	CG	15	2016	0.00744048
P11C11	SOAT1_1	124	1	179262732	-116	CG	8	2201	0.00363471
P11C11	SOAT1_1	139	1	179262717	-131	CG	18	2202	0.00817439
P11C11	SOAT1_1	142	1	179262714	-134	CG	10	2202	0.00454133
P11C11	SOAT1_1	195	1	179262661	-187	CG	25	2017	0.0123946
P11C11	SOAT1_1	203	1	179262653	-195	CG	13	2017	0.00644522
P11C11	SOAT1_1	222	1	179262634	-214	CG	15	2017	0.00743679
P11C11	SOAT1_1	227	1	179262629	-219	CG	16	2017	0.00793257
P11C11	SOAT1_2	61	1	179263960	1112	CG	254	1377	0.184459
P11C11	SOAT1_2	63	1	179263958	1110	CG	79	1424	0.0554775
P11C11	SOAT1_2	73	1	179263948	1100	CG	230	1553	0.1481
P11C11	SOAT1_2	101	1	179263920	1072	CG	78	2978	0.0261921
P11C11	SOAT1_2	106	1	179263915	1067	CG	394	2883	0.136663
P11C11	SOAT1_2	110	1	179263911	1063	CG	339	2854	0.118781
P11C11	SOAT1_2	165	1	179263856	1008	CG	518	1848	0.280303
P11C11	SOAT1_2	197	1	179263824	976	CG	427	2070	0.20628
P11C11	SOAT1_2	205	1	179263816	968	CG	337	2168	0.155443
P11C11	SOAT1_2	209	1	179263812	964	CG	355	2073	0.171249
P11C11	SREBF1_1	19	17	17727072	13253	CG	43	988	0.0435223
P11C11	SREBF1_1	21	17	17727074	13251	CG	17	988	0.0172065
P11C11	SREBF1_1	23	17	17727076	13249	CG	11	992	0.0110887
P11C11	SREBF1_1	25	17	17727078	13247	CG	10	991	0.0100908
P11C11	SREBF1_1	36	17	17727089	13236	CG	10	996	0.0100402
P11C11	SREBF1_1	40	17	17727093	13232	CG	9	1049	0.0085796
P11C11	SREBF1_1	42	17	17727095	13230	CG	7	1056	0.00662879
P11C11	SREBF1_1	48	17	17727101	13224	CG	17	1235	0.0137652
P11C11	SREBF1_1	53	17	17727106	13219	CG	12	1282	0.00936037
P11C11	SREBF1_1	63	17	17727116	13209	CG	21	1298	0.0161787
P11C11	SREBF1_1	69	17	17727122	13203	CG	18	1300	0.0138462
P11C11	SREBF1_1	76	17	17727129	13196	CG	14	1293	0.0108275
P11C11	SREBF1_1	91	17	17727144	13181	CG	22	1294	0.0170015
P11C11	SREBF1_1	94	17	17727147	13178	CG	20	1295	0.015444
P11C11	SREBF1_1	97	17	17727150	13175	CG	18	1296	0.0138889
P11C11	SREBF1_1	105	17	17727158	13167	CG	20	1295	0.015444
P11C11	SREBF1_1	117	17	17727170	13155	CG	24	1292	0.0185759
P11C11	SREBF1_1	119	17	17727172	13153	CG	10	1293	0.00773395
P11C11	SREBF1_1	122	17	17727175	13150	CG	11	1295	0.00849421
P11C11	SREBF1_1	147	17	17727200	13125	CG	2	1291	0.00154919
P11C11	SREBF1_1	151	17	17727204	13121	CG	7	1279	0.00547303
P11C11	SREBF1_1	155	17	17727208	13117	CG	15	994	0.0150905
P11C11	SREBF1_1	166	17	17727219	13106	CG	9	993	0.00906344
P11C11	SREBF1_1	170	17	17727223	13102	CG	6	993	0.0060423
P11C11	SREBF1_2_	29	17	17739525	800	CG	8	1168	0.00684932
P11C11	SREBF1_2_	32	17	17739528	797	CG	9	1169	0.00769889
P11C11	SREBF1_2_	39	17	17739535	790	CG	6	1169	0.00513259
P11C11	SREBF1_2_	49	17	17739545	780	CG	7	1168	0.00599315
P11C11	SREBF1_2_	54	17	17739550	775	CG	8	601	0.0133111
P11C11	SREBF1_2_	59	17	17739555	770	CG	2	597	0.00335008
P11C11	SREBF1_2_	70	17	17739566	759	CG	10	597	0.0167504
P11C11	SREBF1_2_	72	17	17739568	757	CG	4	595	0.00672269
P11C11	SREBF1_2_	80	17	17739576	749	CG	13	780	0.0166667
P11C11	SREBF1_2_	88	17	17739584	741	CG	30	805	0.0372671
P11C11	SREBF1_2_	94	17	17739590	735	CG	17	806	0.0210918
P11C11	SREBF1_2_	105	17	17739601	724	CG	5	806	0.00620347
P11C11	SREBF1_2_	108	17	17739604	721	CG	15	806	0.0186104
P11C11	SREBF1_2_	111	17	17739607	718	CG	23	806	0.028536
P11C11	SREBF1_2_	124	17	17739620	705	CG	4	805	0.00496894
P11C11	SREBF1_2_	129	17	17739625	700	CG	23	801	0.0287141
P11C11	SREBF1_2_	142	17	17739638	687	CG	12	801	0.0149813
P11C11	SREBF1_2_	154	17	17739650	675	CG	2	603	0.00331675
P11C11	SREBF1_2_	162	17	17739658	667	CG	6	596	0.0100671
P11C11	SREBF1_2_	167	17	17739663	662	CG	6	598	0.0100334
P11C11	SREBF1_2_	182	17	17739678	647	CG	6	598	0.0100334
P11C11	SREBF1_2_	190	17	17739686	639	CG	11	605	0.0181818
P11C11	SREBF1_2_	193	17	17739689	636	CG	7	599	0.0116861
P11C11	SREBF1_2_	196	17	17739692	633	CG	1	603	0.00165837
P11C11	SREBF1_3_	28	17	17740267	58	CG	2	189	0.010582
P11C11	SREBF1_3_	33	17	17740272	53	CG	1	278	0.00359712
P11C11	SREBF1_3_	36	17	17740275	50	CG	15	308	0.0487013
P11C11	SREBF1_3_	39	17	17740278	47	CG	9	327	0.0275229
P11C11	SREBF1_3_	42	17	17740281	44	CG/rs13306736	8	335	0.0238806
P11C11	SREBF1_3_	54	17	17740293	32	CG	4	339	0.0117994
P11C11	SREBF1_3_	71	17	17740310	15	CG	6	334	0.0179641
P11C11	SREBF1_3_	75	17	17740314	11	CG	7	339	0.020649
P11C11	SREBF1_3_	90	17	17740329	-4	CG	5	340	0.0147059
P11C11	SREBF1_3_	94	17	17740333	-8	CG	5	339	0.0147493
P11C11	SREBF1_3_	99	17	17740338	-13	CG	4	339	0.0117994
P11C11	SREBF1_3_	105	17	17740344	-19	CG	4	339	0.0117994
P11C11	SREBF1_3_	115	17	17740354	-29	CG	2	338	0.00591716
P11C11	SREBF1_3_	126	17	17740365	-40	CG	6	338	0.0177515
P11C11	SREBF1_3_	142	17	17740381	-56	CG	0	335	0
P11C11	SREBF1_3_	148	17	17740387	-62	CG	0	341	0
P11C11	SREBF2_1	35	22	42228553	-529	CG	19	557	0.0341113
P11C11	SREBF2_1	69	22	42228587	-495	CG	3	556	0.00539568
P11C11	SREBF2_1	75	22	42228593	-489	CG	3	557	0.005386
P11C11	SREBF2_1	101	22	42228619	-463	CG	79	967	0.081696
P11C11	SREBF2_1	117	22	42228635	-447	CG	21	968	0.0216942
P11C11	SREBF2_1	125	22	42228643	-439	CG	20	964	0.0207469
P11C11	SREBF2_1	130	22	42228648	-434	CG	21	966	0.0217391
P11C11	SREBF2_1	134	22	42228652	-430	CG	32	968	0.0330579
P11C11	SREBF2_1	156	22	42228674	-408	CG	8	556	0.0143885
P11C11	SREBF2_1	172	22	42228690	-392	CG	14	556	0.0251799
P11C11	SREBF2_1	181	22	42228699	-383	CG	8	556	0.0143885
P11C11	SREBF2_1	206	22	42228724	-358	CG	1	556	0.00179856
P11C11	SREBF2_2	45	22	42228811	-271	CG	5	695	0.00719424
P11C11	SREBF2_2	53	22	42228819	-263	CG	6	695	0.00863309
P11C11	SREBF2_2	60	22	42228826	-256	CG	6	695	0.00863309
P11C11	SREBF2_2	71	22	42228837	-245	CG	5	695	0.00719424
P11C11	SREBF2_2	83	22	42228849	-233	CG	1	695	0.00143885
P11C11	SREBF2_2	101	22	42228867	-215	CG	3	695	0.00431655
P11C11	SREBF2_2	123	22	42228889	-193	CG	6	887	0.00676437
P11C11	SREBF2_2	127	22	42228893	-189	CG	5	888	0.00563063
P11C11	SREBF2_2	144	22	42228910	-172	CG	5	886	0.00564334
P11C11	SREBF2_2	149	22	42228915	-167	CG	5	881	0.00567537
P11C11	SREBF2_2	155	22	42228921	-161	CG	9	695	0.0129496
P11C11	SREBF2_2	157	22	42228923	-159	CG	16	693	0.023088
P11C11	SREBF2_2	197	22	42228963	-119	CG	4	696	0.00574713
P11C11	SREBF2_2	203	22	42228969	-113	CG	5	696	0.00718391
P11C11	SREBF2_2	205	22	42228971	-111	CG	6	696	0.00862069
P11C11	SREBF2_2	218	22	42228984	-98	CG	3	697	0.00430416
P11C11	SREBF2_2	223	22	42228989	-93	CG	9	697	0.0129125
P11C11	SREBF2_2	228	22	42228994	-88	CG	7	698	0.0100287
P11C11	SREBF2_2	232	22	42228998	-84	CG	5	698	0.00716332
P11C11	SREBF2_3	30	22	42230048	966	CG	86	868	0.0990783
P11C11	SREBF2_3	42	22	42230036	954	CG	30	868	0.0345622
P11C11	SREBF2_3	48	22	42230030	948	CG	23	867	0.0265283
P11C11	SREBF2_3	94	22	42229984	902	CG	34	866	0.039261
P11C11	SREBF2_3	108	22	42229970	888	CG	27	943	0.028632
P11C11	SREBF2_3	112	22	42229966	884	CG	12	959	0.012513
P11C11	SREBF2_3	125	22	42229953	871	CG	10	960	0.0104167
P11C11	SREBF2_3	146	22	42229932	850	CG	32	958	0.0334029
P11C11	SREBF2_3	149	22	42229929	847	CG	21	953	0.0220357
P11C11	SREBF2_3	187	22	42229891	809	CG	13	869	0.0149597
P11C11	SREBF2_3	202	22	42229876	794	CG	13	868	0.014977
P11C11	SREBF2_3	204	22	42229874	792	CG	16	868	0.0184332
P11C11	SREBF2_3	213	22	42229865	783	CG	11	867	0.0126874
P11C11	SREBF2_3	216	22	42229862	780	CG	7	867	0.00807382
P11C11	SREBF2_3	225	22	42229853	771	CG	8	866	0.00923788
P11C11	SREBF2_3	228	22	42229850	768	CG	14	867	0.0161476
P11C11	TBL2_1_	37	7	72994558	-1545	CG	46	3138	0.014659
P11C11	TBL2_1_	45	7	72994566	-1553	CG	1309	3131	0.418077
P11C11	TBL2_1_	47	7	72994568	-1555	CG	1182	3128	0.377877
P11C11	TBL2_1_	53	7	72994574	-1561	CG	1448	3165	0.457504
P11C11	TBL2_1_	70	7	72994591	-1578	CG	1625	3582	0.453657
P11C11	TBL2_1_	109	7	72994630	-1617	CG	1392	3601	0.386559
P11C11	TBL2_1_	129	7	72994650	-1637	CG	1520	3598	0.422457
P11C11	TBL2_1_	133	7	72994654	-1641	CG	1599	3603	0.443797
P11C11	TBL2_1_	141	7	72994662	-1649	CG	1671	3589	0.465589
P11C11	TBL2_1_	145	7	72994666	-1653	CG	1434	3591	0.399332
P11C11	TBL2_1_	178	7	72994699	-1686	CG	1475	3146	0.468849
P11C11	TBL2_2	33	7	72994429	-1416	CG	336	2614	0.128539
P11C11	TBL2_2	37	7	72994425	-1412	CG	298	2314	0.128781
P11C11	TBL2_2	44	7	72994418	-1405	CG	158	2152	0.0734201
P11C11	TBL2_2	81	7	72994381	-1368	CG	98	1932	0.0507246
P11C11	TBL2_2	89	7	72994373	-1360	CG	503	1819	0.276526
P11C11	TBL2_2	118	7	72994344	-1331	CG	34	1856	0.018319
P11C11	TBL2_2	131	7	72994331	-1318	CG	263	1848	0.142316
P11C11	TBL2_2	139	7	72994323	-1310	CG	27	3475	0.00776978
P11C11	TBL2_2	155	7	72994307	-1294	CG	338	3314	0.101992
P11C11	TBL2_2	172	7	72994290	-1277	CG	176	2743	0.0641633
P11C11	TBL2_2	177	7	72994285	-1272	CG	501	2708	0.185007
P11C11	TBL2_3	31	7	72992973	40	CG	2	1751	0.0011422
P11C11	TBL2_3	40	7	72992964	49	CG	58	2244	0.0258467
P11C11	TBL2_3	42	7	72992962	51	CG	53	2288	0.0231643
P11C11	TBL2_3	48	7	72992956	57	CG	41	2351	0.0174394
P11C11	TBL2_3	50	7	72992954	59	CG	50	2356	0.0212224
P11C11	TBL2_3	54	7	72992950	63	CG	64	2357	0.0271532
P11C11	TBL2_3	58	7	72992946	67	CG	54	2339	0.0230868
P11C11	TBL2_3	60	7	72992944	69	CG	54	2118	0.0254958
P11C11	TBL2_3	65	7	72992939	74	CG	22	2351	0.00935772
P11C11	TBL2_3	74	7	72992930	83	CG	34	2358	0.014419
P11C11	TBL2_3	78	7	72992926	87	CG	35	2358	0.0148431
P11C11	TBL2_3	82	7	72992922	91	CG	23	2358	0.00975403
P11C11	TBL2_3	86	7	72992918	95	CG	47	2360	0.0199153
P11C11	TBL2_3	88	7	72992916	97	CG	38	2360	0.0161017
P11C11	TBL2_3	135	7	72992869	144	CG	10	2366	0.00422654
P11C11	TBL2_3	144	7	72992860	153	CG	14	2367	0.00591466
P11C11	TBL2_4	27	7	72992812	201	CG	0	4	0
P11C11	TBL2_4	30	7	72992809	204	CG	0	4	0
P11C11	TBL2_4	33	7	72992806	207	CG	0	4	0
P11C11	TBL2_4	36	7	72992803	210	CG	0	4	0
P11C11	TBL2_4	42	7	72992797	216	CG
P11C11	TBL2_4	44	7	72992795	218	CG	0	4	0
P11C11	TBL2_4	56	7	72992783	230	CG	0	1	0
P11C11	TBL2_4	58	7	72992781	232	CG	0	2	0
P11C11	TBL2_4	60	7	72992779	234	CG	0	2	0
P11C11	TBL2_4	76	7	72992763	250	CG	0	2	0
P11C11	TBL2_4	80	7	72992759	254	CG	0	2	0
P11C11	TBL2_4	85	7	72992754	259	CG/rs10225949	0	2	0
P11C11	TBL2_4	101	7	72992738	275	CG	0	42	0
P11C11	TBL2_4	106	7	72992733	280	CG	0	44	0
P11C11	TBL2_4	116	7	72992723	290	CG	0	47	0
P11C11	TBL2_4	121	7	72992718	295	CG	0	17	0
P11C11	TBL2_4	123	7	72992716	297	CG	0	19	0
P11C11	TBL2_4	131	7	72992708	305	CG	0	57	0
P11C11	TBL2_4	138	7	72992701	312	CG	1	58	0.0172414
P11C11	TBL2_4	147	7	72992692	321	CG	1	55	0.0181818
P11C11	TBL2_4	154	7	72992685	328	CG	1	56	0.0178571
P11C11	TBL2_4	161	7	72992678	335	CG	0	56	0
P11C11	UBIAD1_	30	1	11333279	25	CG	3	560	0.00535714
P11C11	UBIAD1_	33	1	11333282	28	CG	4	560	0.00714286
P11C11	UBIAD1_	45	1	11333294	40	CG	3	672	0.00446429
P11C11	UBIAD1_	54	1	11333303	49	CG	51	897	0.0568562
P11C11	UBIAD1_	68	1	11333317	63	CG	35	988	0.0354251
P11C11	UBIAD1_	72	1	11333321	67	CG	29	989	0.0293225
P11C11	UBIAD1_	74	1	11333323	69	CG	30	989	0.0303337
P11C11	UBIAD1_	83	1	11333332	78	CG	30	988	0.0303644
P11C11	UBIAD1_	95	1	11333344	90	CG	4	992	0.00403226
P11C11	UBIAD1_	97	1	11333346	92	CG	22	992	0.0221774
P11C11	UBIAD1_	110	1	11333359	105	CG	8	993	0.00805639
P11C11	UBIAD1_	123	1	11333372	118	CG	13	993	0.0130916
P11C11	UBIAD1_	134	1	11333383	129	CG	15	990	0.0151515
P11C11	UBIAD1_	147	1	11333396	142	CG	8	990	0.00808081
P11C11	UBIAD1_	150	1	11333399	145	CG	4	960	0.00416667
P11C11	UBIAD1_	153	1	11333402	148	CG	7	597	0.0117253
P11C11	UBIAD1_	163	1	11333412	158	CG	7	593	0.0118044
P11C11	USP11_1	27	X	47092405	92	CG	2	396	0.00505051
P11C11	USP11_1	37	X	47092415	102	CG	13	542	0.0239852
P11C11	USP11_1	56	X	47092434	121	CG	10	554	0.0180505
P11C11	USP11_1	60	X	47092438	125	CG	12	554	0.0216606
P11C11	USP11_1	63	X	47092441	128	CG	21	554	0.0379061
P11C11	USP11_1	69	X	47092447	134	CG	15	553	0.0271248
P11C11	USP11_1	72	X	47092450	137	CG	8	553	0.0144665
P11C11	USP11_1	76	X	47092454	141	CG	8	554	0.0144404
P11C11	USP11_1	99	X	47092477	164	CG	8	560	0.0142857
P11C11	USP11_1	102	X	47092480	167	CG	3	560	0.00535714
P11C11	USP11_1	111	X	47092489	176	CG	4	561	0.00713012
P11C11	USP11_1	114	X	47092492	179	CG	1	561	0.00178253
P11C11	USP11_1	120	X	47092498	185	CG	8	560	0.0142857
P11C11	USP11_1	123	X	47092501	188	CG	9	559	0.0161002
P11C11	USP11_1	151	X	47092529	216	CG	2	552	0.00362319
P11C11	USP11_2	33	X	47092953	640	CG	0	4	0
P11C11	USP11_2	39	X	47092959	646	CG	0	4	0
P11C11	USP11_2	41	X	47092961	648	CG	0	4	0
P11C11	USP11_2	48	X	47092968	655	CG	0	4	0
P11C11	USP11_2	53	X	47092973	660	CG	0	4	0
P11C11	USP11_2	73	X	47092993	680	CG	0	4	0
P11C11	USP11_2	80	X	47093000	687	CG	0	7	0
P11C11	USP11_2	87	X	47093007	694	CG	0	8	0
P11C11	USP11_2	96	X	47093016	703	CG	0	8	0
P11C11	USP11_2	101	X	47093021	708	CG	0	8	0
P11C11	USP11_2	111	X	47093031	718	CG	0	8	0
P11C11	USP11_2	116	X	47093036	723	CG	0	8	0
P11C11	USP11_2	128	X	47093048	735	CG	0	8	0
P11C11	USP11_2	142	X	47093062	749	CG	0	8	0
P11C11	USP11_2	153	X	47093073	760	CG	1	4	0.25
P11C11	USP11_2	157	X	47093077	764	CG	0	4	0
P11C11	USP11_2	162	X	47093082	769	CG	0	4	0
P11C11	USP11_2	174	X	47093094	781	CG	0	4	0
P11C11	USP11_2	184	X	47093104	791	CG	0	4	0
P11C11	USP20_1	30	9	132597354	-341	CG	3	1588	0.00188917
P11C11	USP20_1	35	9	132597349	-346	CG	16	1588	0.0100756
P11C11	USP20_1	38	9	132597346	-349	CG	11	1588	0.00692695
P11C11	USP20_1	43	9	132597341	-354	CG	15	1587	0.0094518
P11C11	USP20_1	67	9	132597317	-378	CG	8	1588	0.00503778
P11C11	USP20_1	86	9	132597298	-397	CG	8	1588	0.00503778
P11C11	USP20_1	90	9	132597294	-401	CG	11	1588	0.00692695
P11C11	USP20_1	122	9	132597262	-433	CG	13	2014	0.00645482
P11C11	USP20_1	133	9	132597251	-444	CG	17	2013	0.00844511
P11C11	USP20_1	137	9	132597247	-448	CG	13	2014	0.00645482
P11C11	USP20_1	156	9	132597228	-467	CG/rs149710224	14	1740	0.00804598
P11C11	USP20_1	163	9	132597221	-474	CG	27	1742	0.0154994
P11C11	USP20_1	181	9	132597203	-492	CG	2	1603	0.00124766
P11C11	USP20_1	202	9	132597182	-513	CG	11	1588	0.00692695
P11C11	USP20_2	29	9	132597527	-168	CG	11	1832	0.00600437
P11C11	USP20_2	42	9	132597514	-181	CG	8	1831	0.0043692
P11C11	USP20_2	46	9	132597510	-185	CG	16	1837	0.00870985
P11C11	USP20_2	60	9	132597496	-199	CG	31	2231	0.0138951
P11C11	USP20_2	64	9	132597492	-203	CG	33	2237	0.0147519
P11C11	USP20_2	68	9	132597488	-207	CG	31	2236	0.013864
P11C11	USP20_2	80	9	132597476	-219	CG	18	2226	0.00808625
P11C11	USP20_2	83	9	132597473	-222	CG	10	2236	0.00447227
P11C11	USP20_2	86	9	132597470	-225	CG	18	2236	0.00805009
P11C11	USP20_2	89	9	132597467	-228	CG	12	2221	0.00540297
P11C11	USP20_2	94	9	132597462	-233	CG/rs17851537	18	2235	0.00805369
P11C11	USP20_2	99	9	132597457	-238	CG	27	2234	0.0120859
P11C11	USP20_2	137	9	132597419	-276	CG	28	2234	0.0125336
P11C11	USP20_2	142	9	132597414	-281	CG	16	2234	0.00716204
P11C11	USP20_2	151	9	132597405	-290	CG	13	2188	0.0059415
P11C11	USP20_3	28	9	132598211	516	CG	2	280	0.00714286
P11C11	USP20_3	31	9	132598208	513	CG	0	280	0
P11C11	USP20_3	53	9	132598186	491	CG	5	280	0.0178571
P11C11	USP20_3	79	9	132598160	465	CG	2	280	0.00714286
P11C11	USP20_3	92	9	132598147	452	CG	2	280	0.00714286
P11C11	USP20_3	96	9	132598143	448	CG	2	280	0.00714286
P11C11	USP20_3	113	9	132598126	431	CG	1	395	0.00253165
P11C11	USP20_3	131	9	132598108	413	CG	8	428	0.0186916
P11C11	USP20_3	135	9	132598104	409	CG	6	428	0.0140187
P11C11	USP20_3	140	9	132598099	404	CG	10	428	0.0233645
P11C11	USP20_3	142	9	132598097	402	CG	7	428	0.0163551
P11C11	USP20_3	147	9	132598092	397	CG	4	424	0.00943396
P11C11	USP20_3	152	9	132598087	392	CG	5	297	0.016835
P11C11	USP20_3	154	9	132598085	390	CG	5	280	0.0178571
P11C11	USP20_3	167	9	132598072	377	CG	1	279	0.00358423
P11C11	USP20_3	182	9	132598057	362	CG	1	280	0.00357143
P11C11	USP20_3	202	9	132598037	342	CG	3	280	0.0107143
P11C11	USP20_3	208	9	132598031	336	CG	5	280	0.0178571
P11C11	USP20_3	225	9	132598014	319	CG	4	278	0.0143885
P11D05	AMFR_1_	37	16	56459026	424	CG	7	884	0.00791855
P11D05	AMFR_1_	39	16	56459028	422	CG	3	890	0.00337079
P11D05	AMFR_1_	45	16	56459034	416	CG	20	892	0.0224215
P11D05	AMFR_1_	55	16	56459044	406	CG	6	891	0.00673401
P11D05	AMFR_1_	58	16	56459047	403	CG	5	892	0.00560538
P11D05	AMFR_1_	62	16	56459051	399	CG	9	892	0.0100897
P11D05	AMFR_1_	66	16	56459055	395	CG	3	892	0.00336323
P11D05	AMFR_1_	70	16	56459059	391	CG	3	892	0.00336323
P11D05	AMFR_1_	74	16	56459063	387	CG	6	884	0.00678733
P11D05	AMFR_1_	77	16	56459066	384	CG	9	884	0.010181
P11D05	AMFR_1_	80	16	56459069	381	CG	13	1111	0.0117012
P11D05	AMFR_1_	95	16	56459084	366	CG	21	1197	0.0175439
P11D05	AMFR_1_	101	16	56459090	360	CG	20	1197	0.0167084
P11D05	AMFR_1_	113	16	56459102	348	CG	23	1198	0.0191987
P11D05	AMFR_1_	118	16	56459107	343	CG	20	1197	0.0167084
P11D05	AMFR_1_	121	16	56459110	340	CG	14	1198	0.0116861
P11D05	AMFR_1_	127	16	56459116	334	CG	26	1197	0.021721
P11D05	AMFR_1_	133	16	56459122	328	CG	12	1197	0.0100251
P11D05	AMFR_1_	146	16	56459135	315	CG	8	1190	0.00672269
P11D05	AMFR_1_	148	16	56459137	313	CG	14	1180	0.0118644
P11D05	AMFR_1_	150	16	56459139	311	CG	15	1157	0.0129646
P11D05	AMFR_1_	157	16	56459146	304	CG	8	880	0.00909091
P11D05	AMFR_1_	187	16	56459176	274	CG	11	880	0.0125
P11D05	AMFR_1_	197	16	56459186	264	CG	11	880	0.0125
P11D05	AMFR_1_	207	16	56459196	254	CG	13	889	0.0146232
P11D05	AMFR_2	27	16	56459217	233	CG	1	15	0.0666667
P11D05	AMFR_2	31	16	56459221	229	CG	1	15	0.0666667
P11D05	AMFR_2	44	16	56459234	216	CG	0	15	0
P11D05	AMFR_2	52	16	56459242	208	CG	0	15	0
P11D05	AMFR_2	58	16	56459248	202	CG	0	16	0
P11D05	AMFR_2	61	16	56459251	199	CG	1	16	0.0625
P11D05	AMFR_2	87	16	56459277	173	CG	0	24	0
P11D05	AMFR_2	92	16	56459282	168	CG	1	25	0.04
P11D05	AMFR_2	96	16	56459286	164	CG	0	25	0
P11D05	AMFR_2	106	16	56459296	154	CG	0	25	0
P11D05	AMFR_2	109	16	56459299	151	CG	0	23	0
P11D05	AMFR_2	115	16	56459305	145	CG	1	24	0.0416667
P11D05	AMFR_2	117	16	56459307	143	CG	0	22	0
P11D05	AMFR_2	121	16	56459311	139	CG	0	21	0
P11D05	AMFR_2	124	16	56459314	136	CG	0	23	0
P11D05	AMFR_2	130	16	56459320	130	CG	0	24	0
P11D05	AMFR_2	140	16	56459330	120	CG	0	30	0
P11D05	AMFR_2	143	16	56459333	117	CG	0	28	0
P11D05	AMFR_2	149	16	56459339	111	CG	1	27	0.037037
P11D05	AMFR_2	155	16	56459345	105	CG	0	28	0
P11D05	AMFR_2	161	16	56459351	99	CG	2	27	0.0740741
P11D05	AMFR_2	164	16	56459354	96	CG	1	27	0.037037
P11D05	AMFR_2	167	16	56459357	93	CG	0	27	0
P11D05	AMFR_2	170	16	56459360	90	CG	0	24	0
P11D05	AMFR_2	173	16	56459363	87	CG	0	24	0
P11D05	AMFR_2	175	16	56459365	85	CG	0	24	0
P11D05	AMFR_2	178	16	56459368	82	CG	0	21	0
P11D05	AMFR_2	183	16	56459373	77	CG	1	23	0.0434783
P11D05	AMFR_2	188	16	56459378	72	CG	1	23	0.0434783
P11D05	AMFR_2	193	16	56459383	67	CG	0	22	0
P11D05	AMFR_2	209	16	56459399	51	CG	0	21	0
P11D05	AMFR_2	212	16	56459402	48	CG	0	22	0
P11D05	AMFR_2	217	16	56459407	43	CG	0	15	0
P11D05	AMFR_2	222	16	56459412	38	CG	0	15	0
P11D05	AMFR_2	224	16	56459414	36	CG	0	14	0
P11D05	AMFR_3	94	16	56458225	1225	CG	4	290	0.0137931
P11D05	AMFR_3	197	16	56458122	1328	CG	9	231	0.038961
P11D05	APLP2_1	19	11	129939046	-669	CG	12	2123	0.00565238
P11D05	APLP2_1	22	11	129939049	-666	CG	5	2124	0.00235405
P11D05	APLP2_1	81	11	129939108	-607	CG	46	2287	0.0201137
P11D05	APLP2_1	100	11	129939127	-588	CG	29	2288	0.0126748
P11D05	APLP2_1	115	11	129939142	-573	CG	46	2294	0.0200523
P11D05	APLP2_1	120	11	129939147	-568	CG	27	2293	0.011775
P11D05	APLP2_1	122	11	129939149	-566	CG	20	2294	0.0087184
P11D05	APLP2_1	126	11	129939153	-562	CG	18	2294	0.00784656
P11D05	APLP2_1	138	11	129939165	-550	CG	15	2296	0.0065331
P11D05	APLP2_1	146	11	129939173	-542	CG	6	2291	0.00261894
P11D05	APLP2_1	149	11	129939176	-539	CG	39	2283	0.0170828
P11D05	APLP2_1	163	11	129939190	-525	CG	8	1450	0.00551724
P11D05	APLP2_1	173	11	129939200	-515	CG	4	1446	0.00276625
P11D05	APLP2_1	182	11	129939209	-506	CG	7	1446	0.00484094
P11D05	APLP2_1	184	11	129939211	-504	CG	22	1455	0.0151203
P11D05	APLP2_2	29	11	129939625	-90	CG	2	112	0.0178571
P11D05	APLP2_2	33	11	129939621	-94	CG	0	112	0
P11D05	APLP2_2	42	11	129939612	-103	CG	1	111	0.00900901
P11D05	APLP2_2	44	11	129939610	-105	CG	1	110	0.00909091
P11D05	APLP2_2	46	11	129939608	-107	CG	1	110	0.00909091
P11D05	APLP2_2	53	11	129939601	-114	CG	2	112	0.0178571
P11D05	APLP2_2	57	11	129939597	-118	CG	1	111	0.00900901
P11D05	APLP2_2	63	11	129939591	-124	CG	0	114	0
P11D05	APLP2_2	69	11	129939585	-130	CG	2	121	0.0165289
P11D05	APLP2_2	73	11	129939581	-134	CG	1	150	0.00666667
P11D05	APLP2_2	75	11	129939579	-136	CG	7	154	0.0454545
P11D05	APLP2_2	85	11	129939569	-146	CG	4	158	0.0253165
P11D05	APLP2_2	91	11	129939563	-152	CG	1	154	0.00649351
P11D05	APLP2_2	96	11	129939558	-157	CG	1	154	0.00649351
P11D05	APLP2_2	109	11	129939545	-170	CG	4	154	0.025974
P11D05	APLP2_2	116	11	129939538	-177	CG	4	153	0.0261438
P11D05	APLP2_2	118	11	129939536	-179	CG	4	154	0.025974
P11D05	APLP2_2	124	11	129939530	-185	CG	3	142	0.0211268
P11D05	APLP2_2	128	11	129939526	-189	CG	4	152	0.0263158
P11D05	APLP2_2	130	11	129939524	-191	CG	0	152	0
P11D05	APLP2_2	132	11	129939522	-193	CG	3	152	0.0197368
P11D05	APLP2_2	135	11	129939519	-196	CG	0	152	0
P11D05	APLP2_2	147	11	129939507	-208	CG	0	153	0
P11D05	APLP2_2	161	11	129939493	-222	CG	1	109	0.00917431
P11D05	APLP2_2	163	11	129939491	-224	CG	1	111	0.00900901
P11D05	APLP2_2	182	11	129939472	-243	CG	1	112	0.00892857
P11D05	APLP2_2	189	11	129939465	-250	CG	1	110	0.00909091
P11D05	APLP2_2	192	11	129939462	-253	CG	2	110	0.0181818
P11D05	APLP2_3	25	11	129940479	764	CG	3	380	0.00789474
P11D05	APLP2_3	27	11	129940481	766	CG	1	380	0.00263158
P11D05	APLP2_3	33	11	129940487	772	CG	2	380	0.00526316
P11D05	APLP2_3	40	11	129940494	779	CG	3	380	0.00789474
P11D05	APLP2_3	42	11	129940496	781	CG	5	381	0.0131234
P11D05	APLP2_3	44	11	129940498	783	CG	1	381	0.00262467
P11D05	APLP2_3	46	11	129940500	785	CG	1	382	0.0026178
P11D05	APLP2_3	60	11	129940514	799	CG	1	384	0.00260417
P11D05	APLP2_3	67	11	129940521	806	CG	2	389	0.00514139
P11D05	APLP2_3	79	11	129940533	818	CG	6	391	0.0153453
P11D05	APLP2_3	81	11	129940535	820	CG	3	429	0.00699301
P11D05	APLP2_3	89	11	129940543	828	CG	2	453	0.00441501
P11D05	APLP2_3	93	11	129940547	832	CG	4	454	0.00881057
P11D05	APLP2_3	108	11	129940562	847	CG	2	455	0.0043956
P11D05	APLP2_3	118	11	129940572	857	CG	3	454	0.00660793
P11D05	APLP2_3	123	11	129940577	862	CG	8	449	0.0178174
P11D05	APLP2_3	125	11	129940579	864	CG	3	447	0.00671141
P11D05	APLP2_3	129	11	129940583	868	CG	5	449	0.0111359
P11D05	APLP2_3	131	11	129940585	870	CG	4	449	0.00890869
P11D05	APLP2_3	147	11	129940601	886	CG	2	451	0.00443459
P11D05	APLP2_3	160	11	129940614	899	CG	6	390	0.0153846
P11D05	APLP2_3	164	11	129940618	903	CG	5	389	0.0128535
P11D05	APLP2_3	171	11	129940625	910	CG	1	388	0.00257732
P11D05	APLP2_3	181	11	129940635	920	CG	1	384	0.00260417
P11D05	APLP2_3	192	11	129940646	931	CG	4	388	0.0103093
P11D05	APLP2_3	199	11	129940653	938	CG	3	404	0.00742574
P11D05	APLP2_3	205	11	129940659	944	CG	19	435	0.0436782
P11D05	DAB2_	20	5	39425278	57	CG	12	1377	0.0087146
P11D05	DAB2_	45	5	39425303	32	CG	17	1379	0.0123278
P11D05	DAB2_	48	5	39425306	29	CG	19	1379	0.0137781
P11D05	DAB2_	50	5	39425308	27	CG	32	1379	0.0232052
P11D05	DAB2_	54	5	39425312	23	CG	6	1377	0.0043573
P11D05	DAB2_	61	5	39425319	16	CG	8	1378	0.00580552
P11D05	DAB2_	116	5	39425374	-39	CG	15	1536	0.00976562
P11D05	DAB2_	123	5	39425381	-46	CG	8	1573	0.00508582
P11D05	DAB2_	136	5	39425394	-59	CG	11	1575	0.00698413
P11D05	DAB2_	156	5	39425414	-79	CG	20	1379	0.0145033
P11D05	DAB2_	172	5	39425430	-95	CG	14	1379	0.0101523
P11D05	DAB2_	192	5	39425450	-115	CG	12	1379	0.00870196
P11D05	DCAF8_	23	1	160232354	-4	CG	17	1232	0.0137987
P11D05	DCAF8_	25	1	160232356	-6	CG	4	1234	0.00324149
P11D05	DCAF8_	27	1	160232358	-8	CG	19	1234	0.0153971
P11D05	DCAF8_	35	1	160232366	-16	CG	7	1234	0.00567261
P11D05	DCAF8_	40	1	160232371	-21	CG	14	1234	0.0113452
P11D05	DCAF8_	52	1	160232383	-33	CG	5	1159	0.00431406
P11D05	DCAF8_	59	1	160232390	-40	CG	6	1235	0.0048583
P11D05	DCAF8_	70	1	160232401	-51	CG	5	1437	0.00347947
P11D05	DCAF8_	86	1	160232417	-67	CG	9	1448	0.00621547
P11D05	DCAF8_	98	1	160232429	-79	CG	5	1450	0.00344828
P11D05	DCAF8_	105	1	160232436	-86	CG	16	1450	0.0110345
P11D05	DCAF8_	111	1	160232442	-92	CG	8	1450	0.00551724
P11D05	DCAF8_	119	1	160232450	-100	CG	21	1450	0.0144828
P11D05	DCAF8_	150	1	160232481	-131	CG	8	1438	0.00556328
P11D05	DCAF8_	185	1	160232516	-166	CG	7	1234	0.00567261
P11D05	DENND4C_1	38	9	19229813	-674	CG	36	215	0.167442
P11D05	DENND4C_1	65	9	19229840	-647	CG	13	215	0.0604651
P11D05	DENND4C_1	104	9	19229879	-608	CG	19	266	0.0714286
P11D05	DENND4C_1	118	9	19229893	-594	CG	30	266	0.112782
P11D05	DENND4C_1	122	9	19229897	-590	CG	40	266	0.150376
P11D05	DENND4C_1	124	9	19229899	-588	CG	28	266	0.105263
P11D05	DENND4C_1	164	9	19229939	-548	CG	43	215	0.2
P11D05	DENND4C_1	177	9	19229952	-535	CG	31	186	0.166667
P11D05	DENND4C_1	179	9	19229954	-533	CG	25	186	0.134409
P11D05	DENND4C_1	181	9	19229956	-531	CG	27	186	0.145161
P11D05	DENND4C_2	39	9	19231095	608	CG	0	22	0
P11D05	DENND4C_2	41	9	19231097	610	CG	0	20	0
P11D05	DENND4C_2	44	9	19231100	613	CG	0	12	0
P11D05	DENND4C_2	48	9	19231104	617	CG	0	12	0
P11D05	DENND4C_2	51	9	19231107	620	CG	0	12	0
P11D05	DENND4C_2	66	9	19231122	635	CG	0	11	0
P11D05	DENND4C_2	72	9	19231128	641	CG	0	11	0
P11D05	DENND4C_2	80	9	19231136	649	CG	0	11	0
P11D05	DENND4C_2	82	9	19231138	651	CG	0	11	0
P11D05	DENND4C_2	97	9	19231153	666	CG	0	12	0
P11D05	DENND4C_2	105	9	19231161	674	CG	0	1	0
P11D05	DENND4C_2	108	9	19231164	677	CG	0	1	0
P11D05	DENND4C_2	113	9	19231169	682	CG	0	1	0
P11D05	DENND4C_2	116	9	19231172	685	CG	0	1	0
P11D05	DENND4C_2	120	9	19231176	689	CG	0	1	0
P11D05	DENND4C_2	135	9	19231191	704	CG	0	1	0
P11D05	DENND4C_2	142	9	19231198	711	CG	0	1	0
P11D05	DENND4C_2	157	9	19231213	726	CG
P11D05	DENND4C_2	177	9	19231233	746	CG	0	38	0
P11D05	DENND4C_2	191	9	19231247	760	CG	0	38	0
P11D05	FBXW7_1	26	4	153456861	386	CG	0	82	0
P11D05	FBXW7_1	31	4	153456856	391	CG	0	81	0
P11D05	FBXW7_1	38	4	153456849	398	CG	1	81	0.0123457
P11D05	FBXW7_1	45	4	153456842	405	CG	1	70	0.0142857
P11D05	FBXW7_1	80	4	153456807	440	CG	7	133	0.0526316
P11D05	FBXW7_1	85	4	153456802	445	CG	6	133	0.0451128
P11D05	FBXW7_1	94	4	153456793	454	CG	6	136	0.0441176
P11D05	FBXW7_1	101	4	153456786	461	CG	10	137	0.0729927
P11D05	FBXW7_1	107	4	153456780	467	CG	6	137	0.0437956
P11D05	FBXW7_1	113	4	153456774	473	CG	6	138	0.0434783
P11D05	FBXW7_1	116	4	153456771	476	CG	0	139	0
P11D05	FBXW7_1	119	4	153456768	479	CG	6	140	0.0428571
P11D05	FBXW7_1	123	4	153456764	483	CG	3	139	0.0215827
P11D05	FBXW7_1	129	4	153456758	489	CG	2	139	0.0143885
P11D05	FBXW7_1	133	4	153456754	493	CG	2	136	0.0147059
P11D05	FBXW7_1	142	4	153456745	502	CG	0	147	0
P11D05	FBXW7_1	150	4	153456737	510	CG	0	144	0
P11D05	FBXW7_1	153	4	153456734	513	CG	1	81	0.0123457
P11D05	FBXW7_1	158	4	153456729	518	CG	0	82	0
P11D05	FBXW7_1	166	4	153456721	526	CG	1	80	0.0125
P11D05	FBXW7_1	170	4	153456717	530	CG	0	72	0
P11D05	FBXW7_1	176	4	153456711	536	CG	0	75	0
P11D05	FBXW7_2	27	4	153457427	-180	CG	0	525	0
P11D05	FBXW7_2	30	4	153457430	-183	CG	2	525	0.00380952
P11D05	FBXW7_2	34	4	153457434	-187	CG	1	524	0.0019084
P11D05	FBXW7_2	44	4	153457444	-197	CG	2	525	0.00380952
P11D05	FBXW7_2	49	4	153457449	-202	CG	0	525	0
P11D05	FBXW7_2	54	4	153457454	-207	CG	2	525	0.00380952
P11D05	FBXW7_2	56	4	153457456	-209	CG	3	525	0.00571429
P11D05	FBXW7_2	63	4	153457463	-216	CG	3	527	0.0056926
P11D05	FBXW7_2	69	4	153457469	-222	CG	6	528	0.0113636
P11D05	FBXW7_2	75	4	153457475	-228	CG	3	524	0.00572519
P11D05	FBXW7_2	78	4	153457478	-231	CG	1	527	0.00189753
P11D05	FBXW7_2	84	4	153457484	-237	CG	8	527	0.0151803
P11D05	FBXW7_2	92	4	153457492	-245	CG	1	527	0.00189753
P11D05	FBXW7_2	96	4	153457496	-249	CG	8	527	0.0151803
P11D05	FBXW7_2	98	4	153457498	-251	CG	5	539	0.00927644
P11D05	FBXW7_2	129	4	153457529	-282	CG	15	802	0.0187032
P11D05	FBXW7_2	134	4	153457534	-287	CG	11	802	0.0137157
P11D05	FBXW7_2	148	4	153457548	-301	CG	15	801	0.0187266
P11D05	FBXW7_2	152	4	153457552	-305	CG	10	550	0.0181818
P11D05	FBXW7_2	169	4	153457569	-322	CG	3	524	0.00572519
P11D05	FBXW7_2	175	4	153457575	-328	CG	9	525	0.0171429
P11D05	FBXW7_2	199	4	153457599	-352	CG	0	523	0
P11D05	FBXW7_2	209	4	153457609	-362	CG	9	521	0.0172745
P11D05	FBXW7_3	22	4	153456043	1204	CG	5	746	0.00670241
P11D05	FBXW7_3	25	4	153456040	1207	CG	10	746	0.0134048
P11D05	FBXW7_3	101	4	153455964	1283	CG	9	907	0.00992282
P11D05	FBXW7_3	157	4	153455908	1339	CG	3	747	0.00401606
P11D05	FBXW7_3	185	4	153455880	1367	CG	7	748	0.00935829
P11D05	FBXW7_3	215	4	153455850	1397	CG	11	748	0.0147059
P11D05	FLOT1_1	35	6	30710226	402	CG	55	2419	0.0227367
P11D05	FLOT1_1	37	6	30710224	404	CG	22	2419	0.00909467
P11D05	FLOT1_1	60	6	30710201	427	CG	46	2419	0.0190161
P11D05	FLOT1_1	63	6	30710198	430	CG	10	2418	0.00413565
P11D05	FLOT1_1	85	6	30710176	452	CG	93	3722	0.0249866
P11D05	FLOT1_1	91	6	30710170	458	CG	213	3740	0.0569519
P11D05	FLOT1_1	142	6	30710119	509	CG	55	3739	0.0147098
P11D05	FLOT1_1	165	6	30710096	532	CG	43	2419	0.0177759
P11D05	FLOT1_1	170	6	30710091	537	CG	29	2535	0.0114398
P11D05	FLOT1_1	175	6	30710086	542	CG	39	2535	0.0153846
P11D05	FLOT1_1	199	6	30710062	566	CG	11	2535	0.00433925
P11D05	FLOT1_2	25	6	30710615	13	CG	3	729	0.00411523
P11D05	FLOT1_2	46	6	30710636	-8	CG	12	743	0.0161507
P11D05	FLOT1_2	58	6	30710648	-20	CG	7	743	0.00942127
P11D05	FLOT1_2	72	6	30710662	-34	CG	19	708	0.0268362
P11D05	FLOT1_2	81	6	30710671	-43	CG	2	708	0.00282486
P11D05	FLOT1_2	87	6	30710677	-49	CG	2	708	0.00282486
P11D05	FLOT1_2	90	6	30710680	-52	CG	4	708	0.00564972
P11D05	FLOT1_2	92	6	30710682	-54	CG	2	708	0.00282486
P11D05	FLOT1_2	97	6	30710687	-59	CG	1	708	0.00141243
P11D05	FLOT1_2	102	6	30710692	-64	CG	18	709	0.0253879
P11D05	FLOT1_2	108	6	30710698	-70	CG	6	709	0.00846262
P11D05	FLOT1_2	128	6	30710718	-90	CG	8	725	0.0110345
P11D05	FLOT1_2	143	6	30710733	-105	CG	9	726	0.0123967
P11D05	FLOT1_2	165	6	30710755	-127	CG	4	710	0.0056338
P11D05	FLOT1_2	171	6	30710761	-133	CG	4	709	0.00564175
P11D05	FLOT1_2	174	6	30710764	-136	CG	9	709	0.0126939
P11D05	FLOT1_2	176	6	30710766	-138	CG	1	709	0.00141044
P11D05	FLOT1_2	198	6	30710788	-160	CG	1	707	0.00141443
P11D05	FLOT1_2	226	6	30710816	-188	CG	10	707	0.0141443
P11D05	FLOT1_2	233	6	30710823	-195	CG	0	707	0
P11D05	FLOT1_3	35	6	30711760	-1132	CG	16	338	0.0473373
P11D05	FLOT1_3	42	6	30711767	-1139	CG	3	459	0.00653595
P11D05	FLOT1_3	51	6	30711776	-1148	CG	13	560	0.0232143
P11D05	FLOT1_3	71	6	30711796	-1168	CG	4	570	0.00701754
P11D05	FLOT1_3	77	6	30711802	-1174	CG	16	570	0.0280702
P11D05	FLOT1_3	80	6	30711805	-1177	CG/rs3094124	10	565	0.0176991
P11D05	FLOT1_3	96	6	30711821	-1193	CG	10	570	0.0175439
P11D05	FLOT1_3	107	6	30711832	-1204	CG	6	570	0.0105263
P11D05	FLOT1_3	110	6	30711835	-1207	CG	4	570	0.00701754
P11D05	FLOT1_3	119	6	30711844	-1216	CG	8	569	0.0140598
P11D05	FLOT1_3	138	6	30711863	-1235	CG	6	571	0.0105079
P11D05	FLOT1_3	141	6	30711866	-1238	CG	2	571	0.00350263
P11D05	FLOT1_4	30	6	30712007	-1379	CG	1	97	0.0103093
P11D05	FLOT1_4	45	6	30712022	-1394	CG	0	98	0
P11D05	FLOT1_4	50	6	30712027	-1399	CG	0	99	0
P11D05	FLOT1_4	74	6	30712051	-1423	CG	1	103	0.00970874
P11D05	FLOT1_4	81	6	30712058	-1430	CG	1	104	0.00961538
P11D05	FLOT1_4	83	6	30712060	-1432	CG	0	104	0
P11D05	FLOT1_4	96	6	30712073	-1445	CG	0	103	0
P11D05	FLOT1_4	99	6	30712076	-1448	CG	0	103	0
P11D05	FLOT1_4	113	6	30712090	-1462	CG	3	161	0.0186335
P11D05	FLOT1_4	131	6	30712108	-1480	CG	16	180	0.0888889
P11D05	FLOT1_4	137	6	30712114	-1486	CG	12	180	0.0666667
P11D05	FLOT1_4	143	6	30712120	-1492	CG	6	179	0.0335196
P11D05	FLOT1_4	150	6	30712127	-1499	CG	8	178	0.0449438
P11D05	FLOT1_4	152	6	30712129	-1501	CG	8	103	0.0776699
P11D05	FLOT1_4	159	6	30712136	-1508	CG	14	98	0.142857
P11D05	FLOT1_4	167	6	30712144	-1516	CG	8	97	0.0824742
P11D05	FLOT1_4	171	6	30712148	-1520	CG	6	97	0.0618557
P11D05	FLOT1_4	181	6	30712158	-1530	CG	4	97	0.0412371
P11D05	FLOT1_4	186	6	30712163	-1535	CG	2	96	0.0208333
P11D05	FLOT1_4	193	6	30712170	-1542	CG	3	96	0.03125
P11D05	FLOT1_4	204	6	30712181	-1553	CG	2	96	0.0208333
P11D05	FLOT1_4	225	6	30712202	-1574	CG	0	96	0
P11D05	FLOT1_4	233	6	30712210	-1582	CG	1	96	0.0104167
P11D05	FLOT1_4	236	6	30712213	-1585	CG	0	96	0
P11D05	FLOT2_	22	17	27224667	48	CG	2	426	0.00469484
P11D05	FLOT2_	24	17	27224665	50	CG	1	429	0.002331
P11D05	FLOT2_	28	17	27224661	54	CG	1	433	0.00230947
P11D05	FLOT2_	31	17	27224658	57	CG	4	440	0.00909091
P11D05	FLOT2_	42	17	27224647	68	CG	16	695	0.0230216
P11D05	FLOT2_	55	17	27224634	81	CG	33	718	0.045961
P11D05	FLOT2_	65	17	27224624	91	CG	31	709	0.0437236
P11D05	FLOT2_	71	17	27224618	97	CG	18	708	0.0254237
P11D05	FLOT2_	82	17	27224607	108	CG	4	706	0.00566572
P11D05	FLOT2_	87	17	27224602	113	CG	13	709	0.0183357
P11D05	FLOT2_	90	17	27224599	116	CG	16	709	0.022567
P11D05	FLOT2_	93	17	27224596	119	CG	27	708	0.0381356
P11D05	FLOT2_	113	17	27224576	139	CG	10	708	0.0141243
P11D05	FLOT2_	126	17	27224563	152	CG	8	709	0.0112835
P11D05	FLOT2_	131	17	27224558	157	CG	7	709	0.00987306
P11D05	FLOT2_	155	17	27224534	181	CG	12	401	0.0299252
P11D05	FLOT2_	158	17	27224531	184	CG	5	401	0.0124688
P11D05	GRINA_1	23	8	145064621	396	CG	0	203	0
P11D05	GRINA_1	29	8	145064627	402	CG	0	203	0
P11D05	GRINA_1	34	8	145064632	407	CG	3	203	0.0147783
P11D05	GRINA_1	36	8	145064634	409	CG	0	203	0
P11D05	GRINA_1	49	8	145064647	422	CG	1	207	0.00483092
P11D05	GRINA_1	55	8	145064653	428	CG	4	207	0.0193237
P11D05	GRINA_1	69	8	145064667	442	CG	0	208	0
P11D05	GRINA_1	73	8	145064671	446	CG	1	209	0.00478469
P11D05	GRINA_1	86	8	145064684	459	CG	2	216	0.00925926
P11D05	GRINA_1	91	8	145064689	464	CG	0	216	0
P11D05	GRINA_1	98	8	145064696	471	CG	2	218	0.00917431
P11D05	GRINA_1	102	8	145064700	475	CG	2	218	0.00917431
P11D05	GRINA_1	114	8	145064712	487	CG	1	218	0.00458716
P11D05	GRINA_1	118	8	145064716	491	CG	1	218	0.00458716
P11D05	GRINA_1	123	8	145064721	496	CG	4	220	0.0181818
P11D05	GRINA_1	129	8	145064727	502	CG	0	218	0
P11D05	GRINA_1	152	8	145064750	525	CG	0	213	0
P11D05	GRINA_1	159	8	145064757	532	CG	5	213	0.0234742
P11D05	GRINA_1	168	8	145064766	541	CG	3	207	0.0144928
P11D05	GRINA_1	171	8	145064769	544	CG	2	208	0.00961538
P11D05	GRINA_1	191	8	145064789	564	CG	1	205	0.00487805
P11D05	GRINA_1	198	8	145064796	571	CG	2	206	0.00970874
P11D05	GRINA_1	209	8	145064807	582	CG	0	205	0
P11D05	GRINA_1	223	8	145064821	596	CG	2	204	0.00980392
P11D05	GRINA_2	31	8	145065326	1101	CG	0	12	0
P11D05	GRINA_2	37	8	145065320	1095	CG	0	15	0
P11D05	GRINA_2	40	8	145065317	1092	CG	2	15	0.133333
P11D05	GRINA_2	55	8	145065302	1077	CG	0	12	0
P11D05	GRINA_2	102	8	145065255	1030	CG	0	12	0
P11D05	GRINA_2	116	8	145065241	1016	CG	0	15	0
P11D05	GRINA_2	133	8	145065224	999	CG	1	13	0.0769231
P11D05	GRINA_2	146	8	145065211	986	CG	1	13	0.0769231
P11D05	GRINA_2	154	8	145065203	978	CG	0	8	0
P11D05	GRINA_2	156	8	145065201	976	CG	0	8	0
P11D05	GRINA_2	165	8	145065192	967	CG	1	7	0.142857
P11D05	GRINA_2	169	8	145065188	963	CG	0	7	0
P11D05	GRINA_2	173	8	145065184	959	CG	0	8	0
P11D05	GRINA_2	176	8	145065181	956	CG	0	8	0
P11D05	GRINA_2	179	8	145065178	953	CG	0	7	0
P11D05	GRINA_2	205	8	145065152	927	CG	0	5	0
P11D05	GRINA_2	228	8	145065129	904	CG	0	5	0
P11D05	GRINA_2	232	8	145065125	900	CG	1	5	0.2
P11D05	HMGCR_1	34	5	74632656	-336	CG	2	721	0.00277393
P11D05	HMGCR_1	39	5	74632651	-341	CG	5	721	0.00693481
P11D05	HMGCR_1	51	5	74632639	-353	CG	9	721	0.0124827
P11D05	HMGCR_1	64	5	74632626	-366	CG	4	721	0.00554785
P11D05	HMGCR_1	89	5	74632601	-391	CG	11	721	0.0152566
P11D05	HMGCR_1	91	5	74632599	-393	CG	9	721	0.0124827
P11D05	HMGCR_1	110	5	74632580	-412	CG	2	853	0.00234467
P11D05	HMGCR_1	116	5	74632574	-418	CG	3	854	0.00351288
P11D05	HMGCR_1	157	5	74632533	-459	CG	8	721	0.0110957
P11D05	HMGCR_1	160	5	74632530	-462	CG	3	720	0.00416667
P11D05	HMGCR_1	163	5	74632527	-465	CG	1	721	0.00138696
P11D05	HMGCR_1	188	5	74632502	-490	CG	6	721	0.00832178
P11D05	HMGCR_1	195	5	74632495	-497	CG	12	721	0.0166436
P11D05	HMGCR_1	204	5	74632486	-506	CG	3	720	0.00416667
P11D05	HMGCR_1	212	5	74632478	-514	CG	6	721	0.00832178
P11D05	HMGCR_2_	26	5	74632952	-40	CG	12	1921	0.00624675
P11D05	HMGCR_2_	34	5	74632944	-48	CG	10	1929	0.00518403
P11D05	HMGCR_2_	37	5	74632941	-51	CG	17	1933	0.00879462
P11D05	HMGCR_2_	42	5	74632936	-56	CG	25	2119	0.011798
P11D05	HMGCR_2_	47	5	74632931	-61	CG	15	2138	0.0070159
P11D05	HMGCR_2_	51	5	74632927	-65	CG	4	2144	0.00186567
P11D05	HMGCR_2_	55	5	74632923	-69	CG	15	2147	0.00698649
P11D05	HMGCR_2_	67	5	74632911	-81	CG	32	2147	0.0149045
P11D05	HMGCR_2_	102	5	74632876	-116	CG	38	2146	0.0177074
P11D05	HMGCR_2_	119	5	74632859	-133	CG	11	2146	0.00512582
P11D05	HMGCR_2_	124	5	74632854	-138	CG	23	2146	0.0107176
P11D05	HMGCR_2_	139	5	74632839	-153	CG	21	2146	0.00978565
P11D05	HMGCR_2_	143	5	74632835	-157	CG	16	2146	0.00745573
P11D05	HMGCR_3	37	5	74633233	241	CG	1	583	0.00171527
P11D05	HMGCR_3	57	5	74633253	261	CG	6	596	0.0100671
P11D05	HMGCR_3	69	5	74633265	273	CG	32	853	0.0375147
P11D05	HMGCR_3	87	5	74633283	291	CG	39	954	0.0408805
P11D05	HMGCR_3	93	5	74633289	297	CG	37	954	0.0387841
P11D05	HMGCR_3	101	5	74633297	305	CG	30	954	0.0314465
P11D05	HMGCR_3	114	5	74633310	318	CG	12	954	0.0125786
P11D05	HMGCR_3	120	5	74633316	324	CG	16	953	0.0167891
P11D05	HMGCR_3	122	5	74633318	326	CG	21	954	0.0220126
P11D05	HMGCR_3	151	5	74633347	355	CG	13	889	0.0146232
P11D05	HMGCR_3	159	5	74633355	363	CG	11	595	0.0184874
P11D05	HMGCR_3	163	5	74633359	367	CG	15	596	0.0251678
P11D05	HMGCR_3	166	5	74633362	370	CG	7	596	0.011745
P11D05	HMGCR_3	170	5	74633366	374	CG	6	595	0.010084
P11D05	HMGCR_3	182	5	74633378	386	CG	7	596	0.011745
P11D05	HMGCR_3	192	5	74633388	396	CG	8	596	0.0134228
P11D05	INSIG1_1	27	7	155089031	-450	CG	2	591	0.00338409
P11D05	INSIG1_1	51	7	155089007	-474	CG	4	603	0.0066335
P11D05	INSIG1_1	71	7	155088987	-494	CG	3	602	0.00498339
P11D05	INSIG1_1	96	7	155088962	-519	CG	3	602	0.00498339
P11D05	INSIG1_1	119	7	155088939	-542	CG	14	733	0.0190996
P11D05	INSIG1_1	121	7	155088937	-544	CG	24	745	0.0322148
P11D05	INSIG1_1	143	7	155088915	-566	CG	8	759	0.0105402
P11D05	INSIG1_1	148	7	155088910	-571	CG	4	758	0.00527704
P11D05	INSIG1_1	151	7	155088907	-574	CG	7	752	0.00930851
P11D05	INSIG1_1	161	7	155088897	-584	CG	15	602	0.0249169
P11D05	INSIG1_1	167	7	155088891	-590	CG	6	602	0.00996678
P11D05	INSIG1_1	173	7	155088885	-596	CG	4	602	0.00664452
P11D05	INSIG1_1	190	7	155088868	-613	CG	3	602	0.00498339
P11D05	INSIG1_1	195	7	155088863	-618	CG	5	602	0.00830565
P11D05	INSIG1_1	204	7	155088854	-627	CG	9	602	0.0149502
P11D05	INSIG1_1	225	7	155088833	-648	CG	6	602	0.00996678
P11D05	INSIG1_1	236	7	155088822	-659	CG	14	601	0.0232945
P11D05	INSIG1_2	24	7	155089471	-10	CG	1	61	0.0163934
P11D05	INSIG1_2	29	7	155089466	-15	CG	0	62	0
P11D05	INSIG1_2	33	7	155089462	-19	CG	1	62	0.016129
P11D05	INSIG1_2	35	7	155089460	-21	CG	0	62	0
P11D05	INSIG1_2	41	7	155089454	-27	CG	1	62	0.016129
P11D05	INSIG1_2	45	7	155089450	-31	CG	4	62	0.0645161
P11D05	INSIG1_2	49	7	155089446	-35	CG	0	62	0
P11D05	INSIG1_2	51	7	155089444	-37	CG	0	62	0
P11D05	INSIG1_2	64	7	155089431	-50	CG	0	61	0
P11D05	INSIG1_2	68	7	155089427	-54	CG	0	61	0
P11D05	INSIG1_2	85	7	155089410	-71	CG	0	61	0
P11D05	INSIG1_2	88	7	155089407	-74	CG	1	61	0.0163934
P11D05	INSIG1_2	100	7	155089395	-86	CG	1	76	0.0131579
P11D05	INSIG1_2	104	7	155089391	-90	CG/rs541020266	0	78	0
P11D05	INSIG1_2	110	7	155089385	-96	CG	3	78	0.0384615
P11D05	INSIG1_2	116	7	155089379	-102	CG	0	78	0
P11D05	INSIG1_2	119	7	155089376	-105	CG	0	78	0
P11D05	INSIG1_2	124	7	155089371	-110	CG	0	78	0
P11D05	INSIG1_2	126	7	155089369	-112	CG	1	78	0.0128205
P11D05	INSIG1_2	128	7	155089367	-114	CG	2	78	0.025641
P11D05	INSIG1_2	134	7	155089361	-120	CG	0	78	0
P11D05	INSIG1_2	138	7	155089357	-124	CG	1	78	0.0128205
P11D05	INSIG1_2	147	7	155089348	-133	CG	0	78	0
P11D05	INSIG1_2	152	7	155089343	-138	CG	3	61	0.0491803
P11D05	INSIG1_2	159	7	155089336	-145	CG	2	61	0.0327869
P11D05	INSIG1_2	164	7	155089331	-150	CG	5	61	0.0819672
P11D05	INSIG1_2	166	7	155089329	-152	CG	1	61	0.0163934
P11D05	INSIG1_2	171	7	155089324	-157	CG	1	61	0.0163934
P11D05	INSIG1_2	177	7	155089318	-163	CG	0	61	0
P11D05	INSIG1_2	184	7	155089311	-170	CG	6	61	0.0983607
P11D05	INSIG1_2	186	7	155089309	-172	CG	0	61	0
P11D05	INSIG1_2	192	7	155089303	-178	CG	0	61	0
P11D05	INSIG1_2	196	7	155089299	-182	CG	1	61	0.0163934
P11D05	INSIG1_2	206	7	155089289	-192	CG	1	63	0.015873
P11D05	INSIG1_2	212	7	155089283	-198	CG	0	64	0
P11D05	INSIG1_2	220	7	155089275	-206	CG	1	64	0.015625
P11D05	INSIG1_2	224	7	155089271	-210	CG	0	64	0
P11D05	INSIG1_3	28	7	155090118	637	CG	10	1159	0.00862813
P11D05	INSIG1_3	34	7	155090124	643	CG	10	1159	0.00862813
P11D05	INSIG1_3	51	7	155090141	660	CG	3	1157	0.00259291
P11D05	INSIG1_3	58	7	155090148	667	CG	2	1159	0.00172563
P11D05	INSIG1_3	66	7	155090156	675	CG	4	1161	0.00344531
P11D05	INSIG1_3	70	7	155090160	679	CG	7	1298	0.00539291
P11D05	INSIG1_3	79	7	155090169	688	CG	20	1375	0.0145455
P11D05	INSIG1_3	81	7	155090171	690	CG	20	1376	0.0145349
P11D05	INSIG1_3	92	7	155090182	701	CG	17	1376	0.0123547
P11D05	INSIG1_3	102	7	155090192	711	CG	9	1376	0.0065407
P11D05	INSIG1_3	109	7	155090199	718	CG	9	1376	0.0065407
P11D05	INSIG1_3	115	7	155090205	724	CG	16	1375	0.0116364
P11D05	INSIG1_3	121	7	155090211	730	CG	11	1375	0.008
P11D05	INSIG1_3	152	7	155090242	761	CG	16	1177	0.0135939
P11D05	INSIG1_3	172	7	155090262	781	CG	8	1154	0.00693241
P11D05	INSIG1_3	183	7	155090273	792	CG	16	1154	0.0138648
P11D05	INSIG2_	28	2	118846072	79	CG	0	8	0
P11D05	INSIG2_	40	2	118846084	91	CG	0	10	0
P11D05	INSIG2_	63	2	118846107	114	CG	0	15	0
P11D05	INSIG2_	69	2	118846113	120	CG	0	16	0
P11D05	INSIG2_	91	2	118846135	142	CG	0	27	0
P11D05	INSIG2_	94	2	118846138	145	CG	0	25	0
P11D05	INSIG2_	99	2	118846143	150	CG	0	25	0
P11D05	INSIG2_	101	2	118846145	152	CG	2	17	0.117647
P11D05	INSIG2_	108	2	118846152	159	CG	0	17	0
P11D05	INSIG2_	125	2	118846169	176	CG	0	14	0
P11D05	LDLRAP1_1	22	1	25870384	309	CG	5	387	0.0129199
P11D05	LDLRAP1_1	25	1	25870387	312	CG	0	387	0
P11D05	LDLRAP1_1	30	1	25870392	317	CG	1	385	0.0025974
P11D05	LDLRAP1_1	36	1	25870398	323	CG	1	388	0.00257732
P11D05	LDLRAP1_1	39	1	25870401	326	CG	3	388	0.00773196
P11D05	LDLRAP1_1	52	1	25870414	339	CG	22	619	0.0355412
P11D05	LDLRAP1_1	60	1	25870422	347	CG	42	704	0.0596591
P11D05	LDLRAP1_1	73	1	25870435	360	CG	31	719	0.0431154
P11D05	LDLRAP1_1	77	1	25870439	364	CG	28	718	0.0389972
P11D05	LDLRAP1_1	100	1	25870462	387	CG	7	720	0.00972222
P11D05	LDLRAP1_1	103	1	25870465	390	CG	13	720	0.0180556
P11D05	LDLRAP1_1	107	1	25870469	394	CG	17	718	0.0236769
P11D05	LDLRAP1_1	111	1	25870473	398	CG	15	720	0.0208333
P11D05	LDLRAP1_1	117	1	25870479	404	CG	18	721	0.0249653
P11D05	LDLRAP1_1	122	1	25870484	409	CG	12	721	0.0166436
P11D05	LDLRAP1_1	135	1	25870497	422	CG	10	720	0.0138889
P11D05	LDLRAP1_1	151	1	25870513	438	CG	3	693	0.004329
P11D05	LDLRAP1_1	157	1	25870519	444	CG	2	386	0.00518135
P11D05	LDLRAP1_1	176	1	25870538	463	CG	4	385	0.0103896
P11D05	LDLRAP1_2	24	1	25870665	590	CG	13	399	0.0325815
P11D05	LDLRAP1_2	42	1	25870683	608	CG	2	400	0.005
P11D05	LDLRAP1_2	48	1	25870689	614	CG	5	401	0.0124688
P11D05	LDLRAP1_2	53	1	25870694	619	CG	17	401	0.042394
P11D05	LDLRAP1_2	63	1	25870704	629	CG	5	401	0.0124688
P11D05	LDLRAP1_2	81	1	25870722	647	CG	10	400	0.025
P11D05	LDLRAP1_2	84	1	25870725	650	CG	6	436	0.0137615
P11D05	LDLRAP1_2	104	1	25870745	670	CG	4	458	0.00873362
P11D05	LDLRAP1_2	112	1	25870753	678	CG	6	455	0.0131868
P11D05	LDLRAP1_2	123	1	25870764	689	CG	4	455	0.00879121
P11D05	LDLRAP1_2	131	1	25870772	697	CG	3	454	0.00660793
P11D05	LDLRAP1_2	149	1	25870790	715	CG	2	461	0.00433839
P11D05	LDLRAP1_2	181	1	25870822	747	CG	2	405	0.00493827
P11D05	LDLRAP1_2	187	1	25870828	753	CG	10	406	0.0246305
P11D05	LDLRAP1_2	195	1	25870836	761	CG	25	396	0.0631313
P11D05	LDLRAP1_2	213	1	25870854	779	CG	26	395	0.0658228
P11D05	LDLR_	38	19	11200847	810	CG	0	164	0
P11D05	LDLR_	58	19	11200827	790	CG	4	949	0.00421496
P11D05	LDLR_	62	19	11200823	786	CG	112	1213	0.0923331
P11D05	LDLR_	66	19	11200819	782	CG	235	1283	0.183164
P11D05	LDLR_	68	19	11200817	780	CG	59	1305	0.0452107
P11D05	LDLR_	78	19	11200807	770	CG	210	1373	0.15295
P11D05	LDLR_	118	19	11200767	730	CG	96	2643	0.0363224
P11D05	LDLR_	125	19	11200760	723	CG	664	2617	0.253726
P11D05	LDLR_	156	19	11200729	692	CG	776	2780	0.279137
P11D05	LDLR_	184	19	11200701	664	CG	443	2957	0.149814
P11D05	LDLR_	188	19	11200697	660	CG	661	2951	0.223992
P11D05	LDLR_	201	19	11200684	647	CG	427	2836	0.150564
P11D05	LDLR_	221	19	11200664	627	CG	510	4876	0.104594
P11D05	LIMA1_	34	12	50677255	98	CG	0	25	0
P11D05	LIMA1_	37	12	50677258	95	CG	0	25	0
P11D05	LIMA1_	49	12	50677270	83	CG	0	24	0
P11D05	LIMA1_	58	12	50677279	74	CG	0	24	0
P11D05	LIMA1_	60	12	50677281	72	CG	0	24	0
P11D05	LIMA1_	90	12	50677311	42	CG	0	39	0
P11D05	LIMA1_	96	12	50677317	36	CG	1	41	0.0243902
P11D05	LIMA1_	101	12	50677322	31	CG	0	42	0
P11D05	LIMA1_	108	12	50677329	24	CG	0	42	0
P11D05	LIMA1_	115	12	50677336	17	CG	0	48	0
P11D05	LIMA1_	118	12	50677339	14	CG	2	47	0.0425532
P11D05	LIMA1_	120	12	50677341	12	CG	0	46	0
P11D05	LIMA1_	126	12	50677347	6	CG	0	48	0
P11D05	LIMA1_	128	12	50677349	4	CG	0	48	0
P11D05	LIMA1_	132	12	50677353	0	CG	0	45	0
P11D05	LIMA1_	147	12	50677368	-15	CG	1	47	0.0212766
P11D05	LIMA1_	151	12	50677372	-19	CG	0	48	0
P11D05	LIMA1_	157	12	50677378	-25	CG	0	44	0
P11D05	LIMA1_	166	12	50677387	-34	CG	0	43	0
P11D05	LIMA1_	170	12	50677391	-38	CG	0	44	0
P11D05	LIMA1_	172	12	50677393	-40	CG	0	44	0
P11D05	LIMA1_	178	12	50677399	-46	CG	0	40	0
P11D05	LIMA1_	184	12	50677405	-52	CG	0	43	0
P11D05	LIMA1_	193	12	50677414	-61	CG	0	42	0
P11D05	LIMA1_	197	12	50677418	-65	CG	0	44	0
P11D05	LIMA1_	199	12	50677420	-67	CG	3	44	0.0681818
P11D05	LIMA1_	212	12	50677433	-80	CG	0	43	0
P11D05	LIMA1_	220	12	50677441	-88	CG	0	45	0
P11D05	LIMA1_	225	12	50677446	-93	CG	0	34	0
P11D05	LIMA1_	230	12	50677451	-98	CG	2	34	0.0588235
P11D05	LIMA1_	236	12	50677457	-104	CG	1	30	0.0333333
P11D05	LIMA1_	239	12	50677460	-107	CG	0	22	0
P11D05	MBTPS1_1	29	16	84150906	-358	CG	5	296	0.0168919
P11D05	MBTPS1_1	33	16	84150902	-354	CG	28	296	0.0945946
P11D05	MBTPS1_1	48	16	84150887	-339	CG	13	453	0.0286976
P11D05	MBTPS1_1	53	16	84150882	-334	CG	20	494	0.0404858
P11D05	MBTPS1_1	56	16	84150879	-331	CG	30	496	0.0604839
P11D05	MBTPS1_1	67	16	84150868	-320	CG	21	496	0.0423387
P11D05	MBTPS1_1	90	16	84150845	-297	CG	15	495	0.030303
P11D05	MBTPS1_1	92	16	84150843	-295	CG	20	496	0.0403226
P11D05	MBTPS1_1	94	16	84150841	-293	CG	10	496	0.0201613
P11D05	MBTPS1_1	101	16	84150834	-286	CG	12	496	0.0241935
P11D05	MBTPS1_1	112	16	84150823	-275	CG	2	496	0.00403226
P11D05	MBTPS1_1	132	16	84150803	-255	CG	18	496	0.0362903
P11D05	MBTPS1_1	134	16	84150801	-253	CG	5	496	0.0100806
P11D05	MBTPS1_1	151	16	84150784	-236	CG	3	538	0.00557621
P11D05	MBTPS1_2	30	16	84150102	446	CG	14	964	0.0145228
P11D05	MBTPS1_2	48	16	84150084	464	CG	28	1169	0.0239521
P11D05	MBTPS1_2	62	16	84150070	478	CG	17	1190	0.0142857
P11D05	MBTPS1_2	77	16	84150055	493	CG/rs79340982	37	1191	0.0310663
P11D05	MBTPS1_2	108	16	84150024	524	CG	9	1191	0.00755668
P11D05	MBTPS1_2	114	16	84150018	530	CG	6	1191	0.00503778
P11D05	MBTPS1_2	128	16	84150004	544	CG	14	1188	0.0117845
P11D05	MBTPS1_2	144	16	84149988	560	CG	5	1186	0.00421585
P11D05	MBTPS1_2	147	16	84149985	563	CG	21	1185	0.0177215
P11D05	MBTPS1_2	165	16	84149967	581	CG	4	965	0.00414508
P11D05	MBTPS2_	30	X	21857660	5	CG	1	842	0.00118765
P11D05	MBTPS2_	41	X	21857649	-6	CG	6	963	0.00623053
P11D05	MBTPS2_	57	X	21857633	-22	CG	36	1070	0.0336449
P11D05	MBTPS2_	61	X	21857629	-26	CG	43	1074	0.0400372
P11D05	MBTPS2_	65	X	21857625	-30	CG	19	1073	0.0177074
P11D05	MBTPS2_	69	X	21857621	-34	CG	27	1073	0.0251631
P11D05	MBTPS2_	75	X	21857615	-40	CG	20	1074	0.018622
P11D05	MBTPS2_	91	X	21857599	-56	CG	15	1073	0.0139795
P11D05	MBTPS2_	97	X	21857593	-62	CG	3	1073	0.0027959
P11D05	MBTPS2_	115	X	21857575	-80	CG	19	1073	0.0177074
P11D05	MBTPS2_	160	X	21857530	-125	CG	15	837	0.0179211
P11D05	MYLIP_1	36	6	16129080	-236	CG	2	153	0.0130719
P11D05	MYLIP_1	46	6	16129070	-246	CG	1	155	0.00645161
P11D05	MYLIP_1	53	6	16129063	-253	CG	1	155	0.00645161
P11D05	MYLIP_1	56	6	16129060	-256	CG	1	155	0.00645161
P11D05	MYLIP_1	72	6	16129044	-272	CG	1	162	0.00617284
P11D05	MYLIP_1	76	6	16129040	-276	CG	0	169	0
P11D05	MYLIP_1	80	6	16129036	-280	CG	2	169	0.0118343
P11D05	MYLIP_1	92	6	16129024	-292	CG	2	169	0.0118343
P11D05	MYLIP_1	98	6	16129018	-298	CG	0	169	0
P11D05	MYLIP_1	109	6	16129007	-309	CG	1	167	0.00598802
P11D05	MYLIP_1	114	6	16129002	-314	CG	1	167	0.00598802
P11D05	MYLIP_1	122	6	16128994	-322	CG	1	166	0.0060241
P11D05	MYLIP_1	182	6	16128934	-382	CG	1	153	0.00653595
P11D05	MYLIP_1	189	6	16128927	-389	CG	0	152	0
P11D05	MYLIP_2	25	6	16129870	554	CG	0	16	0
P11D05	MYLIP_2	29	6	16129874	558	CG	0	16	0
P11D05	MYLIP_2	36	6	16129881	565	CG	0	16	0
P11D05	MYLIP_2	42	6	16129887	571	CG	0	16	0
P11D05	MYLIP_2	59	6	16129904	588	CG	0	18	0
P11D05	MYLIP_2	91	6	16129936	620	CG	0	18	0
P11D05	MYLIP_2	101	6	16129946	630	CG	0	20	0
P11D05	MYLIP_2	107	6	16129952	636	CG	0	21	0
P11D05	MYLIP_2	118	6	16129963	647	CG	0	21	0
P11D05	MYLIP_2	130	6	16129975	659	CG	0	22	0
P11D05	MYLIP_2	138	6	16129983	667	CG	0	22	0
P11D05	MYLIP_2	145	6	16129990	674	CG	0	23	0
P11D05	MYLIP_2	153	6	16129998	682	CG	0	21	0
P11D05	MYLIP_2	155	6	16130000	684	CG	0	20	0
P11D05	MYLIP_2	158	6	16130003	687	CG	0	19	0
P11D05	MYLIP_2	175	6	16130020	704	CG	0	19	0
P11D05	MYLIP_2	177	6	16130022	706	CG	0	19	0
P11D05	NPC1L1_	74	7	44582788	-1874	CG	344	389	0.884319
P11D05	NPC1L1_	79	7	44582783	-1869	CG	332	389	0.85347
P11D05	NPC1L1_	96	7	44582766	-1852	CG	399	423	0.943262
P11D05	NPC1L1_	116	7	44582746	-1832	CG	407	425	0.957647
P11D05	NPC1L1_	142	7	44582720	-1806	CG	405	421	0.961995
P11D05	NPC1L1_	147	7	44582715	-1801	CG	383	413	0.927361
P11D05	NPC1L1_	157	7	44582705	-1791	CG	374	382	0.979058
P11D05	NPC1L1_	170	7	44582692	-1778	CG	365	382	0.955497
P11D05	NUMB_	25	14	73924991	295	CG	14	2738	0.00511322
P11D05	NUMB_	36	14	73924980	306	CG	26	2730	0.00952381
P11D05	NUMB_	52	14	73924964	322	CG	44	3542	0.0124224
P11D05	NUMB_	56	14	73924960	326	CG	94	3687	0.025495
P11D05	NUMB_	62	14	73924954	332	CG	82	3801	0.0215733
P11D05	NUMB_	64	14	73924952	334	CG	79	3806	0.0207567
P11D05	NUMB_	66	14	73924950	336	CG	101	3806	0.026537
P11D05	NUMB_	93	14	73924923	363	CG	44	3813	0.0115395
P11D05	NUMB_	106	14	73924910	376	CG	41	3813	0.0107527
P11D05	NUMB_	114	14	73924902	384	CG	39	3805	0.0102497
P11D05	NUMB_	116	14	73924900	386	CG	50	3806	0.0131372
P11D05	NUMB_	123	14	73924893	393	CG	33	3805	0.0086728
P11D05	NUMB_	126	14	73924890	396	CG	39	3806	0.010247
P11D05	NUMB_	160	14	73924856	430	CG	8	2735	0.00292505
P11D05	NUMB_	166	14	73924850	436	CG	33	2736	0.0120614
P11D05	PCSK9_1	39	1	55505386	238	CG	87	1492	0.058311
P11D05	PCSK9_1	41	1	55505384	236	CG	52	1492	0.0348525
P11D05	PCSK9_1	51	1	55505374	226	CG	43	1492	0.0288204
P11D05	PCSK9_1	53	1	55505372	224	CG	56	1492	0.0375335
P11D05	PCSK9_1	55	1	55505370	222	CG	176	1492	0.117962
P11D05	PCSK9_1	81	1	55505344	196	CG	37	1489	0.0248489
P11D05	PCSK9_1	92	1	55505333	185	CG	19	1681	0.0113028
P11D05	PCSK9_1	95	1	55505330	182	CG	22	1688	0.0130332
P11D05	PCSK9_1	97	1	55505328	180	CG	17	1688	0.0100711
P11D05	PCSK9_1	102	1	55505323	175	CG	23	1693	0.0135854
P11D05	PCSK9_1	107	1	55505318	170	CG	53	1694	0.0312869
P11D05	PCSK9_1	111	1	55505314	166	CG	31	1695	0.0182891
P11D05	PCSK9_1	164	1	55505261	113	CG	49	1500	0.0326667
P11D05	PCSK9_1	167	1	55505258	110	CG	67	1509	0.0444003
P11D05	PCSK9_1	170	1	55505255	107	CG	73	1509	0.0483764
P11D05	PCSK9_1	174	1	55505251	103	CG	127	1509	0.0841617
P11D05	PCSK9_1	190	1	55505235	87	CG	60	1507	0.0398142
P11D05	PCSK9_1	195	1	55505230	82	CG	47	1507	0.0311878
P11D05	PCSK9_1	198	1	55505227	79	CG	47	1507	0.0311878
P11D05	PCSK9_1	201	1	55505224	76	CG	71	1507	0.0471135
P11D05	PCSK9_1	206	1	55505219	71	CG	181	1505	0.120266
P11D05	PCSK9_2	28	1	55505679	531	CG	22	1593	0.0138104
P11D05	PCSK9_2	37	1	55505670	522	CG	83	1592	0.0521357
P11D05	PCSK9_2	46	1	55505661	513	CG	36	1592	0.0226131
P11D05	PCSK9_2	55	1	55505652	504	CG	92	1503	0.0612109
P11D05	PCSK9_2	60	1	55505647	499	CG	176	1610	0.109317
P11D05	PCSK9_2	82	1	55505625	477	CG	103	1998	0.0515516
P11D05	PCSK9_2	88	1	55505619	471	CG	114	2008	0.0567729
P11D05	PCSK9_2	91	1	55505616	468	CG	101	2008	0.0502988
P11D05	PCSK9_2	97	1	55505610	462	CG	73	2000	0.0365
P11D05	PCSK9_2	107	1	55505600	452	CG	157	2006	0.0782652
P11D05	PCSK9_2	111	1	55505596	448	CG	36	2005	0.0179551
P11D05	PCSK9_2	115	1	55505592	444	CG	102	1999	0.0510255
P11D05	PCSK9_2	119	1	55505588	440	CG	68	2001	0.033983
P11D05	PCSK9_2	121	1	55505586	438	CG	58	2001	0.0289855
P11D05	PCSK9_2	161	1	55505546	398	CG	51	1591	0.0320553
P11D05	PCSK9_2	174	1	55505533	385	CG	83	1591	0.0521684
P11D05	PCSK9_2	187	1	55505520	372	CG	37	1591	0.0232558
P11D05	RNF139_	45	8	125486843	-164	CG	20	1694	0.0118064
P11D05	RNF139_	55	8	125486833	-174	CG	13	1694	0.00767414
P11D05	RNF139_	60	8	125486828	-179	CG	15	1696	0.00884434
P11D05	RNF139_	66	8	125486822	-185	CG	9	1693	0.00531601
P11D05	RNF139_	73	8	125486815	-192	CG	6	1681	0.0035693
P11D05	RNF139_	80	8	125486808	-199	CG	10	1693	0.00590667
P11D05	RNF139_	82	8	125486806	-201	CG	9	1696	0.0053066
P11D05	RNF139_	89	8	125486799	-208	CG	10	1747	0.0057241
P11D05	RNF139_	92	8	125486796	-211	CG	10	1754	0.00570125
P11D05	RNF139_	115	8	125486773	-234	CG	15	1768	0.00848416
P11D05	RNF139_	123	8	125486765	-242	CG	7	1771	0.00395257
P11D05	RNF139_	131	8	125486757	-250	CG	11	1771	0.00621118
P11D05	RNF139_	135	8	125486753	-254	CG	3	1771	0.00169396
P11D05	RNF139_	140	8	125486748	-259	CG	4	1771	0.00225861
P11D05	RNF139_	149	8	125486739	-268	CG	15	1764	0.0085034
P11D05	RNF139_	151	8	125486737	-270	CG	12	1757	0.00682982
P11D05	RNF139_	169	8	125486719	-288	CG	8	1690	0.00473373
P11D05	RNF139_	191	8	125486697	-310	CG	10	1690	0.00591716
P11D05	SCAP_	33	3	47517159	290	CG	0	8	0
P11D05	SCAP_	37	3	47517155	294	CG	0	8	0
P11D05	SCAP_	42	3	47517150	299	CG	1	8	0.125
P11D05	SCAP_	55	3	47517137	312	CG	0	7	0
P11D05	SCAP_	62	3	47517130	319	CG	0	7	0
P11D05	SCAP_	79	3	47517113	336	CG	0	8	0
P11D05	SCAP_	81	3	47517111	338	CG	0	8	0
P11D05	SCAP_	83	3	47517109	340	CG	0	8	0
P11D05	SCAP_	100	3	47517092	357	CG	1	19	0.0526316
P11D05	SCAP_	104	3	47517088	361	CG	0	17	0
P11D05	SCAP_	117	3	47517075	374	CG	1	24	0.0416667
P11D05	SCAP_	121	3	47517071	378	CG	0	25	0
P11D05	SCAP_	136	3	47517056	393	CG	0	17	0
P11D05	SCAP_	138	3	47517054	395	CG	0	17	0
P11D05	SCAP_	155	3	47517037	412	CG	0	8	0
P11D05	SCAP_	157	3	47517035	414	CG	0	10	0
P11D05	SCAP_	173	3	47517019	430	CG	1	7	0.142857
P11D05	SCAP_	185	3	47517007	442	CG	0	7	0
P11D05	SCAP_	187	3	47517005	444	CG	0	8	0
P11D05	SCAP_	190	3	47517002	447	CG	0	8	0
P11D05	SCAP_	193	3	47516999	450	CG	0	8	0
P11D05	SCAP_	216	3	47516976	473	CG	0	7	0
P11D05	SCYL3_	28	1	169862604	496	CG	0	19	0
P11D05	SCYL3_	33	1	169862599	501	CG	0	19	0
P11D05	SCYL3_	39	1	169862593	507	CG	0	19	0
P11D05	SCYL3_	42	1	169862590	510	CG	0	19	0
P11D05	SCYL3_	47	1	169862585	515	CG/rs998991	0	19	0
P11D05	SCYL3_	64	1	169862568	532	CG	0	19	0
P11D05	SCYL3_	66	1	169862566	534	CG	0	19	0
P11D05	SCYL3_	72	1	169862560	540	CG	0	19	0
P11D05	SCYL3_	74	1	169862558	542	CG	1	19	0.0526316
P11D05	SCYL3_	86	1	169862546	554	CG	0	19	0
P11D05	SCYL3_	96	1	169862536	564	CG	1	30	0.0333333
P11D05	SCYL3_	104	1	169862528	572	CG	1	37	0.027027
P11D05	SCYL3_	117	1	169862515	585	CG	2	42	0.047619
P11D05	SCYL3_	122	1	169862510	590	CG	3	43	0.0697674
P11D05	SCYL3_	132	1	169862500	600	CG	1	44	0.0227273
P11D05	SCYL3_	138	1	169862494	606	CG	0	42	0
P11D05	SCYL3_	155	1	169862477	623	CG	1	24	0.0416667
P11D05	SCYL3_	157	1	169862475	625	CG	0	25	0
P11D05	SCYL3_	161	1	169862471	629	CG	2	25	0.08
P11D05	SCYL3_	167	1	169862465	635	CG	0	22	0
P11D05	SCYL3_	175	1	169862457	643	CG	0	22	0
P11D05	SCYL3_	205	1	169862427	673	CG	1	703	0.00142248
P11D05	SOAT1_1	32	1	179262824	-24	CG	6	1914	0.0031348
P11D05	SOAT1_1	44	1	179262812	-36	CG	22	1895	0.0116095
P11D05	SOAT1_1	54	1	179262802	-46	CG	3	1701	0.00176367
P11D05	SOAT1_1	58	1	179262798	-50	CG	15	1914	0.00783699
P11D05	SOAT1_1	60	1	179262796	-52	CG	13	1917	0.00678143
P11D05	SOAT1_1	62	1	179262794	-54	CG	2	1917	0.0010433
P11D05	SOAT1_1	70	1	179262786	-62	CG	7	1911	0.003663
P11D05	SOAT1_1	73	1	179262783	-65	CG	3	1918	0.00156413
P11D05	SOAT1_1	83	1	179262773	-75	CG	18	1918	0.00938478
P11D05	SOAT1_1	124	1	179262732	-116	CG	33	2126	0.0155221
P11D05	SOAT1_1	139	1	179262717	-131	CG	3	2129	0.00140911
P11D05	SOAT1_1	142	1	179262714	-134	CG	21	2129	0.00986379
P11D05	SOAT1_1	195	1	179262661	-187	CG	2	1916	0.00104384
P11D05	SOAT1_1	203	1	179262653	-195	CG	25	1916	0.013048
P11D05	SOAT1_1	222	1	179262634	-214	CG	7	1916	0.00365344
P11D05	SOAT1_1	227	1	179262629	-219	CG	11	1916	0.00574113
P11D05	SOAT1_2	61	1	179263960	1112	CG	410	1886	0.217391
P11D05	SOAT1_2	63	1	179263958	1110	CG	122	1948	0.0626283
P11D05	SOAT1_2	73	1	179263948	1100	CG	372	2048	0.181641
P11D05	SOAT1_2	101	1	179263920	1072	CG	118	4390	0.0268793
P11D05	SOAT1_2	106	1	179263915	1067	CG	643	4299	0.14957
P11D05	SOAT1_2	110	1	179263911	1063	CG	502	4271	0.117537
P11D05	SOAT1_2	165	1	179263856	1008	CG	823	2824	0.291431
P11D05	SOAT1_2	197	1	179263824	976	CG	713	3024	0.23578
P11D05	SOAT1_2	205	1	179263816	968	CG	552	3075	0.179512
P11D05	SOAT1_2	209	1	179263812	964	CG	556	3008	0.18484
P11D05	SREBF1_1	19	17	17727072	13253	CG	37	987	0.0374873
P11D05	SREBF1_1	21	17	17727074	13251	CG	14	987	0.0141844
P11D05	SREBF1_1	23	17	17727076	13249	CG	16	991	0.0161453
P11D05	SREBF1_1	25	17	17727078	13247	CG	5	982	0.00509165
P11D05	SREBF1_1	36	17	17727089	13236	CG	3	994	0.00301811
P11D05	SREBF1_1	40	17	17727093	13232	CG	15	1035	0.0144928
P11D05	SREBF1_1	42	17	17727095	13230	CG	6	1040	0.00576923
P11D05	SREBF1_1	48	17	17727101	13224	CG	10	1228	0.00814332
P11D05	SREBF1_1	53	17	17727106	13219	CG	8	1264	0.00632911
P11D05	SREBF1_1	63	17	17727116	13209	CG	34	1276	0.0266458
P11D05	SREBF1_1	69	17	17727122	13203	CG	7	1277	0.0054816
P11D05	SREBF1_1	76	17	17727129	13196	CG	12	1272	0.00943396
P11D05	SREBF1_1	91	17	17727144	13181	CG	28	1276	0.0219436
P11D05	SREBF1_1	94	17	17727147	13178	CG	17	1275	0.0133333
P11D05	SREBF1_1	97	17	17727150	13175	CG	17	1274	0.0133438
P11D05	SREBF1_1	105	17	17727158	13167	CG	11	1275	0.00862745
P11D05	SREBF1_1	117	17	17727170	13155	CG	28	1271	0.0220299
P11D05	SREBF1_1	119	17	17727172	13153	CG	10	1276	0.00783699
P11D05	SREBF1_1	122	17	17727175	13150	CG	11	1276	0.00862069
P11D05	SREBF1_1	147	17	17727200	13125	CG	7	1271	0.00550747
P11D05	SREBF1_1	151	17	17727204	13121	CG	1	1262	0.000792393
P11D05	SREBF1_1	155	17	17727208	13117	CG	8	995	0.0080402
P11D05	SREBF1_1	166	17	17727219	13106	CG	20	993	0.020141
P11D05	SREBF1_1	170	17	17727223	13102	CG	17	993	0.0171198
P11D05	SREBF1_2_	29	17	17739525	800	CG	4	953	0.00419727
P11D05	SREBF1_2_	32	17	17739528	797	CG	9	953	0.00944386
P11D05	SREBF1_2_	39	17	17739535	790	CG	4	953	0.00419727
P11D05	SREBF1_2_	49	17	17739545	780	CG	2	952	0.00210084
P11D05	SREBF1_2_	54	17	17739550	775	CG	3	381	0.00787402
P11D05	SREBF1_2_	59	17	17739555	770	CG	1	375	0.00266667
P11D05	SREBF1_2_	70	17	17739566	759	CG	4	375	0.0106667
P11D05	SREBF1_2_	72	17	17739568	757	CG	0	377	0
P11D05	SREBF1_2_	80	17	17739576	749	CG	18	508	0.0354331
P11D05	SREBF1_2_	88	17	17739584	741	CG	19	526	0.0361217
P11D05	SREBF1_2_	94	17	17739590	735	CG	11	526	0.0209125
P11D05	SREBF1_2_	105	17	17739601	724	CG	3	526	0.00570342
P11D05	SREBF1_2_	108	17	17739604	721	CG	9	526	0.0171103
P11D05	SREBF1_2_	111	17	17739607	718	CG	11	526	0.0209125
P11D05	SREBF1_2_	124	17	17739620	705	CG	7	526	0.013308
P11D05	SREBF1_2_	129	17	17739625	700	CG	11	520	0.0211538
P11D05	SREBF1_2_	142	17	17739638	687	CG	6	520	0.0115385
P11D05	SREBF1_2_	154	17	17739650	675	CG	2	383	0.00522193
P11D05	SREBF1_2_	162	17	17739658	667	CG	3	375	0.008
P11D05	SREBF1_2_	167	17	17739663	662	CG	6	375	0.016
P11D05	SREBF1_2_	182	17	17739678	647	CG	6	378	0.015873
P11D05	SREBF1_2_	190	17	17739686	639	CG	3	378	0.00793651
P11D05	SREBF1_2_	193	17	17739689	636	CG	2	377	0.00530504
P11D05	SREBF1_2_	196	17	17739692	633	CG	2	380	0.00526316
P11D05	SREBF1_3_	28	17	17740267	58	CG	0	95	0
P11D05	SREBF1_3_	33	17	17740272	53	CG	0	143	0
P11D05	SREBF1_3_	36	17	17740275	50	CG	3	154	0.0194805
P11D05	SREBF1_3_	39	17	17740278	47	CG	0	159	0
P11D05	SREBF1_3_	42	17	17740281	44	CG/rs13306736	2	163	0.0122699
P11D05	SREBF1_3_	54	17	17740293	32	CG	3	166	0.0180723
P11D05	SREBF1_3_	71	17	17740310	15	CG	4	169	0.0236686
P11D05	SREBF1_3_	75	17	17740314	11	CG	5	166	0.0301205
P11D05	SREBF1_3_	90	17	17740329	-4	CG	4	171	0.0233918
P11D05	SREBF1_3_	94	17	17740333	-8	CG	5	171	0.0292398
P11D05	SREBF1_3_	99	17	17740338	-13	CG	7	171	0.0409357
P11D05	SREBF1_3_	105	17	17740344	-19	CG	3	169	0.0177515
P11D05	SREBF1_3_	115	17	17740354	-29	CG	0	166	0
P11D05	SREBF1_3_	126	17	17740365	-40	CG	2	168	0.0119048
P11D05	SREBF1_3_	142	17	17740381	-56	CG	1	168	0.00595238
P11D05	SREBF1_3_	148	17	17740387	-62	CG	2	176	0.0113636
P11D05	SREBF2_1	35	22	42228553	-529	CG	10	256	0.0390625
P11D05	SREBF2_1	69	22	42228587	-495	CG	4	256	0.015625
P11D05	SREBF2_1	75	22	42228593	-489	CG	6	256	0.0234375
P11D05	SREBF2_1	101	22	42228619	-463	CG	36	454	0.0792952
P11D05	SREBF2_1	117	22	42228635	-447	CG	11	455	0.0241758
P11D05	SREBF2_1	125	22	42228643	-439	CG	9	455	0.0197802
P11D05	SREBF2_1	130	22	42228648	-434	CG	10	455	0.021978
P11D05	SREBF2_1	134	22	42228652	-430	CG	27	455	0.0593407
P11D05	SREBF2_1	156	22	42228674	-408	CG	4	256	0.015625
P11D05	SREBF2_1	172	22	42228690	-392	CG	6	256	0.0234375
P11D05	SREBF2_1	181	22	42228699	-383	CG	6	256	0.0234375
P11D05	SREBF2_1	206	22	42228724	-358	CG	0	256	0
P11D05	SREBF2_2	45	22	42228811	-271	CG	0	813	0
P11D05	SREBF2_2	53	22	42228819	-263	CG	1	813	0.00123001
P11D05	SREBF2_2	60	22	42228826	-256	CG	4	814	0.004914
P11D05	SREBF2_2	71	22	42228837	-245	CG	1	814	0.0012285
P11D05	SREBF2_2	83	22	42228849	-233	CG	3	814	0.0036855
P11D05	SREBF2_2	101	22	42228867	-215	CG	7	813	0.00861009
P11D05	SREBF2_2	123	22	42228889	-193	CG	16	1071	0.0149393
P11D05	SREBF2_2	127	22	42228893	-189	CG	17	1071	0.015873
P11D05	SREBF2_2	144	22	42228910	-172	CG	4	1068	0.00374532
P11D05	SREBF2_2	149	22	42228915	-167	CG	4	1054	0.00379507
P11D05	SREBF2_2	155	22	42228921	-161	CG	32	813	0.0393604
P11D05	SREBF2_2	157	22	42228923	-159	CG	29	813	0.0356704
P11D05	SREBF2_2	197	22	42228963	-119	CG	3	813	0.00369004
P11D05	SREBF2_2	203	22	42228969	-113	CG	5	813	0.00615006
P11D05	SREBF2_2	205	22	42228971	-111	CG	5	813	0.00615006
P11D05	SREBF2_2	218	22	42228984	-98	CG	7	814	0.00859951
P11D05	SREBF2_2	223	22	42228989	-93	CG	10	814	0.012285
P11D05	SREBF2_2	228	22	42228994	-88	CG	7	813	0.00861009
P11D05	SREBF2_2	232	22	42228998	-84	CG	14	814	0.017199
P11D05	SREBF2_3	30	22	42230048	966	CG	75	742	0.101078
P11D05	SREBF2_3	42	22	42230036	954	CG	11	743	0.0148048
P11D05	SREBF2_3	48	22	42230030	948	CG	3	743	0.00403769
P11D05	SREBF2_3	94	22	42229984	902	CG	13	742	0.0175202
P11D05	SREBF2_3	108	22	42229970	888	CG	13	818	0.0158924
P11D05	SREBF2_3	112	22	42229966	884	CG	9	824	0.0109223
P11D05	SREBF2_3	125	22	42229953	871	CG	9	822	0.0109489
P11D05	SREBF2_3	146	22	42229932	850	CG	13	825	0.0157576
P11D05	SREBF2_3	149	22	42229929	847	CG	10	823	0.0121507
P11D05	SREBF2_3	187	22	42229891	809	CG	7	743	0.00942127
P11D05	SREBF2_3	202	22	42229876	794	CG	7	742	0.00943396
P11D05	SREBF2_3	204	22	42229874	792	CG	15	742	0.0202156
P11D05	SREBF2_3	213	22	42229865	783	CG	16	742	0.0215633
P11D05	SREBF2_3	216	22	42229862	780	CG	3	742	0.00404313
P11D05	SREBF2_3	225	22	42229853	771	CG	6	742	0.00808625
P11D05	SREBF2_3	228	22	42229850	768	CG	3	742	0.00404313
P11D05	TBL2_1_	37	7	72994558	-1545	CG	53	3932	0.0134791
P11D05	TBL2_1_	45	7	72994566	-1553	CG	1631	3937	0.414275
P11D05	TBL2_1_	47	7	72994568	-1555	CG	1470	3932	0.373856
P11D05	TBL2_1_	53	7	72994574	-1561	CG	1821	3969	0.458806
P11D05	TBL2_1_	70	7	72994591	-1578	CG	2075	4499	0.461214
P11D05	TBL2_1_	109	7	72994630	-1617	CG	1720	4513	0.381121
P11D05	TBL2_1_	129	7	72994650	-1637	CG	1943	4529	0.429013
P11D05	TBL2_1_	133	7	72994654	-1641	CG	1995	4530	0.440397
P11D05	TBL2_1_	141	7	72994662	-1649	CG	2194	4504	0.487123
P11D05	TBL2_1_	145	7	72994666	-1653	CG	1839	4517	0.407129
P11D05	TBL2_1_	178	7	72994699	-1686	CG	1844	3937	0.468377
P11D05	TBL2_2	33	7	72994429	-1416	CG	549	3937	0.139446
P11D05	TBL2_2	37	7	72994425	-1412	CG	440	3521	0.124964
P11D05	TBL2_2	44	7	72994418	-1405	CG	255	3232	0.0788985
P11D05	TBL2_2	81	7	72994381	-1368	CG	158	2882	0.054823
P11D05	TBL2_2	89	7	72994373	-1360	CG	787	2799	0.281172
P11D05	TBL2_2	118	7	72994344	-1331	CG	42	2840	0.0147887
P11D05	TBL2_2	131	7	72994331	-1318	CG	461	2831	0.16284
P11D05	TBL2_2	139	7	72994323	-1310	CG	27	5238	0.00515464
P11D05	TBL2_2	155	7	72994307	-1294	CG	521	4945	0.105359
P11D05	TBL2_2	172	7	72994290	-1277	CG	270	4204	0.0642245
P11D05	TBL2_2	177	7	72994285	-1272	CG	724	4151	0.174416
P11D05	TBL2_3	31	7	72992973	40	CG	3	776	0.00386598
P11D05	TBL2_3	40	7	72992964	49	CG	26	1020	0.0254902
P11D05	TBL2_3	42	7	72992962	51	CG	28	1035	0.0270531
P11D05	TBL2_3	48	7	72992956	57	CG	11	1071	0.0102708
P11D05	TBL2_3	50	7	72992954	59	CG	17	1073	0.0158434
P11D05	TBL2_3	54	7	72992950	63	CG	43	1072	0.0401119
P11D05	TBL2_3	58	7	72992946	67	CG	31	1066	0.0290807
P11D05	TBL2_3	60	7	72992944	69	CG	31	953	0.0325289
P11D05	TBL2_3	65	7	72992939	74	CG	20	1063	0.0188147
P11D05	TBL2_3	74	7	72992930	83	CG	29	1072	0.0270522
P11D05	TBL2_3	78	7	72992926	87	CG	27	1072	0.0251866
P11D05	TBL2_3	82	7	72992922	91	CG	17	1072	0.0158582
P11D05	TBL2_3	86	7	72992918	95	CG	10	1071	0.00933707
P11D05	TBL2_3	88	7	72992916	97	CG	19	1071	0.0177404
P11D05	TBL2_3	135	7	72992869	144	CG	7	1073	0.00652377
P11D05	TBL2_3	144	7	72992860	153	CG	4	1072	0.00373134
P11D05	TBL2_4	27	7	72992812	201	CG	0	2	0
P11D05	TBL2_4	30	7	72992809	204	CG	0	2	0
P11D05	TBL2_4	33	7	72992806	207	CG	2	2	1
P11D05	TBL2_4	36	7	72992803	210	CG	0	2	0
P11D05	TBL2_4	42	7	72992797	216	CG
P11D05	TBL2_4	44	7	72992795	218	CG
P11D05	TBL2_4	56	7	72992783	230	CG	0	1	0
P11D05	TBL2_4	58	7	72992781	232	CG	0	1	0
P11D05	TBL2_4	60	7	72992779	234	CG	0	1	0
P11D05	TBL2_4	76	7	72992763	250	CG	0	1	0
[truncated: 200,561+ more rows]

## Sheet: Methy. Table
Target	Position	Chr	GenomePosition	Distance2TSS	Type	P11C11	P11D05	P11D07	P11D08	P14A02	P14A08	P14A10	P14B08	P14B09	P14B11	P14B12	P14D07	P14F04	P14F11	P14G06	P14G10	P14G12	P14H02	P14H05	P14H08	P14H09	P15C09	P15E02	P15E03	P15E10	P15F02	P15F07	P15G02	P15G12	P17E08	P1A09	P1A11	P1B06	P1C01	P1C12	P1D10	P1E02	P1E03	P1H09	P20B05	P20D12	P20E07	P20F04	P20F05
AMFR_1_	37	16	56459026	424	CG	0.00327511	0.00791855	0.0123267	0.00396825	0.00931677	0.0117057	0.00517464	0.0150754	0.00451977	0.0108565	0.00914286	0.00706357	0.0153061	0.001321	0.00356295	0.00603136	0.00578704	0.0153322	0.00421941	0.0112641	0.0176565	0.0120069	0.00894855	0.0158501	0.0128458	0.00798176	0.0077951	0.0125336	0.00549451	0.0116773	0.00628931	0.00410397	0.00337838	0.0155556	0.0012837	0.00664011	0.00585652	0.0075188	0.00870647	0.00305499	0.00765306	0.00928505	0.0139027	0.0135417
AMFR_1_	39	16	56459028	422	CG	0.0075431	0.00337079	0.00459418	0.0078329	0.00408998	0.00165837	0.00383142	0.00660066	0.0122905	0.00358852	0.00335196	0.0049554	0.00708502	0.00263505	0.00935673	0.00603136	0.0114811	0.00338409	0.00139082	0.00870647	0.00318979	0.00510204	0.00220264	0.0113154	0.00684932	0.00453515	0.00440529	0.00442087	0.00434783	0.00843882	0.00775194	0.00134228	0.00505051	0.00220264	0.00628141	0.00784314	0.00291121	0.00741656	0.00982801	0.00705645	0.00633714	0.00826446	0.0088845	0.00514933
AMFR_1_	45	16	56459034	416	CG	0.0118026	0.0224215	0.0121951	0.0169713	0.00915565	0.0299003	0.0191083	0.00495868	0.0100559	0.0143541	0.027933	0.0098912	0.010101	0.00527704	0.0105018	0.015625	0.00688863	0.0185811	0.0208623	0.0136476	0.0158983	0.0178723	0.00877193	0.0155148	0.0194932	0.0158371	0.00879121	0.0167993	0.0303359	0.0188877	0.0138889	0.0120805	0.0250836	0.0231023	0.0037594	0.00521512	0.00582242	0.0110701	0.0208078	0.0100705	0.00758534	0.0146789	0.0177515	0.0174717
AMFR_1_	55	16	56459044	406	CG	0.00967742	0.00673401	0.0138037	0.0131752	0.0237358	0.0250836	0.00769231	0.026534	0.00673401	0.00842359	0.0112108	0.00796813	0.0142857	0.0172414	0.0151692	0.0193004	0.0116009	0.00511073	0.00837989	0.0137328	0.00636943	0.0205656	0.01766	0.0338983	0.0234375	0.0306818	0.0154355	0.0195556	0.0185996	0.0137131	0.00930233	0.0228802	0.026936	0.00446429	0.0301887	0.00394737	0.00291971	0.0124069	0.0135635	0.0183113	0.00382166	0.0128795	0.00892857	0.010352
AMFR_1_	58	16	56459047	403	CG	0.00963597	0.00560538	0.00609756	0.00391645	0.00612245	0.0066335	0.0127065	0.00826446	0.00782123	0.00479042	0.0122494	0.00890208	0.0141271	0.00527009	0.0104408	0.00480769	0.00688863	0.00506757	0.00138889	0.00618047	0	0.00424088	0.010989	0.00701262	0.0146056	0.0124294	0.00547645	0.00884173	0.0032538	0.0104603	0.0107692	0.00669344	0.00167504	0.0319032	0.0075188	0.00391134	0.00725689	0.00982801	0.002442	0.0171371	0.00757576	0.0073193	0.0117994	0.0102459
AMFR_1_	62	16	56459051	399	CG	0.0107066	0.0100897	0.0137615	0.0104302	0.00918367	0.0165563	0.0114504	0.0182119	0.0301003	0.0155689	0.0100223	0.013834	0.0181452	0.0131752	0.00813008	0.0240385	0.0103448	0.00675676	0.0139082	0.0111386	0.0111288	0.0169635	0.0175824	0.0140647	0.00878049	0.020362	0.0175439	0.0132626	0.00325027	0.0210084	0.0108527	0.00267738	0.00503356	0.0187019	0.0075188	0.00521512	0.00145138	0.0159705	0.00732601	0.00302725	0.0176991	0.0137363	0.00394477	0.00922131
AMFR_1_	66	16	56459055	395	CG	0.0150538	0.00336323	0.0137405	0.0143603	0.0224719	0.0315091	0.0203562	0.0066335	0.019037	0.0239808	0.0189732	0.00792079	0.0292339	0.00659631	0.0220674	0.0168067	0.0264368	0.0170068	0.0237099	0.0186567	0.00796178	0.00677966	0.0328947	0.00984529	0.0194932	0.0225734	0.0165017	0.0132509	0.0162866	0.0125786	0.0262346	0.0214477	0.0419463	0.00330033	0.0112923	0.0301442	0.0261628	0.0110565	0.00732601	0.0313131	0.0126422	0.0210238	0.0314342	0.016444
AMFR_1_	70	16	56459059	391	CG	0.00645161	0.00336323	0.00764526	0.00913838	0.00715746	0.0149254	0.00381679	0.00497512	0.0111732	0.00839329	0.00782123	0.00891089	0.0151515	0.00527704	0.00232288	0.00480192	0.0103448	0.00677966	0.00979021	0.00871731	0.00318471	0.000848176	0.00879121	0.0112835	0.00683594	0.00564334	0.00879121	0.00441696	0.00542299	0.00209644	0	0.00402145	0.0167504	0.00220022	0.00628141	0.0013089	0.0101744	0.00490798	0.004884	0.0121212	0.0113636	0.00822669	0.0019685	0.00410256
AMFR_1_	74	16	56459063	387	CG	0.00969828	0.00678733	0.00461538	0.00915033	0.00412797	0.00833333	0.00256082	0.0033389	0.00449438	0.00481928	0.00791855	0.00100301	0.0131712	0.00265604	0.00821596	0.00719424	0.00115207	0.00513699	0.00561798	0.00626566	0.00641026	0.00343053	0.00894855	0.0115108	0.00687623	0.00681044	0.00553097	0.00982143	0.00437158	0.00739958	0.0140187	0.00815217	0.00504202	0.00444939	0.00760456	0	0.00585652	0.00494438	0.0110429	0.00611621	0.00633714	0.00736648	0.0109127	0.0041365
AMFR_1_	77	16	56459066	384	CG	0.00863931	0.010181	0.0015361	0.00915033	0.00829876	0.00657895	0.00898588	0.0100167	0.00902935	0.00845411	0.0136519	0.0100402	0.0182927	0.00661376	0.0116822	0.0143369	0.00578704	0.00340716	0.0112676	0.0100376	0.014377	0.00426621	0.0112867	0.0143678	0.00587084	0.00677201	0.0133038	0.00624442	0.00545256	0.00422833	0.00466563	0.00945946	0.00672269	0.00773481	0.0165605	0.00393701	0.0058651	0.00990099	0.00244499	0.0193286	0.0126904	0.0174312	0	0.011399
AMFR_1_	80	16	56459069	381	CG	0.0171017	0.0117012	0.0281863	0.0168244	0.0179181	0.0209974	0.0216718	0.0216802	0.0145322	0.013712	0.0235507	0.0185634	0.0230708	0.0191286	0.0177736	0.0211538	0.0139665	0.018617	0.00892857	0.0188492	0.0205128	0.0121869	0.0191304	0.0216155	0.0135243	0.0169643	0.015873	0.0149573	0.0142096	0.0206897	0.0157959	0.0249458	0.0279255	0.0305481	0.0242915	0.0140845	0.0172216	0.0243408	0.0218688	0.0195599	0.021978	0.0151954	0.0219092	0.0185654
AMFR_1_	95	16	56459084	366	CG	0.0243493	0.0175439	0.0239453	0.0340265	0.0149489	0.0156062	0.0115274	0.0240811	0.0192469	0.0172414	0.0269134	0.0208024	0.0191599	0.0128205	0.0218531	0.0292035	0.0240964	0.0182927	0.0288363	0.0183318	0.0210526	0.0210657	0.0180624	0.0179325	0.0191176	0.0252855	0.016247	0.0258621	0.0213465	0.0236035	0.0327314	0.0218471	0.0222222	0.0182119	0.0223048	0.0140845	0.0203426	0.0149115	0.0239631	0.028636	0.0302198	0.0149153	0.0229062	0.0260252
AMFR_1_	101	16	56459090	360	CG	0.0151261	0.0167084	0.022805	0.0208333	0.0188828	0.0288115	0.0182342	0.0228137	0.0192147	0.0154265	0.019344	0.0156134	0.0265291	0.0266535	0.0192476	0.0185841	0.020654	0.013431	0.0185376	0.0220386	0.0269637	0.0216987	0.0213465	0.0305907	0.0220588	0.0269168	0.0292445	0.0205434	0.0221675	0.0165224	0.0282167	0.0129225	0.0135802	0.0165837	0.0186047	0.0311871	0.0224599	0.0269517	0.0202392	0.0263952	0.0229358	0.0264407	0.0136201	0.0228887
AMFR_1_	113	16	56459102	348	CG	0.0143098	0.0191987	0.0136519	0.0189215	0.0118017	0.0264106	0.00860421	0.00758534	0.0108605	0.00724638	0.0159798	0.00594796	0.0199409	0.0187562	0.020979	0.00706714	0.0154905	0.0158537	0.0123711	0.0137615	0.0187354	0.00868486	0.00986842	0.0158395	0.0117647	0.00980392	0.011336	0.0132538	0.00575185	0.0149254	0.0124014	0.0168651	0.0173267	0.014913	0.0111214	0.00804829	0.0288462	0.0130233	0.0119485	0.00906344	0.0211009	0.0128552	0.0114531	0.0126283
AMFR_1_	118	16	56459107	343	CG	0.00671704	0.0167084	0.0250284	0.0132576	0.0125885	0.0132212	0.0172249	0.00760456	0.0267335	0.0118074	0.0151771	0.0104012	0.0206948	0.0108481	0.0166375	0.020372	0.0163934	0.00979192	0.0134021	0.00914913	0.00937866	0.0210787	0.0229885	0.0126984	0.013245	0.0139002	0.011336	0.0159151	0.0164474	0.0125885	0.00903955	0.00497018	0.0198265	0.0149378	0.010223	0.0191726	0.0042735	0.0130597	0.00459982	0.0203466	0.015582	0.0115411	0.0121864	0.0126084
AMFR_1_	121	16	56459110	340	CG	0.0134454	0.0116861	0.0147895	0.0179754	0.0133753	0.0132371	0.0076555	0.0214918	0.0233918	0.00634058	0.0151643	0.0156134	0.0169492	0.0117994	0.0148731	0.00974314	0.0137812	0.00731707	0.0113169	0.0164684	0.014068	0.00558659	0.0164204	0.0137276	0.0147167	0.0237316	0.0113269	0.0145889	0.0188525	0.0141621	0.0101695	0.00894632	0.0111386	0.0107616	0.00834879	0.0120968	0.0224599	0.0214352	0.0165441	0.0188395	0.0155963	0.0203114	0.009319	0.00866824
AMFR_1_	127	16	56459116	334	CG	0.0184874	0.021721	0.0147895	0.00662252	0.00786782	0.0132212	0.0181992	0.0164349	0.00668896	0.0181324	0.0151771	0.0141264	0.0191599	0.0167158	0.0166521	0.0123894	0.0180879	0.0170732	0.0123457	0.0128088	0.0199531	0.0117939	0.0164474	0.021164	0.0191176	0.020475	0.0161681	0.0132714	0.0155738	0.0141732	0.0180791	0.00893744	0.0123762	0.0281457	0.0148699	0.0130916	0.0106952	0.0205033	0.0119485	0.0120846	0.00824931	0.0115098	0.0114695	0.0157729
AMFR_1_	133	16	56459122	328	CG	0.0058873	0.0100251	0.0125428	0.011396	0.00551615	0.0120337	0.00862895	0.00632111	0.0083612	0.00362976	0.0126476	0.00520446	0.00884304	0.00787402	0.00437828	0.00972591	0.00430293	0.0121951	0.00720165	0.00641613	0.0117096	0.00435323	0.00328947	0.00954401	0.00883652	0.0188834	0.0048583	0.00331565	0.0262726	0.00787402	0.00566251	0.0119403	0.00742574	0.0190555	0.00834879	0.00704935	0.00106952	0.0121043	0.00918274	0.00605144	0.00641613	0.00473934	0.00573066	0.011041
AMFR_1_	146	16	56459135	315	CG	0.00506329	0.00672269	0.0125714	0.00856327	0.0134387	0.0108434	0.00870406	0.00508259	0.0159664	0.00818926	0.0126796	0.00671642	0.0170244	0.0187008	0.00702988	0.013369	0.0146932	0.0110429	0.00825593	0.0137994	0.00587544	0.0193508	0.00993377	0.010627	0.0110538	0.0090535	0.00814332	0.00665336	0.00246914	0.015873	0.0228833	0.010978	0.00746269	0.00499168	0.0150094	0.012109	0.011879	0.0158879	0.0156827	0.0113636	0.0147059	0.00951734	0.0107759	0.00793651
AMFR_1_	148	16	56459137	313	CG	0.00676819	0.0118644	0.0103211	0.00763359	0.00555115	0.00483092	0.0106796	0.0127551	0.0127011	0.0127971	0.0144435	0.00975244	0.00593472	0.0148221	0.0114841	0.00896057	0.00865801	0.0110974	0.0113872	0.00924214	0.00707547	0.010665	0.0066335	0.0106838	0.0118343	0.0115702	0.0179739	0.0133869	0.0115416	0.0128	0.0126147	0.012012	0.00747198	0.00834028	0.0150801	0.0101729	0.00543478	0.0131455	0.0102326	0.0197869	0.0129032	0.00818554	0.0122478	0.0103503
AMFR_1_	150	16	56459139	311	CG	0.00514139	0.0129646	0.00926999	0.00387222	0.0088141	0.0110429	0.00990099	0.0143229	0.00599829	0.00369004	0.00429553	0.00916031	0.00525526	0.00601202	0.00714924	0.00821918	0.00616197	0.0125786	0.00630252	0.0104068	0.00958084	0.00382166	0.00670017	0.0131291	0.00523952	0.0033557	0.011599	0.00613079	0.0117253	0.0048583	0.0152225	0.0102249	0.00636943	0.00844595	0.0181992	0.00618557	0.0143172	0.0105263	0.0084666	0.0100309	0.00467727	0.00623701	0.0117216	0.00564516
AMFR_1_	157	16	56459146	304	CG	0.00657895	0.00909091	0.0154321	0.0171958	0.012513	0.0150502	0.00647668	0.00676819	0.0170068	0.0206311	0.023015	0.0202634	0.0216272	0.010568	0.00832342	0.0157195	0.0104408	0.00857633	0.0155148	0.0101138	0.00803859	0.00948276	0.00456621	0.0204082	0.0118694	0.00688073	0.0123318	0.0117117	0.00661521	0.0138889	0.00633914	0.0136986	0.00851789	0.00671141	0.0180645	0.012016	0.0117474	0.0125471	0.0086741	0.00922131	0.00766284	0.0140056	0.024975	0.0115304
AMFR_1_	187	16	56459176	274	CG	0.0120746	0.0125	0.0139319	0.00661376	0.00417101	0.00670017	0.011658	0.00676819	0.00684151	0.00728155	0.0230415	0.0172414	0.00721649	0.00395778	0.0214286	0.0133011	0.0116144	0.0137457	0.0183616	0.0139594	0.0112721	0.0103627	0.0205479	0.0116448	0.0198216	0.0149425	0.011236	0.0207207	0.0253863	0.0149413	0.0111288	0.00820793	0.0358362	0.00668151	0.0116279	0.0040107	0.00294551	0.0188442	0.0223325	0.0112474	0.016624	0.0149533	0.014014	0.0104932
AMFR_1_	197	16	56459186	264	CG	0.00989011	0.0125	0.00309598	0.00925926	0.0104275	0.00670017	0.00388601	0.00338983	0.00569476	0.00486027	0.0138249	0.0141988	0.014433	0.00792602	0.00952381	0.0108827	0.00698487	0.0120275	0.00564972	0.00507614	0.00805153	0.00518135	0.00913242	0.0160116	0.0119048	0.0114811	0.00898876	0.00990991	0.00441501	0.00747065	0.0238095	0.0109439	0.00853242	0.00668896	0.0141935	0.00935829	0.00588235	0.0100503	0.0148883	0.00511771	0.0128041	0.00747664	0.015015	0.00628931
AMFR_1_	207	16	56459196	254	CG	0.0222222	0.0146232	0.0130624	0.0200501	0.0140987	0.00332779	0.0167264	0.0066335	0.0077951	0.0118483	0.0166113	0.0226378	0.00810537	0.0104167	0.0119048	0.0188457	0.0236753	0.00333333	0.0164159	0.0266371	0.00158228	0.0136635	0.0177384	0.0152778	0.0096432	0.0155039	0.00770077	0.0211454	0.0130435	0.0167015	0.0194903	0.0174263	0.0131148	0.00775194	0.0298879	0.0131926	0.0175182	0.0122249	0.0152403	0.0100705	0.0136646	0.0201465	0.00988142	0.0193878
AMFR_2	27	16	56459217	233	CG	0	0.0666667	0	0	0		0	0	0	0.037037	0	0	0	0		0	0	0	0	0		0	0	0	0	0	0	0	0	0	0	0	0	0	0.05	0		0	0	0	0	0	0	0
AMFR_2	31	16	56459221	229	CG	0.0166667	0.0666667	0.0227273	0	0		0	0	0	0	0	0	0	0		0	0.0217391	0	0.0263158	0		0.047619	0	0	0	0	0	0	0	0	0	0	0	0	0	0		0	0	0	0	0	0	0
AMFR_2	44	16	56459234	216	CG	0	0	0	0	0		0	0	0	0	0	0	0			0	0	0	0.0333333	0.0344828		0	0	0	0	0	0	0	0	0	0	0	0		0	0		0	0	0		0	0	0
AMFR_2	52	16	56459242	208	CG	0	0	0.0333333	0	0		0	0	0.05	0	0	0.0344828	0			0.0263158	0	0	0.0333333	0		0	0	0	0	0	0	0.027027	0	0	0	0	0		0	0.0666667	0	0	0	0	0	0	0	0.0357143
AMFR_2	58	16	56459248	202	CG	0.0204082	0	0	0	0		0.0416667	0	0	0	0	0	0			0	0	0	0	0		0	0	0	0	0	0	0	0	0	0	0	0		0	0	0.1	0	0	0	0	0	0	0
AMFR_2	61	16	56459251	199	CG	0	0.0625	0	0	0		0	0	0	0.0526316	0	0	0			0	0	0	0	0		0	0	0	0	0	0	0.121951	0	0	0	0	0		0	0	0.1	0	0	0	0	0	0	0
AMFR_2	87	16	56459277	173	CG	0.0144928	0	0.0465116	0.0232558	0		0.0512821	0	0	0.0285714	0	0	0	0	0	0	0	0	0	0		0.0333333	0	0	0	0.0149254	0	0	0	0	0	0	0	0	0	0	0	0	0.0188679	0	0.0769231	0	0.03125	0
AMFR_2	92	16	56459282	168	CG	0	0.04	0	0	0.0338983		0	0.0416667	0	0	0.0151515	0.0444444	0	0	0.047619	0	0.02	0	0	0		0	0	0	0	0.0147059	0	0	0.0333333	0	0	0.03125	0	0	0	0	0	0.025641	0.0350877	0	0	0	0	0
AMFR_2	96	16	56459286	164	CG	0.0140845	0	0	0	0.0169492		0	0	0.0192308	0.0294118	0.0298507	0.0222222	0	0	0	0	0	0	0	0		0	0	0	0	0	0	0.0135135	0	0	0	0.03125	0.0666667	0	0.0277778	0	0	0	0	0	0	0	0	0
AMFR_2	106	16	56459296	154	CG	0.0147059	0	0	0.0217391	0		0	0	0	0	0	0	0	0	0	0	0	0	0.1	0		0	0	0	0	0.0140845	0	0	0.0322581	0	0	0	0	0	0	0	0	0	0	0	0	0	0	0
AMFR_2	109	16	56459299	151	CG	0.0144928	0	0.027027	0.0217391	0		0	0.0384615	0	0	0	0.0243902	0	0	0	0	0	0	0	0.0384615		0	0	0	0	0.0294118	0	0	0	0	0	0	0	0	0.030303	0	0.0526316	0.025641	0	0.05	0	0	0	0
AMFR_2	115	16	56459305	145	CG	0.0140845	0.0416667	0	0	0		0.03125	0	0	0	0	0.0434783	0.0384615	0	0	0.0344828	0	0	0.0454545	0		0.0294118	0	0	0.0625	0.0138889	0.03125	0.0128205	0	0	0	0	0	0	0	0	0	0	0	0	0	0	0	0
AMFR_2	117	16	56459307	143	CG	0	0	0	0	0		0	0	0	0	0	0	0	0	0	0	0	0	0	0		0	0	0.047619	0	0.0294118	0	0	0	0	0.0377358	0	0	0	0	0.037037	0	0.0243902	0.0178571	0	0	0.0285714	0	0
AMFR_2	121	16	56459311	139	CG	0.0142857	0	0	0	0		0	0	0	0	0.030303	0	0	0	0	0	0	0	0	0		0	0	0	0	0	0	0.0136986	0	0	0	0	0	0	0	0	0	0	0	0	0	0.0294118	0.0333333	0.0243902
AMFR_2	124	16	56459314	136	CG	0	0	0	0.0175439	0		0	0	0	0	0	0	0	0	0	0.016129	0	0	0	0		0.025641	0	0.0425532	0	0.0136986	0	0	0.0285714	0	0	0.03125	0	0	0	0.0333333	0.047619	0	0	0	0	0.0526316	0	0
AMFR_2	130	16	56459320	130	CG	0.0405405	0	0	0.0175439	0.0166667		0.0740741	0	0.0227273	0	0.0294118	0	0	0	0	0	0	0	0	0.0327869		0	0	0	0	0.0972222	0.0294118	0	0.0285714	0.0263158	0	0	0	0	0	0	0	0	0	0.0384615	0	0	0	0.0434783
AMFR_2	140	16	56459330	120	CG	0	0	0	0.016129	0		0	0	0	0.025	0	0.0175439	0	0	0	0	0.0298507	0	0.0172414	0		0	0	0	0	0.0266667	0	0.0107527	0	0.0212766	0.0138889	0	0	0	0	0	0	0	0	0.030303	0	0.0232558	0	0
AMFR_2	143	16	56459333	117	CG	0.0119048	0	0.0238095	0	0.0153846		0	0	0	0.0434783	0.012987	0.0188679	0	0	0	0	0	0	0.0175439	0		0	0	0	0.0227273	0.0133333	0.0465116	0.0107527	0	0.0208333	0.0142857	0	0	0	0	0	0	0	0	0	0.027027	0	0.0243902	0.0638298
AMFR_2	149	16	56459339	111	CG	0.0114943	0.037037	0	0.0151515	0.0428571	0	0	0	0.0333333	0	0.0487805	0.0350877	0.0571429	0.04	0	0.0133333	0.0147059	0	0.0327869	0		0.0181818	0	0	0.0416667	0.025	0.0204082	0.0531915	0.0555556	0	0.0405405	0.030303	0	0	0	0.0555556	0	0.0434783	0.0714286	0.027027	0	0	0.05	0.0196078
AMFR_2	155	16	56459345	105	CG	0.0481928	0	0.0487805	0.0298507	0.132353	0	0	0.0666667	0	0.0869565	0	0.0327869	0.0714286	0.0833333	0	0.0277778	0.0147059	0.0222222	0	0		0.0377358	0.0909091	0.0357143	0.0425532	0.0136986	0.0212766	0.03125	0	0	0.0405405	0.0571429	0	0.0277778	0.031746	0	0.0322581	0.0277778	0.0857143	0	0.0217391	0.06	0	0.0377358
AMFR_2	161	16	56459351	99	CG	0.0266667	0.0740741	0.0571429	0.0327869	0.0454545	0	0.0465116	0	0	0.025	0.04	0.0175439	0	0.0357143	0	0.0833333	0.0322581	0	0.0175439	0.0377358	0	0.0208333	0	0	0.0208333	0.030303	0.025	0.0352941	0	0.0512821	0.0555556	0	0	0	0.0357143	0	0	0.015625	0	0.03125	0.0238095	0.0408163	0.0277778	0.0392157
AMFR_2	164	16	56459354	96	CG	0	0.037037	0	0.0483871	0.015873	0	0.0238095	0	0	0	0.0273973	0.0357143	0	0	0	0	0.016129	0.0465116	0.0526316	0.0392157	0	0	0	0	0.0425532	0	0.025641	0.0117647	0	0	0	0.0606061	0	0	0.0169492	0.05	0.0322581	0.047619	0.016129	0.0882353	0	0.0784314	0	0.0625
AMFR_2	167	16	56459357	93	CG	0	0	0.0294118	0	0	0	0	0.03125	0.0163934	0	0.0555556	0	0.047619	0	0	0.0147059	0	0	0	0	0	0	0	0	0	0	0	0.0365854	0	0	0.0147059	0	0.210526	0	0.0169492	0	0	0.0153846	0.0350877	0	0.0238095	0.0188679	0	0.0208333
AMFR_2	170	16	56459360	90	CG	0.0142857	0	0	0.0363636	0.0178571	0	0.0222222	0	0	0	0.0140845	0.0175439	0.025641	0	0.025	0	0	0	0	0	0	0	0	0.0169492	0	0.0151515	0.0277778	0.037037	0.0294118	0.030303	0	0	0	0	0.0350877	0	0.0357143	0.015873	0.02	0	0	0	0.03125	0
AMFR_2	173	16	56459363	87	CG	0.0147059	0	0	0.0188679	0.0384615	0	0	0	0	0.0555556	0	0.0192308	0.0540541	0	0.027027	0.03125	0.0169492	0.0238095	0.0196078	0	0	0.0652174	0	0	0.025	0	0.0285714	0.0410959	0	0	0	0	0	0	0.0188679	0.0769231	0.04	0.0169492	0	0	0	0	0.0333333	0.0243902
AMFR_2	175	16	56459365	85	CG	0.0147059	0	0.0357143	0.0192308	0.0188679	0	0.0487805	0	0.0363636	0.027027	0	0	0.0277778	0.0384615	0	0.0151515	0.0178571	0	0	0.0444444	0	0	0	0.0175439	0.047619	0.031746	0	0	0.030303	0	0	0	0	0	0	0.027027	0	0	0	0	0	0.0222222	0.0666667	0
AMFR_2	178	16	56459368	82	CG	0	0	0	0.0208333	0	0	0	0.0384615	0.0188679	0.0285714	0.0655738	0	0.0294118	0	0	0	0	0	0.0232558	0	0	0	0	0.0384615	0	0.0172414	0	0.0151515	0.0333333	0.0322581	0	0	0	0	0.0217391	0	0.0434783	0.0192308	0.0232558	0	0.0344828	0	0	0
AMFR_2	183	16	56459373	77	CG	0	0.0434783	0	0	0		0	0.0416667	0	0.0384615	0	0	0	0	0.0357143	0.0192308	0	0	0.025641	0	0	0	0	0	0	0	0	0	0	0	0	0	0	0	0	0.0384615	0	0	0	0.0588235	0	0.03125	0.0555556	0
AMFR_2	188	16	56459378	72	CG	0.0181818	0.0434783	0	0	0		0	0	0	0	0	0.0487805	0	0.0454545	0	0.0192308	0.030303	0.037037	0	0	0	0	0	0	0	0	0	0.0232558	0	0	0	0	0.0909091	0	0.0333333	0	0	0	0	0	0	0.030303	0.05	0.0384615
AMFR_2	193	16	56459383	67	CG	0.037037	0	0	0	0		0.04	0	0	0	0.0217391	0	0	0	0.0555556	0	0	0.0454545	0	0.0357143	0	0	0	0	0	0.025	0	0	0	0	0.0217391	0	0.1	0	0	0	0	0	0.0322581	0	0	0	0	0
AMFR_2	209	16	56459399	51	CG	0.0192308	0	0.047619	0	0		0	0	0	0.047619	0	0	0	0	0	0.0212766	0	0	0	0	0	0.0322581	0	0	0	0	0	0	0	0	0.0232558	0.0666667		0	0	0	0	0	0	0	0	0	0	0
AMFR_2	212	16	56459402	48	CG	0	0	0	0	0		0	0	0	0	0.0222222	0	0	0	0	0	0	0	0	0	0	0.03125	0	0	0	0	0	0	0	0	0	0		0	0	0	0	0	0	0	0	0	0.0666667	0
AMFR_2	217	16	56459407	43	CG	0	0	0	0	0.047619		0	0	0	0	0	0.030303	0	0	0	0.0333333	0	0	0	0	0	0		0	0	0	0	0	0	0	0	0		0	0	0	0	0	0	0	0	0	0.1	0
AMFR_2	222	16	56459412	38	CG	0	0	0	0	0.05		0	0	0	0	0	0	0	0	0.0909091	0	0	0	0.0526316	0	0	0	0	0	0	0	0	0	0	0	0	0		0.0666667	0	0.0714286	0	0	0	0	0	0	0	0
AMFR_2	224	16	56459414	36	CG	0	0	0	0.04	0		0	0	0	0	0	0	0	0	0	0	0	0	0	0		0	0	0	0	0	0	0	0	0	0			0	0	0	0.0666667	0	0	0		0		0
AMFR_3	94	16	56458225	1225	CG	0.0231959	0.0137931	0.0539216	0.0173913	0.0237581	0.016129	0.0602094	0.0153061	0.0680851	0.0107527	0.0443623	0.0325901	0.00584795	0.00749064	0.05	0.0681431	0.0541872	0.0390625	0.0526316	0.045614	0.039548	0.0538922	0.0427632	0.0202703	0.0191898	0.0176471	0.0307692	0.0246238	0.0769231	0.021978	0.0212766	0.0269542	0.0305344	0.0333333	0.0208333	0.020362	0.0555556	0.0241187	0.0196078	0.0210526	0.0486486	0.0286624	0.0137615	0.0186916
AMFR_3	197	16	56458122	1328	CG	0.0838926	0.038961	0.144578	0.0415094	0.0855615	0.185567	0.128378	0.0451613	0.0721649	0.0805369	0.145161	0.0872483	0.0657895	0.0533981	0.169811	0.175476	0.0981595	0.0662252	0.132132	0.091314	0.0785714	0.0965251	0.0913043	0.0470085	0.0729167	0.0777778	0.0964467	0.0862069	0.178218	0.0824176	0.0781671	0.0793103	0.0640394	0.0843882	0.062963	0.0508475	0.0661157	0.0712644	0.0304569	0.0486726	0.136986	0.0860656	0.0971429	0.0488372
FBXW7_1	26	4	153456861	386	CG	0.00671141	0	0.0283688	0	0.0152672	0.025	0.0337838	0.0181818	0	0.0172414	0.00534759	0.015625	0	0.0169492	0.04	0.0243902	0	0.0210526	0.0241935	0.035461	0.0465116	0.0106383	0.0136986	0.0152672	0.0152672	0.00746269	0.0212766	0.021164	0.0253165	0.0275862	0	0	0.047619	0	0	0	0.0133333	0	0.00813008	0	0	0.00877193	0	0
FBXW7_1	31	4	153456856	391	CG	0.0540541	0	0.0291971	0.0288462	0.00757576	0	0.0272109	0.037037	0.0183486	0.026087	0.0265957	0	0.0357143	0.0169492	0	0.0487805	0.0361446	0.0106383	0.0252101	0.0428571	0	0.0319149	0.0277778	0.0381679	0.00763359	0.0447761	0.0283688	0.0212766	0.0126582	0.0136986	0.031746	0.0190476	0	0.05	0.00980392	0.0581395	0	0.0189873	0.0327869	0.0135135	0	0.0265487	0.03125	0.0201342
FBXW7_1	38	4	153456849	398	CG	0.0264901	0.0123457	0.0142857	0.00961538	0.0150376	0	0.00675676	0.0185185	0	0.017094	0.0160428	0.015748	0.0212766	0.0166667	0	0.00588235	0.0232558	0.0105263	0.016129	0.0283688	0.0232558	0	0.0135135	0.0229008	0.00763359	0.0373134	0.020979	0.0157895	0.0128205	0.0202703	0.0153846	0	0.0731707	0.016129	0.00970874	0.0113636	0	0.0125786	0.00813008	0.0131579	0.0232558	0.0263158	0.0151515	0.0201342
FBXW7_1	45	4	153456842	405	CG	0.0140845	0.0142857	0.0241935	0.0412371	0.017094	0.0384615	0.0215827	0	0.0106383	0.0582524	0.0280899	0.00900901	0.00884956	0.0638298	0.0285714	0.0251572	0.114286	0.0886076	0.0258621	0.016	0.0294118	0.0352941	0	0.0275229	0.0689655	0.00869565	0.0152672	0.026455	0.0136986	0.0144928	0.0175439	0.0107527	0	0.0377358	0	0.025641	0	0.0138889	0.0280374	0.030303	0	0.0363636	0	0.0140845
FBXW7_1	80	4	153456807	440	CG	0.0579151	0.0526316	0.0553191	0.0756757	0.0930233	0.0217391	0.055336	0.0454545	0.0625	0.0829016	0.0470588	0.0521327	0.0487805	0.111111	0.0451128	0.0273038	0.0530303	0.0397351	0.0324074	0.0429185	0.03125	0.0440252	0.0826446	0.0558376	0.0375587	0.0188679	0.0334728	0.0461095	0.0620155	0.0284553	0.0392157	0.030303	0.0384615	0.0103093	0.0387097	0.027972	0.0512821	0.045283	0.045	0.0578512	0.0588235	0.010101	0.0357143	0.019084
FBXW7_1	85	4	153456802	445	CG	0.0501931	0.0451128	0.0295359	0.0324324	0.0514019	0.0652174	0.0585938	0.0681818	0.0628571	0.0414508	0.0529412	0.0236967	0.057971	0.0777778	0.0300752	0.0546075	0.0746269	0.0728477	0.0601852	0.0386266	0.0625	0.075	0.0672269	0.0406091	0.0511628	0.028169	0.0420168	0.0461095	0.0387597	0.0528455	0.0490196	0.0242424	0.02	0.0625	0.00649351	0.034965	0.05	0.0451128	0.0447761	0.0330579	0.0294118	0.0552764	0.0530973	0.0496183
FBXW7_1	94	4	153456793	454	CG	0.0383142	0.0441176	0.0843882	0.0588235	0.037037	0.0434783	0.0505837	0.0454545	0.0564972	0.0618557	0.0855457	0.088785	0.0576923	0.0449438	0.0571429	0.0612245	0.0518519	0.0794702	0.0691244	0.059322	0.0625	0.0613497	0.0661157	0.0904523	0.0648148	0.0751174	0.0958333	0.0716332	0.0542636	0.0691057	0.0891089	0.0424242	0.0588235	0.0918367	0.0903226	0.0851064	0.0661157	0.0636704	0.0696517	0.0495868	0.0735294	0.100503	0.079646	0.0572519
FBXW7_1	101	4	153456786	461	CG	0.119231	0.0729927	0.155462	0.0748663	0.0921659	0.0869565	0.144531	0.0337079	0.107345	0.0615385	0.0994152	0.153488	0.057971	0.0549451	0.0496454	0.0887372	0.0592593	0.10596	0.0555556	0.130802	0.15625	0.0670732	0.130081	0.0792079	0.0779817	0.134259	0.0699588	0.113636	0.128788	0.0609756	0.0784314	0.0731707	0.150943	0.0918367	0.0709677	0.0758621	0.139344	0.100746	0.079602	0.16129	0.114286	0.0753769	0.113043	0.0867925
FBXW7_1	107	4	153456780	467	CG	0.0572519	0.0437956	0.0627615	0.115789	0.0917431	0.0425532	0.0501931	0.101124	0.0726257	0.0612245	0.0898551	0.0514019	0.0751174	0.0769231	0.0915493	0.0580205	0.0666667	0.0463576	0.0765766	0.0714286	0.0625	0.0372671	0.0645161	0.0445545	0.0590909	0.0368664	0.0781893	0.0617978	0.0606061	0.0728745	0.0576923	0.0184049	0.0754717	0.0204082	0.0559006	0.0604027	0.0813008	0.0732601	0.0492611	0.0866142	0.111111	0.065	0.0854701	0.0749064
FBXW7_1	113	4	153456774	473	CG	0.0625	0.0434783	0.0295359	0.035533	0.0900901	0.0416667	0.0492424	0.0434783	0.0384615	0.035533	0.0578035	0.0458716	0.0610329	0.0531915	0.0547945	0.037037	0.028777	0.0516129	0.04	0.025	0.0615385	0.0658683	0.0967742	0.057971	0.0533333	0.0267857	0.0322581	0.030303	0.0141844	0.052	0.0446429	0.0414201	0.0892857	0.0283019	0.0613497	0.0451613	0.0406504	0.0744681	0.0533981	0.0294118	0.027027	0.0194175	0.0406504	0.0477941
FBXW7_1	116	4	153456771	476	CG	0.025641	0	0.0334728	0.0606061	0.0358744	0.0208333	0.0339623	0.0652174	0.043956	0.0304569	0.0375723	0.0319635	0.0280374	0.0106383	0.0340136	0.033557	0.0359712	0.025641	0.0177778	0.0124481	0	0.0299401	0.048	0.0192308	0.0353982	0.00892857	0.0241935	0.027248	0.0492958	0.0119522	0.0176991	0.0532544	0.0350877	0.0566038	0.0426829	0.0384615	0.0162602	0.0214286	0.0291262	0.0437956	0.0135135	0.0194175	0.00806452	0.0147059
FBXW7_1	119	4	153456768	479	CG	0.0110294	0.0428571	0.00416667	0.0100503	0.0313901	0	0.00754717	0.0215054	0.010929	0	0.0200573	0.0272727	0	0	0.0340136	0	0.013986	0	0.00884956	0.0123967	0	0.0359281	0.016	0.0143541	0.00444444	0	0.00401606	0.013587	0	0.00398406	0	0	0.0714286	0	0.0242424	0	0.008	0.00352113	0.038835	0	0.027027	0.00961538	0	0.00735294
FBXW7_1	123	4	153456764	483	CG	0.0109489	0.0215827	0	0	0.00892857	0	0.018797	0	0	0.00507614	0.00573066	0.00909091	0.00930233	0.0208333	0	0.0200669	0.00694444	0.0128205	0.0264317	0.0205761	0	0	0	0.00480769	0.0176211	0.00873362	0.031746	0.0136612	0.0140845	0.015873	0	0	0	0	0.0121212	0.0193548	0.0645161	0.00704225	0.0144231	0	0	0	0.00806452	0
FBXW7_1	129	4	153456758	489	CG	0.0109489	0.0143885	0.0166667	0.040201	0.00888889	0	0.0075188	0.0215054	0.0163043	0.010101	0.019943	0	0.00930233	0.0104167	0	0.0267559	0	0.0192308	0.00881057	0.0123457	0.0606061	0.0240964	0.016	0	0.00881057	0.00873362	0.015748	0.0162602	0.020979	0.0238095	0	0.0235294	0	0.0188679	0.0240964	0.00636943	0	0.0140845	0.0192308	0.080292	0	0.0336538	0.0322581	0.0148148
FBXW7_1	133	4	153456754	493	CG	0	0.0147059	0	0.0102564	0.018018	0	0.0150943	0	0.0274725	0.020202	0.0142045	0.0183486	0.00469484	0.0104167	0	0.00673401	0.020979	0.00641026	0	0.0248963	0	0.0121951	0	0.00970874	0.0222222	0.00892857	0.0526316	0.0108992	0.0431655	0.008	0.0173913	0.011976	0	0	0.011976	0.038961	0.00813008	0.0286738	0.00966184	0.037594	0.0131579	0.00485437	0.0245902	0.00373134
FBXW7_1	142	4	153456745	502	CG	0.00716846	0	0.00809717	0	0.00873362	0.037037	0.00371747	0	0.0104167	0	0	0.004329	0.0227273	0	0.012987	0.00649351	0	0	0.0255319	0	0	0	0	0.0137615	0	0.0371901	0	0.00534759	0.013245	0.00784314	0	0.103448	0.0322581	0	0.0229885	0.0113636	0	0.0237288	0	0	0	0.00934579	0	0.00361011
FBXW7_1	150	4	153456737	510	CG	0.00361011	0	0.012605	0.0049505	0.00446429	0	0	0.0105263	0.0106383	0	0.00849858	0.0132743	0.00471698	0	0.00636943	0.00651466	0.00671141	0.00628931	0.00865801	0.00823045	0	0	0.00793651	0	0.0131579	0	0	0.00269542	0.00666667	0	0	0.00571429	0.0163934	0	0	0	0.0153846	0.00687285	0.0287081	0	0.0125	0.00952381	0	0.021978
FBXW7_1	153	4	153456734	513	CG	0.00609756	0.0123457	0.0214286	0.00833333	0	0	0.00649351	0.0350877	0.00909091	0.00862069	0	0.0152672	0	0	0.0106383	0.00552486	0.0215054	0.011236	0.00714286	0	0.0227273	0.00952381	0	0.0232558	0	0.00675676	0.0136986	0.00454545	0.0106383	0.00675676	0.025641	0	0	0.0131579	0.00917431	0.00884956	0	0	0	0.011236	0	0.00806452	0.0125	0.00613497
FBXW7_1	158	4	153456729	518	CG	0.0124224	0	0	0	0.00787402	0	0.00666667	0	0	0.00869565	0.00512821	0	0	0.0350877	0	0	0	0	0	0.00719424	0	0	0.0277778	0	0	0.00689655	0.00699301	0.00465116	0	0.0137931	0	0	0.027027	0	0	0	0	0	0.00819672	0	0	0	0	0.00617284
FBXW7_1	166	4	153456721	526	CG	0.00636943	0.0125	0	0.00917431	0.016129	0	0.00675676	0.0181818	0	0	0.0103093	0	0	0.0172414	0	0.0176471	0	0.0114943	0.015625	0.0142857	0	0.019802	0	0	0.0230769	0.0145985	0	0.00487805	0	0.0070922	0	0.00970874	0	0.0138889	0	0	0	0.0125786	0.025	0	0.0217391	0	0	0.0129032
FBXW7_1	170	4	153456717	530	CG	0.00680272	0	0	0.0408163	0.0166667	0.037037	0.00704225	0	0	0.00952381	0.00546448	0	0	0.0196078	0	0.00632911	0.0126582	0.0121951	0.00819672	0.00769231	0	0.0229885	0.0153846	0.026087	0	0.00819672	0.00757576	0.015	0.0120482	0.00729927	0	0.0210526	0	0.0163934	0.0217391	0	0	0.00671141	0.0178571	0	0	0.00900901	0	0.00680272
FBXW7_1	176	4	153456711	536	CG	0	0	0.00699301	0.00925926	0.00775194	0	0.0184049	0	0.0490196	0.00900901	0.0197044	0.0148148	0.0247934	0	0	0.00588235	0	0.0103093	0.0142857	0.00680272	0	0.0222222	0.0285714	0	0	0.00684932	0	0.0243902	0	0	0	0.0294118	0	0	0.0208333	0.0568182	0.0151515	0	0	0	0.025	0.0176991	0	0.00645161
FBXW7_2	27	4	153457427	-180	CG	0.00630063	0	0.00114943	0.00287356	0.00808314	0.00847458	0.00902256	0.00680272	0.00770218	0.0131234	0.00974659	0.0106007	0	0.00245098	0.00276052	0.00692695	0.00326087	0.00788955	0.00632111	0.0104058	0.0139373	0.00363636	0.0169492	0.010296	0.00369458	0.00369458	0.00752587	0.00421274	0.00736067	0.00255754	0.0118544	0.00377358	0	0.00578035	0.00521376	0.00583431	0.00769231	0.00705882	0.00693756	0.0108844	0.00525855	0.00979192	0.00974659	0.00390879
FBXW7_2	30	4	153457430	-183	CG	0.00450045	0.00380952	0.0045977	0.00766284	0.00346021	0.0211864	0.00300752	0.00907029	0.00513479	0.00393185	0.00389864	0.00353357	0.00537634	0.00488998	0.00621547	0.00440806	0.00326087	0.00197628	0	0.00312175	0.0104895	0.00363636	0	0.003861	0.00492611	0.00246305	0.0056444	0.00683851	0.0147213	0.00575448	0.00169348	0.0151229	0.00168634	0.00577367	0.00834202	0.00583431	0.00923077	0.00627451	0.00594648	0.0163265	0.0035057	0.00366748	0.00584795	0.00586701
FBXW7_2	34	4	153457434	-187	CG	0.0126013	0.0019084	0.00574053	0.00382409	0.00230681	0	0.00754148	0.00453515	0.00770218	0.0065445	0.00584226	0.00705467	0.016129	0	0.00552105	0.00629723	0.00434311	0.00790514	0.00632111	0.00312175	0	0.0181818	0	0.0102696	0.00617284	0.00616523	0.00471254	0.00473684	0.00421053	0.0044843	0.00508475	0.00564972	0.00168634	0.00461361	0.00521376	0.00233372	0.00923077	0.0054902	0.0049554	0.00680272	0.00175131	0.00244798	0.00487329	0.00520494
FBXW7_2	44	4	153457444	-197	CG	0.00540541	0.00380952	0.00459242	0.00477555	0.00806452	0.00421941	0.00150376	0.00226757	0.00641026	0.0078534	0.0116845	0.010582	0.00529101	0	0.00275862	0.00567108	0.00650759	0.011811	0.00252525	0.00936524	0	0.0108696	0.0163934	0.0115237	0.00492005	0.0110837	0.0056391	0.0152551	0.0115546	0.00319693	0.00762066	0.0112782	0.0016835	0.00805524	0.00520291	0.00232829	0.0123077	0.00626468	0.0049505	0.00814111	0.00963222	0.00733496	0.00583658	0.00324886
FBXW7_2	49	4	153457449	-202	CG	0.0045045	0	0.00688073	0.00477555	0.00574713	0.00840336	0.00451128	0.00904977	0.00383142	0.0052356	0.00681597	0.00704225	0	0.00973236	0.00690131	0.00567108	0.00975081	0.00392927	0.00251889	0.0093361	0.00694444	0.0198198	0	0.00637755	0.00615006	0.00985222	0.00469484	0.00210084	0.00734523	0.00383387	0.00932203	0.0075188	0.010101	0.00345224	0.0062435	0.00699301	0.00153139	0.00548589	0.0039604	0.00810811	0.0122592	0.00851582	0.00679612	0.00780742
FBXW7_2	54	4	153457454	-207	CG	0.00630631	0.00380952	0.00688073	0.0104862	0.00805524	0.00420168	0.00750751	0.0113122	0.00637755	0.0104712	0.00387973	0.0193662	0.0052356	0.00243309	0.00965517	0.00756144	0.00324675	0.00590551	0.00630517	0.00829876	0.03125	0.00540541	0	0.0192061	0.00615006	0.0147783	0.00657277	0.00577731	0.00840336	0.00702875	0.00509771	0.0056391	0.00505902	0.00577367	0.00936524	0.0186263	0.0229709	0.0125098	0.00396432	0.0135135	0.0122485	0.0121655	0.00969932	0.00779221
FBXW7_2	56	4	153457456	-209	CG	0.00720072	0.00571429	0.00458716	0.00285987	0.00115075	0.00420168	0.003003	0.0113122	0.00127551	0.0104712	0.00581959	0.00702988	0.0157068	0.00973236	0.0103377	0.0107053	0.012987	0.00590551	0.0037831	0.00311203	0.0104167	0.00900901	0	0.00640205	0.00492005	0.00246609	0.0112676	0.00472689	0.00840336	0.00447284	0.00339271	0.0169173	0	0.00460299	0.00936524	0.0104651	0.00918836	0.00703675	0.0049505	0.0027027	0.00787402	0.00243309	0.00678952	0.00324465
FBXW7_2	63	4	153457463	-216	CG	0.00720721	0.0056926	0.00343643	0.00475737	0.0103211	0.0041841	0.0179372	0.00898876	0.00256082	0.0117647	0.00971817	0.00522648	0.0159574	0.00486618	0.00825877	0.00630517	0	0.0137525	0.0113208	0.00932642	0.0104167	0.0123894	0.015873	0.0230769	0.00610501	0.00615006	0.0056444	0.0089192	0.00210526	0.011465	0.00675676	0.00568182	0.00837521	0.010333	0.0103199	0.00231214	0.00916031	0.00856031	0.0098912	0.00671141	0.00876424	0.0121655	0.0106693	0.00907912
FBXW7_2	69	4	153457469	-222	CG	0.00810811	0.0113636	0.00228311	0.0190295	0.0114548	0.00833333	0.0119581	0.00449438	0.0101911	0.00912647	0.00777454	0.010453	0	0.0121359	0.0103235	0.00881612	0.00968784	0.0117647	0.00753769	0.015528	0.00692042	0.00884956	0	0.00254777	0.00730816	0.00738916	0.0056391	0.00786576	0.0189274	0.0133843	0.00422297	0.011257	0.0117057	0.0045819	0.014433	0.00808314	0.0121951	0.00543478	0.0118577	0.0107239	0.0174978	0.0121507	0.00773694	0.0181465
FBXW7_2	75	4	153457475	-228	CG	0.0145059	0.00572519	0.00342857	0.0114504	0.00344037	0.0168776	0.0044843	0.00455581	0.00384123	0.0182768	0.0117647	0.00878735	0.00520833	0	0.00966851	0.00759975	0.00647948	0.00792079	0.0126422	0.00625652	0.0138889	0.00177305	0.015625	0.0102171	0.00736196	0.00863132	0.0113208	0.00578339	0.0105485	0.0108765	0.00507614	0.00566038	0.016835	0.0172216	0.00311203	0.00695249	0.00461538	0.00856698	0.00595238	0.00537634	0.00877193	0.0134146	0.00875486	0.0104031
FBXW7_2	78	4	153457478	-231	CG	0.00900901	0.00189753	0.008	0.0104563	0.00803674	0.00833333	0.0119581	0.00224719	0.00255102	0.011734	0.00972763	0.010453	0.015625	0.0218447	0.00481431	0.00629723	0.0172228	0.00588235	0.0100503	0.00725389	0.0103806	0.0124113	0.015625	0.00764331	0.0146163	0.00985222	0.0169173	0.0146827	0.00736067	0.00956023	0.00929054	0.00750469	0	0.00802752	0.0123839	0.00578035	0.00457317	0.0100932	0.0108696	0.00670241	0.00788091	0.0145808	0.0145068	0.00648088
FBXW7_2	84	4	153457484	-237	CG	0.0117117	0.0151803	0.010274	0.00949668	0.0103211	0.00416667	0.0044843	0.0224719	0.00636943	0.00912647	0.0136187	0.010453	0.0366492	0.0169903	0.0123882	0.0125945	0.00862069	0.00392157	0.00879397	0.015528	0.0207612	0.00531915	0	0.0165816	0.0182704	0.00738916	0.0103383	0.00996329	0.0105152	0.0044586	0.0109797	0.011257	0.0117057	0.00688073	0.00722394	0.0231214	0.0121951	0.00776398	0.00790514	0.0174263	0.0113835	0.00607533	0.00386847	0.014906
FBXW7_2	92	4	153457492	-245	CG	0.00811542	0.00189753	0.008	0.0085389	0.00230415	0.00416667	0.00449102	0.00898876	0.00127714	0.00130378	0.0077821	0	0.00526316	0.00485437	0.00206327	0.00252048	0.00538213	0.00588235	0.00503145	0.00310238	0.00346021	0.00177936	0	0.00255428	0.00610501	0.00369914	0.00093985	0.00419507	0.00736842	0.0044586	0.010989	0.00187617	0.0033557	0.00688863	0.00103306	0.00462963	0.0137195	0.00621118	0.00197628	0.00536913	0.00350263	0.00121507	0.00386847	0.00584795
FBXW7_2	96	4	153457496	-249	CG	0.0180343	0.0151803	0.008	0.00759013	0.0149254	0.00833333	0.0179104	0.00894855	0.00511509	0.0104302	0.00585938	0.0121739	0.0105263	0.00970874	0.00480439	0.0119497	0.00967742	0.0117647	0.0150943	0.00825593	0.00692042	0.00357143	0.015625	0.0127714	0.010989	0.0160099	0.0047081	0.00995807	0.00946372	0.0108211	0.00760135	0.0168856	0.00337268	0.016055	0.010352	0.012761	0.00763359	0.00855365	0.00691017	0.00672948	0.00699913	0.00728155	0.0125483	0.0078125
FBXW7_2	98	4	153457498	-251	CG	0.00441696	0.00927644	0.00110497	0.012963	0.0055991	0.00406504	0.00290276	0.00856531	0.00247525	0.00504414	0.00947867	0.00840336	0.00518135	0.00230947	0.0138981	0.00367647	0.00418848	0.00189036	0.00717703	0.00589391	0.0206186	0.00868056	0.0153846	0.00490798	0.00471698	0.0168878	0.00636364	0.00611621	0.00611621	0.00804954	0.00658436	0.0127737	0.00330033	0.00220022	0.0060241	0.0101695	0.00594354	0.00755858	0.0152964	0.00653595	0.0102128	0.007034	0.00374181	0.0101138
FBXW7_2	129	4	153457529	-282	CG	0.0279263	0.0187032	0.0239342	0.0179602	0.0206264	0.0333333	0.0190381	0.00738552	0.0143824	0.0179795	0.0200129	0.00814901	0.0276817	0.0112	0.0217293	0.0207364	0.016523	0.0209618	0.0166251	0.0199725	0.0118203	0.013269	0.0116279	0.0172861	0.0140148	0.022351	0.0140073	0.0179187	0.0133615	0.0195915	0.0208451	0.0176991	0.0179978	0.0196672	0.0207219	0.014383	0.0233266	0.0129938	0.0231065	0.0171171	0.0156431	0.0175439	0.0178685	0.0154639
FBXW7_2	134	4	153457534	-287	CG	0.0154394	0.0137157	0.013463	0.0128041	0.0144928	0.0166667	0.0150301	0.00738552	0.0194585	0.00855432	0.0154939	0.0197905	0.0138408	0.0112	0.0131222	0.0165044	0.0208333	0.0184957	0.0149626	0.0144529	0.00943396	0.0180723	0	0.0121003	0.0148392	0.0140496	0.0127737	0.0154852	0.0196906	0.0154167	0.0123944	0.0202276	0.016835	0.00982615	0.0100134	0.0196821	0.0182556	0.0140333	0.0166881	0.00900901	0.013905	0.0191235	0.0114796	0.0231959
FBXW7_2	148	4	153457548	-301	CG	0.00835322	0.0187266	0.00524345	0.0128205	0.0129771	0.0111421	0.00100503	0.0162963	0.0110169	0.0171527	0.0116279	0.00584112	0.0103806	0.0224	0.0113379	0.0131635	0.00867052	0.011208	0.0133222	0.0199862	0.0070922	0.0108565	0	0.0147698	0.0157155	0.0057947	0.0122324	0.0103627	0.0176305	0.0163453	0.0186335	0.0190355	0.00785634	0.0106222	0.0161074	0.0159091	0.0111902	0.016658	0.0109536	0.0108696	0.0104651	0.00958466	0.0172966	0.0180879
FBXW7_2	152	4	153457552	-305	CG	0.0183727	0.0181818	0.0200893	0.0110092	0.0220507	0.00816327	0.0144718	0.0107527	0.00987654	0.00884956	0.00561798	0.0118644	0.021164	0.0116009	0.011984	0.0121212	0.0104167	0.00561798	0.0121212	0.0180905	0.00337838	0.0125	0	0.0111801	0.00714286	0.0131265	0.00906618	0.00911854	0.00913706	0.00981595	0.0139573	0.0108108	0.0179739	0.0199778	0.00996016	0.00898876	0.0146413	0.017177	0.00951475	0.0209974	0.0084317	0.00934579	0.0129991	0.0131086
FBXW7_2	169	4	153457569	-322	CG	0.00631769	0.00572519	0.0091954	0.0181992	0.00579374	0.0253165	0.00906344	0.0113379	0.0115979	0.0104849	0.013712	0.00707965	0.0107527	0.00733496	0.0131488	0.00692695	0.0130293	0.0118812	0.00380711	0.00521376	0.010453	0.00182149	0.0166667	0.00904393	0.00741656	0.0086741	0.00376648	0.0105485	0.0116156	0.00512164	0.00593723	0	0.0118443	0.0115607	0.0052356	0.00936768	0.00772798	0.00941915	0.0119522	0.00820793	0.0184372	0.00612745	0.00487805	0.00652742
FBXW7_2	175	4	153457575	-328	CG	0.0198377	0.0171429	0.0206897	0.00861244	0.0115741	0.0168776	0.00605144	0.0204082	0.0115979	0.013089	0.0127326	0.0230088	0.00537634	0.0122249	0.0152144	0.0151134	0.0130293	0.0138614	0.0241117	0.0104275	0.0174216	0.010929	0.05	0.0219355	0.0173482	0.0124069	0.0103578	0.017923	0.0105374	0.0140755	0.0118745	0.0150659	0.0236887	0.0196532	0.0167189	0.0221963	0.0108025	0.0211765	0.0119403	0.0150273	0.0219491	0.0183824	0.0146199	0.0195567
FBXW7_2	199	4	153457599	-352	CG	0.00361664	0	0.00460829	0.00480307	0.0023175	0	0.0060423	0.00909091	0.00515464	0.00391645	0.00588235	0.00176678	0.00529101	0.00980392	0.00622837	0.00630517	0.00217391	0.00594059	0.00126904	0.00520291	0.00348432	0.00728597	0.0333333	0.00516796	0.00618812	0.00373134	0.00659755	0.0100423	0.00422833	0.0057508	0.00764007	0.00564972	0.00847458	0.0127315	0.00941423	0.0116822	0.00772798	0.00866824	0.00698603	0.0109739	0.00439754	0.00982801	0.00195312	0.00913838
FBXW7_2	209	4	153457609	-362	CG	0.00820419	0.0172745	0.00350877	0.000959693	0.004662	0	0.00762195	0.00694444	0.00260756	0.0026455	0.00394477	0.0036036	0.0106383	0.00985222	0.00561404	0.00382897	0.00874317	0.0060241	0.00129702	0.00210748	0.00699301	0.00368324	0	0.00130548	0.005	0.00878294	0.00669216	0.00584795	0.00744681	0.00515132	0.00773196	0.00190114	0.0120898	0.00586166	0.00634921	0.00235571	0.00773994	0.0047619	0.00707786	0	0.00267142	0.00124844	0.00493097	0.00855826
FBXW7_3	22	4	153456043	1204	CG	0.00835322	0.00670241	0.0122324	0.0093633	0.00792079	0.0168539	0.00839161	0.00566038	0.0129564	0.00729927	0.0203046	0.0125945	0.00567644	0.00657895	0.00741656		0.0114213	0.0172414	0.00453515	0.00486618	0.00536193	0.00810537	0.00429799	0.00818182	0.0108108	0.0234467	0.00438982	0.0120321	0.0136555	0.0117541	0.00851064	0.0108865	0.00715137	0.0125	0.0106796	0.00823045	0.00268817	0.00480384	0.00541028	0.0108303	0.00976562	0.00599401	0.00274223	0.0150309
FBXW7_3	25	4	153456040	1207	CG	0.00954654	0.0134048	0.0122324	0.00560748	0.0128586	0.00280899	0.0027972	0.00188324	0.0153121	0.00486618	0.0101523	0.010084	0.0151372	0.0140977	0.00370828		0.0101394	0.0126437	0.00907029	0.0145808	0	0.00810537	0.0200861	0.00818926	0.00863931	0.007034	0.00964912	0.00868984	0.00210084	0.00993677	0.0113556	0.00933126	0.011919	0.0115274	0.00582524	0.00411523	0.00537634	0.0056	0.00540541	0.00722022	0.0078125	0.00698603	0.00639854	0.00706714
FBXW7_3	101	4	153455964	1283	CG	0.00493097	0.00992282	0.0126582	0.0126582	0.00831255	0.0070922	0.0104287	0.00943396	0.00389105	0.00407747	0.00420521	0.0151724	0.00468384	0.000784314	0.010978		0.00726895	0.00829493	0.00573614	0.0071066	0.0113122	0.0177966	0.00940071	0.0105026	0.0119266	0.00485437	0.00427046	0.00930997	0.00705467	0.00601956	0.00526624	0.00382166	0.006917	0.0106296	0.0135891	0.0201117	0.00776053	0.0193205	0.0105581	0.0010142	0.00877893	0.0108333	0.00840336	0.00443131
FBXW7_3	157	4	153455908	1339	CG	0.00835322	0.00401606	0.0182927	0.0149533	0.00891972	0.00561798	0.00701262	0.0112994	0.00706714	0.0194884	0.00609756	0.00754401	0.0103872	0.0093985	0.00926498		0.0228717	0.00805524	0.0124858	0.0169697	0.0187668	0.00809717	0.0143472	0.00818926	0.00971922	0.0128806	0.00964067	0.00935829	0.0136555	0.0153291	0.0134752	0.0186625	0.0107271	0.012476	0.0145631	0.0109739	0.00806452	0.00801282	0.00990991	0.0192308	0.00780488	0.0109671	0.011883	0.0141343
FBXW7_3	185	4	153455880	1367	CG	0.00717703	0.00935829	0.00609756	0.00559701	0.0099108	0.0140056	0.0153631	0.018797	0.0117509	0.0109356	0.0121827	0.0125733	0.00754006	0.0187793	0.0135719		0.0101394	0.0126292	0.0170068	0.00967352	0.0080429	0.00809717	0.0100287	0.00636943	0.0075594	0.007034	0.0175439	0.0106952	0.0168067	0.0135379	0.012766	0.0108527	0.0143027	0.00767018	0.00676983	0.0123457	0.00539811	0.00882117	0.00990099	0.00720288	0.0097561	0.00497512	0.0127971	0.00883392
FBXW7_3	215	4	153455850	1397	CG	0.00954654	0.0147059	0.0121951	0.0093633	0.0109019	0.00842697	0.00840336	0.00753296	0.00117647	0.00609013	0.00609137	0.010906	0.0047259	0.00657895	0.012971		0.00507614	0.00690449	0.0113507	0.00969697	0.00268097	0.0192308	0.0114613	0.00636943	0.0108108	0.0128957	0.0140351	0.00734312	0.0115546	0.0099278	0.00992908	0.0124417	0.00595948	0.00959693	0.00970874	0	0.0094086	0.00721154	0.0045045	0.00961538	0.00585938	0.00997009	0.00548446	0.00883392
GRINA_1	23	8	145064621	396	CG	0	0	0.0266667	0.00389105	0.00384615	0.0267857	0.00529101	0	0	0.015	0.0140845	0.00497512	0.00473934	0.012987	0	0.00904977	0.0046729	0.0117647	0	0.00387597	0.00884956	0.00833333	0	0.0060241	0.00434783	0	0.00409836	0.0100503	0.00469484	0.00348432	0.0238095	0.0108108	0	0	0.00520833	0	0.008	0.00431034	0	0.0187793	0.0241546	0.00331126	0.00355872	0.00983607
GRINA_1	29	8	145064627	402	CG	0	0	0.00666667	0.0116279	0.00377358	0.00877193	0.021164	0.0148148	0.00925926	0	0.00704225	0.00497512	0	0	0.0046729	0.00904977	0.00460829	0	0	0.0116732	0.0173913	0.0409836	0	0.0177515	0.00869565	0.0118343	0	0.0150754	0.00465116	0.0174216	0	0.00543478	0.0107527	0	0.0154639	0	0.0555556	0.0173913	0.0144928	0	0.0144231	0.013289	0.00711744	0.00328947
GRINA_1	34	8	145064632	407	CG	0.015873	0.0147783	0	0	0.00377358	0	0.015873	0	0	0.0346535	0.0176056	0.00492611	0.00934579	0.00645161	0.00465116	0.00900901	0.00458716	0	0	0.0116732	0	0	0.00847458	0.0235294	0.004329	0.00591716	0.00406504	0.0149626	0.00465116	0.00694444	0.00480769	0.0216216	0.0107527	0	0.00515464	0.0193237	0.0396825	0.0257511	0.0193237	0	0	0.00993377	0	0.0230263
GRINA_1	36	8	145064634	409	CG	0	0	0.0130719	0.0155642	0.0112782	0	0.015873	0.00740741	0.0138889	0.00990099	0.00704225	0.00492611	0.0186047	0.00645161	0.0231481	0.0135135	0.0138249	0.00578035	0.00829876	0.0116732	0.00869565	0	0.0169492	0	0	0.00591716	0.00813008	0.0175	0.00465116	0.00694444	0	0	0	0	0.0154639	0	0	0.00858369	0.0338164	0	0	0.00331126	0.0142349	0.00655738
GRINA_1	49	8	145064647	422	CG	0.0119048	0.00483092	0.0192308	0.0152672	0.00746269	0.0173913	0.00526316	0.00729927	0.0136364	0.00980392	0.0105263	0.00485437	0.0229358	0.01875	0.00913242	0.00884956	0.040724	0.0454545	0.0327869	0.00769231	0.017094	0.0153846	0.00833333	0.0168539	0.0295359	0.0231214	0.0404858	0.0124688	0.00458716	0.00687285	0	0.0106952	0	0	0.0564103	0.0142857	0	0.0411523	0.00961538	0.00456621	0.00483092	0.0131148	0.00701754	0.00974026
GRINA_1	55	8	145064653	428	CG	0.004	0.0193237	0.00645161	0.00381679	0.0112782	0.00862069	0.00529101	0.00729927	0.00454545	0.00490196	0.0139373	0.0144928	0	0.00628931	0.00917431	0.00884956	0	0.00568182	0.00816327	0.0114943	0.00862069	0	0.00833333	0.0110497	0	0.0172414	0.0278884	0.00249377	0.00454545	0.00689655	0.00934579	0.0106383	0	0	0.010101	0.0047619	0	0.00411523	0.00480769	0.0044843	0.00473934	0.0197368	0	0.0130293
GRINA_1	69	8	145064667	442	CG	0	0	0.013245	0.00769231	0.00377358	0.00877193	0.00526316	0.00735294	0.00456621	0.01	0.0105634	0.0195122	0.0327103	0.00625	0.0183486	0.0132743	0.00913242	0.0167598	0.00819672	0	0.025641	0.015625	0.00833333	0.00561798	0.00843882	0.0117647	0	0.0124069	0	0.0243056	0.00471698	0.00526316	0.0102041	0.0169492	0	0.00478469	0.0300752	0.0163265	0.00956938	0.0136364	0	0.00326797	0.00347222	0.00974026
GRINA_1	73	8	145064671	446	CG	0.0120482	0.00478469	0.013245	0.0192308	0.00749064	0.0172414	0.0157068	0.0218978	0.00909091	0.0199005	0.0210526	0.0146341	0.0325581	0	0.00454545	0.0221239	0.0136364	0.0167598	0.00409836	0.0153846	0.00847458	0.00775194	0	0.00564972	0	0	0.00411523	0.0173697	0	0.017301	0.00938967	0	0	0.0169492	0	0.0047619	0.030303	0.0246914	0	0.0181818	0.00469484	0.0131148	0.0207612	0.012987
GRINA_1	86	8	145064684	459	CG	0	0.00925926	0.00645161	0.00749064	0.0109489	0.00826446	0	0.0136986	0.00436681	0.0193237	0.0137931	0.00934579	0.0137615	0.0123457	0.00869565	0	0.0133929	0	0	0.00757576	0	0	0	0.00555556	0.00806452	0.0114286	0.00813008	0.00241546	0.00892857	0	0.00921659	0	0	0.00813008	0.005	0.00938967	0.00684932	0.00790514	0.0224215	0.00444444	0.00465116	0.0223642	0.00337838	0.0257235
GRINA_1	91	8	145064689	464	CG	0.008	0	0	0.0109091	0.00362319	0	0.00507614	0.00671141	0.00854701	0	0.0103448	0.00462963	0.00909091	0.00613497	0	0.0172414	0	0.021978	0	0.00374532	0.0403226	0	0.00793651	0.0166667	0	0.00568182	0.0161943	0.00722892	0.0135135	0.00343643	0.00456621	0.0206186	0	0.04	0.0149254	0.00465116	0.00680272	0.00393701	0.0132743	0.0133333	0.0140845	0.00634921	0	0.00638978
GRINA_1	98	8	145064696	471	CG	0.0120482	0.00917431	0.0128205	0.00729927	0.0107914	0.00833333	0.00510204	0.0205479	0.012766	0.00478469	0.00346021	0.028436	0.0135747	0	0.0131004	0.00434783	0.00452489	0	0.016129	0.0113208	0.00819672	0.0137931	0.00787402	0.021978	0.016129	0.0228571	0	0.00481928	0.0363636	0.00687285	0.0136986	0.0102041	0.03	0.016129	0.010101	0.0138249	0.0211268	0.00790514	0.00446429	0.0175439	0	0.0031746	0.00337838	0.00952381
GRINA_1	102	8	145064700	475	CG	0.004	0.00917431	0.0127389	0.0109091	0.0108303	0.00806452	0.0100503	0.0266667	0.0125	0.0191388	0.024055	0.0231481	0.00900901	0.0121951	0.0304348	0.0171674	0	0.00543478	0.0202429	0.011236	0	0.0201342	0.0314961	0.0273224	0.0358566	0.0224719	0.0159363	0.00959233	0.0044843	0.0171233	0.0409091	0.00515464	0.0566038	0.04	0.0100503	0.00913242	0.00680272	0.0117647	0.0309735	0.0132159	0.0139535	0.00315457	0.00668896	0.0157233
GRINA_1	114	8	145064712	487	CG	0.00790514	0.00458716	0.00625	0.0181159	0.00363636	0.008	0.0100503	0	0	0	0.0207612	0.00913242	0.018018	0	0.00434783	0.0128755	0.00444444	0.0273224	0.0201613	0.00749064	0.008	0	0	0.00546448	0	0.00568182	0.0121457	0.00721154	0	0.00673401	0.0136364	0.00518135	0.00952381	0.0403226	0.010101	0.00917431	0.0202703	0	0.00877193	0.0262009	0.0138889	0.0158228	0	0.0157233
GRINA_1	118	8	145064716	491	CG	0.0117188	0.00458716	0.0125	0.00719424	0.0106762	0.008	0.00505051	0.00666667	0.00411523	0.00947867	0.00337838	0.0223214	0	0.00598802	0	0	0.00442478	0.0160428	0	0	0.00787402	0	0.015748	0.00540541	0.0119522	0.0112994	0.00396825	0.00238095	0	0.0033557	0	0	0	0	0.00490196	0.00900901	0	0.0156863	0	0	0	0.0126183	0.00980392	0.00310559
GRINA_1	123	8	145064721	496	CG	0.0117188	0.0181818	0.01875	0	0.00357143	0.024	0.0100503	0.00671141	0.00411523	0.014218	0.0234899	0.0179372	0.00446429	0.00595238	0.00431034	0.029661	0.004329	0.016129	0.0119048	0.0332103	0.00793651	0.00657895	0	0.00546448	0.00393701	0.0114943	0.00396825	0.0118765	0.0355556	0.0100334	0.00900901	0.00512821	0	0.00806452	0.00985222	0.0045045	0.00662252	0.015748	0.0264317	0.00436681	0.0185185	0.0125786	0.00327869	0.00626959
GRINA_1	129	8	145064727	502	CG	0.0273438	0	0.0130719	0.00367647	0.00361011	0.0330579	0.0152284	0.0136986	0.0209205	0.0191388	0.010101	0.0273973	0.0135135	0.00606061	0.00888889	0.012987	0.0305677	0.0108108	0.00403226	0.0221402	0.016	0.0205479	0	0	0.016129	0.00581395	0.008	0.00719424	0.0227273	0.0101351	0.00909091	0.0103627	0.04	0	0	0.00904977	0.00684932	0.0164609	0.0264317	0	0.00462963	0.0127389	0.00986842	0
GRINA_1	152	8	145064750	525	CG	0.0196078	0	0.0130719	0.00364964	0.010989	0.00840336	0	0	0.00873362	0.0195122	0.00342466	0.00471698	0.0365297	0	0.00904977	0.0176211	0.0179372	0.0111732	0.0246914	0.00373134	0.0247934	0	0.015748	0.0174419	0.0162602	0.0115607	0.00403226	0.0173267	0	0.024055	0.0232558	0.0052356	0.04	0	0.0101523	0	0	0.025	0.00444444	0	0.00938967	0.00649351	0	0.00321543
GRINA_1	159	8	145064757	532	CG	0.0387597	0.0234742	0.00649351	0.00735294	0.0181159	0.0661157	0.0206186	0.0342466	0.021645	0.0338164	0.0101695	0.00934579	0.00454545	0	0.0181818	0.0175439	0.00873362	0.010989	0.0122449	0.0223048	0	0	0	0.0287356	0.0121457	0.0115607	0.008	0.00982801	0.00900901	0.0376712	0.0136986	0.0103627	0.0707071	0	0.0049505	0.00909091	0	0	0	0.00456621	0.00465116	0.0128205	0.00668896	0.00645161
GRINA_1	168	8	145064766	541	CG	0.00392157	0.0144928	0.0394737	0.00743494	0.0110294	0.00869565	0.0210526	0.0142857	0.0226244	0.039604	0.0205479	0.00966184	0.0138249	0.0123457	0.0187793	0.0045045	0.0134529	0.0168539	0.0289256	0.0189394	0.034188	0.00769231	0	0.0118343	0.012605	0.0174419	0.00806452	0.00744417	0.0185185	0.0137931	0.00934579	0	0.0106383	0.00862069	0	0	0.00757576	0.017094	0.00465116	0.00456621	0.00952381	0.00326797	0.00346021	0.00970874
GRINA_1	171	8	145064769	544	CG	0.0156863	0.00961538	0.00662252	0.0147601	0.018315	0.0175439	0.0157895	0.0141844	0.00904977	0.0346535	0.0171821	0	0.00460829	0.0184049	0.00934579	0.0134529	0	0.00568182	0.00829876	0.0227273	0.026087	0	0.0165289	0	0.0125523	0.0116959	0.00806452	0.0149254	0	0.0103093	0.00930233	0.0107527	0.0106383	0.0263158	0.00507614	0	0.00757576	0.0170213	0.00925926	0.0228311	0	0.00980392	0.0139373	0.0161812
GRINA_1	191	8	145064789	564	CG	0.0118577	0.00487805	0.0466667	0.0150376	0.00738007	0.0350877	0.00531915	0.0218978	0.0318182	0.0252525	0.0383275	0.0147059	0.037037	0.025	0.112676	0.0358744	0.0409091	0.0348837	0.0373444	0.0191571	0.0350877	0.00793651	0.0172414	0.0118343	0.00425532	0.0176471	0.0204082	0.0199501	0.0465116	0.037931	0.00478469	0.00540541	0	0.0175439	0.0206186	0.07109	0	0.0515021	0.0190476	0.0139535	0.00480769	0.0130719	0.0596491	0.0226537
GRINA_1	198	8	145064796	571	CG	0.00790514	0.00970874	0.00666667	0.0037594	0.0148148	0	0	0.00729927	0.00909091	0.00505051	0.00694444	0	0.00925926	0.00625	0.00469484	0.00896861	0.00909091	0.0174419	0	0.0114943	0	0	0.00854701	0	0.00843882	0.00588235	0.0163265	0.0199501	0	0.0103448	0.0428571	0.00540541	0.010989	0	0.00518135	0.0189573	0	0	0	0	0.0144231	0.0196078	0.00350877	0.00970874
GRINA_1	209	8	145064807	582	CG	0.028	0	0.0205479	0.0229885	0.0150943	0.00900901	0.021164	0.0222222	0.00469484	0.0357143	0.0209059	0	0.0422535	0	0.0239234	0.0452489	0.0138889	0.00581395	0.0333333	0.0195312	0.00892857	0.008	0.00862069	0.00609756	0.004329	0.0242424	0.0123457	0.0176322	0.0657277	0.020979	0.0480769	0.0163043	0.0111111	0	0.0104712	0.0047619	0.00793651	0.0474138	0.00990099	0.0187793	0.0144928	0.0465116	0.0320285	0.0132013
GRINA_1	223	8	145064821	596	CG	0.0281124	0.00980392	0.00689655	0.0152672	0.0037594	0	0.0106952	0.037037	0.0140845	0.0204082	0.010453	0.0049505	0	0.00636943	0.0236967	0.0136364	0.0186047	0.0116959	0.012605	0.0234375	0.00884956	0.00806452	0.0173913	0.0181818	0.0262009	0.0120482	0.0123967	0.0177215	0.00473934	0.0105263	0.0144231	0.0163043	0.032967	0	0.00529101	0.0238095	0.00793651	0.00865801	0.0197044	0.00471698	0.00966184	0.0265781	0.0283688	0.0294118
GRINA_2	31	8	145065326	1101	CG	0.117647	0	0.0434783	0	0.0322581		0.0266667		0.15	0.0833333	0.0434783	0.08	0.0434783			0.037037	0	0	0.1	0			0	0.16129	0	0.047619	0.0555556		0.0434783	0.0909091	0.0344828	0	0		0	0		0	0.105263	0	0.0588235	0	0.142857	0
GRINA_2	37	8	145065320	1095	CG	0.166667	0	0.125	0.0277778	0.0810811	0	0	0	0.15	0.0625	0.04	0.0689655	0.0967742	0		0.0967742	0	0.0588235	0.0731707	0			0.0769231	0	0	0.0454545	0.0869565		0.0769231	0	0.0555556	0	0		0	0	0	0	0	0	0	0	0.111111	0
GRINA_2	40	8	145065317	1092	CG	0.0555556	0.133333	0.291667	0.0512821	0.105263		0.338129	0.363636	0.190476	0.368421	0.0384615	0.166667	0.264706	0.428571		0.0625	0.111111	0.117647	0.341463	0.55			0.307692	0.340426	0.2	0.238095	0.173913		0.387097	0.294118	0.243243	0.388889	0.1		0.488889	0.25	0.533333	0.263158	0.15	0.352941	0.275	0.2	0.333333	0.205128
GRINA_2	55	8	145065302	1077	CG	0.263158	0	0.222222	0.0526316	0.0606061	0	0		0.157895	0.153846	0.0833333	0.25	0.125			0.185185	0.0555556	0.3	0.192308	0				0.259259	0	0.142857	0.153846		0.105263	0.157895	0.05			0.1	0			0	0		0	0	0.166667	0.0769231
GRINA_2	102	8	145065255	1030	CG	0.0625	0	0.133333	0.0555556	0.030303		0		0.111111	0.0909091	0.0416667	0.105263	0.0769231			0.0909091	0		0.0833333	0				0.227273	0	0.0666667	0.0666667		0.181818	0	0				0			0	0		0	0		0
GRINA_2	116	8	145065241	1016	CG	0	0	0	0.0454545	0.0285714		0		0	0	0	0	0	0		0	0	0	0.0344828	0				0	0	0.117647	0	0.0833333	0.0526316	0	0			0	0			0	0	0	0.0588235	0		0
GRINA_2	133	8	145065224	999	CG	0	0.0769231	0.217391	0.0526316	0.0294118			0	0.0769231		0	0	0			0	0	0	0	0.0833333				0.0833333		0	0	0.0555556	0	0.037037	0							0	0	0	0	0	0	0.0322581
GRINA_2	146	8	145065211	986	CG	0	0.0769231	0	0	0.0357143			0	0		0	0				0.130435	0	0.0833333	0	0.0833333				0.0434783		0	0.0555556	0	0	0	0.0588235							0	0		0			0.0740741
GRINA_2	154	8	145065203	978	CG			0.0714286	0.272727	0				0		0					0			0.0625					0.0714286			0.0909091	0.0909091	0	0	0.2										0			0.0952381
GRINA_2	156	8	145065201	976	CG			0.0714286	0	0				0		0					0			0.0625					0.0769231			0.1	0.0909091	0	0	0.0833333										0			0.0454545
GRINA_2	165	8	145065192	967	CG					0				0.166667		0.0909091					0			0					0						0.1
GRINA_2	169	8	145065188	963	CG			0	0.0909091	0.125				0		0					0			0					0.0714286			0.166667	0	0	0.0625	0										0			0.0454545
GRINA_2	173	8	145065184	959	CG			0.0714286	0.0909091	0.125				0.0625		0	0				0.0666667			0.1875					0.142857		0	0	0	0	0.0588235	0										0.0625			0
GRINA_2	176	8	145065181	956	CG			0.0714286	0.181818	0.125				0		0.0769231	0				0			0.0666667					0		0.1	0	0	0	0	0										0.0625			0.0434783
GRINA_2	179	8	145065178	953	CG			0	0.0909091	0.0625				0		0	0				0			0					0		0	0.0833333	0	0	0	0										0			0
GRINA_2	205	8	145065152	927	CG					0				0										0					0																				0.1
GRINA_2	228	8	145065129	904	CG					0											0			0					0																				0
GRINA_2	232	8	145065125	900	CG					0											0			0					0																				0
INSIG1_1	27	7	155089031	-450	CG	0.00123762	0.00338409	0.00458716	0.00881057	0.00844595	0	0.00195695	0.00665188	0.00252845	0.0132159	0.00420168	0.00889328	0.00459418	0.00382409	0.0028222	0.00140449	0.00147929	0.0013986	0.00395257	0.00490998	0.003367	0.00736842	0.00472441	0.00301932	0.00177305	0.00192678	0.00460123	0.00344149	0.0104762	0.00204499	0.00389864	0.00376412	0.00520833	0.00291971	0.00362319	0.00424929	0.00884956	0.00401021	0.00452233	0.00450958	0.00271186	0.00487013	0.0019084	0.00310174
INSIG1_1	51	7	155089007	-474	CG	0.00244499	0.0066335	0.0105026	0.00508721	0.00666667	0.0140056	0.00386847	0.00443459	0.0111524	0.00434153	0.00823045	0.00486855	0.00454201	0.00379507	0.00657277	0.00415512	0.0143885	0.0179063	0.00467654	0.00969305	0.00673401	0.00729167	0.0015674	0.00651659	0.00788782	0.00860421	0.0060423	0.0101991	0.0028169	0.00659229	0.00676329	0.00246609	0.00767263	0.0078853	0.00717213	0.00606343	0.0034662	0.00468131	0.00111421	0.00886918	0.00133511	0.00712025	0.00374181	0.0061237
INSIG1_1	71	7	155088987	-494	CG	0.0110159	0.00498339	0.00375094	0.00872093	0.00333333	0.0112045	0.00386847	0.00886918	0.0086741	0.00724638	0.00514933	0.0126582	0.00757002	0.00757576	0.00938967	0.0110957	0.0057554	0.0137931	0.00468384	0.0088853	0.0151515	0.00416667	0.0031348	0.0130409	0.00438596	0.00669856	0.00906344	0.00826045	0.0131455	0.00557809	0.0125604	0.0136139	0.0145051	0.00286738	0.00614754	0.00373134	0.00521739	0.0154843	0.010585	0.0160932	0.0120321	0.00949367	0.0130964	0.00857843
INSIG1_1	96	7	155088962	-519	CG	0.00367197	0.00498339	0.00750188	0.00508721	0.00833333	0.00280899	0.00774443	0.00222717	0.00248139	0.00435414	0.00515996	0.00683594	0.00984103	0.00379507	0.00751174	0.00555556	0.00577201	0.00825309	0.00625	0.00484653	0.0016835	0.00520833	0.00470219	0.00474777	0.0026362	0.0105163	0.00907716	0.00680603	0.0056338	0.00659564	0.00531401	0.0111386	0.00428082	0.00933908	0.00717213	0.00419972	0.00781929	0.00396254	0.0111483	0.00556174	0.00734803	0.00713154	0.00374181	0.00858369
INSIG1_1	119	7	155088939	-542	CG	0.0218254	0.0190996	0.0240674	0.0166256	0.0202373	0.0319635	0.0230892	0.0145719	0.0184049	0.028136	0.0260285	0.0165877	0.0266828	0.0217054	0.0215134	0.0183276	0.022673	0.0410367	0.0175219	0.0307793	0.0205198	0.0484545	0.0335052	0.0173661	0.0147493	0.03125	0.0260223	0.028332	0.027972	0.0230029	0.0241741	0.0224033	0.0231092	0.0172722	0.0259846	0.0275545	0.0101744	0.0178998	0.0258738	0.0210477	0.0265295	0.0245478	0.0222052	0.0230651
INSIG1_1	121	7	155088937	-544	CG	0.0255906	0.0322148	0.0244048	0.025563	0.0138122	0.0113122	0.0235664	0.0252708	0.0243161	0.0243902	0.0274542	0.0304687	0.0251497	0.0153846	0.0309506	0.0193843	0.0307692	0.0235546	0.0247066	0.031068	0.0148448	0.0222772	0.0192308	0.0230105	0.0175182	0.0233786	0.0293399	0.0233941	0.0177606	0.022314	0.0239139	0.0252781	0.0220994	0.0247642	0.0293881	0.0201521	0.028715	0.0171091	0.0161652	0.0156538	0.0165687	0.0237332	0.0196821	0.0279614
INSIG1_1	143	7	155088915	-566	CG	0.00588813	0.0105402	0.00764256	0.00720721	0.00478142	0.0112867	0.00541377	0.00891266	0.004004	0.00344432	0.00571895	0.0155521	0.00713012	0.0106707	0.00583942	0.00673401	0.00584112	0.0148305	0.00674433	0.00832266	0.0134409	0.00980392	0.00380711	0.0085026	0.00505051	0.0045045	0.00242424	0.00825147	0.00532725	0.0151764	0.00828729	0.00501505	0.00412088	0.0116754	0.00477897	0.00901239	0.00571021	0.00642711	0.00533333	0.0086877	0.00691122	0.00382409	0.0112275	0.00351936
INSIG1_1	148	7	155088910	-571	CG	0.0117763	0.00527704	0.00882872	0.0108173	0.0191388	0.00452489	0.0100541	0.0107335	0.014985	0.00918485	0.0278005	0.0194704	0.0172209	0.0167939	0.0131291	0.012318	0.0116959	0.0148462	0.0128598	0.0198718	0.00268456	0.0171709	0.00890585	0.00944733	0.0115191	0.0082397	0.0145103	0.00901607	0.0160061	0.0168171	0.0149901	0.0180905	0.0157967	0.0140187	0.020343	0.0232908	0.0164051	0.0113935	0.0159858	0.0105311	0.0169942	0.0209258	0.0134731	0.0110887
INSIG1_1	151	7	155088907	-574	CG	0.006917	0.00930851	0.0166568	0.0150875	0.00962199	0.00909091	0.00930954	0.016158	0.016	0.0139535	0.0157025	0.00706991	0.0113704	0.00766871	0.0146413	0.0146893	0.0105634	0.0224839	0.0130031	0.0116129	0.014885	0.00906096	0.0128866	0.0124283	0.0203488	0.0204082	0.0182482	0.0114579	0.00689127	0.00867769	0.0143198	0.00809717	0.00968858	0.012926	0.0128359	0.014756	0.0100647	0.0106038	0.0142921	0.00780174	0.00965147	0.0166453	0.0105581	0.0136917
INSIG1_1	161	7	155088897	-584	CG	0.0391198	0.0249169	0.0300075	0.0232389	0.0224439	0.0308989	0.03485	0.0111111	0.0248447	0.0130624	0.0268318	0.0303327	0.0318665	0.0304762	0.0308989	0.025	0.0331412	0.0468966	0.0226562	0.0346774	0.0185185	0.034375	0.0219436	0.0290629	0.0254833	0.0239693	0.0407855	0.0277237	0.0253283	0.021309	0.0318841	0.0372671	0.0300172	0.0287563	0.0389344	0.0265982	0.0295909	0.0216372	0.0245536	0.0183537	0.0287049	0.0190024	0.02058	0.0208717
INSIG1_1	167	7	155088891	-590	CG	0.0195599	0.00996678	0.00975976	0.010167	0.00581879	0.00561798	0.018393	0.0133929	0.00869565	0.0101449	0.0134298	0.0146771	0.0159332	0.00190476	0.0140581	0.0125	0.00864553	0.0165746	0.0171875	0.016116	0.010101	0.00834202	0.00940439	0.014828	0.0149385	0.0115053	0.0121396	0.0097229	0.0262664	0.0152284	0.00966184	0.0210918	0.00859107	0.0143678	0.0112878	0.0139991	0.0261097	0.00901226	0.0145008	0.00667408	0.018024	0.0174465	0.011257	0.0104359
INSIG1_1	173	7	155088885	-596	CG	0.00733496	0.00664452	0.00750751	0.010167	0.00749376	0.0280899	0.0135528	0.0200445	0.00248447	0.00869565	0.0154799	0.0146771	0.00758725	0.0095057	0.00562324	0.0152778	0.00432277	0.00414365	0.0132916	0.00966962	0.020202	0.00520833	0.0109718	0.00652432	0.0105448	0.0115053	0.00907716	0.0121536	0.00469043	0.00862506	0.0130435	0.0260223	0.00600343	0.0122126	0.0148718	0.00839944	0.00261097	0.0104542	0.0128277	0.00556483	0.0046729	0.0110847	0.0149953	0.0122775
INSIG1_1	190	7	155088868	-613	CG	0.0232274	0.00498339	0.014275	0.010167	0.0141549	0.00280899	0.00968054	0.0111359	0.011194	0.00724638	0.0113636	0.00587084	0.00682853	0.0266667	0.0159325	0.00834492	0.00432277	0.00827586	0.00703125	0.00645161	0.00505051	0.009375	0.00626959	0.00771513	0.0158311	0.00575264	0.00907716	0.010209	0.00562852	0.00507614	0.0101498	0.00247831	0.0111684	0.012931	0.00922131	0.00420168	0.00435161	0.00685673	0.00613497	0.00668151	0.00467602	0.0166271	0.0112465	0.00858896
INSIG1_1	195	7	155088863	-618	CG	0.00977995	0.00830565	0.0112613	0.010167	0.0041632	0.00561798	0.00968054	0.00890869	0.0136646	0.0144928	0.0113519	0.00684932	0.00151745	0.0228137	0.00562324	0.00417246	0.00432277	0.00827586	0.0078125	0.0112903	0.00673401	0.00625652	0.00783699	0.00830368	0.00966608	0.00479386	0.00907716	0.0111813	0.0131455	0.0101471	0.00724638	0.00619579	0.00943396	0.00431034	0.00768443	0.0135387	0.00696258	0.00974026	0.00668896	0.0144686	0.0133601	0.00554236	0.0149953	0.0104294
INSIG1_1	204	7	155088854	-627	CG	0.00855746	0.0149502	0.00225225	0.00653595	0.00916667	0	0.0106486	0.00668151	0.0111801	0.00869565	0.0165119	0.00978474	0.0091047	0.00570342	0.0056338	0.0111266	0.00432277	0.00275862	0.00703125	0.00967742	0.00673401	0.0177083	0.00940439	0.00533808	0.00966608	0.00671141	0.0075643	0.0106952	0.00657277	0.0101471	0.00772947	0.0086741	0.0102916	0.00718391	0.00717213	0.00560224	0.00522193	0.010101	0.00557414	0.0100167	0.00868403	0.00712589	0.0159325	0.0110429
INSIG1_1	225	7	155088833	-648	CG	0.00366748	0.00996678	0.0112613	0.0108932	0.0075	0.00840336	0.00774443	0.0111359	0.0136646	0.00289855	0.0103199	0.00684262	0.00758725	0.00760456	0.00843486	0.00416667	0.0115274	0.00689655	0.0101483	0.0104839	0.010101	0.00832466	0.00782473	0.00889152	0.00790167	0.00191755	0.0060423	0.00486145	0.0253521	0.00659229	0.00966184	0.00991326	0.0102916	0.016523	0.00870902	0.00887436	0.00348129	0.00649351	0.00668896	0.00668151	0.012024	0.00395883	0.00749064	0.00490798
INSIG1_1	236	7	155088822	-659	CG	0.0158924	0.0232945	0.0052592	0.00798838	0.0208333	0.00280112	0.00871249	0.00445434	0.00621118	0.00724638	0.00722394	0.00977517	0.0174507	0.00570342	0.0121837	0.00555556	0.0144718	0.0137931	0.0179547	0.0121065	0.00505051	0.0114464	0.0109546	0.00474215	0.00702371	0.00958773	0.0060423	0.00729217	0.014111	0.0106545	0.00869145	0.0173482	0.0077187	0.0107759	0.00768443	0.0102708	0.0121845	0.0137135	0.0150502	0.0139276	0.0113636	0.00554236	0.00655431	0.0116636
INSIG1_2	24	7	155089471	-10	CG	0.0434783	0.0163934	0	0.015873	0.0111111	0	0.0123457	0	0.0133333	0.0140845	0.0162602	0.0140845	0.0121951	0.0357143	0	0	0	0	0	0	0	0	0	0	0	0	0	0.0175439	0.0333333	0.0188679	0	0	0	0	0.0344828	0	0	0	0	0	0	0	0.0833333	0.0140845
INSIG1_2	29	7	155089466	-15	CG	0.0142857	0	0	0.0307692	0	0	0	0	0	0	0.016129	0	0.0119048	0.0357143	0.0166667	0	0	0.0188679	0	0.0181818	0.03125	0	0.0465116	0.0212766	0	0	0	0.00862069	0	0.0377358	0	0	0	0	0	0.025641	0	0.0119048	0.0212766	0	0	0	0	0.0285714
INSIG1_2	33	7	155089462	-19	CG	0	0.016129	0.0121951	0	0.010989	0	0	0	0.0266667	0	0.032	0	0	0	0	0.0106383	0	0	0.0181818	0	0.03125	0.0307692	0	0	0	0	0	0	0	0	0	0	0	0	0	0.0128205	0	0.0238095	0.0425532	0	0	0	0	0
INSIG1_2	35	7	155089460	-21	CG	0.0277778	0	0.0361446	0	0.010989	0	0.0123457	0	0	0	0	0	0.0119048	0	0.0166667	0	0	0	0	0	0	0	0.0232558	0	0	0.015873	0	0	0	0	0	0	0	0.0133333	0.0172414	0.0128205	0.0204082	0	0	0	0	0	0	0
INSIG1_2	41	7	155089454	-27	CG	0.0277778	0.016129	0	0.0153846	0	0	0	0	0.0133333	0	0	0	0.0238095	0	0.05	0.0107527	0	0	0	0	0.03125	0	0.0232558	0	0	0	0	0.00862069	0	0.0188679	0.0188679	0.0175439	0.04	0.0266667	0	0	0	0.0116279	0	0	0	0	0	0.0140845
INSIG1_2	45	7	155089450	-31	CG	0	0.0645161	0	0	0	0	0	0	0	0.0142857	0.00793651	0.0263158	0.0238095	0	0	0.0106383	0	0	0.0175439	0	0.03125	0	0.0232558	0	0.0114943	0.031746	0	0.00862069	0	0	0.0192308	0	0.04	0.0133333	0	0	0	0.0116279	0.0217391	0	0	0.0212766	0	0
INSIG1_2	49	7	155089446	-35	CG	0	0	0	0.0153846	0.0222222	0	0.0246914	0	0.0133333	0	0.024	0.0263158	0	0	0	0	0	0	0.0175439	0	0.03125	0.0147059	0.0232558	0	0	0	0.0123457	0.00877193	0	0	0.0192308	0.0172414	0	0	0	0	0	0.0116279	0.0212766	0	0	0	0	0
INSIG1_2	51	7	155089444	-37	CG	0.028169	0	0.0120482	0	0	0	0.0123457	0	0.0133333	0.0144928	0.016	0.0131579	0.0238095	0	0	0	0	0	0	0	0	0	0	0	0	0	0.0125	0.0176991	0	0	0	0	0	0.0133333	0	0.012987	0	0.0116279	0	0	0	0	0	0
INSIG1_2	64	7	155089431	-50	CG	0	0	0	0.0153846	0	0	0.0123457	0.0285714	0	0.0144928	0	0.0135135	0	0	0	0.010989	0	0	0	0	0	0.0149254	0	0	0.0116279	0	0	0.00909091	0	0	0	0	0	0	0	0	0.0208333	0	0	0	0	0	0	0.0142857
INSIG1_2	68	7	155089427	-54	CG	0	0	0	0.03125	0.0337079	0.0454545	0.037037	0	0.0135135	0	0.008	0.0266667	0	0	0	0.0108696	0.037037	0	0	0	0	0	0	0	0.0235294	0	0.025	0.00917431	0	0	0.02	0	0	0	0.0181818	0.025974	0	0	0.0212766	0	0.037037	0	0	0.0285714
INSIG1_2	85	7	155089410	-71	CG	0.0142857	0	0	0	0	0	0.0123457	0	0	0.0147059	0	0.0133333	0	0	0	0.0108696	0	0.0192308	0	0	0.030303	0	0.0232558	0	0.0116279	0	0.0125	0	0.08	0	0	0.0175439	0	0	0	0.038961	0	0.0114943	0	0	0	0	0	0
INSIG1_2	88	7	155089407	-74	CG	0.0285714	0.0163934	0	0.0307692	0	0	0	0.0285714	0.04	0.0147059	0.015873	0	0	0	0.0169492	0	0	0	0	0	0	0	0	0	0	0	0.0125	0	0.04	0	0	0	0	0	0	0	0.0208333	0.0229885	0	0.0416667	0	0	0	0
INSIG1_2	100	7	155089395	-86	CG	0.0208333	0.0131579	0	0.0121951	0	0	0.0454545	0	0.0416667	0.0114943	0.0116959	0	0.00970874	0.0285714	0.0238095	0	0	0.030303	0	0	0	0	0	0.0338983	0	0	0.0277778	0	0	0	0	0	0	0.0215054	0	0.0196078	0	0	0	0	0	0	0	0.0106383
INSIG1_2	104	7	155089391	-90	CG/rs541020266	0.0306122	0	0.0185185	0.0119048	0.0275229	0	0.0178571	0	0	0.0105263	0.0228571	0.0531915	0.0377358	0.0285714	0.0352941	0.018018	0	0.0447761	0.027027	0.027027	0.0222222	0.0116279	0.0491803	0	0.0188679	0.0114943	0.0263158	0.0136054	0	0	0	0.0138889	0	0.0625	0	0.00952381	0.0169492	0.00806452	0.0545455	0.0666667	0	0.0357143	0	0.0212766
INSIG1_2	110	7	155089385	-96	CG	0.020202	0.0384615	0	0.0117647	0	0	0.0172414	0	0	0.0104167	0.00564972	0.0104167	0	0.0277778	0	0.018018	0.0285714	0.0144928	0	0.0131579	0	0	0.0163934	0.0153846	0.0185185	0.0227273	0.017094	0.033557	0	0.0136986	0.0277778	0.0136986	0	0	0	0	0	0.0241935	0	0.0322581	0	0	0	0
INSIG1_2	116	7	155089379	-102	CG	0.040404	0	0.00917431	0.0235294	0.0265487	0	0.00862069	0	0.0291262	0.0206186	0.00564972	0.0104167	0	0	0.0116279	0.018018	0	0.0144928	0	0.0394737	0	0	0.0163934	0.0153846	0.0275229	0.0113636	0.017094	0.0134228	0	0.027027	0.0833333	0.0136986	0	0.0309278	0.0253165	0.0188679	0	0.024	0	0.0645161	0	0	0.0714286	0
INSIG1_2	119	7	155089376	-105	CG	0.0505051	0	0.00917431	0.0117647	0.0353982	0	0.0344828	0	0.0194175	0.0309278	0.0225989	0.0208333	0.0275229	0	0.0232558	0.027027	0.0285714	0	0	0.0131579	0	0.0116279	0.0327869	0.0153846	0.0183486	0.0340909	0.017094	0.0337838	0	0.0405405	0	0.0136986	0	0.0206186	0.0126582	0.0186916	0	0.016	0.0172414	0.03125	0.0294118	0.0350877	0	0.0319149
INSIG1_2	124	7	155089371	-110	CG	0.0606061	0	0	0.0235294	0.0176991	0.0714286	0.0172414	0.0238095	0.00970874	0.0103093	0.00564972	0.0520833	0.0183486	0.0277778	0.0116279	0.027027	0	0.0869565	0.0133333	0	0.0666667	0.0114943	0.0163934	0.0307692	0	0.0337079	0	0.0268456	0	0.027027	0.0416667	0.0136986	0	0.0309278	0.0126582	0.0373832	0.0169492	0.008	0.0344828	0.030303	0.0285714	0.0701754	0	0.0106383
INSIG1_2	126	7	155089369	-112	CG	0.040404	0.0128205	0.037037	0.0352941	0.0176991	0.0357143	0.0258621	0.0238095	0	0.0206186	0.0338983	0	0	0.0277778	0	0.018018	0.0571429	0	0.0266667	0.025974	0.0222222	0	0.0163934	0	0.00917431	0.011236	0.0338983	0.0133333	0.03125	0	0.0138889	0.0273973	0	0	0	0.0186916	0	0.0241935	0.103448	0.030303	0.0285714	0	0	0.0638298
INSIG1_2	128	7	155089367	-114	CG	0.020202	0.025641	0.0366972	0.0823529	0.0265487	0	0.0172414	0	0	0.0618557	0.0340909	0.03125	0.0275229	0.0833333	0.0465116	0.018018	0	0.0428571	0.0133333	0.0779221	0.0444444	0	0.0491803	0	0.0183486	0.011236	0.0169492	0.02	0	0	0.0416667	0.0273973	0.0333333	0.0309278	0.0506329	0.0373832	0.0508475	0.0241935	0.0517241	0.0909091	0	0	0	0.0212766
INSIG1_2	134	7	155089361	-120	CG	0.010101	0	0.00917431	0	0.00884956	0.0357143	0.00862069	0	0.0194175	0.0515464	0.0170455	0	0.00917431	0	0	0	0.0285714	0	0	0.012987	0.0227273	0.0229885	0	0	0.0366972	0.011236	0.00847458	0.02	0	0.0136986	0	0	0	0.0206186	0	0.00934579	0.0169492	0.00806452	0	0	0.0285714	0	0	0.0322581
INSIG1_2	138	7	155089357	-124	CG	0.040404	0.0128205	0.0275229	0.0470588	0.00877193	0	0.0517241	0	0.0194175	0.0515464	0.0227273	0.0208333	0.0275229	0.0277778	0.0348837	0.00900901	0	0.0428571	0	0.025974	0	0.0114943	0.0163934	0.0461538	0.0275229	0.0337079	0.0423729	0.0604027	0	0.0540541	0.0833333	0.0136986	0	0.0103093	0.0632911	0	0.0169492	0.0322581	0	0.0606061	0	0.0175439	0	0.0107527
INSIG1_2	147	7	155089348	-133	CG	0.020202	0	0.0183486	0	0	0	0.00862069	0.0232558	0.0294118	0	0.0113636	0.0103093	0.00934579	0	0.0116279	0	0.0285714	0.0142857	0.0133333	0	0	0	0.0163934	0.0153846	0.0181818	0	0.00854701	0.00666667	0.030303	0	0	0.0136986	0	0	0.0126582	0.00934579	0	0.016	0.0172414	0	0.0285714	0	0	0.0322581
INSIG1_2	152	7	155089343	-138	CG	0.0136986	0.0491803	0	0.03125	0.021978	0.0434783	0.0512821	0	0	0.0289855	0.00793651	0.025	0.0121951	0	0	0.032967	0	0	0.0166667	0	0	0.0144928	0.0232558	0	0	0	0.0123457	0.00909091	0	0	0.0204082	0.0363636	0	0	0.0178571	0.025	0.0208333	0.021978	0	0.04	0.037037	0.0217391	0	0.0298507
INSIG1_2	159	7	155089336	-145	CG	0	0.0327869	0.0120482	0.0307692	0.0340909	0	0.025641	0.0857143	0.027027	0	0.0487805	0.0266667	0.0361446	0	0.0166667	0.0217391	0	0.0566038	0	0.0535714	0.03125	0	0.0227273	0	0	0.0163934	0.0123457	0.0366972	0.0384615	0.0192308	0.0204082	0.0181818	0	0.0135135	0.0178571	0.012987	0.0204082	0.0229885	0.0222222	0.115385	0	0.0217391	0	0.0447761
INSIG1_2	164	7	155089331	-150	CG	0.0140845	0.0819672	0.0240964	0.0153846	0.0224719	0	0.0641026	0	0.0405405	0.0294118	0.0162602	0.0133333	0.0361446	0.0689655	0.05	0.0217391	0.037037	0	0.0338983	0.0357143	0	0.0289855	0.0681818	0.0217391	0.0117647	0.05	0.037037	0.0366972	0	0.02	0	0.0181818	0	0.0135135	0	0.0128205	0.0408163	0.0344828	0.0444444	0.0384615	0.037037	0.0227273	0	0.0447761
INSIG1_2	166	7	155089329	-152	CG	0.0140845	0.0163934	0.0481928	0.0153846	0.0449438	0	0.012987	0	0	0.0441176	0.0162602	0	0.0361446	0	0.0166667	0.0108696	0	0.0192308	0.0338983	0.0357143	0	0	0	0.0217391	0.0348837	0.0491803	0.0246914	0.00917431	0	0	0	0.0181818	0	0.0135135	0	0.0128205	0.0204082	0.0114943	0	0.0384615	0.037037	0.0888889	0	0
INSIG1_2	171	7	155089324	-157	CG	0.0140845	0.0163934	0.0120482	0.0153846	0.0222222	0	0.0128205	0.0571429	0.0133333	0	0.00813008	0.04	0.0240964	0	0.0333333	0	0.0357143	0.0576923	0	0	0.03125	0.0144928	0.0227273	0	0	0.0327869	0.037037	0	0	0	0	0	0	0	0	0	0.0208333	0	0.0222222	0	0	0	0	0.0151515
INSIG1_2	177	7	155089318	-163	CG	0	0	0.0120482	0.0153846	0.021978	0	0	0	0	0.0147059	0.00813008	0	0.0361446	0	0.0166667	0.0108696	0	0	0	0.0181818	0.0625	0.0289855	0	0	0.0117647	0	0.0123457	0.00917431	0	0	0.0204082	0.0363636	0	0.0405405	0	0.0128205	0	0.0232558	0	0.0384615	0.037037	0	0	0.0151515
INSIG1_2	184	7	155089311	-170	CG	0.084507	0.0983607	0.0365854	0.0461538	0.0555556	0.0909091	0.025641	0.0588235	0.0533333	0.0294118	0.0406504	0.0945946	0.0481928	0.03125	0.0333333	0.0978261	0	0.0576923	0.103448	0	0.03125	0	0.0232558	0.130435	0.0714286	0.0833333	0.05	0.0733945	0.04	0	0.0612245	0.0909091	0.08	0.0405405	0.0535714	0.115385	0.0425532	0.0232558	0.0444444	0.16	0.0384615	0.0666667	0	0.0454545
INSIG1_2	186	7	155089309	-172	CG	0	0	0	0	0.0222222	0	0	0	0	0.0294118	0	0.0135135	0	0.03125	0.0163934	0	0.0357143	0	0	0	0.03125	0.0289855	0	0	0.0235294	0.0163934	0.037037	0.0366972	0.0384615	0	0	0	0	0.0675676	0	0.025641	0.0208333	0.0232558	0	0	0	0	0	0
INSIG1_2	192	7	155089303	-178	CG	0.0140845	0	0.0120482	0	0.011236	0	0	0	0	0.0147059	0.0243902	0	0	0	0.0163934	0.010989	0	0.0188679	0	0	0.0625	0.0144928	0.0232558	0.0217391	0.0119048	0	0.025	0	0.04	0	0	0.0181818	0	0.027027	0	0.0128205	0	0	0	0	0	0.0444444	0	0.0298507
INSIG1_2	196	7	155089299	-182	CG	0.0140845	0.0163934	0.0120482	0	0.011236	0.0454545	0.0126582	0.0571429	0.0133333	0.0144928	0.0162602	0	0	0.0322581	0.0163934	0.0111111	0	0	0.0175439	0.0181818	0.03125	0.0144928	0.0697674	0	0	0	0.025	0.00917431	0	0	0.0204082	0	0	0.0135135	0	0.0384615	0	0.0116279	0.0217391	0	0.037037	0	0	0.0149254
INSIG1_2	206	7	155089289	-192	CG	0	0.015873	0.0117647	0.0153846	0.0111111	0	0.0126582	0	0.0135135	0.0142857	0.015748	0	0.0120482	0	0.0333333	0.0111111	0	0	0	0	0	0	0.0232558	0	0.0119048	0.0483871	0	0.0272727	0.0333333	0	0	0.0178571	0	0	0	0.012987	0	0	0	0	0	0	0	0.0294118
INSIG1_2	212	7	155089283	-198	CG	0.0138889	0	0	0	0.0222222	0	0	0.027027	0	0.0138889	0.00787402	0.027027	0	0	0	0.0111111	0	0	0	0.0344828	0.030303	0	0	0	0.0238095	0.015873	0	0.0181818	0	0	0.0192308	0	0	0	0.0357143	0	0.0208333	0.0222222	0	0	0	0	0	0.0147059
INSIG1_2	220	7	155089275	-206	CG	0.0138889	0.015625	0	0	0	0.0454545	0	0	0	0	0.015748	0.0135135	0.0481928	0	0	0.011236	0.037037	0.0175439	0.0163934	0.0172414	0	0	0	0.0425532	0	0	0.0120482	0.00909091	0	0	0	0	0	0	0.0181818	0.038961	0	0.0222222	0	0	0	0	0	0.0447761
INSIG1_2	224	7	155089271	-210	CG	0	0	0	0	0.011236	0	0.0253165	0	0	0	0	0.0135135	0.0120482	0	0	0.0224719	0	0	0.0166667	0	0	0	0	0.0652174	0	0.031746	0.060241	0.0181818	0	0.0204082	0	0.0357143	0	0	0	0.0263158	0	0	0	0	0	0.0444444	0	0
INSIG1_3	28	7	155090118	637	CG	0.0023166	0.00862813	0.0134855	0.00357143	0.0125578	0.00424628	0.0122888	0.00965517	0.011396	0.00723473	0.00774194	0.0112518	0.00666173	0.00742312	0.00766017	0.0124451	0.00604491	0.00561798	0.00803506	0.00706215	0.00755287	0.0137255	0.00886525	0.003663	0.00495751	0.00708592	0.0123967	0.0132653	0.00935374	0.0158932	0.0228887	0.00414938	0	0.0240964	0.0162369	0.0130261	0.00713267	0.00555997	0.00550661	0.00945017	0.00459418	0.013009	0.010219	0.00499376
INSIG1_3	34	7	155090124	643	CG	0.00540541	0.00862813	0.0124224	0.00534759	0.00990753	0.00424628	0.00690184	0.00688705	0.0104364	0.00561798	0.00902062	0.00421644	0.00444115	0.00848356	0.00418118	0.00438596	0.00258621	0.0064154	0.00437318	0.00211864	0.0120664	0.00391007	0	0.00457875	0.00637394	0.00442087	0.00294985	0.00917431	0.00848176	0.00763359	0.00551615	0.0145379	0.0145985	0	0.00667302	0.003003	0.00713267	0.00871632	0.00550661	0.00343643	0.0114767	0.0113058	0.00510949	0.00809465
INSIG1_3	51	7	155090141	660	CG	0.0108192	0.00259291	0.00518672	0.00356189	0.00528053	0	0.00460829	0.00275103	0.00474834	0.0120385	0.00966495	0.00632467	0.0074239	0.00635593	0.00556715	0.0124269	0.00344234	0.00481541	0.00218659	0.00212615	0.00150602	0	0.00705467	0.00731261	0.004954	0.00176991	0.00648968	0.00814249	0.00510638	0.00824873	0.00630915	0.00311203	0.0217786	0.00133869	0.00380228	0.002002	0.0042735	0.00474684	0.0154015	0.00257511	0.00535988	0.00282486	0.00656934	0.00811486
INSIG1_3	58	7	155090148	667	CG	0.00154321	0.00172563	0.0155763	0.00267618	0.00462046	0.0106383	0.00615385	0.0137552	0.00664767	0.00321543	0.00773694	0.00633357	0.00594354	0.00106045	0.00837404	0.00146199	0.00517241	0.0120579	0.00510949	0.0106383	0.0135338	0.00585938	0.010582	0.00274474	0.00353357	0.00708592	0.00413223	0.0086558	0.0119149	0.00190235	0.0055205	0.00311203	0.00362319	0.00401606	0.0038059	0.013	0.00285307	0.00713154	0.00660066	0.0128645	0.00535988	0.0079096	0.00292398	0.00498753
INSIG1_3	66	7	155090156	675	CG	0.00462606	0.00344531	0.0134855	0.00267618	0.00791557	0	0.00538462	0.00826446	0.0113852	0.00481928	0.00774693	0.00211119	0.00668648	0.00529661	0.00558659	0.00656934	0.00689061	0.00723473	0.00510576	0.00923295	0.00902256	0.00584795	0.00353357	0.00457038	0.00707214	0.0106195	0.00413223	0.0076297	0.00680851	0.0145662	0.0126382	0	0.0234657	0.0146667	0.00381316	0.0159363	0.00572246	0.0110935	0.0231278	0.00514139	0.0168324	0.0107284	0.0116959	0.00437227
INSIG1_3	70	7	155090160	679	CG	0.00811908	0.00539291	0.00274223	0.00930954	0.00348837	0.00753296	0.00802139	0	0.00421585	0.00568586	0.00454804	0.0102657	0.00324044	0.00938967	0.00364964	0.00711514	0.00382848	0.00687758	0.00511836	0.0116137	0.00519481	0.00168209	0.00792393	0.0121951	0.0112994	0.0039185	0.00573215	0.0122616	0.00374251	0.00556483	0.00275292	0.00820419	0	0.0118906	0.00413223	0.0156658	0.0140845	0.0146956	0.00287081	0.00450113	0.0026936	0.00442696	0.00641849	0.00821918
INSIG1_3	79	7	155090169	688	CG	0.00845254	0.0145455	0.00789474	0.00521221	0.00888889	0.0126582	0.0133929	0.00928074	0.00652529	0.0129164	0.00924415	0.00637312	0.00564617	0.00453309	0.0092219	0.0106117	0.0145666	0.0105332	0.00860479	0.0123023	0.0161692	0.0113086	0.00460123	0.00855365	0.014979	0.0126019	0.00839092	0.0116984	0.00654545	0.00478215	0.00920447	0.0214592	0.0137615	0.00918485	0.0119142	0.0108787	0.00972053	0.0105402	0.0285978	0.00215672	0.0109607	0.0108134	0.00788357	0.0153115
INSIG1_3	81	7	155090171	690	CG	0.0103896	0.0145349	0.00960699	0.0126582	0.0088741	0.00542495	0.0140306	0.00812065	0.0105863	0.00678426	0.0190114	0.0144509	0.0144201	0.0108499	0.0126728	0.0193267	0.0131004	0.0104987	0.0147059	0.00994152	0.0111801	0.0152733	0.0168453	0.0139535	0.0041841	0.0126019	0.0182176	0.00908698	0.0145243	0.0111406	0.0137615	0.0137457	0.0137195	0.0103093	0.00711462	0.0100334	0.00849515	0.0118421	0.0119816	0.0186514	0.00966495	0.00892019	0.0145366	0.0142255
INSIG1_3	92	7	155090182	701	CG	0.0155642	0.0123547	0.0148213	0.0163812	0.0116343	0.00361664	0.0114796	0.0232019	0.0130293	0.0149254	0.0162866	0.0179294	0.0131579	0.00904977	0.016129	0.0155666	0.0218182	0.0131062	0.0159314	0.0146284	0.0124069	0.0185185	0.0214067	0.0147059	0.0287253	0.0118606	0.0300197	0.0147059	0.00725163	0.00636605	0.0091683	0.0257732	0.00455927	0.0206659	0.0205371	0.0142022	0.0121359	0.00921053	0.0193548	0.0172043	0.0315518	0.0121894	0.0266667	0.0215903
INSIG1_3	102	7	155090192	711	CG	0.00972763	0.0065407	0.00609756	0.00893522	0.0132964	0.0198915	0.0178458	0.0115741	0.00814996	0.00814111	0.0113945	0.00751011	0.0093985	0.00723327	0.0184014	0.0143213	0.0116364	0.00981675	0.011635	0.0134503	0.00496894	0.0185036	0.00611621	0.00697674	0.0161387	0.00888889	0.011811	0.00908304	0.00797679	0.0175159	0.00851343	0.00945017	0.00911854	0.0126002	0.00790514	0.0125418	0.0109356	0.00723684	0.00829493	0.0114943	0.0083709	0.010788	0.015748	0.0105319
INSIG1_3	109	7	155090199	718	CG	0.0103761	0.0065407	0.00958188	0.0178704	0.0105263	0.00724638	0.0133843	0.00580046	0.00732899	0.0115332	0.00813449	0.0127094	0.00751409	0.0190045	0.0115009	0.00809465	0.0116448	0.013089	0.0110159	0.0122807	0.021118	0.00804505	0.0122324	0.0147173	0.0113568	0.0162963	0.0137795	0.00692341	0.012436	0.00902815	0.00982318	0.0154639	0.0242792	0.0045819	0.00474308	0.00918964	0.0254854	0.00526316	0.0110599	0.0215517	0.0160979	0.0126582	0.00484555	0.0126382
INSIG1_3	115	7	155090205	724	CG	0.00518807	0.0116364	0.00610288	0.00893522	0.00443213	0.00361664	0.0108349	0.00115741	0.00814332	0.00677966	0.00759631	0.00578704	0.00312891	0.00180995	0.00460299	0.00373832	0.0101818	0.00654879	0.00305998	0.0116959	0.00621891	0.010467	0.0030581	0.00309837	0.00896593	0.00296296	0.00442913	0.0129758	0.00290065	0.0063762	0.0091683	0.00171674	0.0273556	0.0160367	0.007109	0.00083612	0.0036452	0.00329164	0.0119816	0.00359195	0.00965873	0.00562588	0.00545124	0.00579557
INSIG1_3	121	7	155090211	730	CG	0.00518807	0.008	0.0113339	0.00744602	0.0127424	0.00723327	0.0102041	0.0104287	0.0130187	0.00746269	0.0135575	0.0150202	0.0100188	0.0271493	0.0143761	0.00934579	0.008	0.0170269	0.00611995	0.0151958	0.00993789	0.00402253	0.0198777	0.00929512	0.00597729	0.00814815	0.0113189	0.00692042	0.00435098	0.010627	0.0039267	0.0137339	0.0304414	0.0148912	0.00632411	0.0100334	0.00363636	0.00592495	0.0119816	0.0122126	0.00708307	0.010788	0.00666667	0.00684932
INSIG1_3	152	7	155090242	761	CG	0.0173716	0.0135939	0.00615385	0.0122807	0.00913838	0.0041841	0.0173847	0.00945946	0.0185874	0.0292259	0.0204212	0.0172771	0.0316642	0.016684	0.0233516	0.0266379	0.0152931	0.0159236	0.0122039	0.00905292	0.0209581	0	0.00526316	0.0126927	0.022176	0.0113636	0.0127021	0.00848303	0.0025	0.00809969	0.0101089	0.0153531	0.0140598	0.0091623	0.0141911	0.0207101	0.0266106	0.0187062	0.0110011	0.0150376	0.00602864	0.0138274	0.015816	0.00923645
INSIG1_3	172	7	155090262	781	CG	0.00540958	0.00693241	0.0104603	0.0080573	0.00331565	0.0128205	0.00696594	0.00552486	0.00666667	0.0161421	0.0142211	0.0092068	0.00750188	0.017094	0.00701262	0.00366569	0.00432526	0.00569106	0.0095518	0.0106762	0.0091047	0.00884956	0.0124777	0.00738007	0.00921986	0.0035524	0.00828893	0.00764916	0.00427716	0.00761905	0.0165877	0.00627615	0.0127273	0.0080429	0.00862895	0.0201207	0.0271041	0.00475813	0.00332594	0.0128866	0.0115031	0.00565291	0.0175953	0.00876644
INSIG1_3	183	7	155090273	792	CG	0.00309358	0.0138648	0.0115183	0.0080573	0.0066357	0	0.0100619	0.00690608	0.00952381	0.00484262	0.00711514	0.0042523	0.00524738	0.0106724	0.0112123	0.00807043	0.0017316	0.00894309	0.0102941	0.00712251	0.00304414	0.00393314	0.00534759	0.010157	0.0113636	0.0151111	0.00473653	0.0107198	0.0102564	0.00698413	0.0142292	0.0135841	0.00363636	0.00536193	0.00576369	0.00201207	0.00285307	0.0118953	0.00885936	0.0154639	0.00383142	0.00736544	0.0058651	0.00940439
INSIG2_	28	2	118846072	79	CG			0	0	0						0		0				0		0					0				0			0
INSIG2_	40	2	118846084	91	CG	0.0833333	0	0.166667	0.0666667	0.21875		0.0769231				0.108108	0	0.0454545				0.0416667		0.0769231	0				0	0.166667	0.0909091	0.181818	0.206897			0.333333											0
INSIG2_	63	2	118846107	114	CG	0.111111	0	0.0625	0.047619	0.0714286		0.0952381	0.153846		0.0769231	0.0545455	0.214286	0.0689655	0		0.0769231	0.0285714		0.0833333	0.0769231				0	0.133333	0	0.1875	0.05		0.2	0.1	0.0666667						0.142857				0.0714286	0.0666667	0.181818
INSIG2_	69	2	118846113	120	CG	0.111111	0	0.09375	0.190476	0		0	0.0714286		0	0.0925926	0	0.0344828	0.0714286		0.230769	0.0857143		0.0416667	0.142857				0.0285714	0.0666667	0.0625	0.117647	0.025641		0	0.05	0	0					0.0769231				0.0714286	0	0.0909091
INSIG2_	91	2	118846135	142	CG	0	0	0	0	0.0377358		0.0294118	0.0555556	0	0	0.030303	0.0434783	0.05	0.047619	0	0	0	0	0	0.0555556		0		0.0434783	0	0	0	0	0.0714286	0	0	0	0	0	0	0	0	0.0740741	0	0	0	0	0	0.05
INSIG2_	94	2	118846138	145	CG	0	0	0	0.103448	0		0	0	0	0	0	0	0	0	0	0	0	0	0	0		0		0	0	0	0	0	0	0	0	0	0	0.133333	0	0	0	0	0	0	0	0	0	0
INSIG2_	99	2	118846143	150	CG	0	0	0	0	0		0	0	0	0	0.0151515	0	0	0	0	0	0	0	0	0		0		0	0	0	0	0	0	0	0	0	0	0	0	0	0	0	0	0	0	0	0	0
INSIG2_	101	2	118846145	152	CG	0	0.117647	0	0	0		0	0		0	0.0181818	0	0	0		0	0.0285714	0	0	0				0	0	0	0	0		0	0.0526316	0						0	0			0	0	0
INSIG2_	108	2	118846152	159	CG	0	0	0	0.0454545	0		0	0		0	0	0	0	0		0	0	0	0	0				0	0	0	0	0.0465116		0	0	0						0	0			0	0	0
INSIG2_	125	2	118846169	176	CG	0	0	0	0	0		0	0		0	0	0	0.0357143	0		0	0	0	0	0				0	0	0	0.5625	0			0	0						0.0833333				0.230769	0	0
MBTPS1_1	29	16	84150906	-358	CG	0.00853485	0.0168919	0.0139303	0.0107527	0.00334448	0.00862069	0.00692384	0.0119048	0.0155642	0.0148936	0.0130112	0.00972222	0.0135501	0	0	0.00593472	0.00232019	0.0162602	0.0122066	0.00371402	0.00549451	0.00239808	0.00364964	0.0105708	0.0159091	0.0107015	0.00767263	0.0180055	0.00721501	0.00981294	0.011976	0.01341	0.0240137	0.00745342	0.012828	0.0168722	0.0125673	0.0120056	0.0125661	0.00795545	0.00752909	0.0127389	0.00700525	0.00782473
MBTPS1_1	33	16	84150902	-354	CG	0.11522	0.0945946	0.121032	0.140709	0.115684	0.142857	0.0870425	0.080597	0.0875486	0.0595745	0.112454	0.102778	0.11502	0.122581	0.0819672	0.143917	0.12297	0.112195	0.121127	0.113173	0.0824176	0.19378	0.0693431	0.0824524	0.129545	0.115339	0.117347	0.121884	0.105339	0.110362	0.138155	0.0938697	0.139693	0.0881988	0.118367	0.143135	0.136445	0.0995763	0.126323	0.106518	0.109514	0.123012	0.162587	0.109081
MBTPS1_1	48	16	84150887	-339	CG	0.0305273	0.0286976	0.0381526	0.0303672	0.0323795	0.0420168	0.0294683	0.0379242	0.030343	0.0329513	0.0425659	0.0294931	0.0279965	0.035865	0.0331906	0.0337187	0.0415385	0.0281543	0.0230817	0.0393224	0.037234	0.0423862	0.0264423	0.0337401	0.0351682	0.0306513	0.0388514	0.0307072	0.0320078	0.0313837	0.0321192	0.0302632	0.0264064	0.0375	0.0299697	0.0306034	0.0241546	0.0288894	0.0317741	0.0279871	0.0284444	0.0335235	0.0185615	0.0357143
MBTPS1_1	53	16	84150882	-334	CG	0.0432152	0.0404858	0.0314427	0.0436219	0.0376153	0.0343008	0.0426288	0.0375235	0.0384615	0.043364	0.0406321	0.0383609	0.0372771	0.0421687	0.0393314	0.0288548	0.0275362	0.0389484	0.0409596	0.042577	0.046281	0.0467153	0.0416198	0.0406667	0.0357654	0.0476529	0.0407524	0.0342924	0.0410584	0.035503	0.0421705	0.0379902	0.0613108	0.0289742	0.0377558	0.0353228	0.0280584	0.0356268	0.0406738	0.0378215	0.0390852	0.0474282	0.0325733	0.0383747
MBTPS1_1	56	16	84150879	-331	CG	0.0375747	0.0604839	0.0506406	0.0498034	0.0394366	0.0626632	0.057478	0.0388889	0.0365998	0.0389105	0.0435025	0.040378	0.0491143	0.0318725	0.0658277	0.0428571	0.0342368	0.0376812	0.0420507	0.0525733	0.0424837	0.0531609	0.0266075	0.0447368	0.0317572	0.047619	0.0482866	0.0388377	0.031617	0.0405814	0.0420245	0.0423216	0.0389474	0.0324826	0.0350087	0.0412826	0.0334076	0.0393493	0.0511987	0.0319361	0.0510708	0.0421885	0.0491453	0.034802
MBTPS1_1	67	16	84150868	-320	CG	0.0333049	0.0423387	0.0420988	0.0419672	0.0310515	0.0391645	0.0416667	0.0369686	0.0401891	0.025974	0.0368098	0.0317869	0.0516129	0.0258964	0.0339147	0.0366399	0.0242511	0.0338164	0.0247696	0.0426357	0.0344262	0.0301724	0.0332594	0.0315997	0.0268741	0.0511921	0.0357698	0.0333333	0.0315884	0.0330126	0.0380018	0.0326481	0.0421496	0.0534469	0.0319001	0.0393258	0.0333333	0.029011	0.0369768	0.0339321	0.0448929	0.036915	0.0373932	0.0332056
MBTPS1_1	90	16	84150845	-297	CG	0.0213493	0.030303	0.017094	0.0249344	0.0225989	0.013089	0.0258216	0.0147874	0.0177725	0.0207792	0.0240223	0.0180723	0.0250202	0.0239521	0.0320388	0.0330948	0.0114123	0.0289575	0.0218894	0.0216186	0.0295567	0.0115274	0.0243902	0.0184575	0.0112994	0.0260014	0.0343214	0.024734	0.0162455	0.0243304	0.0134845	0.0145808	0.0136986	0.0232019	0.0176838	0.0204573	0.0155556	0.0171617	0.0227735	0.0284858	0.0131904	0.0197759	0.012848	0.0214126
MBTPS1_1	92	16	84150843	-295	CG	0.0273271	0.0403226	0.028676	0.0236376	0.0261299	0.013089	0.0317087	0.0221811	0.0212766	0.0311688	0.0234244	0.0292347	0.0354553	0.011976	0.0417071	0.0205541	0.0199715	0.0299228	0.0236175	0.0260244	0.0262726	0.018732	0.0266075	0.0223831	0.0211864	0.0273684	0.0279938	0.0270193	0.032491	0.027542	0.0251225	0.025393	0.0305585	0.0177881	0.0249653	0.0332932	0.0233333	0.0299033	0.0288501	0.0284431	0.0271941	0.0296443	0.0192308	0.0223499
MBTPS1_1	94	16	84150841	-293	CG	0.0239112	0.0201613	0.0274725	0.0262467	0.0162429	0.0235602	0.0269953	0.0166359	0.034279	0.0246753	0.0312326	0.0171821	0.0507655	0.0159681	0.0329777	0.0223414	0.0228245	0.0183398	0.0201613	0.0310078	0.0213115	0.0201439	0.0432373	0.0368664	0.0360169	0.0357895	0.0296412	0.0255894	0.0135379	0.0207469	0.0309436	0.0241838	0.052687	0.0232019	0.0301769	0.0176494	0.0277778	0.0226423	0.026412	0.0194708	0.0251236	0.030363	0.0277778	0.0201278
MBTPS1_1	101	16	84150834	-286	CG	0.0213493	0.0241935	0.0250153	0.0131234	0.0169492	0.0183727	0.023488	0.0240296	0.0283688	0.0285714	0.0301171	0.0137575	0.0265915	0.0219561	0.0252182	0.0214477	0.0256776	0.027027	0.0195853	0.0166113	0.0163934	0.0201729	0.0210643	0.0164582	0.0155367	0.0238764	0.017134	0.0204082	0.0207581	0.0271544	0.0199142	0.0205562	0.0232068	0.0154679	0.0305238	0.0316887	0.00888889	0.0248406	0.0211296	0.0219561	0.0234761	0.0342556	0.0128205	0.0201214
MBTPS1_1	112	16	84150823	-275	CG	0.00170794	0.00403226	0.00793167	0.00459318	0.00706215	0.0209424	0.00528479	0.00554529	0.014218	0.00259403	0.00780814	0.00773196	0.00483481	0	0.00970874	0.0080429	0.0042796	0.00965251	0.0115207	0.00720222	0.0131148	0.00720461	0.00997783	0.00988142	0.00847458	0.00842697	0.00310559	0.00747556	0.00451264	0.00622289	0.00582108	0.00604595	0.0116034	0.00232019	0.00971211	0.00883179	0.00555556	0.00923483	0.00691057	0.010978	0.00947282	0.0085639	0.00641026	0.00447284
MBTPS1_1	132	16	84150803	-255	CG	0.0204953	0.0362903	0.0103722	0.0242782	0.0155148	0.0287206	0.0270112	0.0166052	0.0070922	0.00648508	0.0183946	0.0137575	0.0257857	0	0.0203686	0.0196429	0.021398	0.0318533	0.015553	0.0171936	0.0245902	0.0474138	0.00775194	0.036208	0.00706215	0.0140449	0.0218069	0.0221328	0.0370036	0.0258344	0.0232843	0.0290206	0.0105485	0.0146945	0.0183836	0.0172414	0.0244444	0.0171504	0.030463	0.0149775	0.0209877	0.0283267	0.0566239	0.0207601
MBTPS1_1	134	16	84150801	-253	CG	0.0136869	0.0100806	0.0183038	0.015748	0.0218618	0.0052356	0.0152851	0.0110701	0.0271868	0.0168612	0.016174	0.0318417	0.0136986	0.011976	0.015534	0.0178571	0.0100143	0.0299228	0.0126728	0.0227399	0.0147541	0.0158046	0.0110865	0.0223831	0.0317797	0.0196629	0.0124224	0.0207075	0.0225632	0.0190494	0.0140931	0.0217654	0.0116034	0.0108275	0.0128383	0.0172483	0.00777778	0.00769569	0.0219423	0.0249626	0.0197612	0.00592885	0.0160256	0.0220588
MBTPS1_1	151	16	84150784	-236	CG	0.0058873	0.00557621	0.00363416	0.00647249	0.00140548	0.00486618	0.00348837	0	0.00341686	0.00997506	0.00949721	0.00337553	0.00634921	0	0.00386473	0.00534283	0.00136612	0.00384246	0.00688073	0.00889878	0.00944882	0.00129702	0	0.00639386	0.00207326	0.00818554	0.00442478	0.00552486	0.0017762	0.00421537	0.00492914	0.00684932	0.00704935	0.00527108	0.00310988	0.00317586	0.00529661	0.00420913	0.00730223	0.00248139	0.00415455	0.00395778	0.00209205	0.00486539
MBTPS1_2	30	16	84150102	446	CG	0.0198864	0.0145228	0.0085034	0.0141011	0.0152454	0.0157895	0.014433	0.0138018	0.0153846	0.0143781	0.0149142	0.0103761	0.0104022	0.0142857		0.014454	0.0398734	0.0108865	0.0177557	0.0185185	0.0163934	0.00754006	0.0183993	0.0121786	0.0133571	0.0201049	0.0141116	0.0274592	0.0284091	0.01507	0.0180227	0.01983	0.0165975	0.0149813	0.0095339	0.0181159	0.015544	0.0290758	0.0107198	0.0182927	0.0107914	0.0212121	0.025463	0.011599
MBTPS1_2	48	16	84150084	464	CG	0.022871	0.0239521	0.00851466	0.0143139	0.0225624	0.0324074	0.0291595	0.0218978	0.0205656	0.0159021	0.0172576	0.0140541	0.0343823	0.0207317		0.0205479	0.0152838	0.0133929	0.0227273	0.0198183	0.0104348	0.00950119	0.0191278	0.0123804	0.022338	0.0103017	0.0195354	0.0113028	0.0162338	0.0137112	0.0234579	0.0281174	0.00517241	0.0047619	0.00882613	0.0302115	0.00431034	0.0246914	0.0168394	0.00693241	0.0107034	0.0224138	0.0147348	0.0134276
MBTPS1_2	62	16	84150070	478	CG	0.0143885	0.0142857	0.0130964	0.0155794	0.0163217	0	0.0203046	0.0134159	0.022862	0.0114943	0.0133333	0.0185972	0.0138169	0.00605327		0.0202703	0.0285714	0.0251256	0.0124408	0.0154723	0.0257732	0.00936768	0.0180587	0.0221117	0.0199115	0.0174672	0.0135487	0.0131772	0.011236	0.0144796	0.0214592	0.0157005	0.00857633	0.00947867	0.0148992	0.00993049	0.0425532	0.019214	0.0178344	0.0154374	0.0150602	0.0161565	0.022439	0.0167598
MBTPS1_2	77	16	84150055	493	CG/rs79340982	0.0215724	0.0310663	0.00935454	0.0126521	0.0278662	0.0409091	0.0185811	0.0216718	0.0245971	0.00907441	0.0142591	0.0191184	0.0103627	0.0218182		0.0130513	0.0177802	0.0226273	0.0254438	0.0154976	0.0189003	0.010929	0.0180723	0.0110497	0.020649	0.0218818	0.0125	0.0163743	0.00805153	0.0117541	0.016731	0.0374396	0.011925	0.0220472	0.0131464	0.031746	0.0423729	0.00786026	0.0191327	0.0119863	0.0226244	0.0144312	0.0243665	0.0209059
MBTPS1_2	108	16	84150024	524	CG	0.00862482	0.00755668	0.00888266	0.00778968	0.0107441	0.00454545	0.00337838	0.00722394	0.00507614	0.00845921	0.0111697	0.00584174	0.0120968	0.0145278		0.00630063	0.00807754	0.00313873	0.00590667	0.00570033	0.0154639	0.0046875	0.00676692	0.0110497	0.00883002	0.014556	0.00729167	0.0160772	0.00963082	0.00813008	0.0145798	0.00241546	0.0170648	0.00787402	0.00963222	0.0188305	0	0.00611354	0.00380228	0.010274	0.00753012	0.0127443	0.00778968	0.0132404
MBTPS1_2	114	16	84150018	530	CG	0.0153625	0.00503778	0.0149533	0.0136519	0.00797448	0	0.00506757	0.00928793	0.00592718	0.0145191	0.00528278	0.0175439	0.0127241	0.00606061		0.0153291	0.00430571	0.0113279	0.0112293	0.00570033	0.00859107	0.00625	0.013544	0.0149419	0.0036846	0.010219	0.0135558	0.012873	0.0112179	0.0117435	0.012441	0.00362757	0.00341297	0.00473186	0.0105171	0.00496524	0.0127119	0.00613497	0.0126904	0.00856164	0.00906344	0.00595745	0.0107108	0.0118632
MBTPS1_2	128	16	84150004	544	CG	0.0100623	0.0117845	0.00653595	0.00633528	0.00676752	0.00904977	0.0152027	0.0144181	0.00338409	0.0193353	0.00962135	0.00477707	0.0120968	0.00968523		0.0139703	0.00592672	0.00942803	0.0118133	0.00814332	0.0120069	0.00312744	0.00827068	0.0154782	0.00736377	0.00436681	0.00572917	0.0131772	0.00801282	0.00903342	0.014157	0.00845411	0.0136752	0.00789889	0.0131349	0.00793651	0.00847458	0.0034965	0.00126743	0.0188679	0.00753012	0.00255537	0.00976562	0.00906555
MBTPS1_2	144	16	84149988	560	CG	0.00766651	0.00421585	0.00607477	0.0112086	0.00557547	0.00452489	0.003367	0.00720906	0.00338409	0.00845921	0.00775675	0.00744285	0.00806452	0.0145278		0.0067659	0.00539084	0.00942803	0.0070922	0.00407166	0.00687285	0.00860047	0.00527506	0.00821918	0.00515844	0.00800582	0.00677789	0.00937592	0.0111821	0.0108206	0.00773196	0.00724638	0.00512821	0	0.00876424	0.00397219	0.00847458	0.00611888	0.0089172	0.00343053	0	0.00765957	0.00292969	0.00279525
MBTPS1_2	147	16	84149985	563	CG	0.0158198	0.0177215	0.0140384	0.0185819	0.0207254	0.00909091	0.010118	0.0092688	0.0127119	0.0090799	0.021118	0.0127728	0.0103866	0.0350665		0.0162675	0.00648649	0.0106851	0.0148017	0.00733496	0.0155172	0.0274295	0.0143505	0.0187019	0.0257922	0.0102041	0.0172594	0.0164367	0.014377	0.017148	0.0167742	0.00968523	0.0239316	0.00315956	0.0298246	0.00894632	0.034188	0.0218531	0.0165394	0.00856164	0.015083	0.0110638	0.0166178	0.0153954
MBTPS1_2	165	16	84149967	581	CG	0.00681044	0.00414508	0.00566251	0.00528479	0.00428776	0	0.00204918	0.00875	0.00715746	0.00359195	0.00782414	0.00711514	0.00416378	0.00285307		0.00641368	0.00757576	0.00699844	0.00637394	0.00389864	0.0101833	0.00658514	0.00919963	0.0107095	0.00620018	0.0139738	0.00704676	0.00903405	0.0037594	0.00215285	0.0102617	0.00707214	0.00412371	0.0187266	0.0105597	0.0156627	0.0103093	0.00728408	0.00909091	0.00608519	0.00716846	0.00808081	0.0115741	0.001657
[truncated: 148 more columns]

## Sheet: read me
Sheet Name	Labeling and Description	_x000D_
Efficiency	Transferred(C->T)	The number of bases C converted to T after salt treatment
Efficiency	All Base(C)	Total number of base Cs in the reference sequence (non-CpG sites)
Efficiency	Efficiency	Salt treatment conversion efficiency
Methy. Table	Target	target fragment
Methy. Table	Position	Position of methylation site on target fragment
Methy. Table	Chr	The chromosome where the fragment is located
Methy. Table	GenomePosition	The location of the locus on the reference genome
Methy. Table	Distance2TSS	The distance of this site relative to the transcription start site on the reference genome
Methy. Table	Type	Methylation site type (usually CG, CHG, CHH), if it is detected that there are high frequency mutations (greater than 0.01) at this site in the 1000g database, add the /SNP flag
Haplotype	Haplotype	Haplotype
Haplotype	Depth	Number of sequences that support this haplotype
Methy. Info	Mathy. Base(C)	The amount of methylation at this site
Methy. Info	All Base	The total number of sequences at this locus
Methy. Info	Percentage	Site methylation ratio
